# Supplementary material for: Culicidae-centric metabarcoding through targeted use of D2 ribosomal DNA primers
Source: PeerJ. 2020 Jun 3;8:e9057. doi: 10.7717/peerj.9057 (PMC7315618; doi:10.7717/peerj.9057)
Supplement: Data S2 — Ecopcr results for comparisons between D2 and 16S and D2 and CO1. The parameters are described for only those species that are shared between amplicons of the respective comparisons. [file peerj-08-9057-s002.xlsx]

## Sheet: 16S-D2_shared_with_Talaga
These are the available GenBank accessions that contain both the forward and reverse primers used herein to amplify D2. They have been trimmed to include only those species that are shared with the analogous dataset for Talaga et al. 2017.
GenBank Accession	length of the original sequence	taxonomic rank	taxid	scientific name	taxid of the genus	genus	taxid of the family	family	taxid of the super kingdom	super kingdom	strand (direct or reverse)	target sequence of the first primer	number of mismatches for the first primer	target sequence of the second primer	number of mismatches for the second primer	length of the amplified fragment (excluding primers)	sequence	definition
JX070802	531	species	74869	Anopheles maculatus	7164	Anopheles	7157	Culicidae	2759	Eukaryota	D	AAGCACTCTGAATAGAGAGTC	0	TGGTCCGTGTTTCAAGAC	0	410	aatactgccatgagaccgatagcgaacaagtaccgtgagggaaagttgaaaagcactctgaatagagagtcAAACAGTACGTGAAACTGCCTAGGGGACGCAAACCCGTTGAACTCAATGATCCGAGCGGCGATATTCAGCGGTGGCCGGCCCGTCCGGCTGCCGTGCACTTATCGACCCGCACCAAACGGACATCGCGATCCATTGCGCATCTGCGTGAGCATACCATTCCGGCATACGGCCCCTGGCTCGTGGTGGACGGCTCCCTAGTAGGGCGCGGCTTGGCGGCCGCCCCAAACGGGGGTCTCTGCGCCTTTCACACCCGAGAGGCGCGGGTCCGACCGAGCTCCGGGAGTGCCGCTGGAAGCACGATGGACCGTACGACCGGGGTCTAGGGAG…	Anopheles maculatus isolate D2_39 28S ribosomal RNA gene, partial sequence
JX070786	517	species	112268	Anopheles minimus	7164	Anopheles	7157	Culicidae	2759	Eukaryota	D	AAGCACTCTGAATAGAGAGTC	0	TTGTCCGTGTTTCAAGAC	1	399	aataccgccatgagaccgatagaagacaagtaccgtgagggaaagttgaaaagcactctgaatagagagtcAAATAGTACGTGAAACTGCCTAGGGGACGCAAACCTGTTGAACTCAATGATCCGGGCGGCGATATTCAGCGGTGGTCCACCCTTACGGGTTGGCTGCCGTGCACTTATCGGTCCGCAGTAACGGACATCGCGATCCATTACAATGGGGCATTCCACCAATGGCCCCTAGCTCGTGGTTGGCGGCTTTCTAGTAAGGTGGCTCGGCGGCCTCCCTGAGCGAAAGTCTCCGCGCCCTTCACACCAAAGGGGCGCAGGGCCCGATCGAGCTTGGTGTGCCGCTGGAAATGTGATGGATTGGTATGAGCGGGGTTCGAGTGTGTGGCCTTAA…	Anopheles minimus isolate D2_102 28S ribosomal RNA gene, partial sequence
L22060	5298	species	7160	Aedes albopictus	7158	Aedes	7157	Culicidae	2759	Eukaryota	D	AAGCACTCTGAATAGAGAGTC	0	TGGTCCGTGTTTCAAGAC	0	380	aaatatcaccacgagaccgatagcgaacaagtaccgtgaggaaagttgaaaagcactctgaatagagagtcAAAAAGTACGTGAAACTGCCTAGGGCTCAAGCCCGTTGAACTCGATTATCCGAGCGGAGACATTCACCTGCGGTTGGCCGGCGACGGCACGGCCGCAGGGCACTTGTCTCTCGCACTAGCCAAGAGGACACTGCGATCCATTACGAAACAGCTTTCGCGCAAGCGCAAGGTCGCCCGACAACTGCCCCCTGGTGCTGGTTGCTTGCCCCACAGTAGCGACGCTCAGTTCTGAAGGCCTGTGCCGCGAGGTGGGGCTTACTGCACGTGGTGTTCTAGCAGTCGGGCGCGTGATGGATTCCCCCGGACACCGGGTGGTCTTCCCGTAAGG…	Aedes albopictus 18S, 5.8S, and 28S ribosomal RNA genes
MG242555	757	species	120870	Ochlerotatus caspius	190765	Ochlerotatus	7157	Culicidae	2759	Eukaryota	D	AAGCACTCTGAATAGAGAGTC	0	TGGTCCGTGTTTCAAGAC	0	377	aatatcaccacgagaccgatagcgaacaagtaccgtgagggaaagttgaaaagcactctgaatagagagtcAAAAAGTACGTGAAACTGCCTAGGGCTCAAGCCCGTTGAACTCGATTATCCGAGCGGAGACATTCACCTGCGGTTGGCCGGCAACGGTCCGCCGCAGGGCACTTGTCTCCCGCGCACAAGAGGACATTGCGATCCATTACGAAACAGCTTTAGCGTCGCAAGACGCAAGGTCGCCCGACAGTTGCCCCTTGGTGCTGGTTGCTTGCCCCACAGTAGCGACGCTCAGTTCTGAAGGCCTGTGCCGCGAGGTGGGGCTTACTGCACGTGGTGTTTGCAGTCGGGCGCGTGATGGATTTCCGCGTACACCGTCGGTCTTCCCGCAATGGAC…	Ochlerotatus caspius 28S ribosomal RNA gene, partial sequence
MG242540	774	species	7159	Aedes aegypti	7158	Aedes	7157	Culicidae	2759	Eukaryota	D	AAGCACTCTGAATAGAGAGTC	0	TGGTCCGTGTTTCAAGAC	0	384	aatatcaccacgagaccgatagcgaacaagtaccgtgagggaaagttgaaaagcactctgaatagagagtcAAAAAGTACGTGAAACTGCCTAGGGCTCAAGCCCGTTGAACTCGATTATCCGATGCGGAGACATTCACCTGCGGTGTGCTGCGAACCAGTGCGCCGCAGGGCACTTGTCTACTCGCGCTAGCCAAGAGGACACTGCGATCCATTACGAAACAGCTTTCGCGTCGCGAGACGCAAGGTCGCCCGACAGTTGCCCCCTGGTGCTGGTAGCTTGCCCCACAGTAGCGACGCTCAGTTCTGAAGGCCTGTGCCGCGAGGTGGGGCTTACTGCACGTGGTGTTTGCAGTCGGGCGCGTGATGGATTCCCCCGGACACCGGGTGGTCTTCCCGC…	Aedes aegypti 28S ribosomal RNA gene, partial sequence
KF687488	506	species	7159	Aedes aegypti	7158	Aedes	7157	Culicidae	2759	Eukaryota	D	AAGCACTCTGAATAGAGAGTC	0	TTGTCCGTGTTTCAAGAC	1	384	aatatcaccacgagaccgatagcgaacaagtaccgtgagggaaagttgaaaagcactctgaatagagagtcAAAAAGTACGTGAAACTGCCTAGGGCTCAAGCCCGTTGAACTCGATTATCCGATGCGGAGACATTCACCTGCGGTGTGCTGCGACCCAGTGCGCCGCAGGGCACTTGTCTACTCGCGCTAGCCAAGAGGACACTGCGATCCATTACGAAACAGCTTTCGCGTCGCGAGACGCAAGGTCGCCCGACAGTTGCCCCCTGGTGCTGGTAGCTTGCCCCACAGTAGCGACGCTCAGTTCTGAAGGCCTGTGCCGCGAGGTGGGGCTTACTGCACGTGGTGTTTGCAGTCGGGCGCGTGATGGATTCCCCCGGACACCGGGTGGTCTTCCCGC…	Aedes aegypti 28S ribosomal RNA gene, partial sequence
XM_001865926	1110	species	7176	Culex quinquefasciatus	7174	Culex	7157	Culicidae	2759	Eukaryota	D	AAGCACTCTGAATAGAGAGTC	0	TGGTCCGTGTTTCAAGAC	0	389	aatatcaccacgagaccgatagcgaacaagtaccgtgagggaaagttgaaaagcactctgaatagagagtcAAAAAGTACGTGAAACTGCCTAGGGCTCAAGCCCGTTGAACTCGATTATCCGCGGCGGAGATATTCACCTGCGGTTGGCCCTCACCGGTCCGCCGCAGGGCACTTACCTCCTGCCTCACGAGGACGTTGCGATCCATTACGGAACGGTTAGCCAGCAATGGCTACAGGCCCGGCACCTGCCCCTTGGCATTTGGTTGCTTGTCCCACAGTAGCGGCGCTCAGTTCGGAAGGCCTGCGCTGCAACCTGAGGCTTACCGGTGCGTGGTGTGCAGCCGGGCGCGTGATGGATTCCCGCGTCCACCGTCTCGGGAGAGGCTTGCCTCTCCCA…	Culex quinquefasciatus conserved hypothetical protein, mRNA
MG242580	765	species	140438	Aedes japonicus	7158	Aedes	7157	Culicidae	2759	Eukaryota	D	AAGCACTCTGAATAGAGAGTC	0	TGGTCCGTGTTTCAAGAC	0	381	aatatcaccacgagaccgatagcgaacaagtaccgtgagggaaagttgaaaagcactctgaatagagagtcAAAAAGTACGTGAAACTGCCTAGGGCTCAAGCCCGTTGAACTCGATTATCCGAGCGGAGACATTCACCTGCGGCCGGGGGCTTTGCCGCCCAYGCTGCAGGGCACTTGTCTCCCGCGCTACACGAGGACATTGCGATCCATTACGAAACAGCTTCTGCGTCGCAAGACGCAAGGTCGCCCGACAGTTGCCCCTTGGTGCCGGTTGCTTGCCCCACCGTAGCGACGCTCAGTTCYGAAGGCCTGTGCCGCGAGCTGGGGCTTACTGCACGTGGTGTTTGCAGTCGGGCGCGTGATGGATTCCAGCGTACACCGTCGGCCTTCCCGCAAT…	Aedes japonicus 28S ribosomal RNA gene, partial sequence
MG242543	774	species	7160	Aedes albopictus	7158	Aedes	7157	Culicidae	2759	Eukaryota	D	AAGCACTCTGAATAGAGAGTC	0	TGGTCCGTGTTTCAAGAC	0	384	aatatcaccacgagaccgatagcgaacaagtaccgtgagggaaagttgaaaagcactctgaatagagagtcAAAAAGTACGTGAAACTGCCTAGGGCTCAAGCCCGTTGAACTCGATTATCCGAGCGGAGACATTCACCTGCGGTTGGCCGGCGACGGCACGGCCGCAGGGCACTTGTCTCTCGCACTAGCCAAGAGGACACTGCGATCCATTACGAAACAGCTTTCGCGCCGCAAGGCGCAAGGTCGCCCGACAACTGCCCCCTGGTGCTGGTTGCTTGCCCCACAGTAGCGACGCTCAGTTCTGAAGGCCTGTGCCGCGAGGTGGGGCTTACTGCACGTGGTGTTCTAGCAGTCGGGCGCGTGATGGATTCCCCCGGACACCGGGTGGTCTTCCCGT…	Aedes albopictus 28S ribosomal RNA gene, partial sequence
GU384725	1624	species	261159	Anopheles sineroides	7164	Anopheles	7157	Culicidae	2759	Eukaryota	D	AAGCACTCTGAATAGAGAGTC	0	TGGTCCGTGTTTCAAGAC	0	457	aatacgaccatgagaccgatagtaaacaagtaccgtgtgggaaagttgaaaagcactctgaatagagagtcAAAGAGTACGTGAAACTGCCGAGGGTGTAAAGCCTGTTGAACTCAATTATCCGTAGATGCCCGCAACCTGGATTTTGGCTGTCATGCGACTGTAGGCTCACGCTCTCGGTCGTAGGCCATATCCTAGCGGGGATCGAGCGCGGACATCGTGATCCATTACGCAAACCCAATGCGAGCGGCGACTCCGGTTGCTGCGAGCATATCCAACACCAGGTCCCAGAACACGCGGTCGACCCTCTAGTAGTGGCGCTCAGCTTAAGGCCGGCGTCGCGAACGGGGGATCGAGGCTCCGGTCTCGAGTTCGGCTAGTTCAGGTGTGCCGTTGGAT…	Anopheles sineroides isolate SINEK03 5.8S ribosomal RNA gene, partial sequence; internal transcribed spacer 2, complete sequence; and 28S ribosomal RNA gene, partial sequence
GU384724	1624	species	261159	Anopheles sineroides	7164	Anopheles	7157	Culicidae	2759	Eukaryota	D	AAGCACTCTGAATAGAGAGTC	0	TGGTCCGTGTTTCAAGAC	0	457	aatacgaccatgagaccgatagtaaacaagtaccgtgtgggaaagttgaaaagcactctgaatagagagtcAAAGAGTACGTGAAACTGCCGAGGGTGTAAAGCCTGTTGAACTCAATTATCCGTAGATGCCCGCAACCTGGATTTTGGCTGTCATGCGACTGTAGGCTCACGCTCTCGGTCGTAGGCCATATCCTAGCGGGGATCGAGCGCGGACATCGTGATCCATTACGCAAACCCAATGCGAGCGGCGACTCCGGTTGCTGCGAGCATATCCAACACCAGGTCCCAGAACACGCGGTCGACCCTCTAGTAGTGGCGCTCAGCTTAAGGCCGGCGTCGCGAACGGGGGATCGAGGCTCCGGTCTCGAGTTCGGCTAGTTCAGGTGTGCCGTTGGAT…	Anopheles sineroides isolate SINEK02 5.8S ribosomal RNA gene, partial sequence; internal transcribed spacer 2, complete sequence; and 28S ribosomal RNA gene, partial sequence
GU384723	1624	species	261159	Anopheles sineroides	7164	Anopheles	7157	Culicidae	2759	Eukaryota	D	AAGCACTCTGAATAGAGAGTC	0	TGGTCCGTGTTTCAAGAC	0	457	aatacgaccatgagaccgatagtaaacaagtaccgtgtgggaaagttgaaaagcactctgaatagagagtcAAAGAGTACGTGAAACTGCCGAGGGTGTAAAGCCTGTTGAACTCAATTATCCGTAGATGCCCGCAACCTGGATTTTGGCTGTCATGCGACTGTAGGCTCACGCTCTCGGTCGTAGGCCATATCCTAGCGGGGATCGAGCGCGGACATCGTGATCCATTACGCAAACCCAATGCGAGCGGCGACTCCGGTTGCTGCGAGCATATCCAACACCAGGTCCCAGAACACGCGGTCGACCCTCTAGTAGTGGCGCTCAGCTTAAGGCCGGCGTCGCGAACGGGGGATCGAGGCTCCGGTCTCGAGTTCGGCTAGTTCAGGTGTGCCGTTGGAT…	Anopheles sineroides isolate SINEK01 5.8S ribosomal RNA gene, partial sequence; internal transcribed spacer 2, complete sequence; and 28S ribosomal RNA gene, partial sequence
GU384722	1637	species	109668	Anopheles lesteri	7164	Anopheles	7157	Culicidae	2759	Eukaryota	D	AAGCACTCTGAATAGAGAGTC	0	TGGTCCGTGTTTCAAGAC	0	459	aatacaaccatgagaccgatagtaaacaagtaccgtgtgggaaagttgaaaagcactctgaatagagagtcAAAAAGTACGTGAAACTGCCGAGGGTGTAAAGCCTGTTGAACTCAATTATCCGTAGAATTTCTGGCAGCCCGGGAAATGGCTGTCACAGATACCGGCCAGTTGTCGGGATCTAGCCATTTCCCTTGCGAGATTCGAGTGCGGACATCGTGATCCATTACGCAAACCCAATGCGAGCGGCGACTCCGGTCGTGCGGCGAGCATATCCAACACCAGGTCCCAGAACAGTGCGGTCGACCCTCTAGTAGTGGCGCTCAGCTTAAGGCCGGCGTCGCAAACGGGGGATCGAGGCTCCGGTCTCGAGTTCGGCCAGTTCCGGTGTGCCGTTGG…	Anopheles lesteri isolate LES06 5.8S ribosomal RNA gene, partial sequence; internal transcribed spacer 2, complete sequence; and 28S ribosomal RNA gene, partial sequence
GU384720	1637	species	109668	Anopheles lesteri	7164	Anopheles	7157	Culicidae	2759	Eukaryota	D	AAGCACTCTGAATAGAGAGTC	0	TGGTCCGTGTTTCAAGAC	0	459	aatacaaccatgagaccgatagtaaacaagtaccgtgtgggaaagttgaaaagcactctgaatagagagtcAAAAAGTACGTGAAACTGCCGAGGGTGTAAAGCTCGTTGAACTCAATTATCCGTAGAATTTCTGGCAGCCCGGGAAATGGCTGTCACAGATACCGGCCAGTTGTCGGGATCTAGCCATTTCCCTTGCGAGATTCGAGTGCGGACATCGTGATCCATTACGCAAACCCAATGCGAGCGGCGACTCCGGTCGTGCGGCGAGCATATCCAACACCAGGTCCCAGAACAGTGCGGTCGACCCTCTAGTAGTGGCGCTCAGCTTAAGGCCGGCGTCGCAAACGGGGGATCGAGGCTCCGGTCTCGAGTTCGGCCAGTTCCGGTGTGCCGTTGG…	Anopheles lesteri isolate LES04 5.8S ribosomal RNA gene, partial sequence; internal transcribed spacer 2, complete sequence; and 28S ribosomal RNA gene, partial sequence
GU384719	1637	species	109668	Anopheles lesteri	7164	Anopheles	7157	Culicidae	2759	Eukaryota	D	AAGCACTCTGAATAGAGAGTC	0	TGGTCCGTGTTTCAAGAC	0	459	aatacaaccatgagaccgatagtaaacaagtaccgtgtgggaaagttgaaaagcactctgaatagagagtcAAAAAGTACGTGAAACTGCCGAGGGTGTAAAGCTCGTTGAACTCAATTATCCGTAGAATTTCTGGCAGCCCGGGAAATGGCTGTCACAGATACCGGCCAGTTGTCGGGATCTAGCCATTTCCCTTGCGAGATTCGAGTGCGGACATCGTGATCCATTACGCAAACCCAATGCGAGCGGCGACTCCGGTCGTGCGGCGAGCATATCCAACACCAGGTCCCAGAACAGTGCGGTCGACCCTCTAGTAGTGGCGCTCAGCTTAAGGCCGGCGTCGCAAACGGGGGATCGAGGCTCCGGTCTCGAGTTCGGCCAGTTCCGGTGTGCCGTTGG…	Anopheles lesteri isolate LES03 5.8S ribosomal RNA gene, partial sequence; internal transcribed spacer 2, complete sequence; and 28S ribosomal RNA gene, partial sequence
GU384718	1637	species	109668	Anopheles lesteri	7164	Anopheles	7157	Culicidae	2759	Eukaryota	D	AAGCACTCTGAATAGAGAGTC	0	TGGTCCGTGTTTCAAGAC	0	459	aatacaaccatgagaccgatagtaaacaagtaccgtgtgggaaagttgaaaagcactctgaatagagagtcAAAAAGTACGTGAAACTGCCGAGGGTGTAAAGCCTGTTGAACTCAATTATCCGTAGAATTTCTGGCAGCCCGGGAAATGGCTGTCACAGATACCGGCCAGTTGTCGGGATCTAGCAATTTCCCTTGCGAGATTCGAGTGCGGACATCGTGATCCATTACGCAAACCCAATGCGAGCGGCGACTCCGGTCGTGCGGCGAGCATATCCAACACCAGGTCCCAGAACAGTGCGGTCGACCCTCTAGTAGTGGCGCTCAGCTTAAGGCCGGCGTCGCAAACGGGGGATCGAGGCTCCGGTCTCGAGTTCGGCCAGTTCCGGTGTGCCGTTGG…	Anopheles lesteri isolate LES01 5.8S ribosomal RNA gene, partial sequence; internal transcribed spacer 2, complete sequence; and 28S ribosomal RNA gene, partial sequence
GU384717	1637	species	109668	Anopheles lesteri	7164	Anopheles	7157	Culicidae	2759	Eukaryota	D	AAGCACTCTGAATAGAGAGTC	0	TGGTCCGTGTTTCAAGAC	0	459	aatacaaccatgagaccgatagtaaacaagtaccgtgtgggaaagttgaaaagcactctgaatagagagtcAAAAAGTACGTGAAACTGCCGAGGGTGTAAAGCTCGTTGAACTCAATTATCCGTAGAATTTCTGGCAGCCCGGGAAATGGCTGTCACAGATACCGGCCAGTTGTCGGGATCTAGCCATTTCCCTTGCGAGATTCGAGTGCGGACATCGTGATCCATTACGCAAACCCAATGCGAGCGGCGACTCCGGTCGTGCGGCGAGCATATCCAACACCAGGTCCCAGAACAGTGCGGTCGACCCTCTAGTAGTGGCGCTCAGCTTAAGGCCGGCGTCGCAAACGGGGGATCGAGGCTCCGGTCTCGAGTTCGGCCAGTTCCGGTGTGCCGTTGG…	Anopheles lesteri isolate LES02 5.8S ribosomal RNA gene, partial sequence; internal transcribed spacer 2, complete sequence; and 28S ribosomal RNA gene, partial sequence
GU384713	1640	species	296717	Anopheles kleini	7164	Anopheles	7157	Culicidae	2759	Eukaryota	D	AAGCACTCTGAATAGAGAGTC	0	TGGTCCGTGTTTCAAGAC	0	459	aatacgaccatgagaccgatagtaaacaagtaccgtgtgggaaagttgaaaagcactctgaatagagagtcAAATAGTACGTGAAACTGCCGAGGGTGTAAAGCCTGTTGAACTCGATTATCCGTAGTTTCTGGCAACGTGGGTTTTGGCTGTCACGCAGAAGGGGGCAAATGCTCTCTTCTGTATGCCTTGATCCTAGCCAGGAACGAGTGCGGACATCGTGATCCATTACGCAAACCAAATGCGAGCGGCGACTCCGGTTGCTGCGAGCATATCCAACATCAGGTCCCAGAACATGCGGTCGACCCTCTAGTAGTGGCGCTCAGCTTAAGGCCGGCGTCGCGAACGGGGGATCGAGGCTCCGGTCTCGAGTTCGGCTAGTTCAGGTGTGCCGTTGGA…	Anopheles kleini isolate KLEK01 5.8S ribosomal RNA gene, partial sequence; internal transcribed spacer 2, complete sequence; and 28S ribosomal RNA gene, partial sequence
GU384712	1639	species	254294	Anopheles belenrae	7164	Anopheles	7157	Culicidae	2759	Eukaryota	D	AAGCACTCTGAATAGAGAGTC	0	TGGTCCGTGTTTCAAGAC	0	459	aatacgaccatgagaccgatagtaaacaagtaccgtgtgggaaagttgaaaagcactctgaatagagagtcAAATAGTACGTGAAACTGCCGAGGGTGTAAAGCCTGTTGAACTCGATTATCCGTAGCTCCTGGCAACGTGGGTTTTGGCTGTCACGCAGAAGGGGGCAAATGCTCTCTTCTGTATGCCTTGATCCTAGCCAGGAGCGAGTGCGGACGTCGTGATCCATTACGCAAACCAAATGCGAGCGGCGACTCCGGTTGCTGCGAGCATATCCAACATCAGGTCCCAGAACATGCGGTCGACCCTCTAGTAGTGGCGCTCAGCTTAAGGCCGGCGTCGCGAACGGGGGATCGAGGCTCCGGTCTCGAGTTCGGCTAGTTCAGGTGTGCCGTTGGA…	Anopheles belenrae isolate BELK06 5.8S ribosomal RNA gene, partial sequence; internal transcribed spacer 2, complete sequence; and 28S ribosomal RNA gene, partial sequence
GU384711	1639	species	254294	Anopheles belenrae	7164	Anopheles	7157	Culicidae	2759	Eukaryota	D	AAGCACTCTGAATAGAGAGTC	0	TGGTCCGTGTTTCAAGAC	0	459	aatacgaccatgagaccgatagtaaacaagtaccgtgtgggaaagttgaaaagcactctgaatagagagtcAAATAGTACGTGAAACTGCCGAGGGTGTAAAGCCTGTTGAACTCGATTATCCGTAGCTCCTGGCAACGTGGGTTTTGGCTGTCACGCAGAAGGGGGCAAATGCTCTCTTCTGTATGCCTTGATCCTAGCCAGGAGCGAGTGCGGACATCGTGATCCATTACGCAAACCAAATGCGAGCGGCGACTCCGGTTGCTGCGAGCATATCCAACATCAGGTCCCAGAACATGCGGTCGACCCTCTAGTAGTGGCGCTCAGCTTAAGGCCGGCGTCGCGAACGGGGGATCGAGGCTCCGGTCTCGAGTTCGGCTAGTTCAGGTGTGCCGTTGGA…	Anopheles belenrae isolate BELK05 5.8S ribosomal RNA gene, partial sequence; internal transcribed spacer 2, complete sequence; and 28S ribosomal RNA gene, partial sequence
GU384710	1639	species	254294	Anopheles belenrae	7164	Anopheles	7157	Culicidae	2759	Eukaryota	D	AAGCACTCTGAATAGAGAGTC	0	TGGTCCGTGTTTCAAGAC	0	459	aatacgaccatgagaccgatagtaaacaagtaccgtgtgggaaagttgaaaagcactctgaatagagagtcAAATAGTACGTGAAACTGCCGAGGGTGTAAAGCCTGTTGAACTCGATTATCCGTAGCTCCTGGCAACGTGGGTTTTGGCTGTCACGCAGAAGGGGGCAAATGCTCACTTCTGTATGCCTTGATCCTAGCCAGGAGCGAGTGCGGACATCGTGATCCATTACGCAAACCAAATGCGAGCGGCGACTCCGGTTGCTGCGAGCATATCCAACATCAGGTCCCAGAACATGCGGTCGACCCTCTAGTAGTGGCGCTCAGCTTAAGGCCGGCGTCGCGAACGGGGGATCGAGGCTCCGGTCTCGAGTTCGGCTAGTTCAGGTGTGCCGTTGGA…	Anopheles belenrae isolate BELK04 5.8S ribosomal RNA gene, partial sequence; internal transcribed spacer 2, complete sequence; and 28S ribosomal RNA gene, partial sequence
GU384700	1648	species	74873	Anopheles sinensis	7164	Anopheles	7157	Culicidae	2759	Eukaryota	D	AAGCACTCTGAATAGAGAGTC	0	TGGTCCGTGTTTCAAGAC	0	450	aatacgaccatgagaccgatagtaaacaagtaccgtgtgggaaagttgaaaagcactctgaatagagagtcAAATAGTACGTGAAACTGCCGAGGGTGTAAAGCCTGTTGAACTCGATTATCCGTAGTTCCTGGCATCGTGGGTTTTGGCTGTCACGCAGAAGGGGGCCTTCTGTATGCCTTGACCCTAGCCAGGAACGAGTGCGGACATCGTGATCCATTACGCAAACCAAATGCGAGCGGCGACTCCGGTTGCTGCGAGCATATCCAACATCAGGTCCCAGAACATGCGGTCGACCCTCTAGTAGTGGCGCTCAGCTTAAGGCCGGCGTTGCGAACGGGGGATCGAGGCTCCGGTCTCGAGTTCGGCTAGTTCCGGTGTGCCGTTGGATGCGTGATG…	Anopheles sinensis isolate SINC01 5.8S ribosomal RNA gene, partial sequence; internal transcribed spacer 2, complete sequence; and 28S ribosomal RNA gene, partial sequence
GU384696	1648	species	74873	Anopheles sinensis	7164	Anopheles	7157	Culicidae	2759	Eukaryota	D	AAGCACTCTGAATAGAGAGTC	0	TGGTCCGTGTTTCAAGAC	0	450	aatacgaccatgagaccgatagtaaacaagtaccgtgtgggaaagttgaaaagcactctgaatagagagtcAAATAGTACGTGAAACTGCCGAGGGTGTAAAGCCTGTTGAACTCGATTATCCGTAGTTCCTGGCATCGTGGGTTTTGGCTGTCACGCAGAAGGGGGCCTTCTGTATGCCTTGACCCTAGCCAGGAACGAGTGCGGACATCGTGATCCATTACGCAAACCAAATGCGAGCGGCGACTCCGGTTGCTGCGAGCATATCCAACATCAGGTCCCAGAACATGCGGTCGACCCTCTAGTAGTGGCGCTCAGCTTAAGGCCGGCGTCGCCAACGGGGGATCGAGGCTCCGGTCTCGAGTTCGGCTAGTTCCGGTGTGCCGTTGGATGCGTGATG…	Anopheles sinensis isolate SINK06 5.8S ribosomal RNA gene, partial sequence; internal transcribed spacer 2, complete sequence; and 28S ribosomal RNA gene, partial sequence
GU384695	1648	species	74873	Anopheles sinensis	7164	Anopheles	7157	Culicidae	2759	Eukaryota	D	AAGCACTCTGAATAGAGAGTC	0	TGGTCCGTGTTTCAAGAC	0	450	aatacgaccatgagaccgatagtaaacaagtaccgtgtgggaaagttgaaaagcactctgaatagagagtcAAATAGTACGTGAAACTGCCGAGGGTGTAAAGCCTGTTGAACTCGATTATCCGTAGTTCCTGGCATCGTGGGTTTTGGCTGTCACGCAGAAGGGGGCCTTCTGTATGCCTTGACCCTAGCCAGGAACGAGTGCGGACATCGTGATCCATTACGCAAACCAAATGCGAGCGGCGACTCCGGTTGCTGCGAGCATATCCAACATCGGGTCCCAGAACATGCGGTCGACCCTCTAGTAGTGGCGCTCAGCTTAAGGCCGGCGTCGCGAACGGGGGATCGAGGCTCCGGTCTCGAGTTCGGCTAGTTCCGGTGTGCCGTTGGATGCGTGATG…	Anopheles sinensis isolate SINK05 5.8S ribosomal RNA gene, partial sequence; internal transcribed spacer 2, complete sequence; and 28S ribosomal RNA gene, partial sequence
GU384694	1648	species	74873	Anopheles sinensis	7164	Anopheles	7157	Culicidae	2759	Eukaryota	D	AAGCACTCTGAATAGAGAGTC	0	TGGTCCGTGTTTCAAGAC	0	450	aatacgaccatgagaccgatagtaaacaagtaccgtgtgggaaagttgaaaagcactctgaatagagagtcAAATAGTACGTGAAACTGCCGAGGGTGTAAAGCCTGTTGAACTCGATTATCCGTAGTTCCTGGCATCGTGGGTTTTGGCTGTCACGCAGAAGGGGGCCTTCTGTATGCCTTGACCCTAGCCAGGAACGAGTGCGGACATCGTGATCCATTACGCAAACCAAATGCGAGCGGCGACTCCGGTTGCTGCGAGCATATCCAACATCAGGTCCCAGAACATGCGGTCGACCCTCTAGTAGTGGCGCTCAGCTTAAGGCCGGCGTCGCGAACGGGGGATCGAGGCTCCGGTCTCGAGTTCGGCTAGTTCCGGTGTGCCGTTGGATGCGTGATG…	Anopheles sinensis isolate SINK04 5.8S ribosomal RNA gene, partial sequence; internal transcribed spacer 2, complete sequence; and 28S ribosomal RNA gene, partial sequence
GU384693	1651	species	74873	Anopheles sinensis	7164	Anopheles	7157	Culicidae	2759	Eukaryota	D	AAGCACTCTGAATAGAGAGTC	0	TGGTCCGTGTTTCAAGAC	0	450	aatacgaccatgagaccgatagtaaacaagtaccgtgtgggaaagttgaaaagcactctgaatagagagtcAAATAGTACGTGAAACTGCCGAGGGTGTAAAGCCTGTTGAACTCGATTATCCGTAGTTCCTGGCATCGTGGGTTTTGGCTGTCACGCAGAAGGGGGCCTTCTGTATGCCTTGACCCTAGCCAGGAACGAGTGCGGACATCGTGATCCATTACGCAAACCAAATGCGAGCGGCGACTCCGGTTGCTGCGAGCATATCCAACATCAGGTCCCAGAACATGCGGTCGACCCTCTAGTAGTGGCGCTCAGCTTAAGGCCGGCGTCGCGAACGGGGGATCGAGGCTCCGGTCTCGAGTTCGGCTAGTTCCGGTGTGCCGTTGGATGCGTGATG…	Anopheles sinensis isolate SINK03 5.8S ribosomal RNA gene, partial sequence; internal transcribed spacer 2, complete sequence; and 28S ribosomal RNA gene, partial sequence
GU384692	1648	species	74873	Anopheles sinensis	7164	Anopheles	7157	Culicidae	2759	Eukaryota	D	AAGCACTCTGAATAGAGAGTC	0	TGGTCCGTGTTTCAAGAC	0	450	aatacgaccatgagaccgatagtaaacaagtaccgtgtgggaaagttgaaaagcactctgaatagagagtcAAATAGTACGTGAAACTGCCGAGGGTGTAAAGCCTGTTGAACTCGATTATCCGTAGTTCCTGGCATCGTGGGTTTTGGCTGTCACGCAGAAGGGGGCCTTCTGTATGCCTTGACCCTAGCCAGGAACGAGTGCGGACATCGTGATCCATTACGCAAACCAAATGCGAGCGGCGACTCCGGTTGCTGCGAGCATATCCAACATCAGGTCCCAGAACATGCGGTCGACCCTCTAGTAGTGGCGCTCAGCTTAAGGCCGGCGTCGCGAACGGGGGATCGAGGCTCCGGTCTCGAGTTCGGCTAGTTCCGGTGTGCCGTTGGATGCGTGATG…	Anopheles sinensis isolate SINK02 5.8S ribosomal RNA gene, partial sequence; internal transcribed spacer 2, complete sequence; and 28S ribosomal RNA gene, partial sequence
GU384691	1648	species	74873	Anopheles sinensis	7164	Anopheles	7157	Culicidae	2759	Eukaryota	D	AAGCACTCTGAATAGAGAGTC	0	TGGTCCGTGTTTCAAGAC	0	450	aatacgaccatgagaccgatagtaaacaagtaccgtgtgggaaagttgaaaagcactctgaatagagagtcAAATAGTACGTGAAACTGCCGAGGGTGTAAAGCCTGTTGAACTCGATTATCCGTAGTTCCTGGCATCGTGGGTTTTGGCTGTCACGCAGAAGGGGGCCTTCTGTATGCCTTGACCCTAGCCAGGAACGAGTGCGGACATCGTGATCCATTACGCAAACCAAATGCGAGCGGCGACTCCGGTTGCTGCGAGCATATCCAACATCAGGTCCCAGAACATGCGGTCGACCCTCTAGTAGTGGCGCTCAGCTTAAGGCCGGCGTCGCGAACGGGGGATCGAGGCTCCGGTCTCGAGTTCGGCTAGTTCCGGTGTGCCGTTGGATGCGTGATG…	Anopheles sinensis isolate SINK01 5.8S ribosomal RNA gene, partial sequence; internal transcribed spacer 2, complete sequence; and 28S ribosomal RNA gene, partial sequence
GU384709	1639	species	254294	Anopheles belenrae	7164	Anopheles	7157	Culicidae	2759	Eukaryota	D	AAGCACTCTGAATAGAGAGTC	0	TGGTCCGTGTTTCAAGAC	0	459	aatacgaccatgagaccgatagtaaacaagtaccgtgtaggaaagttgaaaagcactctgaatagagagtcAAATAGTACGTGAAACTGCCGAGGGTGTAAAGCCTGTTGAACTCGATTATCCGTAGCTCCTGGCAACGTGGGTTTTGGCTGTCACGCAGAAGGGGGCAAATGCTCTCTTCTGTATGCCTTGATCCTAGCCAGGAGCGAGTGCGGACATCGTGATCCATTACGCAAACCAAATGCGAGCGGCGACTCCGGTTGCTGCGAGCATATCCAACATCAGGTCCCAGAACATGCGGTCGACCCTCTAGTAGTGGCGCTCAGCTTAAGGCCGGCGTCGCGAACGGGGGATCGAGGCTCCGGTCTCGAGTTCGGCTAGTTCAGGTGTGCCGTTGGA…	Anopheles belenrae isolate BELK03 5.8S ribosomal RNA gene, partial sequence; internal transcribed spacer 2, complete sequence; and 28S ribosomal RNA gene, partial sequence
GU384708	1639	species	254294	Anopheles belenrae	7164	Anopheles	7157	Culicidae	2759	Eukaryota	D	AAGCACTCTGAATAGAGAGTC	0	TGGTCCGTGTTTCAAGAC	0	459	aatacgaccatgagaccgatagtaaacaagtaccgtgtgggaaagttgaaaagcactctgaatagagagtcAAATGGTACGTGAAACTGCCGAGGGTGTAAAGCCTGTTGAACTCGATTATCCGTAGCTCCTGGCAACGTGGGTTTTGGCTGTCACGCAGAAGGGGGCAAATGCTCTCTTCTGTATGCCTTGATCCTAGCCAGGAGCGAGTGCGGACATCGTGATCCATTACGCAAACCAAATGCGAGCGGCGACTCCGGTTGCTGCGAGCATATCCAACATCAGGTCCCAGAACATGCGGTCGACCCTCTAGTAGTGGCGCTCAGCTTAAGGCCGGCGTCGCGAACGGGGGATCGAGGCTCCGGTCTCGAGTTCGGCTAGTTCAGGTGTGCCGTTGGA…	Anopheles belenrae isolate BELK02 5.8S ribosomal RNA gene, partial sequence; internal transcribed spacer 2, complete sequence; and 28S ribosomal RNA gene, partial sequence
GU384707	1639	species	254294	Anopheles belenrae	7164	Anopheles	7157	Culicidae	2759	Eukaryota	D	GAGCACTCTGAATAGAGAGTC	1	TGGTCCGTGTTTCAAGAC	0	459	aatacgaccatgagaccgatagtaaacaagtaccgtgtgggaaagttgaagagcactctgaatagagagtcAAATAGTACGTGAAACTGCCGAGGGTGTAAAGCCTGTTGAACTCGATTATCCGTAGCTCCTGGCAACGTGGGTTTTGGCTGTCACGCAGAAGGGGGCAAATGCTCTCTTCTGTATGCCTTGATCCTAGCCAGGAGCGAGTGCGGACATCGTGATCCATTACGCAAACCAAATGCGAGCGGCGACTCCGGTTGCTGCGAGCATATCCAACATCAGGTCCCAGAACATGCGGTCGACCCTCTAGTAGTGGCGCTCAGCTTAAGGCCGGCGTCGCGAACGGGGGATCGAGGCTCCGGTCTCGAGTTCGGCTAGTTCAGGTGTGCCGTTGGA…	Anopheles belenrae isolate BELK01 5.8S ribosomal RNA gene, partial sequence; internal transcribed spacer 2, complete sequence; and 28S ribosomal RNA gene, partial sequence
GU384698	1648	species	74873	Anopheles sinensis	7164	Anopheles	7157	Culicidae	2759	Eukaryota	D	AAGCACTCCGAATAGAGAGTC	1	TGGTCCGTGTTTCAAGAC	0	450	aatacgaccatgagaccgatagtaaacaagtaccgtgtgggaaagttgaaaagcactccgaatagagagtcAAATAGTACGTGAAACTGCCGAGGGTGTAAAGCCTGTTGAACTCGATTATCCGTAGTTCCTGGCATCGTGGGTTTTGGCTGTCACGCAGAAGGGGGCCTTCTGTATGCCTTGACCCTAGCCAGGAACGAGTGCGGACATCGTGATCCATTACGCAAACCAAATGCGAGCGGCGACTCCGGTTGCTGCGAGCATATCCAACATCAGGTCCCAGAACATGCGGTCGACCCTCTAGTAGTGGCGCTCAGCTTAAGGCCGGCGTCGCGAACGGGGGATCGAGGCTCCGGTCTCGAGTTCGGCTAGTTCCGGTGTGCCGTTGGATGCGTGATG…	Anopheles sinensis isolate SINT01 5.8S ribosomal RNA gene, partial sequence; internal transcribed spacer 2, complete sequence; and 28S ribosomal RNA gene, partial sequence
KF687519	512	species	545656	Culex modestus	7174	Culex	7157	Culicidae	2759	Eukaryota	D	AAGCACTCTGAATAGAGAGTC	0	TTTTCCGTGTTTCAAGAC	2	389	aatatcaccacgagaccgatagcgaacaagtaccgtgagggaaagttgaaaagcactctgaatagagagtcAAAAAGTACGTGAAACTGCCTAGGGCTCAAGCCCGTTGAACTCGATTATCCGCGGCGGAGATATTCACCTGCGGCTGGCCCTTTCCGGGTTCACCGCAGGGCACTTACCTCCTGCCTCACGAGGACGTTGCGATCCATTACGAAACACTCTAGCCAGGCAACTGGCTACAGGCCCGGCAACTGCCCCTTGGCATCTGGTTGCTTGTCCCACAGTAGCGGCGCTCAGTTCGGAAGGCCTGTGTCGCGACCTGGGGCTTACCGGTGCGTGGTGTGCAGCCGGGCGCGTGATGGATTCCCGCGGACACCGTCTCGGGTGCTTGCTCACCTA…	Culex modestus 28S ribosomal RNA gene, partial sequence
JX624228	654	species	30069	Anopheles stephensi	7164	Anopheles	7157	Culicidae	2759	Eukaryota	D	AAGCACTCTGAATAGAGAGTC	0	GGTCCCGGTTTTCAAGAC	5	390	aatatcaccacgagaccgatagcgaacaagtaccgtgagggaaagttgaaaagcactctgaatagagagtcAAAAAGTACGTGAAACTGCCTAGGGCTCAAGCCCGTTGAACTCGATTATCCGCGGCGGAGATATTCACCTGCGGTTGGCCCTCACCCGGTCCGCCGCAGGGCACTTACCTCCTGCCTCACGAGGACGTTGCGATCCATTACGAAACGGTTAGCCAGCGATGGCTACAGGCCCGGCACCTGCCCCTTGGCATCTGGTTGCTTGTCCCACAGTAGCGGCGCTCAGTTCGGAAGGCCTGCGCCGCAACCTGGGGCTTACCGGTGCGTGGTGTGCAGCCGGGCGCGTGATGGATTCCCGCGTACACCGTCTCGGGAGAGGCTCGCCTCTCCC…	Anopheles stephensi voucher UMZD224 28S ribosomal RNA gene, partial sequence
JX624228	654	species	30069	Anopheles stephensi	7164	Anopheles	7157	Culicidae	2759	Eukaryota	D	AAGCACTCTGAATAGAGAGTC	0	TTGGTCCTGTTTCAAGAC	4	533	aatatcaccacgagaccgatagcgaacaagtaccgtgagggaaagttgaaaagcactctgaatagagagtcAAAAAGTACGTGAAACTGCCTAGGGCTCAAGCCCGTTGAACTCGATTATCCGCGGCGGAGATATTCACCTGCGGTTGGCCCTCACCCGGTCCGCCGCAGGGCACTTACCTCCTGCCTCACGAGGACGTTGCGATCCATTACGAAACGGTTAGCCAGCGATGGCTACAGGCCCGGCACCTGCCCCTTGGCATCTGGTTGCTTGTCCCACAGTAGCGGCGCTCAGTTCGGAAGGCCTGCGCCGCAACCTGGGGCTTACCGGTGCGTGGTGTGCAGCCGGGCGCGTGATGGATTCCCGCGTACACCGTCTCGGGAGAGGCTCGCCTCTCCC…	Anopheles stephensi voucher UMZD224 28S ribosomal RNA gene, partial sequence
HM807288	495	species	7176	Culex quinquefasciatus	7174	Culex	7157	Culicidae	2759	Eukaryota	D	AAGCACTCTGAATAGAGAGTC	0	TTGTCCGTGTTTCAAGAC	1	390	aatatcaccacgagaccgatagcgaacaagtaccgtgagggaaagttgaaaagcactctgaatagagagtcAAAAAGTACGTGAAACTGCCTAGGGCTCAAGCCCGTTGAACTCGATTATCCGCGGCGGAGATATTCACCTGCGGTTGGCCCTCACCCGGTCCGCCGCAGGGCACTTACCTCCTGCCTCACGAGGACGTTGCGATCCATTACAAAACGGTTAGCCAGCGATGGCTACAGGCCCGGCACCTGCCCCTTGGCATCTGGTTGCTTGTCCCACAGTAGCGGCGCTCAGTTCGGAAGGCCTGCGCCGCAACCTGGGGCTTACCGGTGCGTGGTGTGCAGCCGGGCGCGTGATGGATTCCCGCGTACACCGTCTCGGGAGAGGCTCGCCTCTCCC…	Culex quinquefasciatus isolate 03TNV 28S ribosomal RNA gene, partial sequence
HM807287	500	species	7176	Culex quinquefasciatus	7174	Culex	7157	Culicidae	2759	Eukaryota	D	AAGCACTCTGAATAGAGAGTC	0	TGTCCGGTGTTTCAAGAC	3	390	aatatcaccacgagaccgatagcgaacaagtaccgtgagggaaagttgaaaagcactctgaatagagagtcAAAAAGTACGTGAAACTGCCTAGGGCTCAAGCCCGTTGAACTCGATTATCCGCGGCGGAGATATTCACCTGCGGTTGGCCCTCACCCGGTCCGCCGCAGGGCACTTACCTCCTGCCTCACGAGGACGTTGCGATCCATTACGAAACGGTTAGCCAGCGATGGCTACAGGCCCGGCACCTGCCCCTTGGCATCTGGTTGCTTGTCCCACAGTAGCGGCGCTCAGTTCGGAAGGCCTGCGCCGCAACCTGGGGCTTACCGGTGCGTGGTGTGCAGCCGGGCGCGTGATGGATTCCCGCGTACACCGTCTCGGGAGAGGCTCGCCTCTCCC…	Culex quinquefasciatus isolate 02KAN 28S ribosomal RNA gene, partial sequence
HM807289	501	species	7176	Culex quinquefasciatus	7174	Culex	7157	Culicidae	2759	Eukaryota	D	AAGCATTCTGAATAGAGAGTC	1	TGGTCCGTGTTTCAAGAC	0	390	aatatcaccacgagaccgatagcgaacaagtaccgtgagggaaagttgaaaagcattctgaatagagagtcAAAAAGTACGTGAAACTGCCTAGGGCTCAAGCCCGTTGAACTCGATTATCCGCGGCGGAGATATTCACCTGCGGTTGGCCCTCACCCGGTCCGCCGCAGGGCACTTACCTCCTGCCTCACGAGGACGTTGCGATCCATTACGAAACGGTTAGCCAGCGATGGCTACAGGCCCGGCACCTGCCCCTTGGCATCTGGTTGCTTGTCCCACAGTAGCGGCGCTCAGTTCGGAAGGCCTGCGCCGCAACCTGGGGCTTACCGGTGCGTGGTGTGCAGCCGGGCGCGTGATGGATTCCCGCGTACACCGTCTCGGGAGAGGCTCGCCTCTCCC…	Culex quinquefasciatus 28S ribosomal RNA gene, partial sequence
HM802160	493	species	7176	Culex quinquefasciatus	7174	Culex	7157	Culicidae	2759	Eukaryota	D	AAGCACTCTGAATAGAGAGTC	0	GGTCCCGGTTTTCAAGAC	5	390	aatatcaccacgagaccgatagcgaacaagtaccgtgagggaaagttgaaaagcactctgaatagagagtcAAAAAGTACGTGAAACTGCCTAGGGCTCAAGCCCGTTGAACTCGATTATCCGCGGCGGAGATATTCACCTGCGGTTGGCCCTCACCCGGTCCGCCGCAGGGCACTTACCTCCTGCCTCACGAGGACGTTGCGATCCATTACGAAACGGTTAGCCAGCGATGGCTACAGGCCCGGCACCTGCCCCTTGGCATCTGGTTGCTTGTCCCACAGTAGCGGCGCTCAGTTCGGAAGGCCTGCGCCGCAACCTGGGGCTTACCGGTGCGTGGTGTGCAGCCGGGCGCGTGATGGATTCCCGCGTACACCGTCTCGGGAGAGGCTCGCCTCTCCC…	Culex quinquefasciatus isolate 10 TRI 28S ribosomal RNA gene, partial sequence
JX070789	575	species	74873	Anopheles sinensis	7164	Anopheles	7157	Culicidae	2759	Eukaryota	D	AAGCACTCTGAATAGAGAGTC	0	TTTTCCGTGTTTCAAGAC	2	450	aatacgaccatgagaccgatagtaaacaagtaccgtgtgggaaagttgaaaagcactctgaatagagagtcAAATAGTACGTGAAACTGCCGAGGGTGTAAAGCCTGTTGAACTCGATTATCCGTAGTTCCTGGCATCGTGGGTTTTGGCTGTCACGCAGAAGGGGGCCTTCTGTATGCCTTGACCCTAGCCAGGAACGAGTGCGGACATCGTGATCCATTACGCAAACCAAATGCGAGCGGCGACTCCGGTTGCTGCGAGCATATCCAACATCAGGTCCCAGAACATGCGGTCGACCCTCTAGTAGTGGCGCTCAGCTTAAGGCCGGCGTCGCGAACGGGGGATCGAGGCTCCGGTCTCGAGTTCGGCTAGTTCCGGTGTGCCGTTGGATGCGTGATG…	Anopheles sinensis isolate D2_146A 28S ribosomal RNA gene, partial sequence
KF687515	480	species	7178	Culex tritaeniorhynchus	7174	Culex	7157	Culicidae	2759	Eukaryota	D	AAGCACTCTGAATAGAGAGTC	0	TTGTCCGTGTTTCAAGGC	2	383	accacgagaccgatagcgaacaagtaccgtgagggaaagttgaaaagcactctgaatagagagtcAAAAAGTACGTGAAACTGCCTAGGGCTCAAGCCCGTTGAACTCGATTATCCGCGGCGGAGATATTCACCTGCGGCTGGCCTTCACCGGTTCACCGCAGGGCACTTACCTCCTGCCTCACGAGGACGTTGCGATCCATTACGAAACGGTTTACTCGCCATGGGTTCCAGGCCCGGCACTGGCCCCTGGCAACTGGTTGCTTGTCCCACAGTAGCGGCGCTCAGTTCGGAAGGCCTGCGCCGCAACCTGGGGCTTACCGGTGCGTGGTGTGCAGCCGGGCGCGTGATGGATTCCCGCGTACACCGTCTCGGGAGCTTGCACCCACCTCCCCCAAGG…	Culex tritaeniorhynchus 28S ribosomal RNA gene, partial sequence

## Sheet: 16S-Talaga_shared_with_D2
These are the available GenBank accessions that contain both the forward and reverse primers used by Talaga et al. 2017 to amplify 16S. They have been trimmed to include only those species that are shared with the analogous dataset for D2 (herein).
GenBank Accession	length of the original sequence	taxonomic rank	taxid	scientific name	taxid of the genus	genus	taxid of the family	family	taxid of the super kingdom	super kingdom	strand (direct or reverse)	target sequence of the first primer	number of mismatches for the first primer	target sequence of the second primer	number of mismatches for the second primer	length of the amplified fragment (excluding primers)	sequence	definition
AF034475	446	species	7159	Aedes aegypti	7158	Aedes	7157	Culicidae	2759	Eukaryota	R	TCTTAATCCAACATCGAGGTC	0	AAAGACGAGAAGACCCTATA	1	217	ctttaaacttctacacctaaaaataactcttaatccaacatcgaggtcGCAATCTTTTTTCTCGATATGAACTCTAAAAAAAAATTACGCTGTTATCCCTAAGGTAACTTAATTTTTTAATCAATATAACTGGATCAAATATTCATAAATTAATGTAAATTGAAAATAAAAGTTTTTTAAATTTTTATACCACCCCAGTAAAATTTTTTTTAAAACTATAAATTTAATTATTCTTTTTAATTTATAATTAACAAAAATAAAGATCtatagggtcttctcgtcttttaattacattttaactttttaattaaaaaa	Aedes aegypti 16S ribosomal RNA gene, mitochondrial gene for mitochondrial RNA, partial sequence
DQ397917	804	species	7159	Aedes aegypti	7158	Aedes	7157	Culicidae	2759	Eukaryota	R	TCTTAATCCAACATCGAGGTC	0	AAAGACGAGAAGACCCTATA	1	217	aaactttaaacttctacacctaaaaataactcttaatccaacatcgaggtcGCAATCTTTTTTGTCGATAAGAACTCTAAAAAAAAATTACGCTGTTATCCCTAAGGTAACTTAATTTTTTAATCAATATAACTGGATCAAATATTCATAAATTAATGTAAATTGAAAATAAAAGTTTTTTAAATTTTAATACCACCCCAGTAAAATTTTTTATTAAAATATAAATTTAATTATTCTTTTTAATTTATAATTAACAAAAATAAAGATCtatagggtcttctcgtcttttaattacattttaactttttaattaaaaaa	Aedes aegypti isolate A20 16S ribosomal RNA gene, partial sequence; mitochondrial
DQ397921	804	species	7160	Aedes albopictus	7158	Aedes	7157	Culicidae	2759	Eukaryota	R	TCTTAATCCAACATCGAGGTC	0	AAAGACGAGAAGACCCTATA	1	217	aaactttaaacttctacacctaaaaataattcttaatccaacatcgaggtcGCAATCTTTTTTGTCGATAAGAACTCTAAAAAAAAATTACGCTGTTATCCCTAAGGTAACTTAATTTTTTAATCAATAAAATTGGATCAAATATACATATATTAATGTAAACAAATAATAAAAGTTAATTAAATTTTAATACCACCCCAGTAAAATTTTTTATAAAACTATAAATTTAATTATTCTTTTTAACTTATAATTAAAAAAAATAAAGATCtatagggtcttctcgtcttttaattatattttaactttttaattaaaaaa	Aedes albopictus isolate A21 16S ribosomal RNA gene, partial sequence; mitochondrial
AF034476	457	species	7176	Culex quinquefasciatus	7174	Culex	7157	Culicidae	2759	Eukaryota	R	TCTTAATCCAACATCGAGGTC	0	AAGGACGAGAAGACCCTATA	1	217	ctttaaacttctacacctaaaaataactcttaatccaacatcgaggtcGCAATCTTTTTTCTCGATATGAACTCTAAAAAAAAATTACGCTGTAGTGCCTAAGGTAACTTAAATTTTTAATCAATAAAACTGGATCATTTATTCATATATTTATGTTAATAAATTTTAAAAGTTTTTTAAATTTTAATATCACCCCAATAAAATTTTTTATTAAATTATAAATTTTAAAATTCTTTTTAATTTATAAATAACAAAAATAAAGATCtatagggtcttctcgtcctttaatttaattttaactttttaattaaaaaa	Culex pipiens quinquefasciatus 16S ribosomal RNA gene, mitochondrial gene for mitochondrial RNA, partial sequence
DQ202300	530	species	7176	Culex quinquefasciatus	7174	Culex	7157	Culicidae	2759	Eukaryota	R	TCTTAATCCAACATCGAGGTC	0	AAGGACGAGAAGACCCTATA	1	217	aaactttaaacttctacacctaaaaataactcttaatccaacatcgaggtcGCAATCTTTTTTGTCGATATGAACTCTAAAAAAAAATTACGCTGTTATCCCTAAGGTAACTTAAATTTTTAATCAATAAAACTGGATCATTTATTCATATATTTATGTTAATAAATTTTAAAAGTTTTTTAAATTTTAATATCACCCCAATAAAATTTTTTATTAAATTATAAATTTTAAAATTCTTTTTAATTTATAAATAACAAAAATAAAGATCtatagggtcttctcgtcctttaattttattttaactttttaattaaaaaa	Culex pipiens quinquefasciatus 16S ribosomal RNA gene, partial sequence; mitochondrial
EF593017	563	species	7176	Culex quinquefasciatus	7174	Culex	7157	Culicidae	2759	Eukaryota	R	TCTTAATCCAACATCGAGGTC	0	AAGGACGAGAAGACCCTATA	1	217	cacccctaaacttctacacctaaaaataactcttaatccaacatcgaggtcGCAATCTTTTTTGTCGATATGAACTCTAAAAAAAAATTACGCTGTTATCCCTAAGGTAACTTAAATTTTTAATCAATAAAACTGGATCATTTATTCATATATTTATGTTAATAAATTTTAAAAGTTTTTTAAATTTTAATATCACCCCAATAAAATTTTTTATTAAATTATAAATTTTAAAATTCTTTTTAATTTATAAATAACAAAAATAAAGATCtatagggtcttctcgtcctttaattttattttaactttttaattaaaaaa	Culex pipiens quinquefasciatus 16S ribosomal RNA gene, partial sequence; mitochondrial
EU339128	408	species	7176	Culex quinquefasciatus	7174	Culex	7157	Culicidae	2759	Eukaryota	R	TCTTAATCCAACATCGAGGTC	0	AAGGACGAGAAGACCCTATA	1	217	aaactttaaacttctacacctaaaaataactcttaatccaacatcgaggtcGCAATCTTTTTTGTCGATATGAACTCTAAAAAAAAATTACGCTGTTATCCCTAAGGTAACTTAAATTTTTAATCAATAAAACTGGATCATTTATTCATATATTTATGTTAATAAATTTTAAAAGTTTTTTAAATTTTAATATCACCCCAATAAAATTTTTTATTAAATTATAAATTTTAAAATTCTTTTTAATTTATAAATAACAAAAATAAAGATCtatagggtcttctcgtcctttaattttattttaactttttaattaaaaaa	Culex quinquefasciatus isolate A187 16S ribosomal RNA gene, partial sequence; mitochondrial
EU339129	365	species	7176	Culex quinquefasciatus	7174	Culex	7157	Culicidae	2759	Eukaryota	R	TCTTAATCCAACATCGAGGTC	0	AAGGACGAGAAGACCCTATA	1	217	aaactttaaacttctacacctaaaaataactcttaatccaacatcgaggtcGCAATCTTTTTTGTCGATATGAACTCTAAAAAAAAATTACGCTGTTATCCCTAAGGTAACTTAAATTTTTAATCAATAAAACTGGATCATTTATTCATATATTTATGTTAATAAATTTTAAAAGTTTTTTAAATTTTAATATCACCCCAATAAAATTTTTTATTAAATTATAAATTTTAAAATTCTTTTTAATTTATAAATAACAAAAATAAAGATCtatagggtcttctcgtcctttaattttattttaactttttaattaaaaaa	Culex quinquefasciatus isolate A15 16S ribosomal RNA gene, partial sequence; mitochondrial
EU339132	333	species	7176	Culex quinquefasciatus	7174	Culex	7157	Culicidae	2759	Eukaryota	R	TCTTAATCCAACATCGAGGTC	0	AAGGACGAGAAGACCCTATA	1	217	aaactttaaacttctacacctaaaaataactcttaatccaacatcgaggtcGCAATCTTTTTTGTCGATATGAACTCTAAAAAAAAATTACGCTGTTATCCCTAAGGTAACTTAAATTTTTAATCAATAAAACTGGATCATTTATTCATATATTTATGTTAATAAATTTTAAAAGTTTTTTAAATTTTAATATCACCCCAATAAAATTTTTTATTAAATTATAAATTTTAAAATTCTTTTTAATTTATAAATAACAAAAATAAAGATCtatagggtcttctcgtcctttaattttattttaactttttaa	Culex quinquefasciatus isolate A36 16S ribosomal RNA gene, partial sequence; mitochondrial
EU339134	451	species	7176	Culex quinquefasciatus	7174	Culex	7157	Culicidae	2759	Eukaryota	R	TCTTAATCCAACATCGAGGTC	0	AAGGACGAGAAGACCCTATA	1	217	aaactttaaacttctacacctaaaaataactcttaatccaacatcgaggtcGCAATCTTTTTTGTCGATATGAACTCTAAAAAAAAATTACGCTGTTATCCCTAAGGTAACTTAAATTTTTAATCAATAAAACTGGATCATTTATTCATATATTTATGTTAATAAATTTTAAAAGTTTTTTAAATTTTAATATCACCCCAATAAAATTTTTTATTAAATTATAAATTTTAAAATTCTTTTTAATTTATAAATAACAAAAATAAAGATCtatagggtcttctcgtcctttaattttattttaactttttaattaaaaaa	Culex quinquefasciatus isolate A144 16S ribosomal RNA gene, partial sequence; mitochondrial
EU339135	473	species	7176	Culex quinquefasciatus	7174	Culex	7157	Culicidae	2759	Eukaryota	R	TCTTAATCCAACATCGAGGTC	0	AAGGACGAGAAGACCCTATA	1	217	aaactttaaacttctacacctaaaaataactcttaatccaacatcgaggtcGCAATCTTTTTTGTCGATATGAACTCTAAAAAAAAATTACGCTGTTATCCCTAAGGTAACTTAAATTTTTAATCAATAAAACTGGATCATTTATTCATATATTTATGTTAATAAATTTTAAAAGTTTTTTAAATTTTAATATCACCCCAATAAAATTTTTTATTAAATTATAAATTTTAAAATTCTTTTTAATTTATAAATAACAAAAATAAAGATCtatagggtcttctcgtcctttaattttattttaactttttaattaaaaaa	Culex quinquefasciatus isolate A190 16S ribosomal RNA gene, partial sequence; mitochondrial
EU339137	433	species	7176	Culex quinquefasciatus	7174	Culex	7157	Culicidae	2759	Eukaryota	R	TCTTAATCCAACATCGAGGTC	0	AAGGACGAGAAGACCCTATA	1	217	aaactttaaacttctacacctaaaaataactcttaatccaacatcgaggtcGCAATCTTTTTTGTCGATATGAACTCTAAAAAAAAATTACGCTGTTATCCCTAAGGTAACTTAAATTTTTAATCAATAAAACTGGATCATTTATTCATATATTTATGTTAATAAATTTTAAAAGTTTTTTAAATTTTAATATCACCCCAATAAAATTTTTTATTAAATTATAAATTTTAAAATTCTTTTTAATTTATAAATAACAAAAATAAAGATCtatagggtcttctcgtcctttaattttattttaactttttaattaaaaaa	Culex quinquefasciatus isolate A7 16S ribosomal RNA gene, partial sequence; mitochondrial
EU339138	442	species	7176	Culex quinquefasciatus	7174	Culex	7157	Culicidae	2759	Eukaryota	R	TCTTAATCCAACATCGAGGTC	0	AAGGACGAGAAGACCCTATA	1	217	aaactttaaacttctacacctaaaaataactcttaatccaacatcgaggtcGCAATCTTTTTTGTCGATATGAACTCTAAAAAAAAATTACGCTGTTATCCCTAAGGTAACTTAAATTTTTAATCAATAAAACTGGATCATTTATTCATATATTTATGTTAATAAATTTTAAAAGTTTTTTAAATTTTAATATCACCCCAATAAAATTTTTTATTAAATTATAAATTTTAAAATTCTTTTTAATTTATAAATAACAAAAATAAAGATCtatagggtcttctcgtcctttaattttattttaactttttaattaaaaaa	Culex quinquefasciatus isolate A22 16S ribosomal RNA gene, partial sequence; mitochondrial
EU339139	367	species	7176	Culex quinquefasciatus	7174	Culex	7157	Culicidae	2759	Eukaryota	R	TCTTAATCCAACATCGAGGTC	0	AAGGACGAGAAGACCCTATA	1	217	actcttaatccaacatcgaggtcGCAATCTTTTTTGTCGATATGAACTCTAAAAAAAAATTACGCTGTTATCCCTAAGGTAACTTAAATTTTTAATCAATAAAACTGGATCATTTATTCATATATTTATGTTAATAAATTTTAAAAGTTTTTTAAATTTTAATATCACCCCAATAAAATTTTTTATTAAATTATAAATTTTAAAATTCTTTTTAATTTATAAATAACAAAAATAAAGATCtatagggtcttctcgtcctttaattttattttaactttttaattaaaaaa	Culex quinquefasciatus isolate A4 16S ribosomal RNA gene, partial sequence; mitochondrial
EU339140	393	species	7176	Culex quinquefasciatus	7174	Culex	7157	Culicidae	2759	Eukaryota	R	TCTTAATCCAACATCGAGGTC	0	AAGGACGAGAAGACCCTATA	1	217	aaactttaaacttctacacctaaaaataactcttaatccaacatcgaggtcGCAATCTTTTTTGTCGATATGAACTCTAAAAAAAAATTACGCTGTTATCCCTAAGGTAACTTAAATTTTTAATCAATAAAACTGGATCATTTATTCATATATTTATGTTAATAAATTTTAAAAGTTTTTTAAATTTTAATATCACCCCAATAAAATTTTTTATTAAATTATAAATTTTAAAATTCTTTTTAATTTATAAATAACAAAAATAAAGATCtatagggtcttctcgtcctttaattttattttaactttttaattaaaaaa	Culex quinquefasciatus isolate A181 16S ribosomal RNA gene, partial sequence; mitochondrial
EU339141	440	species	7176	Culex quinquefasciatus	7174	Culex	7157	Culicidae	2759	Eukaryota	R	TCTTAATCCAACATCGAGGTC	0	AAGGACGAGAAGACCCTATA	1	217	aaactttaaacttctacacctaaaaataactcttaatccaacatcgaggtcGCAATCTTTTTTGTCGATATGAACTCTAAAAAAAAATTACGCTGTTATCCCTAAGGTAACTTAAATTTTTAATCAATAAAACTGGATCATTTATTCATATATTTATGTTAATAAATTTTAAAAGTTTTTTAAATTTTAATATCACCCCAATAAAATTTTTTATTAAATTATAAATTTTAAAATTCTTTTTAATTTATAAATAACAAAAATAAAGATCtatagggtcttctcgtcctttaattttattttaactttttaattaaaaaa	Culex quinquefasciatus isolate A160 16S ribosomal RNA gene, partial sequence; mitochondrial
EU339143	435	species	7176	Culex quinquefasciatus	7174	Culex	7157	Culicidae	2759	Eukaryota	R	TCTTAATCCAACATCGAGGTC	0	AAGGACGAGAAGACCCTATA	1	217	aaactttaaacttctacacctaaaaataactcttaatccaacatcgaggtcGCAATCTTTTTTGTCGATATGAACTCTAAAAAAAAATTACGCTGTTATCCCTAAGGTAACTTAAATTTTTAATCAATAAAACTGGATCATTTATTCATATATTTATGTTAATAAATTTTAAAAGTTTTTTAAATTTTAATATCACCCCAATAAAATTTTTTATTAAATTATAAATTTTAAAATTCTTTTTAATTTATAAATAACAAAAATAAAGATCtatagggtcttctcgtcctttaattttattttaactttttaattaaaaaa	Culex quinquefasciatus isolate A16 16S ribosomal RNA gene, partial sequence; mitochondrial
EU339146	472	species	7176	Culex quinquefasciatus	7174	Culex	7157	Culicidae	2759	Eukaryota	R	TCTTAATCCAACATCGAGGTC	0	AAGGACGAGAAGACCCTATA	1	217	aaactttaaacttctacacctaaaaataactcttaatccaacatcgaggtcGCAATCTTTTTTGTCGATATGAACTCTAAAAAAAAATTACGCTGTTATCCCTAAGGTAACTTAAATTTTTAATCAATAAAACTGGATCATTTATTCATATATTTATGTTAATAAATTTTAAAAGTTTTTTAAATTTTAATATCACCCCAATAAAATTTTTTATTAAATTATAAATTTTAAAATTCTTTTTAATTTATAAATAACAAAAATAAAGATCtatagggtcttctcgtcctttaattttattttaactttttaattaaaaaa	Culex quinquefasciatus isolate A12 16S ribosomal RNA gene, partial sequence; mitochondrial
EU555413	532	species	7176	Culex quinquefasciatus	7174	Culex	7157	Culicidae	2759	Eukaryota	R	TCTTAATCCAACATCGAGGTC	0	AAGGACGAGAAGACCCTATA	1	217	aaactttaaacttctacacctaaaaataactcttaatccaacatcgaggtcGCAATCTTTTTTGTCGATATGAACTCTAAAAAAAAATTACGCTGTTATCCCTAAGGTAACTTAAATTTTTAATCAATAAAACTGGATCATTTATTCATATATTTATGTTAATAAATTTTAAAAGTTTTTTAAATTTTAATATCACCCCAATAAAATTTTTTATTAAATTATAAATTTTAAAATTCTTTTTAATTTATAAATAACAAAAATAAAGATCtatagggtcttctcgtcctttaattttattttaactttttaattaaaaaa	Culex quinquefasciatus from India: Bhatinda 16S ribosomal RNA gene, partial sequence; mitochondrial
EU555414	530	species	7176	Culex quinquefasciatus	7174	Culex	7157	Culicidae	2759	Eukaryota	R	TCTTAATCCAACATCGAGGTC	0	AAGGACGAGAAGACCCTATA	1	217	aaactttaaacttctacacctaaaaataactcttaatccaacatcgaggtcGCAATCTTTTTTGTCGATATGAACTCTAAAAAAAAATTACGCTGTTATCCCTAAGGTAACTTAAATTTTTAATCAATAAAACTGGATCATTTATTCATATATTTATGTTAATAAATTTTAAAAGTTTTTTAAATTTTAATATCACCCCAATAAAATTTTTTATTAAATTATAAATTTTAAAATTCTTTTTAATTTATAAATAACAAAAATAAAGATCtatagggtcttctcgtcctttaattttattttaactttttaattaaaaaa	Culex quinquefasciatus from India: Bikaner 16S ribosomal RNA gene, partial sequence; mitochondrial
EU555415	531	species	7176	Culex quinquefasciatus	7174	Culex	7157	Culicidae	2759	Eukaryota	R	TCTTAATCCAACATCGAGGTC	0	AAGGACGAGAAGACCCTATA	1	217	aaactttaaacttctacacctaaaaataactcttaatccaacatcgaggtcGCAATCTTTTTTGTCGATATGAACTCTAAAAAAAAATTACGCTGTTATCCCTAAGGTAACTTAAATTTTTAATCAATAAAACTGGATCATTTATTCATATATTTATGTTAATAAATTTTAAAAGTTTTTTAAATTTTAATATCACCCCAATAAAATTTTTTATTAAATTATAAATTTTAAAATTCTTTTTAATTTATAAATAACAAAAATAAAGATCtatagggtcttctcgtcctttaattttattttaactttttaattaaaaaa	Culex quinquefasciatus from India: Jodhpur 16S ribosomal RNA gene, partial sequence; mitochondrial
EU555416	533	species	7176	Culex quinquefasciatus	7174	Culex	7157	Culicidae	2759	Eukaryota	R	TCTTAATCCAACATCGAGGTC	0	AAGGACGAGAAGACCCTATA	1	217	aaactttaaacttctacacctaaaaataactcttaatccaacatcgaggtcGCAATCTTTTTTGTCGATATGAACTCTAAAAAAAAATTACGCTGTTATCCCTAAGGTAACTTAAATTTTTAATCAATAAAACTGGATCATTTATTCATATATTTATGTTAATAAATTTTAAAAGTTTTTTAAATTTTAATATCACCCCAATAAAATTTTTTATTAAATTATAAATTTTAAAATTCTTTTTAATTTATAAATAACAAAAATAAAGATCtatagggtcttctcgtcctttaattttattttaactttttaattaaaaaa	Culex quinquefasciatus from India: Jamnagar 16S ribosomal RNA gene, partial sequence; mitochondrial
EU711082	491	species	7176	Culex quinquefasciatus	7174	Culex	7157	Culicidae	2759	Eukaryota	R	TCTTAATCCAACATCGAGGTC	0	AAGGACGAGAAGACCCTATA	1	217	aaactttaaacttctacacctaaaaataactcttaatccaacatcgaggtcGCAATCTTTTTTGTCGATATGAACTCTAAAAAAAAATTACGCTGTTATCCCTAAGGTAACTTAAATTTTTAATCAATAAAACTGGATCATTTATTCATATATTTATGTTAATAAATTTTAAAAGTTTTTTAAATTTTAATATCACCCCAATAAAATTTTTTATTAAATTATAAATTTTAAAATTCTTTTTAATTTATAAATAACAAAAATAAAGATCtatagggtcttctcgtcctttaattttattttaactttttaattaaaaaa	Culex quinquefasciatus isolate A-35 16S ribosomal RNA gene, partial sequence; mitochondrial
EU711083	485	species	7176	Culex quinquefasciatus	7174	Culex	7157	Culicidae	2759	Eukaryota	R	TCTTAATCCAACATCGAGGTC	0	AAGGACGAGAAGACCCTATA	1	217	aaactttaaacttctacacctaaaaataactcttaatccaacatcgaggtcGCAATCTTTTTTGTCGATATGAACTCTAAAAAAAAATTACGCTGTTATCCCTAAGGTAACTTAAATTTTTAATCAATAAAACTGGATCATTTATTCATATATTTATGTTAATAAATTTTAAAAGTTTTTTAAATTTTAATATCACCCCAATAAAATTTTTTATTAAATTATAAATTTTAAAATTCTTTTTAATTTATAAATAACAAAAATAAAGATCtatagggtcttctcgtcctttaattttattttaactttttaattaaaaaa	Culex quinquefasciatus isolate A-40 16S ribosomal RNA gene, partial sequence; mitochondrial
EU711084	450	species	7176	Culex quinquefasciatus	7174	Culex	7157	Culicidae	2759	Eukaryota	R	TCTTAATCCAACATCGAGGTC	0	AAGGACGAGAAGACCCTATA	1	217	aaactttaaacttctacacctaaaaataactcttaatccaacatcgaggtcGCAATCTTTTTTGTCGATATGAACTCTAAAAAAAAATTACGCTGTTATCCCTAAGGTAACTTAAATTTTTAATCAATAAAACTGGATCATTTATTCATATATTTATGTTAATAAATTTTAAAAGTTTTTTAAATTTTAATATCACCCCAATAAAATTTTTTATTAAATTATAAATTTTAAAATTCTTTTTAATTTATAAATAACAAAAATAAAGATCtatagggtcttctcgtcctttaattttattttaactttttaattaaaaaa	Culex quinquefasciatus isolate A-52 16S ribosomal RNA gene, partial sequence; mitochondrial
EU711085	491	species	7176	Culex quinquefasciatus	7174	Culex	7157	Culicidae	2759	Eukaryota	R	TCTTAATCCAACATCGAGGTC	0	AAGGACGAGAAGACCCTATA	1	217	aaactttaaacttctacacctaaaaataactcttaatccaacatcgaggtcGCAATCTTTTTTGTCGATATGAACTCTAAAAAAAAATTACGCTGTTATCCCTAAGGTAACTTAAATTTTTAATCAATAAAACTGGATCATTTATTCATATATTTATGTTAATAAATTTTAAAAGTTTTTTAAATTTTAATATCACCCCAATAAAATTTTTTATTAAATTATAAATTTTAAAATTCTTTTTAATTTATAAATAACAAAAATAAAGATCtatagggtcttctcgtcctttaattttattttaactttttaattaaaaaa	Culex quinquefasciatus isolate A-59 16S ribosomal RNA gene, partial sequence; mitochondrial
EU711086	471	species	7176	Culex quinquefasciatus	7174	Culex	7157	Culicidae	2759	Eukaryota	R	TCTTAATCCAACATCGAGGTC	0	AAGGACGAGAAGACCCTATA	1	217	aaactttaaacttctacacctaaaaataactcttaatccaacatcgaggtcGCAATCTTTTTTGTCGATATGAACTCTAAAAAAAAATTACGCTGTTATCCCTAAGGTAACTTAAATTTTTAATCAATAAAACTGGATCATTTATTCATATATTTATGTTAATAAATTTTAAAAGTTTTTTAAATTTTAATATCACCCCAATAAAATTTTTTATTAAATTATAAATTTTAAAATTCTTTTTAATTTATAAATAACAAAAATAAAGATCtatagggtcttctcgtcctttaattttattttaactttttaattaaaaaa	Culex quinquefasciatus isolate A-66 16S ribosomal RNA gene, partial sequence; mitochondrial
EU711087	491	species	7176	Culex quinquefasciatus	7174	Culex	7157	Culicidae	2759	Eukaryota	R	TCTTAATCCAACATCGAGGTC	0	AAGGACGAGAAGACCCTATA	1	217	aaactttaaacttctacacctaaaaataactcttaatccaacatcgaggtcGCAATCTTTTTTGTCGATATGAACTCTAAAAAAAAATTACGCTGTTATCCCTAAGGTAACTTAAATTTTTAATCAATAAAACTGGATCATTTATTCATATATTTATGTTAATAAATTTTAAAAGTTTTTTAAATTTTAATATCACCCCAATAAAATTTTTTATTAAATTATAAATTTTAAAATTCTTTTTAATTTATAAATAACAAAAATAAAGATCtatagggtcttctcgtcctttaattttattttaactttttaattaaaaaa	Culex quinquefasciatus isolate A-84 16S ribosomal RNA gene, partial sequence; mitochondrial
EU711088	490	species	7176	Culex quinquefasciatus	7174	Culex	7157	Culicidae	2759	Eukaryota	R	TCTTAATCCAACATCGAGGTC	0	AAGGACGAGAAGACCCTATA	1	217	aaactttaaacttctacacctaaaaataactcttaatccaacatcgaggtcGCAATCTTTTTTGTCGATATGAACTCTAAAAAAAAATTACGCTGTTATCCCTAAGGTAACTTAAATTTTTAATCAATAAAACTGGATCATTTATTCATATATTTATGTTAATAAATTTTAAAAGTTTTTTAAATTTTAATATCACCCCAATAAAATTTTTTATTAAATTATAAATTTTAAAATTCTTTTTAATTTATAAATAACAAAAATAAAGATCtatagggtcttctcgtcctttaattttattttaactttttaattaaaaaa	Culex quinquefasciatus isolate A-128 16S ribosomal RNA gene, partial sequence; mitochondrial
EU711089	491	species	7176	Culex quinquefasciatus	7174	Culex	7157	Culicidae	2759	Eukaryota	R	TCTTAATCCAACATCGAGGTC	0	AAGGACGAGAAGACCCTATA	1	217	aaactttaaacttctacacctaaaaataactcttaatccaacatcgaggtcGCAATCTTTTTTGTCGATATGAACTCTAAAAAAAAATTACGCTGTTATCCCTAAGGTAACTTAAATTTTTAATCAATAAAACTGGATCATTTATTCATATATTTATGTTAATAAATTTTAAAAGTTTTTTAAATTTTAATATCACCCCAATAAAATTTTTTATTAAATTATAAATTTTAAAATTCTTTCTCATTTATAAATAACAAAAATAAAGATCtatagggtcttctcgtcctttaattttattttaactttttcactcacaaa	Culex quinquefasciatus isolate A-131 16S ribosomal RNA gene, partial sequence; mitochondrial
EU711090	459	species	7176	Culex quinquefasciatus	7174	Culex	7157	Culicidae	2759	Eukaryota	R	TCTTAATCCAACATCGAGGTC	0	AAGGACGAGAAGACCCTATA	1	217	aaactttaaacttctacacctaaaaataactcttaatccaacatcgaggtcGCAATCTTTTTTGTCGATATGAACTCTAAAAAAAAATTACGCTGTTATCCCTAAGGTAACTTAAATTTTTAATCAATAAAACTGGATCATTTATTCATATATTTATGTTAATAAATTTTAAAAGTTTTTTAAATTTTAATATCACCCCAATAAAATTTTTTATTAAATTATAAATTTTAAAATTCTTTTTAATTTATAAATAACAAAAATAAAGATCtatagggtcttctcgtcctttaattttattttaactttttaattaaaaaa	Culex quinquefasciatus isolate A-137 16S ribosomal RNA gene, partial sequence; mitochondrial
EU711091	491	species	7176	Culex quinquefasciatus	7174	Culex	7157	Culicidae	2759	Eukaryota	R	TCTTAATCCAACATCGAGGTC	0	AAGGACGAGAAGACCCTATA	1	217	aaactttaaacttctacacctaaaaataactcttaatccaacatcgaggtcGCAATCTTTTTTGTCGATATGAACTCTAAAAAAAAATTACGCTGTTATCCCTAAGGTAACTTAAATTTTTAATCAATAAAACTGGATCATTTATTCATATATTTATGTTAATAAATTTTAAAAGTTTTTTAAATTTTAATATCACCCCAATAAAATTTTTTATTAAATTATAAATTTTAAAATTCTTTTTAATTTATAAATAACAAAAATAAAGATCtatagggtcttctcgtcctttaattttattttaactttttaattaaaaaa	Culex quinquefasciatus isolate A-169 16S ribosomal RNA gene, partial sequence; mitochondrial
EU711092	487	species	7176	Culex quinquefasciatus	7174	Culex	7157	Culicidae	2759	Eukaryota	R	TCTTAATCCAACATCGAGGTC	0	AAGGACGAGAAGACCCTATA	1	217	aaactttaaacttctacacctaaaaataactcttaatccaacatcgaggtcGCAATCTTTTTTGTCGATATGAACTCTAAAAAAAAATTACGCTGTTATCCCTAAGGTAACTTAAATTTTTAATCAATAAAACTGGATCATTTATTCATATATTTATGTTAATAAATTTTAAAAGTTTTTTAAATTTTAATATCACCCCAATAAAATTTTTTATTAAATTATAAATTTTAAAATTCTTTTTAATTTATAAATAACAAAAATAAAGATCtatagggtcttctcgtcctttaattttattttaactttttaattaaaaaa	Culex quinquefasciatus isolate A-173 16S ribosomal RNA gene, partial sequence; mitochondrial
EU711093	490	species	7176	Culex quinquefasciatus	7174	Culex	7157	Culicidae	2759	Eukaryota	R	TCTTAATCCAACATCGAGGTC	0	AAGGACGAGAAGACCCTATA	1	217	aaactttaaacttctacacctaaaaataactcttaatccaacatcgaggtcGCAATCTTTTTTGTCGATATGAACTCTAAAAAAAAATTACGCTGTTATCCCTAAGGTAACTTAAATTTTTAATCAATAAAACTGGATCATTTATTCATATATTTATGTTAATAAATTTTAAAAGTTTTTTAAATTTTAATATCACCCCAATAAAATTTTTTATTAAATTATAAATTTTAAAATTCTTTTTAATTTATAAATAACAAAAATAAAGATCtatagggtcttctcgtcctttaattttattttaactttttaattaaaaaa	Culex quinquefasciatus isolate A-177 16S ribosomal RNA gene, partial sequence; mitochondrial
EU711094	488	species	7176	Culex quinquefasciatus	7174	Culex	7157	Culicidae	2759	Eukaryota	R	TCTTAATCCAACATCGAGGTC	0	AAGGACGAGAAGACCCTATA	1	217	aaactttaaacttctacacctaaaaataactcttaatccaacatcgaggtcGCAATCTTTTTTGTCGATATGAACTCTAAAAAAAAATTACGCTGTTATCCCTAAGGTAACTTAAATTTTTAATCAATAAAACTGGATCATTTATTCATATATTTATGTTAATAAATTTTAAAAGTTTTTTAAATTTTAATATCACCCCAATAAAATTTTTTATTAAATTATAAATTTTAAAATTCTTTTTAATTTATAAATAACAAAAATAAAGATCtatagggtcttctcgtcctttaattttattttaactttttaattaaaaaa	Culex quinquefasciatus isolate A-263 16S ribosomal RNA gene, partial sequence; mitochondrial
EU711095	460	species	7176	Culex quinquefasciatus	7174	Culex	7157	Culicidae	2759	Eukaryota	R	TCTTAATCCAACATCGAGGTC	0	AAGGACGAGAAGACCCTATA	1	217	aaactttaaacttctacacctaaaaataactcttaatccaacatcgaggtcGCAATCTTTTTTGTCGATATGAACTCTAAAAAAAAATTACGCTGTTATCCCTAAGGTAACTTAAATTTTTAATCAATAAAACTGGATCATTTATTCATATATTTATGTTAATAAATTTTAAAAGTTTTTTAAATTTTAATATCACCCCAATAAAATTTTTTATTAAATTATAAATTTTAAAATTCTTTTTAATTTATAAATAACAAAAATAAAGATCtatagggtcttctcgtcctttaattttattttaactttttaattaaaaaa	Culex quinquefasciatus isolate A-266 16S ribosomal RNA gene, partial sequence; mitochondrial
EU711096	434	species	7176	Culex quinquefasciatus	7174	Culex	7157	Culicidae	2759	Eukaryota	R	TCTTAATCCAACATCGAGGTC	0	AAGGACGAGAAGACCCTATA	1	217	aaactttaaacttctacacctaaaaataactcttaatccaacatcgaggtcGCAATCTTTTTTGTCGATATGAACTCTAAAAAAAAATTACGCTGTTATCCCTAAGGTAACTTAATTTTTTAATCAATAAAACTGGATCATTTATTCATATATTTATGTTAATAAATTTTAAAAGTTTTTTAAATTTTAATATCACCCCAATAAAATTTTTTATTAAATTATAAATTTTAAAATTCTTTTTAATTTATAAATAACAAAAATAAAGATCtatagggtcttctcgtcctttaattttattttaactttttaattaaaaaa	Culex quinquefasciatus isolate A-267 16S ribosomal RNA gene, partial sequence; mitochondrial
EU711097	460	species	7176	Culex quinquefasciatus	7174	Culex	7157	Culicidae	2759	Eukaryota	R	TCTTAATCCAACATCGAGGTC	0	AAGGACGAGAAGACCCTATA	1	217	aaactttaaacttctacacctaaaaataactcttaatccaacatcgaggtcGCAATCTTTTTTGTCGATATGAACTCTAAAAAAAAATTACGCTGTTATCCCTAAGGTAACTTAATTTTTTAATCAATAAAACTGGATCATTTATTCATATATTTATGTTAATAAATTTTAAAAGTTTTTTAAATTTTAATATCACCCCAATAAAATTTTTTATTAAATTATAAATTTTAAAATTCTTTTTAATTTATAAATAACAAAAATAAAGATCtatagggtcttctcgtcctttaattttattttaactttttaattaaaaaa	Culex quinquefasciatus isolate A-270 16S ribosomal RNA gene, partial sequence; mitochondrial
EU711098	481	species	7176	Culex quinquefasciatus	7174	Culex	7157	Culicidae	2759	Eukaryota	R	TCTTAATCCAACATCGAGGTC	0	AAGGACGAGAAGACCCTATA	1	217	aaactttaaacttctacacctaaaaataactcttaatccaacatcgaggtcGCAATCTTTTTTGTCGATATGAACTCTAAAAAAAAATTACGCTGTTATCCCTAAGGTAACTTAAATTTTTAATCAATAAAACTGGATCATTTATTCATATATTTATGTTAATAAATTTTAAAAGTTTTTTAAATTTTAATATCACCCCAATAAAATTTTTTATTAAATTATAAATTTTAAAATTCTTTTTAATTTATAAATAACAAAAATAAAGATCtatagggtcttctcgtcctttaattttattttaactttttaattaaaaaa	Culex quinquefasciatus isolate A-274 16S ribosomal RNA gene, partial sequence; mitochondrial
EU711099	461	species	7176	Culex quinquefasciatus	7174	Culex	7157	Culicidae	2759	Eukaryota	R	TCTTAATCCAACATCGAGGTC	0	AAGGACGAGAAGACCCTATA	1	217	aaactttaaacttctacacctaaaaataactcttaatccaacatcgaggtcGCAATCTTTTTTGTCGATATGAACTCTAAAAAAAAATTACGCTGTTATCCCTAAGGTAACTTAAATTTTTAATCAATAAAACTGGATCATTTATTCATATATTTATGTTAATAAATTTTAAAAGTTTTTTAAATTTTAATATCACCCCAATAAAATTTTTTATTAAATTATAAATTTTAAAATTCTTTTTAATTTATAAATAACAAAAATAAAGATCtatagggtcttctcgtcctttaattttattttaactttttaattaaaaaa	Culex quinquefasciatus isolate A-365 16S ribosomal RNA gene, partial sequence; mitochondrial
EU711100	461	species	7176	Culex quinquefasciatus	7174	Culex	7157	Culicidae	2759	Eukaryota	R	TCTTAATCCAACATCGAGGTC	0	AAGGACGAGAAGACCCTATA	1	217	aaactttaaacttctacacctaaaaataactcttaatccaacatcgaggtcGCAATCTTTTTTGTCGATATGAACTCTAAAAAAAAATTACGCTGTTATCCCTAAGGTAACTTAAATTTTTAATCAATAAAACTGGATCATTTATTCATATATTTATGTTAATAAATTTTAAAAGTTTTTTAAATTTTAATATCACCCCAATAAAATTTTTTATTAAATTATAAATTTTAAAATTCTTTTTAATTTATAAATAACAAAAATAAAGATCtatagggtcttctcgtcctttaattttattttaactttttaattaaaaaa	Culex quinquefasciatus isolate A-368 16S ribosomal RNA gene, partial sequence; mitochondrial
EU711101	461	species	7176	Culex quinquefasciatus	7174	Culex	7157	Culicidae	2759	Eukaryota	R	TCTTAATCCAACATCGAGGTC	0	AAGGACGAGAAGACCCTATA	1	217	aaactttaaacttctacacctaaaaataactcttaatccaacatcgaggtcGCAATCTTTTTTGTCGATATGAACTCTAAAAAAAAATTACGCTGTTATCCCTAAGGTAACTTAAATTTTTAATCAATAAAACTGGATCATTTATTCATATATTTATGTTAATAAATTTTAAAAGTTTTTTAAATTTTAATATCACCCCAATAAAATTTTTTATTAAATTATAAATTTTAAAATTCTTTTTAATTTATAAATAACAAAAATAAAGATCtatagggtcttctcgtcctttaattttattttaactttttaattaaaaaa	Culex quinquefasciatus isolate A-373 16S ribosomal RNA gene, partial sequence; mitochondrial
AF034469	457	species	7178	Culex tritaeniorhynchus	7174	Culex	7157	Culicidae	2759	Eukaryota	R	TCTTAATCCAACATCGAGGTC	0	AAGGACGAGAAGACCCTATA	1	217	ctttaaacttgtacacctaaaaataactcttaatccaacatcgaggtcGCAATCTTTTTTCTCGATATGAACTCTAAAAAAAAATTACGCTGTTATCCCTAAGGTAACTTAATTTTTTAATCAATAAAACTGGATCATTTATTCATATATTTATGTTAATAAATTTTAAAAGTTTTTTAAATTTTAATATCACCCCAATAAAATTTTTTATTAAATTATAAATTTTAAAATTCTTTTTAATTTATAAATAACAAAAATAAAGATCtatagggtcttctcgtcctttaattttattttaactttttaattaaaaaa	Culex tritaeniorhynchus 16S ribosomal RNA gene, mitochondrial gene for mitochondrial RNA, partial sequence
EF593020	549	species	7178	Culex tritaeniorhynchus	7174	Culex	7157	Culicidae	2759	Eukaryota	R	TCTTAATCCAACATCGAGGTC	0	AAGGACGAGAAGACCCTATA	1	217	aaactttaaacttctacacctaaaaataactcttaatccaacatcgaggtcGCAATCTTTTTTGTCGATATGAACTCTAAAAAAAAATTACGCTGTTATCCCTAAGGTAACTTAATTTTTTAATCAATAAAACTGGATCATTTATTCATATATTTATGTTAATAAATTTTAAAAGTTTTTTAAATTTTAATATCACCCCAATAAAATTTTTTATTAAATTATAAATTTTAAAATTCTTTTTAATTTATAAATAACAAAAATAAAGATCtatagggtcttctcgtcctttaattttattttaactttttaattaaaaaa	Culex tritaeniorhynchus 16S ribosomal RNA gene, partial sequence; mitochondrial
AF034467	429	species	30069	Anopheles stephensi	7164	Anopheles	7157	Culicidae	2759	Eukaryota	R	TCTTAATCCAACATCGAGGTC	0	AAAGACGAGAAGACCCTATA	1	208	cacctaaaaataactcttaatccaacatcgaggtcGCAATCTTTTTATCGATAAGAACTCTCTAAAAAAATTACGTGTATCCCTAAGGTAACTTAAATTTTTAATCATAAAATAGGATCTTTTATTCATAAATTTATGTTAATAAATAATAAAAGTTAATTTAATTTTAATACCACCCCAGTAAAATTTTTTATTATATAATTATTAAAATTCATAAATTATAATTTTATAAAAATAAAGATCtatagggtcttctcgtcttttaattatattttaactttttaattaaaaaa	Anopheles stephensi 16S ribosomal RNA gene, mitochondrial gene for mitochondrial RNA, partial sequence
DQ202295	503	species	30069	Anopheles stephensi	7164	Anopheles	7157	Culicidae	2759	Eukaryota	R	TCTTAATCCAACATCGAGGTC	0	AAAGACGAGAAGACCCTATA	1	216	aaactttaaacttctacacctaaaaataactcttaatccaacatcgaggtcGCAATCTTTTTTATCGATATGAACTCTCTAAAAAAATTACGCTGTTATCCCTAAGGTAACTTAAATTTTTAATCCATAAAATAGGATCTTTTATTCATAAATTTATGTAAATAAATAATAAAAGTTAATTTAATTTTAATACCACCCCAGTAAAATTTTATCTAAAATATAATTATTAAAATTCTTTATAAATTATAATTTATAAAAATAAAGATCtatagggtcttctcgtcttttaattatattttaactttttaattaaaaaa	Anopheles stephensi 16S ribosomal RNA gene, partial sequence; mitochondrial
DQ202298	463	species	74869	Anopheles maculatus	7164	Anopheles	7157	Culicidae	2759	Eukaryota	R	TCTTAATCCAACATTGAGGTC	1	AAAGACGAGAAGACCCTATA	1	213	cctaaaaataactcttaatccaacattgaggtcCAATTTTTTTATCGATGTGAACTCTCTAAAAAAATTACGCTGTTATCCTAAGGTAACTTAAATTTTTAATCCATAATAAAGGATCTTTTATTCATAAATTAATGTAAATAAATAATAAAAGTTAATTTAATTTTAATACCACCCCAGTAAAATTTTATTTAAAATATAATTTTTAAAATTCTTTATAAATTATAATTTATAAAAATAAAGATCtatagggtcttctcgtcttttaattatattttaactttttaattaaaaaa	Anopheles maculatus 16S ribosomal RNA gene, partial sequence; mitochondrial
AF373609	515	species	74873	Anopheles sinensis	7164	Anopheles	7157	Culicidae	2759	Eukaryota	D	TTTTAATTCAACATCGAGGTC	2	TGGGACGATAAGACCCTATA	1	218	taccagctagacggctacacctaactgaaattttaattcaacatcgaggtcGCAACTACTCTTGTCGATAAGAACTCTCAAAGAAAATCACGCTGTTATCCCTAAAGTAACTTATACTTTTAATCCACAAAGAAGGATCACACACTAATTATAATTATTAAATTAAACAGACAGTTACACATTATATCTACATCTCCCCAACGAAATATAAGCCTAATAAAGCTACTTTTTACTCAAATTGTAAGCCAAATTAAACTTATATAAAGTTTtatagggtcttatcgtcccactaaataatttgagccttttcactcaaaag	Anopheles sinensis 16S ribosomal RNA gene, partial sequence; mitochondrial gene for mitochondrial product
MK825747	508	species	109668	Anopheles lesteri	7164	Anopheles	7157	Culicidae	2759	Eukaryota	R	TCTTAATCCAACATCGAGGTC	0	AAGGACGAGAAGACCCTATA	1	216	ctaactttaacttctacacctaaaaataactcttaatccaacatcgaggtcGCAATCTTTTTTATCGATATGAACTCTCTAAAAAAATTACGCTGTTATCCCTAAGGTAACTTAATTTTTTAATCCATAATACAGGATCTTTAATTCATAAATCAATGTTAAAAACAAATAAAAGTTAATTAAATTTTAATACCACCCCAGTAAAATTTTATCTAAAATATAAATTTTAAAATTCTTTATAATTTATAATTTATAAAAATAAAGATCtatagggtcttctcgtcctttaatttaattttagctttttaactaaaaaa	UNVERIFIED: Anopheles lesteri 16S ribosomal RNA-like gene, partial sequence; mitochondrial
AY049016	553	species	112268	Anopheles minimus	7164	Anopheles	7157	Culicidae	2759	Eukaryota	R	TCTTAATCCAACATCGAGGTC	0	AAAGACGAGAAGACCCTATA	1	216	aaactttaaacttctacacctaataataactcttaatccaacatcgaggtcGCAATCTTTTTTATCGATATGAACTCTCTAAAAAAATTACGCTGTTATCCCTAAGGTAACTTAAATTTTTAATCCATAAAACAGGATCTTTTATTCATAAATATATGTTAATAAATAATAAAAGTTAATTTAATTTTAATACCACCCCAATAAAATTTTATTTAAAATATAATTTTTAAAATTCTTTATAAATTATAATTTATAAAAATAAAGATCtatagggtcttctcgtcttttaattatattttaactttttaattaaaaaa	Anopheles minimus 16S ribosomal RNA gene, partial sequence; mitochondrial gene for mitochondrial product
AF402097	551	species	112268	Anopheles minimus	7164	Anopheles	7157	Culicidae	2759	Eukaryota	R	TCTTAATCCAACATCGAGGTC	0	AAAGACGAGAAGACCCTATA	1	216	aaactttaaacttctacacctaataataactcttaatccaacatcgaggtcGCAATCTTTTTTATCGATATGAACTCTCTAAAAAAATTACGCTGTTATCCCTAAGGTAACTTAAATTTTTAATCCATAAAACAGGATCTTTTATTCATAAATATATGTTAATAAATAATAAAAGTTAATTTAATTTTAATACCACCCCAATAAAATTTTATTTAAAATATAATTTTTAAAATTCTTTATAAATTATAATTTATAAAAATAAAGATCtatagggtcttctcgtcttttaattatattttaactttttaattaaaaaa	Anopheles minimus 16S ribosomal RNA gene, partial sequence; mitochondrial gene for mitochondrial product
KU880657	502	species	120870	Ochlerotatus caspius	190765	Ochlerotatus	7157	Culicidae	2759	Eukaryota	R	TCTTAATCCAACATCGAGGTC	0	AAGGACGAGAAGACCCTATA	1	217	aactttaaacttctacacctaaaaataactcttaatccaacatcgaggtcGCAATCTTTTTTGTCGATATGAACTCTAAAAAAAAATTACGCTGTTATCCCTAAGGTAACTTAATTTTTTAATCAATATAACTGGATCAATTATTCATATATTAATGTAAATAAATAATAAAAGTTATTTAAATTTTAATACCACCCCAGTAAAATTTTTTATTAAACTATAAATTTAATTATTCTTTTTAATTTATAATTAACAAAAATAAAGATCtatagggtcttctcgtcctttaattacattttaactttttaattaaaaaa	Ochlerotatus caspius isolate alsk-w044 16S ribosomal RNA gene, partial sequence; mitochondrial
DQ397915	803	species	140438	Aedes japonicus	7158	Aedes	7157	Culicidae	2759	Eukaryota	R	TCTTAATCCAACATCGAGGTC	0	AAGGACGAGAAGACCCTATA	1	217	aaactttaaacttctacacctaaaaataactcttaatccaacatcgaggtcGCAATCTTTTTTGTCGATATGAACTCTAAAAAAAAATTACGCTGTTATCCCTAAGGTAACTTAATTTTTTAATCAATAAAACTGGATCAATTATTCATATATTAATGTAAATAAATTATAAAAGTTATTTAAATTTTAATACCACCCCAGCAAAATTTTTTATTAAATTATAAATTTAATTATTCTTTTTAATTTATAATTAAAAAAAATAAAGATCtatagggtcttctcgtcctttaactacattttaactttttaattaaaaaa	Ochlerotatus japonicus isolate A81 16S ribosomal RNA gene, partial sequence; mitochondrial
MK825745	509	species	254294	Anopheles belenrae	7164	Anopheles	7157	Culicidae	2759	Eukaryota	R	TCTTAATCCAACATCGAGGTC	0	AAGGACGAGAAGACCCTATA	1	216	aaactttaaacttctacacctaaaaataactcttaatccaacatcgaggtcGCAATCTTTTTTATCGATATGAACTCTCTAAAAAAATTACGCTGTTATCCCTAAGGTAACTTAATTTTTTAATCCATAATACAGGATCTTAAATTCATAAATCAATGTTAAAAATAAATAAAAGTTARTTAAATTTTAATACCACCCCAGTAAAATTTTATCTAAAATATAAATTTTAAAATTCTTTATAATTTATAATTTATAAAAATAAAGATCtatagggtcttctcgtcctttaatttaattttagctttttaactaaaaaa	UNVERIFIED: Anopheles belenrae 16S ribosomal RNA-like gene, partial sequence; mitochondrial
MK825748	509	species	261159	Anopheles sineroides	7164	Anopheles	7157	Culicidae	2759	Eukaryota	R	TCTTAATCCAACATCGAGGTC	0	AAGGACGAGAAGACCCTATA	1	216	aaactttaaacttctacacctaaaaataactcttaatccaacatcgaggtcGCAATCTTTTTTATCGATATGAACTCTCTAAAAAAATTACGCTGTTATCCCTAAGGTAACTTAATTTTTTAATCCATAATACAGGATCTTTAATTCATAAATCAATGTTAAAAATAAATAAAAGTTAATTAAATTTTAATACCACCCCAGTAAAATTTTATCTAAAATATAAATTTTAAAATTCTTTATAATTTATAATTTATAAAAATAAAGATCtatagggtcttctcgtcctttaatttaattttagctttttaactaaaaaa	UNVERIFIED: Anopheles sineroides 16S ribosomal RNA-like gene, partial sequence; mitochondrial
MK825746	509	species	296717	Anopheles kleini	7164	Anopheles	7157	Culicidae	2759	Eukaryota	R	TCTTAATCCAACATCGAGGTC	0	AAGGACGAGAAGACCCTATA	1	216	aaactttaaacttctacacctaaaaataactcttaatccaacatcgaggtcGCAATCTTTTTTATCGATATGAACTCTCTAAAAAAATTACGCTGTTATCCCTAAGGTAACTTAATTTTTTAATCCATAATACAGGATCTTAAATTCATAAATCAATGTTAAAAATAAATAAAAGTTAGTTAAATTTTAATACCACCCCAGTAAAATTTTATCTAAAATATAAATTTTAAAATTCTTTATAATTTATAATTTATAAAAATAAAGATCtatagggtcttctcgtcctttaatttaattttagctttttaactaaaaaa	UNVERIFIED: Anopheles kleini 16S ribosomal RNA-like gene, partial sequence; mitochondrial
KU880656	499	species	545656	Culex modestus	7174	Culex	7157	Culicidae	2759	Eukaryota	R	TCTTAATCCAACATCGAGGTC	0	AAGGACGAGAAGACCCTATA	1	217	aactttaaacttctacacctaaaaataactcttaatccaacatcgaggtcGCAATCTTTTTTGTCGATATGAACTCTAAAAAAAAATTACGCTGTTATCCCTAAGGTAACTTAAATTTTTAATCAATAAAACTGGATCATTTATTCATATATTAATGTTAAAAAATTTTAAAAGTTTTTTAAATTTTAATATCACCCCAATAAAATTTTTTATTAAATTATAAATTTTAAAATTCTTTTTAATTTATAAATAAAAAAAATAAAGATCtatagggtcttctcgtcctttaattttattttaactttttaattaaaaaa	Culex modestus isolate alsk-w024 16S ribosomal RNA gene, partial sequence; mitochondrial

## Sheet: 16S-D2_shared_with_Schneider
These are the available GenBank accessions that contain both the forward and reverse primers used herein to amplify D2. They have been trimmed to include only those species that are shared with the analogous dataset for Schneider et al. 2016.
GenBank Accession	length of the original sequence	taxonomic rank	taxid	scientific name	taxid of the genus	genus	taxid of the family	family	taxid of the super kingdom	super kingdom	strand (direct or reverse)	target sequence of the first primer	number of mismatches for the first primer	target sequence of the second primer	number of mismatches for the second primer	length of the amplified fragment (excluding primers)	sequence	definition
JX070786	517	species	112268	Anopheles minimus	7164	Anopheles	7157	Culicidae	2759	Eukaryota	D	AAGCACTCTGAATAGAGAGTC	0	TTGTCCGTGTTTCAAGAC	1	399	aataccgccatgagaccgatagaagacaagtaccgtgagggaaagttgaaaagcactctgaatagagagtcAAATAGTACGTGAAACTGCCTAGGGGACGCAAACCTGTTGAACTCAATGATCCGGGCGGCGATATTCAGCGGTGGTCCACCCTTACGGGTTGGCTGCCGTGCACTTATCGGTCCGCAGTAACGGACATCGCGATCCATTACAATGGGGCATTCCACCAATGGCCCCTAGCTCGTGGTTGGCGGCTTTCTAGTAAGGTGGCTCGGCGGCCTCCCTGAGCGAAAGTCTCCGCGCCCTTCACACCAAAGGGGCGCAGGGCCCGATCGAGCTTGGTGTGCCGCTGGAAATGTGATGGATTGGTATGAGCGGGGTTCGAGTGTGTGGCCTTAA…	Anopheles minimus isolate D2_102 28S ribosomal RNA gene, partial sequence
L22060	5298	species	7160	Aedes albopictus	7158	Aedes	7157	Culicidae	2759	Eukaryota	D	AAGCACTCTGAATAGAGAGTC	0	TGGTCCGTGTTTCAAGAC	0	380	aaatatcaccacgagaccgatagcgaacaagtaccgtgaggaaagttgaaaagcactctgaatagagagtcAAAAAGTACGTGAAACTGCCTAGGGCTCAAGCCCGTTGAACTCGATTATCCGAGCGGAGACATTCACCTGCGGTTGGCCGGCGACGGCACGGCCGCAGGGCACTTGTCTCTCGCACTAGCCAAGAGGACACTGCGATCCATTACGAAACAGCTTTCGCGCAAGCGCAAGGTCGCCCGACAACTGCCCCCTGGTGCTGGTTGCTTGCCCCACAGTAGCGACGCTCAGTTCTGAAGGCCTGTGCCGCGAGGTGGGGCTTACTGCACGTGGTGTTCTAGCAGTCGGGCGCGTGATGGATTCCCCCGGACACCGGGTGGTCTTCCCGTAAGG…	Aedes albopictus 18S, 5.8S, and 28S ribosomal RNA genes
MG242555	757	species	120870	Ochlerotatus caspius	190765	Ochlerotatus	7157	Culicidae	2759	Eukaryota	D	AAGCACTCTGAATAGAGAGTC	0	TGGTCCGTGTTTCAAGAC	0	377	aatatcaccacgagaccgatagcgaacaagtaccgtgagggaaagttgaaaagcactctgaatagagagtcAAAAAGTACGTGAAACTGCCTAGGGCTCAAGCCCGTTGAACTCGATTATCCGAGCGGAGACATTCACCTGCGGTTGGCCGGCAACGGTCCGCCGCAGGGCACTTGTCTCCCGCGCACAAGAGGACATTGCGATCCATTACGAAACAGCTTTAGCGTCGCAAGACGCAAGGTCGCCCGACAGTTGCCCCTTGGTGCTGGTTGCTTGCCCCACAGTAGCGACGCTCAGTTCTGAAGGCCTGTGCCGCGAGGTGGGGCTTACTGCACGTGGTGTTTGCAGTCGGGCGCGTGATGGATTTCCGCGTACACCGTCGGTCTTCCCGCAATGGAC…	Ochlerotatus caspius 28S ribosomal RNA gene, partial sequence
MG242540	774	species	7159	Aedes aegypti	7158	Aedes	7157	Culicidae	2759	Eukaryota	D	AAGCACTCTGAATAGAGAGTC	0	TGGTCCGTGTTTCAAGAC	0	384	aatatcaccacgagaccgatagcgaacaagtaccgtgagggaaagttgaaaagcactctgaatagagagtcAAAAAGTACGTGAAACTGCCTAGGGCTCAAGCCCGTTGAACTCGATTATCCGATGCGGAGACATTCACCTGCGGTGTGCTGCGAACCAGTGCGCCGCAGGGCACTTGTCTACTCGCGCTAGCCAAGAGGACACTGCGATCCATTACGAAACAGCTTTCGCGTCGCGAGACGCAAGGTCGCCCGACAGTTGCCCCCTGGTGCTGGTAGCTTGCCCCACAGTAGCGACGCTCAGTTCTGAAGGCCTGTGCCGCGAGGTGGGGCTTACTGCACGTGGTGTTTGCAGTCGGGCGCGTGATGGATTCCCCCGGACACCGGGTGGTCTTCCCGC…	Aedes aegypti 28S ribosomal RNA gene, partial sequence
KF687488	506	species	7159	Aedes aegypti	7158	Aedes	7157	Culicidae	2759	Eukaryota	D	AAGCACTCTGAATAGAGAGTC	0	TTGTCCGTGTTTCAAGAC	1	384	aatatcaccacgagaccgatagcgaacaagtaccgtgagggaaagttgaaaagcactctgaatagagagtcAAAAAGTACGTGAAACTGCCTAGGGCTCAAGCCCGTTGAACTCGATTATCCGATGCGGAGACATTCACCTGCGGTGTGCTGCGACCCAGTGCGCCGCAGGGCACTTGTCTACTCGCGCTAGCCAAGAGGACACTGCGATCCATTACGAAACAGCTTTCGCGTCGCGAGACGCAAGGTCGCCCGACAGTTGCCCCCTGGTGCTGGTAGCTTGCCCCACAGTAGCGACGCTCAGTTCTGAAGGCCTGTGCCGCGAGGTGGGGCTTACTGCACGTGGTGTTTGCAGTCGGGCGCGTGATGGATTCCCCCGGACACCGGGTGGTCTTCCCGC…	Aedes aegypti 28S ribosomal RNA gene, partial sequence
XM_001865926	1110	species	7176	Culex quinquefasciatus	7174	Culex	7157	Culicidae	2759	Eukaryota	D	AAGCACTCTGAATAGAGAGTC	0	TGGTCCGTGTTTCAAGAC	0	389	aatatcaccacgagaccgatagcgaacaagtaccgtgagggaaagttgaaaagcactctgaatagagagtcAAAAAGTACGTGAAACTGCCTAGGGCTCAAGCCCGTTGAACTCGATTATCCGCGGCGGAGATATTCACCTGCGGTTGGCCCTCACCGGTCCGCCGCAGGGCACTTACCTCCTGCCTCACGAGGACGTTGCGATCCATTACGGAACGGTTAGCCAGCAATGGCTACAGGCCCGGCACCTGCCCCTTGGCATTTGGTTGCTTGTCCCACAGTAGCGGCGCTCAGTTCGGAAGGCCTGCGCTGCAACCTGAGGCTTACCGGTGCGTGGTGTGCAGCCGGGCGCGTGATGGATTCCCGCGTCCACCGTCTCGGGAGAGGCTTGCCTCTCCCA…	Culex quinquefasciatus conserved hypothetical protein, mRNA
MG242580	765	species	140438	Aedes japonicus	7158	Aedes	7157	Culicidae	2759	Eukaryota	D	AAGCACTCTGAATAGAGAGTC	0	TGGTCCGTGTTTCAAGAC	0	381	aatatcaccacgagaccgatagcgaacaagtaccgtgagggaaagttgaaaagcactctgaatagagagtcAAAAAGTACGTGAAACTGCCTAGGGCTCAAGCCCGTTGAACTCGATTATCCGAGCGGAGACATTCACCTGCGGCCGGGGGCTTTGCCGCCCAYGCTGCAGGGCACTTGTCTCCCGCGCTACACGAGGACATTGCGATCCATTACGAAACAGCTTCTGCGTCGCAAGACGCAAGGTCGCCCGACAGTTGCCCCTTGGTGCCGGTTGCTTGCCCCACCGTAGCGACGCTCAGTTCYGAAGGCCTGTGCCGCGAGCTGGGGCTTACTGCACGTGGTGTTTGCAGTCGGGCGCGTGATGGATTCCAGCGTACACCGTCGGCCTTCCCGCAAT…	Aedes japonicus 28S ribosomal RNA gene, partial sequence
MG242543	774	species	7160	Aedes albopictus	7158	Aedes	7157	Culicidae	2759	Eukaryota	D	AAGCACTCTGAATAGAGAGTC	0	TGGTCCGTGTTTCAAGAC	0	384	aatatcaccacgagaccgatagcgaacaagtaccgtgagggaaagttgaaaagcactctgaatagagagtcAAAAAGTACGTGAAACTGCCTAGGGCTCAAGCCCGTTGAACTCGATTATCCGAGCGGAGACATTCACCTGCGGTTGGCCGGCGACGGCACGGCCGCAGGGCACTTGTCTCTCGCACTAGCCAAGAGGACACTGCGATCCATTACGAAACAGCTTTCGCGCCGCAAGGCGCAAGGTCGCCCGACAACTGCCCCCTGGTGCTGGTTGCTTGCCCCACAGTAGCGACGCTCAGTTCTGAAGGCCTGTGCCGCGAGGTGGGGCTTACTGCACGTGGTGTTCTAGCAGTCGGGCGCGTGATGGATTCCCCCGGACACCGGGTGGTCTTCCCGT…	Aedes albopictus 28S ribosomal RNA gene, partial sequence
GU384725	1624	species	261159	Anopheles sineroides	7164	Anopheles	7157	Culicidae	2759	Eukaryota	D	AAGCACTCTGAATAGAGAGTC	0	TGGTCCGTGTTTCAAGAC	0	457	aatacgaccatgagaccgatagtaaacaagtaccgtgtgggaaagttgaaaagcactctgaatagagagtcAAAGAGTACGTGAAACTGCCGAGGGTGTAAAGCCTGTTGAACTCAATTATCCGTAGATGCCCGCAACCTGGATTTTGGCTGTCATGCGACTGTAGGCTCACGCTCTCGGTCGTAGGCCATATCCTAGCGGGGATCGAGCGCGGACATCGTGATCCATTACGCAAACCCAATGCGAGCGGCGACTCCGGTTGCTGCGAGCATATCCAACACCAGGTCCCAGAACACGCGGTCGACCCTCTAGTAGTGGCGCTCAGCTTAAGGCCGGCGTCGCGAACGGGGGATCGAGGCTCCGGTCTCGAGTTCGGCTAGTTCAGGTGTGCCGTTGGAT…	Anopheles sineroides isolate SINEK03 5.8S ribosomal RNA gene, partial sequence; internal transcribed spacer 2, complete sequence; and 28S ribosomal RNA gene, partial sequence
GU384724	1624	species	261159	Anopheles sineroides	7164	Anopheles	7157	Culicidae	2759	Eukaryota	D	AAGCACTCTGAATAGAGAGTC	0	TGGTCCGTGTTTCAAGAC	0	457	aatacgaccatgagaccgatagtaaacaagtaccgtgtgggaaagttgaaaagcactctgaatagagagtcAAAGAGTACGTGAAACTGCCGAGGGTGTAAAGCCTGTTGAACTCAATTATCCGTAGATGCCCGCAACCTGGATTTTGGCTGTCATGCGACTGTAGGCTCACGCTCTCGGTCGTAGGCCATATCCTAGCGGGGATCGAGCGCGGACATCGTGATCCATTACGCAAACCCAATGCGAGCGGCGACTCCGGTTGCTGCGAGCATATCCAACACCAGGTCCCAGAACACGCGGTCGACCCTCTAGTAGTGGCGCTCAGCTTAAGGCCGGCGTCGCGAACGGGGGATCGAGGCTCCGGTCTCGAGTTCGGCTAGTTCAGGTGTGCCGTTGGAT…	Anopheles sineroides isolate SINEK02 5.8S ribosomal RNA gene, partial sequence; internal transcribed spacer 2, complete sequence; and 28S ribosomal RNA gene, partial sequence
GU384723	1624	species	261159	Anopheles sineroides	7164	Anopheles	7157	Culicidae	2759	Eukaryota	D	AAGCACTCTGAATAGAGAGTC	0	TGGTCCGTGTTTCAAGAC	0	457	aatacgaccatgagaccgatagtaaacaagtaccgtgtgggaaagttgaaaagcactctgaatagagagtcAAAGAGTACGTGAAACTGCCGAGGGTGTAAAGCCTGTTGAACTCAATTATCCGTAGATGCCCGCAACCTGGATTTTGGCTGTCATGCGACTGTAGGCTCACGCTCTCGGTCGTAGGCCATATCCTAGCGGGGATCGAGCGCGGACATCGTGATCCATTACGCAAACCCAATGCGAGCGGCGACTCCGGTTGCTGCGAGCATATCCAACACCAGGTCCCAGAACACGCGGTCGACCCTCTAGTAGTGGCGCTCAGCTTAAGGCCGGCGTCGCGAACGGGGGATCGAGGCTCCGGTCTCGAGTTCGGCTAGTTCAGGTGTGCCGTTGGAT…	Anopheles sineroides isolate SINEK01 5.8S ribosomal RNA gene, partial sequence; internal transcribed spacer 2, complete sequence; and 28S ribosomal RNA gene, partial sequence
GU384722	1637	species	109668	Anopheles lesteri	7164	Anopheles	7157	Culicidae	2759	Eukaryota	D	AAGCACTCTGAATAGAGAGTC	0	TGGTCCGTGTTTCAAGAC	0	459	aatacaaccatgagaccgatagtaaacaagtaccgtgtgggaaagttgaaaagcactctgaatagagagtcAAAAAGTACGTGAAACTGCCGAGGGTGTAAAGCCTGTTGAACTCAATTATCCGTAGAATTTCTGGCAGCCCGGGAAATGGCTGTCACAGATACCGGCCAGTTGTCGGGATCTAGCCATTTCCCTTGCGAGATTCGAGTGCGGACATCGTGATCCATTACGCAAACCCAATGCGAGCGGCGACTCCGGTCGTGCGGCGAGCATATCCAACACCAGGTCCCAGAACAGTGCGGTCGACCCTCTAGTAGTGGCGCTCAGCTTAAGGCCGGCGTCGCAAACGGGGGATCGAGGCTCCGGTCTCGAGTTCGGCCAGTTCCGGTGTGCCGTTGG…	Anopheles lesteri isolate LES06 5.8S ribosomal RNA gene, partial sequence; internal transcribed spacer 2, complete sequence; and 28S ribosomal RNA gene, partial sequence
GU384720	1637	species	109668	Anopheles lesteri	7164	Anopheles	7157	Culicidae	2759	Eukaryota	D	AAGCACTCTGAATAGAGAGTC	0	TGGTCCGTGTTTCAAGAC	0	459	aatacaaccatgagaccgatagtaaacaagtaccgtgtgggaaagttgaaaagcactctgaatagagagtcAAAAAGTACGTGAAACTGCCGAGGGTGTAAAGCTCGTTGAACTCAATTATCCGTAGAATTTCTGGCAGCCCGGGAAATGGCTGTCACAGATACCGGCCAGTTGTCGGGATCTAGCCATTTCCCTTGCGAGATTCGAGTGCGGACATCGTGATCCATTACGCAAACCCAATGCGAGCGGCGACTCCGGTCGTGCGGCGAGCATATCCAACACCAGGTCCCAGAACAGTGCGGTCGACCCTCTAGTAGTGGCGCTCAGCTTAAGGCCGGCGTCGCAAACGGGGGATCGAGGCTCCGGTCTCGAGTTCGGCCAGTTCCGGTGTGCCGTTGG…	Anopheles lesteri isolate LES04 5.8S ribosomal RNA gene, partial sequence; internal transcribed spacer 2, complete sequence; and 28S ribosomal RNA gene, partial sequence
GU384719	1637	species	109668	Anopheles lesteri	7164	Anopheles	7157	Culicidae	2759	Eukaryota	D	AAGCACTCTGAATAGAGAGTC	0	TGGTCCGTGTTTCAAGAC	0	459	aatacaaccatgagaccgatagtaaacaagtaccgtgtgggaaagttgaaaagcactctgaatagagagtcAAAAAGTACGTGAAACTGCCGAGGGTGTAAAGCTCGTTGAACTCAATTATCCGTAGAATTTCTGGCAGCCCGGGAAATGGCTGTCACAGATACCGGCCAGTTGTCGGGATCTAGCCATTTCCCTTGCGAGATTCGAGTGCGGACATCGTGATCCATTACGCAAACCCAATGCGAGCGGCGACTCCGGTCGTGCGGCGAGCATATCCAACACCAGGTCCCAGAACAGTGCGGTCGACCCTCTAGTAGTGGCGCTCAGCTTAAGGCCGGCGTCGCAAACGGGGGATCGAGGCTCCGGTCTCGAGTTCGGCCAGTTCCGGTGTGCCGTTGG…	Anopheles lesteri isolate LES03 5.8S ribosomal RNA gene, partial sequence; internal transcribed spacer 2, complete sequence; and 28S ribosomal RNA gene, partial sequence
GU384718	1637	species	109668	Anopheles lesteri	7164	Anopheles	7157	Culicidae	2759	Eukaryota	D	AAGCACTCTGAATAGAGAGTC	0	TGGTCCGTGTTTCAAGAC	0	459	aatacaaccatgagaccgatagtaaacaagtaccgtgtgggaaagttgaaaagcactctgaatagagagtcAAAAAGTACGTGAAACTGCCGAGGGTGTAAAGCCTGTTGAACTCAATTATCCGTAGAATTTCTGGCAGCCCGGGAAATGGCTGTCACAGATACCGGCCAGTTGTCGGGATCTAGCAATTTCCCTTGCGAGATTCGAGTGCGGACATCGTGATCCATTACGCAAACCCAATGCGAGCGGCGACTCCGGTCGTGCGGCGAGCATATCCAACACCAGGTCCCAGAACAGTGCGGTCGACCCTCTAGTAGTGGCGCTCAGCTTAAGGCCGGCGTCGCAAACGGGGGATCGAGGCTCCGGTCTCGAGTTCGGCCAGTTCCGGTGTGCCGTTGG…	Anopheles lesteri isolate LES01 5.8S ribosomal RNA gene, partial sequence; internal transcribed spacer 2, complete sequence; and 28S ribosomal RNA gene, partial sequence
GU384717	1637	species	109668	Anopheles lesteri	7164	Anopheles	7157	Culicidae	2759	Eukaryota	D	AAGCACTCTGAATAGAGAGTC	0	TGGTCCGTGTTTCAAGAC	0	459	aatacaaccatgagaccgatagtaaacaagtaccgtgtgggaaagttgaaaagcactctgaatagagagtcAAAAAGTACGTGAAACTGCCGAGGGTGTAAAGCTCGTTGAACTCAATTATCCGTAGAATTTCTGGCAGCCCGGGAAATGGCTGTCACAGATACCGGCCAGTTGTCGGGATCTAGCCATTTCCCTTGCGAGATTCGAGTGCGGACATCGTGATCCATTACGCAAACCCAATGCGAGCGGCGACTCCGGTCGTGCGGCGAGCATATCCAACACCAGGTCCCAGAACAGTGCGGTCGACCCTCTAGTAGTGGCGCTCAGCTTAAGGCCGGCGTCGCAAACGGGGGATCGAGGCTCCGGTCTCGAGTTCGGCCAGTTCCGGTGTGCCGTTGG…	Anopheles lesteri isolate LES02 5.8S ribosomal RNA gene, partial sequence; internal transcribed spacer 2, complete sequence; and 28S ribosomal RNA gene, partial sequence
GU384713	1640	species	296717	Anopheles kleini	7164	Anopheles	7157	Culicidae	2759	Eukaryota	D	AAGCACTCTGAATAGAGAGTC	0	TGGTCCGTGTTTCAAGAC	0	459	aatacgaccatgagaccgatagtaaacaagtaccgtgtgggaaagttgaaaagcactctgaatagagagtcAAATAGTACGTGAAACTGCCGAGGGTGTAAAGCCTGTTGAACTCGATTATCCGTAGTTTCTGGCAACGTGGGTTTTGGCTGTCACGCAGAAGGGGGCAAATGCTCTCTTCTGTATGCCTTGATCCTAGCCAGGAACGAGTGCGGACATCGTGATCCATTACGCAAACCAAATGCGAGCGGCGACTCCGGTTGCTGCGAGCATATCCAACATCAGGTCCCAGAACATGCGGTCGACCCTCTAGTAGTGGCGCTCAGCTTAAGGCCGGCGTCGCGAACGGGGGATCGAGGCTCCGGTCTCGAGTTCGGCTAGTTCAGGTGTGCCGTTGGA…	Anopheles kleini isolate KLEK01 5.8S ribosomal RNA gene, partial sequence; internal transcribed spacer 2, complete sequence; and 28S ribosomal RNA gene, partial sequence
GU384712	1639	species	254294	Anopheles belenrae	7164	Anopheles	7157	Culicidae	2759	Eukaryota	D	AAGCACTCTGAATAGAGAGTC	0	TGGTCCGTGTTTCAAGAC	0	459	aatacgaccatgagaccgatagtaaacaagtaccgtgtgggaaagttgaaaagcactctgaatagagagtcAAATAGTACGTGAAACTGCCGAGGGTGTAAAGCCTGTTGAACTCGATTATCCGTAGCTCCTGGCAACGTGGGTTTTGGCTGTCACGCAGAAGGGGGCAAATGCTCTCTTCTGTATGCCTTGATCCTAGCCAGGAGCGAGTGCGGACGTCGTGATCCATTACGCAAACCAAATGCGAGCGGCGACTCCGGTTGCTGCGAGCATATCCAACATCAGGTCCCAGAACATGCGGTCGACCCTCTAGTAGTGGCGCTCAGCTTAAGGCCGGCGTCGCGAACGGGGGATCGAGGCTCCGGTCTCGAGTTCGGCTAGTTCAGGTGTGCCGTTGGA…	Anopheles belenrae isolate BELK06 5.8S ribosomal RNA gene, partial sequence; internal transcribed spacer 2, complete sequence; and 28S ribosomal RNA gene, partial sequence
GU384711	1639	species	254294	Anopheles belenrae	7164	Anopheles	7157	Culicidae	2759	Eukaryota	D	AAGCACTCTGAATAGAGAGTC	0	TGGTCCGTGTTTCAAGAC	0	459	aatacgaccatgagaccgatagtaaacaagtaccgtgtgggaaagttgaaaagcactctgaatagagagtcAAATAGTACGTGAAACTGCCGAGGGTGTAAAGCCTGTTGAACTCGATTATCCGTAGCTCCTGGCAACGTGGGTTTTGGCTGTCACGCAGAAGGGGGCAAATGCTCTCTTCTGTATGCCTTGATCCTAGCCAGGAGCGAGTGCGGACATCGTGATCCATTACGCAAACCAAATGCGAGCGGCGACTCCGGTTGCTGCGAGCATATCCAACATCAGGTCCCAGAACATGCGGTCGACCCTCTAGTAGTGGCGCTCAGCTTAAGGCCGGCGTCGCGAACGGGGGATCGAGGCTCCGGTCTCGAGTTCGGCTAGTTCAGGTGTGCCGTTGGA…	Anopheles belenrae isolate BELK05 5.8S ribosomal RNA gene, partial sequence; internal transcribed spacer 2, complete sequence; and 28S ribosomal RNA gene, partial sequence
GU384710	1639	species	254294	Anopheles belenrae	7164	Anopheles	7157	Culicidae	2759	Eukaryota	D	AAGCACTCTGAATAGAGAGTC	0	TGGTCCGTGTTTCAAGAC	0	459	aatacgaccatgagaccgatagtaaacaagtaccgtgtgggaaagttgaaaagcactctgaatagagagtcAAATAGTACGTGAAACTGCCGAGGGTGTAAAGCCTGTTGAACTCGATTATCCGTAGCTCCTGGCAACGTGGGTTTTGGCTGTCACGCAGAAGGGGGCAAATGCTCACTTCTGTATGCCTTGATCCTAGCCAGGAGCGAGTGCGGACATCGTGATCCATTACGCAAACCAAATGCGAGCGGCGACTCCGGTTGCTGCGAGCATATCCAACATCAGGTCCCAGAACATGCGGTCGACCCTCTAGTAGTGGCGCTCAGCTTAAGGCCGGCGTCGCGAACGGGGGATCGAGGCTCCGGTCTCGAGTTCGGCTAGTTCAGGTGTGCCGTTGGA…	Anopheles belenrae isolate BELK04 5.8S ribosomal RNA gene, partial sequence; internal transcribed spacer 2, complete sequence; and 28S ribosomal RNA gene, partial sequence
GU384700	1648	species	74873	Anopheles sinensis	7164	Anopheles	7157	Culicidae	2759	Eukaryota	D	AAGCACTCTGAATAGAGAGTC	0	TGGTCCGTGTTTCAAGAC	0	450	aatacgaccatgagaccgatagtaaacaagtaccgtgtgggaaagttgaaaagcactctgaatagagagtcAAATAGTACGTGAAACTGCCGAGGGTGTAAAGCCTGTTGAACTCGATTATCCGTAGTTCCTGGCATCGTGGGTTTTGGCTGTCACGCAGAAGGGGGCCTTCTGTATGCCTTGACCCTAGCCAGGAACGAGTGCGGACATCGTGATCCATTACGCAAACCAAATGCGAGCGGCGACTCCGGTTGCTGCGAGCATATCCAACATCAGGTCCCAGAACATGCGGTCGACCCTCTAGTAGTGGCGCTCAGCTTAAGGCCGGCGTTGCGAACGGGGGATCGAGGCTCCGGTCTCGAGTTCGGCTAGTTCCGGTGTGCCGTTGGATGCGTGATG…	Anopheles sinensis isolate SINC01 5.8S ribosomal RNA gene, partial sequence; internal transcribed spacer 2, complete sequence; and 28S ribosomal RNA gene, partial sequence
GU384696	1648	species	74873	Anopheles sinensis	7164	Anopheles	7157	Culicidae	2759	Eukaryota	D	AAGCACTCTGAATAGAGAGTC	0	TGGTCCGTGTTTCAAGAC	0	450	aatacgaccatgagaccgatagtaaacaagtaccgtgtgggaaagttgaaaagcactctgaatagagagtcAAATAGTACGTGAAACTGCCGAGGGTGTAAAGCCTGTTGAACTCGATTATCCGTAGTTCCTGGCATCGTGGGTTTTGGCTGTCACGCAGAAGGGGGCCTTCTGTATGCCTTGACCCTAGCCAGGAACGAGTGCGGACATCGTGATCCATTACGCAAACCAAATGCGAGCGGCGACTCCGGTTGCTGCGAGCATATCCAACATCAGGTCCCAGAACATGCGGTCGACCCTCTAGTAGTGGCGCTCAGCTTAAGGCCGGCGTCGCCAACGGGGGATCGAGGCTCCGGTCTCGAGTTCGGCTAGTTCCGGTGTGCCGTTGGATGCGTGATG…	Anopheles sinensis isolate SINK06 5.8S ribosomal RNA gene, partial sequence; internal transcribed spacer 2, complete sequence; and 28S ribosomal RNA gene, partial sequence
GU384695	1648	species	74873	Anopheles sinensis	7164	Anopheles	7157	Culicidae	2759	Eukaryota	D	AAGCACTCTGAATAGAGAGTC	0	TGGTCCGTGTTTCAAGAC	0	450	aatacgaccatgagaccgatagtaaacaagtaccgtgtgggaaagttgaaaagcactctgaatagagagtcAAATAGTACGTGAAACTGCCGAGGGTGTAAAGCCTGTTGAACTCGATTATCCGTAGTTCCTGGCATCGTGGGTTTTGGCTGTCACGCAGAAGGGGGCCTTCTGTATGCCTTGACCCTAGCCAGGAACGAGTGCGGACATCGTGATCCATTACGCAAACCAAATGCGAGCGGCGACTCCGGTTGCTGCGAGCATATCCAACATCGGGTCCCAGAACATGCGGTCGACCCTCTAGTAGTGGCGCTCAGCTTAAGGCCGGCGTCGCGAACGGGGGATCGAGGCTCCGGTCTCGAGTTCGGCTAGTTCCGGTGTGCCGTTGGATGCGTGATG…	Anopheles sinensis isolate SINK05 5.8S ribosomal RNA gene, partial sequence; internal transcribed spacer 2, complete sequence; and 28S ribosomal RNA gene, partial sequence
GU384694	1648	species	74873	Anopheles sinensis	7164	Anopheles	7157	Culicidae	2759	Eukaryota	D	AAGCACTCTGAATAGAGAGTC	0	TGGTCCGTGTTTCAAGAC	0	450	aatacgaccatgagaccgatagtaaacaagtaccgtgtgggaaagttgaaaagcactctgaatagagagtcAAATAGTACGTGAAACTGCCGAGGGTGTAAAGCCTGTTGAACTCGATTATCCGTAGTTCCTGGCATCGTGGGTTTTGGCTGTCACGCAGAAGGGGGCCTTCTGTATGCCTTGACCCTAGCCAGGAACGAGTGCGGACATCGTGATCCATTACGCAAACCAAATGCGAGCGGCGACTCCGGTTGCTGCGAGCATATCCAACATCAGGTCCCAGAACATGCGGTCGACCCTCTAGTAGTGGCGCTCAGCTTAAGGCCGGCGTCGCGAACGGGGGATCGAGGCTCCGGTCTCGAGTTCGGCTAGTTCCGGTGTGCCGTTGGATGCGTGATG…	Anopheles sinensis isolate SINK04 5.8S ribosomal RNA gene, partial sequence; internal transcribed spacer 2, complete sequence; and 28S ribosomal RNA gene, partial sequence
GU384693	1651	species	74873	Anopheles sinensis	7164	Anopheles	7157	Culicidae	2759	Eukaryota	D	AAGCACTCTGAATAGAGAGTC	0	TGGTCCGTGTTTCAAGAC	0	450	aatacgaccatgagaccgatagtaaacaagtaccgtgtgggaaagttgaaaagcactctgaatagagagtcAAATAGTACGTGAAACTGCCGAGGGTGTAAAGCCTGTTGAACTCGATTATCCGTAGTTCCTGGCATCGTGGGTTTTGGCTGTCACGCAGAAGGGGGCCTTCTGTATGCCTTGACCCTAGCCAGGAACGAGTGCGGACATCGTGATCCATTACGCAAACCAAATGCGAGCGGCGACTCCGGTTGCTGCGAGCATATCCAACATCAGGTCCCAGAACATGCGGTCGACCCTCTAGTAGTGGCGCTCAGCTTAAGGCCGGCGTCGCGAACGGGGGATCGAGGCTCCGGTCTCGAGTTCGGCTAGTTCCGGTGTGCCGTTGGATGCGTGATG…	Anopheles sinensis isolate SINK03 5.8S ribosomal RNA gene, partial sequence; internal transcribed spacer 2, complete sequence; and 28S ribosomal RNA gene, partial sequence
GU384692	1648	species	74873	Anopheles sinensis	7164	Anopheles	7157	Culicidae	2759	Eukaryota	D	AAGCACTCTGAATAGAGAGTC	0	TGGTCCGTGTTTCAAGAC	0	450	aatacgaccatgagaccgatagtaaacaagtaccgtgtgggaaagttgaaaagcactctgaatagagagtcAAATAGTACGTGAAACTGCCGAGGGTGTAAAGCCTGTTGAACTCGATTATCCGTAGTTCCTGGCATCGTGGGTTTTGGCTGTCACGCAGAAGGGGGCCTTCTGTATGCCTTGACCCTAGCCAGGAACGAGTGCGGACATCGTGATCCATTACGCAAACCAAATGCGAGCGGCGACTCCGGTTGCTGCGAGCATATCCAACATCAGGTCCCAGAACATGCGGTCGACCCTCTAGTAGTGGCGCTCAGCTTAAGGCCGGCGTCGCGAACGGGGGATCGAGGCTCCGGTCTCGAGTTCGGCTAGTTCCGGTGTGCCGTTGGATGCGTGATG…	Anopheles sinensis isolate SINK02 5.8S ribosomal RNA gene, partial sequence; internal transcribed spacer 2, complete sequence; and 28S ribosomal RNA gene, partial sequence
GU384691	1648	species	74873	Anopheles sinensis	7164	Anopheles	7157	Culicidae	2759	Eukaryota	D	AAGCACTCTGAATAGAGAGTC	0	TGGTCCGTGTTTCAAGAC	0	450	aatacgaccatgagaccgatagtaaacaagtaccgtgtgggaaagttgaaaagcactctgaatagagagtcAAATAGTACGTGAAACTGCCGAGGGTGTAAAGCCTGTTGAACTCGATTATCCGTAGTTCCTGGCATCGTGGGTTTTGGCTGTCACGCAGAAGGGGGCCTTCTGTATGCCTTGACCCTAGCCAGGAACGAGTGCGGACATCGTGATCCATTACGCAAACCAAATGCGAGCGGCGACTCCGGTTGCTGCGAGCATATCCAACATCAGGTCCCAGAACATGCGGTCGACCCTCTAGTAGTGGCGCTCAGCTTAAGGCCGGCGTCGCGAACGGGGGATCGAGGCTCCGGTCTCGAGTTCGGCTAGTTCCGGTGTGCCGTTGGATGCGTGATG…	Anopheles sinensis isolate SINK01 5.8S ribosomal RNA gene, partial sequence; internal transcribed spacer 2, complete sequence; and 28S ribosomal RNA gene, partial sequence
MG242607	796	species	124917	Armigeres subalbatus	124916	Armigeres	7157	Culicidae	2759	Eukaryota	D	AAGCACTCTGAATAGAGAGTC	0	TGGTYCGTGTTTCAAGAC	1	391	aatatcaccacgagaccgatagcgaacaagtaccgtgagggaaagttgaaaagcactctgaatagagagtcAAAAAGTACGTGAAACTGCCTAGGGCTCAAGCCCGTTGAACTCGATTATCCGAGCGGAGACATTCACCTGCGGGGCTGGCCTTCCCAGGGCCGGCGCCGCAGGGCACTTGTCTCTCCCGCGCACGAGGACACTGCGATCCATTACGAAACAGCTTTCGCGTTCCACTGGGACGCGCAGGTCGCCCGACAGTTGCCCCCTGGTGCTTCCCCCGGTTGCTTGCCCCACAGTAGCGACGCTCAGTTCCGAAGGCCTGTGCCGCGAGGTGGGGCTTACTGCACGTGGTGTGCAGTCGGGCGCGTGATGGATTCCCACGAGTACGACGCGGTG…	Armigeres subalbatus 28S ribosomal RNA gene, partial sequence
GU384709	1639	species	254294	Anopheles belenrae	7164	Anopheles	7157	Culicidae	2759	Eukaryota	D	AAGCACTCTGAATAGAGAGTC	0	TGGTCCGTGTTTCAAGAC	0	459	aatacgaccatgagaccgatagtaaacaagtaccgtgtaggaaagttgaaaagcactctgaatagagagtcAAATAGTACGTGAAACTGCCGAGGGTGTAAAGCCTGTTGAACTCGATTATCCGTAGCTCCTGGCAACGTGGGTTTTGGCTGTCACGCAGAAGGGGGCAAATGCTCTCTTCTGTATGCCTTGATCCTAGCCAGGAGCGAGTGCGGACATCGTGATCCATTACGCAAACCAAATGCGAGCGGCGACTCCGGTTGCTGCGAGCATATCCAACATCAGGTCCCAGAACATGCGGTCGACCCTCTAGTAGTGGCGCTCAGCTTAAGGCCGGCGTCGCGAACGGGGGATCGAGGCTCCGGTCTCGAGTTCGGCTAGTTCAGGTGTGCCGTTGGA…	Anopheles belenrae isolate BELK03 5.8S ribosomal RNA gene, partial sequence; internal transcribed spacer 2, complete sequence; and 28S ribosomal RNA gene, partial sequence
GU384708	1639	species	254294	Anopheles belenrae	7164	Anopheles	7157	Culicidae	2759	Eukaryota	D	AAGCACTCTGAATAGAGAGTC	0	TGGTCCGTGTTTCAAGAC	0	459	aatacgaccatgagaccgatagtaaacaagtaccgtgtgggaaagttgaaaagcactctgaatagagagtcAAATGGTACGTGAAACTGCCGAGGGTGTAAAGCCTGTTGAACTCGATTATCCGTAGCTCCTGGCAACGTGGGTTTTGGCTGTCACGCAGAAGGGGGCAAATGCTCTCTTCTGTATGCCTTGATCCTAGCCAGGAGCGAGTGCGGACATCGTGATCCATTACGCAAACCAAATGCGAGCGGCGACTCCGGTTGCTGCGAGCATATCCAACATCAGGTCCCAGAACATGCGGTCGACCCTCTAGTAGTGGCGCTCAGCTTAAGGCCGGCGTCGCGAACGGGGGATCGAGGCTCCGGTCTCGAGTTCGGCTAGTTCAGGTGTGCCGTTGGA…	Anopheles belenrae isolate BELK02 5.8S ribosomal RNA gene, partial sequence; internal transcribed spacer 2, complete sequence; and 28S ribosomal RNA gene, partial sequence
GU384707	1639	species	254294	Anopheles belenrae	7164	Anopheles	7157	Culicidae	2759	Eukaryota	D	GAGCACTCTGAATAGAGAGTC	1	TGGTCCGTGTTTCAAGAC	0	459	aatacgaccatgagaccgatagtaaacaagtaccgtgtgggaaagttgaagagcactctgaatagagagtcAAATAGTACGTGAAACTGCCGAGGGTGTAAAGCCTGTTGAACTCGATTATCCGTAGCTCCTGGCAACGTGGGTTTTGGCTGTCACGCAGAAGGGGGCAAATGCTCTCTTCTGTATGCCTTGATCCTAGCCAGGAGCGAGTGCGGACATCGTGATCCATTACGCAAACCAAATGCGAGCGGCGACTCCGGTTGCTGCGAGCATATCCAACATCAGGTCCCAGAACATGCGGTCGACCCTCTAGTAGTGGCGCTCAGCTTAAGGCCGGCGTCGCGAACGGGGGATCGAGGCTCCGGTCTCGAGTTCGGCTAGTTCAGGTGTGCCGTTGGA…	Anopheles belenrae isolate BELK01 5.8S ribosomal RNA gene, partial sequence; internal transcribed spacer 2, complete sequence; and 28S ribosomal RNA gene, partial sequence
GU384698	1648	species	74873	Anopheles sinensis	7164	Anopheles	7157	Culicidae	2759	Eukaryota	D	AAGCACTCCGAATAGAGAGTC	1	TGGTCCGTGTTTCAAGAC	0	450	aatacgaccatgagaccgatagtaaacaagtaccgtgtgggaaagttgaaaagcactccgaatagagagtcAAATAGTACGTGAAACTGCCGAGGGTGTAAAGCCTGTTGAACTCGATTATCCGTAGTTCCTGGCATCGTGGGTTTTGGCTGTCACGCAGAAGGGGGCCTTCTGTATGCCTTGACCCTAGCCAGGAACGAGTGCGGACATCGTGATCCATTACGCAAACCAAATGCGAGCGGCGACTCCGGTTGCTGCGAGCATATCCAACATCAGGTCCCAGAACATGCGGTCGACCCTCTAGTAGTGGCGCTCAGCTTAAGGCCGGCGTCGCGAACGGGGGATCGAGGCTCCGGTCTCGAGTTCGGCTAGTTCCGGTGTGCCGTTGGATGCGTGATG…	Anopheles sinensis isolate SINT01 5.8S ribosomal RNA gene, partial sequence; internal transcribed spacer 2, complete sequence; and 28S ribosomal RNA gene, partial sequence
KF687519	512	species	545656	Culex modestus	7174	Culex	7157	Culicidae	2759	Eukaryota	D	AAGCACTCTGAATAGAGAGTC	0	TTTTCCGTGTTTCAAGAC	2	389	aatatcaccacgagaccgatagcgaacaagtaccgtgagggaaagttgaaaagcactctgaatagagagtcAAAAAGTACGTGAAACTGCCTAGGGCTCAAGCCCGTTGAACTCGATTATCCGCGGCGGAGATATTCACCTGCGGCTGGCCCTTTCCGGGTTCACCGCAGGGCACTTACCTCCTGCCTCACGAGGACGTTGCGATCCATTACGAAACACTCTAGCCAGGCAACTGGCTACAGGCCCGGCAACTGCCCCTTGGCATCTGGTTGCTTGTCCCACAGTAGCGGCGCTCAGTTCGGAAGGCCTGTGTCGCGACCTGGGGCTTACCGGTGCGTGGTGTGCAGCCGGGCGCGTGATGGATTCCCGCGGACACCGTCTCGGGTGCTTGCTCACCTA…	Culex modestus 28S ribosomal RNA gene, partial sequence
JX624228	654	species	30069	Anopheles stephensi	7164	Anopheles	7157	Culicidae	2759	Eukaryota	D	AAGCACTCTGAATAGAGAGTC	0	GGTCCCGGTTTTCAAGAC	5	390	aatatcaccacgagaccgatagcgaacaagtaccgtgagggaaagttgaaaagcactctgaatagagagtcAAAAAGTACGTGAAACTGCCTAGGGCTCAAGCCCGTTGAACTCGATTATCCGCGGCGGAGATATTCACCTGCGGTTGGCCCTCACCCGGTCCGCCGCAGGGCACTTACCTCCTGCCTCACGAGGACGTTGCGATCCATTACGAAACGGTTAGCCAGCGATGGCTACAGGCCCGGCACCTGCCCCTTGGCATCTGGTTGCTTGTCCCACAGTAGCGGCGCTCAGTTCGGAAGGCCTGCGCCGCAACCTGGGGCTTACCGGTGCGTGGTGTGCAGCCGGGCGCGTGATGGATTCCCGCGTACACCGTCTCGGGAGAGGCTCGCCTCTCCC…	Anopheles stephensi voucher UMZD224 28S ribosomal RNA gene, partial sequence
JX624228	654	species	30069	Anopheles stephensi	7164	Anopheles	7157	Culicidae	2759	Eukaryota	D	AAGCACTCTGAATAGAGAGTC	0	TTGGTCCTGTTTCAAGAC	4	533	aatatcaccacgagaccgatagcgaacaagtaccgtgagggaaagttgaaaagcactctgaatagagagtcAAAAAGTACGTGAAACTGCCTAGGGCTCAAGCCCGTTGAACTCGATTATCCGCGGCGGAGATATTCACCTGCGGTTGGCCCTCACCCGGTCCGCCGCAGGGCACTTACCTCCTGCCTCACGAGGACGTTGCGATCCATTACGAAACGGTTAGCCAGCGATGGCTACAGGCCCGGCACCTGCCCCTTGGCATCTGGTTGCTTGTCCCACAGTAGCGGCGCTCAGTTCGGAAGGCCTGCGCCGCAACCTGGGGCTTACCGGTGCGTGGTGTGCAGCCGGGCGCGTGATGGATTCCCGCGTACACCGTCTCGGGAGAGGCTCGCCTCTCCC…	Anopheles stephensi voucher UMZD224 28S ribosomal RNA gene, partial sequence
HM807288	495	species	7176	Culex quinquefasciatus	7174	Culex	7157	Culicidae	2759	Eukaryota	D	AAGCACTCTGAATAGAGAGTC	0	TTGTCCGTGTTTCAAGAC	1	390	aatatcaccacgagaccgatagcgaacaagtaccgtgagggaaagttgaaaagcactctgaatagagagtcAAAAAGTACGTGAAACTGCCTAGGGCTCAAGCCCGTTGAACTCGATTATCCGCGGCGGAGATATTCACCTGCGGTTGGCCCTCACCCGGTCCGCCGCAGGGCACTTACCTCCTGCCTCACGAGGACGTTGCGATCCATTACAAAACGGTTAGCCAGCGATGGCTACAGGCCCGGCACCTGCCCCTTGGCATCTGGTTGCTTGTCCCACAGTAGCGGCGCTCAGTTCGGAAGGCCTGCGCCGCAACCTGGGGCTTACCGGTGCGTGGTGTGCAGCCGGGCGCGTGATGGATTCCCGCGTACACCGTCTCGGGAGAGGCTCGCCTCTCCC…	Culex quinquefasciatus isolate 03TNV 28S ribosomal RNA gene, partial sequence
HM807287	500	species	7176	Culex quinquefasciatus	7174	Culex	7157	Culicidae	2759	Eukaryota	D	AAGCACTCTGAATAGAGAGTC	0	TGTCCGGTGTTTCAAGAC	3	390	aatatcaccacgagaccgatagcgaacaagtaccgtgagggaaagttgaaaagcactctgaatagagagtcAAAAAGTACGTGAAACTGCCTAGGGCTCAAGCCCGTTGAACTCGATTATCCGCGGCGGAGATATTCACCTGCGGTTGGCCCTCACCCGGTCCGCCGCAGGGCACTTACCTCCTGCCTCACGAGGACGTTGCGATCCATTACGAAACGGTTAGCCAGCGATGGCTACAGGCCCGGCACCTGCCCCTTGGCATCTGGTTGCTTGTCCCACAGTAGCGGCGCTCAGTTCGGAAGGCCTGCGCCGCAACCTGGGGCTTACCGGTGCGTGGTGTGCAGCCGGGCGCGTGATGGATTCCCGCGTACACCGTCTCGGGAGAGGCTCGCCTCTCCC…	Culex quinquefasciatus isolate 02KAN 28S ribosomal RNA gene, partial sequence
HM807289	501	species	7176	Culex quinquefasciatus	7174	Culex	7157	Culicidae	2759	Eukaryota	D	AAGCATTCTGAATAGAGAGTC	1	TGGTCCGTGTTTCAAGAC	0	390	aatatcaccacgagaccgatagcgaacaagtaccgtgagggaaagttgaaaagcattctgaatagagagtcAAAAAGTACGTGAAACTGCCTAGGGCTCAAGCCCGTTGAACTCGATTATCCGCGGCGGAGATATTCACCTGCGGTTGGCCCTCACCCGGTCCGCCGCAGGGCACTTACCTCCTGCCTCACGAGGACGTTGCGATCCATTACGAAACGGTTAGCCAGCGATGGCTACAGGCCCGGCACCTGCCCCTTGGCATCTGGTTGCTTGTCCCACAGTAGCGGCGCTCAGTTCGGAAGGCCTGCGCCGCAACCTGGGGCTTACCGGTGCGTGGTGTGCAGCCGGGCGCGTGATGGATTCCCGCGTACACCGTCTCGGGAGAGGCTCGCCTCTCCC…	Culex quinquefasciatus 28S ribosomal RNA gene, partial sequence
HM802160	493	species	7176	Culex quinquefasciatus	7174	Culex	7157	Culicidae	2759	Eukaryota	D	AAGCACTCTGAATAGAGAGTC	0	GGTCCCGGTTTTCAAGAC	5	390	aatatcaccacgagaccgatagcgaacaagtaccgtgagggaaagttgaaaagcactctgaatagagagtcAAAAAGTACGTGAAACTGCCTAGGGCTCAAGCCCGTTGAACTCGATTATCCGCGGCGGAGATATTCACCTGCGGTTGGCCCTCACCCGGTCCGCCGCAGGGCACTTACCTCCTGCCTCACGAGGACGTTGCGATCCATTACGAAACGGTTAGCCAGCGATGGCTACAGGCCCGGCACCTGCCCCTTGGCATCTGGTTGCTTGTCCCACAGTAGCGGCGCTCAGTTCGGAAGGCCTGCGCCGCAACCTGGGGCTTACCGGTGCGTGGTGTGCAGCCGGGCGCGTGATGGATTCCCGCGTACACCGTCTCGGGAGAGGCTCGCCTCTCCC…	Culex quinquefasciatus isolate 10 TRI 28S ribosomal RNA gene, partial sequence
JX070789	575	species	74873	Anopheles sinensis	7164	Anopheles	7157	Culicidae	2759	Eukaryota	D	AAGCACTCTGAATAGAGAGTC	0	TTTTCCGTGTTTCAAGAC	2	450	aatacgaccatgagaccgatagtaaacaagtaccgtgtgggaaagttgaaaagcactctgaatagagagtcAAATAGTACGTGAAACTGCCGAGGGTGTAAAGCCTGTTGAACTCGATTATCCGTAGTTCCTGGCATCGTGGGTTTTGGCTGTCACGCAGAAGGGGGCCTTCTGTATGCCTTGACCCTAGCCAGGAACGAGTGCGGACATCGTGATCCATTACGCAAACCAAATGCGAGCGGCGACTCCGGTTGCTGCGAGCATATCCAACATCAGGTCCCAGAACATGCGGTCGACCCTCTAGTAGTGGCGCTCAGCTTAAGGCCGGCGTCGCGAACGGGGGATCGAGGCTCCGGTCTCGAGTTCGGCTAGTTCCGGTGTGCCGTTGGATGCGTGATG…	Anopheles sinensis isolate D2_146A 28S ribosomal RNA gene, partial sequence
KF687515	480	species	7178	Culex tritaeniorhynchus	7174	Culex	7157	Culicidae	2759	Eukaryota	D	AAGCACTCTGAATAGAGAGTC	0	TTGTCCGTGTTTCAAGGC	2	383	accacgagaccgatagcgaacaagtaccgtgagggaaagttgaaaagcactctgaatagagagtcAAAAAGTACGTGAAACTGCCTAGGGCTCAAGCCCGTTGAACTCGATTATCCGCGGCGGAGATATTCACCTGCGGCTGGCCTTCACCGGTTCACCGCAGGGCACTTACCTCCTGCCTCACGAGGACGTTGCGATCCATTACGAAACGGTTTACTCGCCATGGGTTCCAGGCCCGGCACTGGCCCCTGGCAACTGGTTGCTTGTCCCACAGTAGCGGCGCTCAGTTCGGAAGGCCTGCGCCGCAACCTGGGGCTTACCGGTGCGTGGTGTGCAGCCGGGCGCGTGATGGATTCCCGCGTACACCGTCTCGGGAGCTTGCACCCACCTCCCCCAAGG…	Culex tritaeniorhynchus 28S ribosomal RNA gene, partial sequence

## Sheet: 16S-Schneider_shared_with_D2
These are the available GenBank accessions that contain both the forward and reverse primers used by Schneider et al. 2016 to amplify 16S. They have been trimmed to include only those species that are shared with the analogous dataset for D2 (herein).
GenBank Accession	length of the original sequence	taxonomic rank	taxid	scientific name	taxid of the genus	genus	taxid of the family	family	taxid of the super kingdom	super kingdom	strand (direct or reverse)	target sequence of the first primer	number of mismatches for the first primer	target sequence of the second primer	number of mismatches for the second primer	length of the amplified fragment (excluding primers)	sequence	definition
AF034475	446	species	7159	Aedes aegypti	7158	Aedes	7157	Culicidae	2759	Eukaryota	R	ACGCTGTTATCCCTAAGGTAACTTA	0	GACGAGAAGACCCTATAGATCTTTAT	0	145	ttttctcgatatgaactctaaaaaaaaattacgctgttatccctaaggtaacttaATTTTTTAATCAATATAACTGGATCAAATATTCATAAATTAATGTAAATTGAAAATAAAAGTTTTTTAAATTTTTATACCACCCCAGTAAAATTTTTTTTAAAACTATAAATTTAATTATTCTTTTTAATTTATAATTAACAAAAataaagatctatagggtcttctcgtcttttaattacattttaactttttaattaaa	Aedes aegypti 16S ribosomal RNA gene, mitochondrial gene for mitochondrial RNA, partial sequence
DQ397917	804	species	7159	Aedes aegypti	7158	Aedes	7157	Culicidae	2759	Eukaryota	R	ACGCTGTTATCCCTAAGGTAACTTA	0	GACGAGAAGACCCTATAGATCTTTAT	0	145	ttttgtcgataagaactctaaaaaaaaattacgctgttatccctaaggtaacttaATTTTTTAATCAATATAACTGGATCAAATATTCATAAATTAATGTAAATTGAAAATAAAAGTTTTTTAAATTTTAATACCACCCCAGTAAAATTTTTTATTAAAATATAAATTTAATTATTCTTTTTAATTTATAATTAACAAAAataaagatctatagggtcttctcgtcttttaattacattttaactttttaattaaa	Aedes aegypti isolate A20 16S ribosomal RNA gene, partial sequence; mitochondrial
KX524979	246	species	7159	Aedes aegypti	7158	Aedes	7157	Culicidae	2759	Eukaryota	R	ACGCTGTTATCCCTAAGGTAACTTA	0	GACGAGAAGACCCTATAGATCTTTAT	0	145	ttttgtcgataagaactctaaaaaaaaattacgctgttatccctaaggtaacttaATTTTTTAATCAATATAACTGGATCAAATATTCATAAATTAATGTAAATTGAAAATAAAAGTTTTTTAAATTTTAATACCACCCCAGTAAAATTTTTTATTAAAATATAAATTTAATTATTCTTTTTAATTTATAATTAACAAAAataaagatctatagggtcttctcgtcttttaattacattttaa	Aedes aegypti isolate 4a 16S ribosomal RNA gene, partial sequence; mitochondrial
KX085416	249	species	7159	Aedes aegypti	7158	Aedes	7157	Culicidae	2759	Eukaryota	R	ACGCTGTTATCCCTAAGGTAACTTA	0	GACGAGAAGACCCTATAGATCTTTAT	0	145	ttttgtcgataagaactctaaaaaaaaattacgctgttatccctaaggtaacttaATTTTTTAATCAATATAACTGGATCAAATATTCATAAATTAATGTAAATTGAAAATAAAAGTTTTTTAAATTTTAATACCACCCCAGTAAAATTTTTTATTAAAATATAAATTTAATTATTCTTTTTAATTTATAATTAACAAAAataaagatctatagggtcttctcgtcttttaattacattttaact	Aedes aegypti 16S ribosomal RNA gene, partial sequence; mitochondrial
DQ397921	804	species	7160	Aedes albopictus	7158	Aedes	7157	Culicidae	2759	Eukaryota	R	ACGCTGTTATCCCTAAGGTAACTTA	0	GACGAGAAGACCCTATAGATCTTTAT	0	145	ttttgtcgataagaactctaaaaaaaaattacgctgttatccctaaggtaacttaATTTTTTAATCAATAAAATTGGATCAAATATACATATATTAATGTAAACAAATAATAAAAGTTAATTAAATTTTAATACCACCCCAGTAAAATTTTTTATAAAACTATAAATTTAATTATTCTTTTTAACTTATAATTAAAAAAAataaagatctatagggtcttctcgtcttttaattatattttaactttttaattaaa	Aedes albopictus isolate A21 16S ribosomal RNA gene, partial sequence; mitochondrial
AF034476	457	species	7176	Culex quinquefasciatus	7174	Culex	7157	Culicidae	2759	Eukaryota	R	ACGCTGTAGTGCCTAAGGTAACTTA	3	GACGAGAAGACCCTATAGATCTTTAT	0	145	ttttctcgatatgaactctaaaaaaaaattacgctgtagtgcctaaggtaacttaAATTTTTAATCAATAAAACTGGATCATTTATTCATATATTTATGTTAATAAATTTTAAAAGTTTTTTAAATTTTAATATCACCCCAATAAAATTTTTTATTAAATTATAAATTTTAAAATTCTTTTTAATTTATAAATAACAAAAataaagatctatagggtcttctcgtcctttaatttaattttaactttttaattaaa	Culex pipiens quinquefasciatus 16S ribosomal RNA gene, mitochondrial gene for mitochondrial RNA, partial sequence
DQ202300	530	species	7176	Culex quinquefasciatus	7174	Culex	7157	Culicidae	2759	Eukaryota	R	ACGCTGTTATCCCTAAGGTAACTTA	0	GACGAGAAGACCCTATAGATCTTTAT	0	145	ttttgtcgatatgaactctaaaaaaaaattacgctgttatccctaaggtaacttaAATTTTTAATCAATAAAACTGGATCATTTATTCATATATTTATGTTAATAAATTTTAAAAGTTTTTTAAATTTTAATATCACCCCAATAAAATTTTTTATTAAATTATAAATTTTAAAATTCTTTTTAATTTATAAATAACAAAAataaagatctatagggtcttctcgtcctttaattttattttaactttttaattaaa	Culex pipiens quinquefasciatus 16S ribosomal RNA gene, partial sequence; mitochondrial
EF593017	563	species	7176	Culex quinquefasciatus	7174	Culex	7157	Culicidae	2759	Eukaryota	R	ACGCTGTTATCCCTAAGGTAACTTA	0	GACGAGAAGACCCTATAGATCTTTAT	0	145	ttttgtcgatatgaactctaaaaaaaaattacgctgttatccctaaggtaacttaAATTTTTAATCAATAAAACTGGATCATTTATTCATATATTTATGTTAATAAATTTTAAAAGTTTTTTAAATTTTAATATCACCCCAATAAAATTTTTTATTAAATTATAAATTTTAAAATTCTTTTTAATTTATAAATAACAAAAataaagatctatagggtcttctcgtcctttaattttattttaactttttaattaaa	Culex pipiens quinquefasciatus 16S ribosomal RNA gene, partial sequence; mitochondrial
EU283340	364	species	7176	Culex quinquefasciatus	7174	Culex	7157	Culicidae	2759	Eukaryota	R	CGCTGGTTATCCCTAAGGTAACTTA	5	GACGAGAAGACCCTATAGATCTTTAT	0	145	tttacgctggttatccctaaggtaacttaAATTTTTAATCAATAAAACTGGATCATTTATTCATATATTTATGTTAATAAATTTTAAAAGTTTTTTAAATTTTAATATCACCCCAATAAAATTTTTTATTAAATTATAAATTTTAAAATTCTTTTTAATTTATAAATAACAAAAataaagatctatagggtcttctcgtcctttaattttattttaactttttaattaaa	Culex pipiens quinquefasciatus strain A74 16S ribosomal RNA gene, partial sequence; mitochondrial
EU339128	408	species	7176	Culex quinquefasciatus	7174	Culex	7157	Culicidae	2759	Eukaryota	R	ACGCTGTTATCCCTAAGGTAACTTA	0	GACGAGAAGACCCTATAGATCTTTAT	0	145	ttttgtcgatatgaactctaaaaaaaaattacgctgttatccctaaggtaacttaAATTTTTAATCAATAAAACTGGATCATTTATTCATATATTTATGTTAATAAATTTTAAAAGTTTTTTAAATTTTAATATCACCCCAATAAAATTTTTTATTAAATTATAAATTTTAAAATTCTTTTTAATTTATAAATAACAAAAataaagatctatagggtcttctcgtcctttaattttattttaactttttaattaaa	Culex quinquefasciatus isolate A187 16S ribosomal RNA gene, partial sequence; mitochondrial
EU339129	365	species	7176	Culex quinquefasciatus	7174	Culex	7157	Culicidae	2759	Eukaryota	R	ACGCTGTTATCCCTAAGGTAACTTA	0	GACGAGAAGACCCTATAGATCTTTAT	0	145	ttttgtcgatatgaactctaaaaaaaaattacgctgttatccctaaggtaacttaAATTTTTAATCAATAAAACTGGATCATTTATTCATATATTTATGTTAATAAATTTTAAAAGTTTTTTAAATTTTAATATCACCCCAATAAAATTTTTTATTAAATTATAAATTTTAAAATTCTTTTTAATTTATAAATAACAAAAataaagatctatagggtcttctcgtcctttaattttattttaactttttaattaaa	Culex quinquefasciatus isolate A15 16S ribosomal RNA gene, partial sequence; mitochondrial
EU339130	319	species	7176	Culex quinquefasciatus	7174	Culex	7157	Culicidae	2759	Eukaryota	R	ACGCTGTTATCCCTAAGGTAACTTA	0	GACGAGAAGACCCTATAGATCTTTAT	0	145	tttacgctgttatccctaaggtaacttaAATTTTTAATCAATAAAACTGGATCATTTATTCATATATTTATGTTAATAAATTTTAAAAGTTTTTTAAATTTTAATATCACCCCAATAAAATTTTTTATTAAATTATAAATTTTAAAATTCTTTTTAATTTATAAATAACAAAAataaagatctatagggtcttctcgtcctttaattttattttaactttttaattaaa	Culex quinquefasciatus isolate A133 16S ribosomal RNA gene, partial sequence; mitochondrial
EU339132	333	species	7176	Culex quinquefasciatus	7174	Culex	7157	Culicidae	2759	Eukaryota	R	ACGCTGTTATCCCTAAGGTAACTTA	0	GACGAGAAGACCCTATAGATCTTTAT	0	145	ttttgtcgatatgaactctaaaaaaaaattacgctgttatccctaaggtaacttaAATTTTTAATCAATAAAACTGGATCATTTATTCATATATTTATGTTAATAAATTTTAAAAGTTTTTTAAATTTTAATATCACCCCAATAAAATTTTTTATTAAATTATAAATTTTAAAATTCTTTTTAATTTATAAATAACAAAAataaagatctatagggtcttctcgtcctttaattttattttaactttttaa	Culex quinquefasciatus isolate A36 16S ribosomal RNA gene, partial sequence; mitochondrial
EU339133	364	species	7176	Culex quinquefasciatus	7174	Culex	7157	Culicidae	2759	Eukaryota	R	ACGCTGTTATCCCTAAGGTAACTTA	0	GACGAGAAGACCCTATAGATCTTTAT	0	145	aaaaaaaaattacgctgttatccctaaggtaacttaAATTTTTAATCAATAAAACTGGATCATTTATTCATATATTTATGTTAATAAATTTTAAAAGTTTTTTAAATTTTAATATCACCCCAATAAAATTTTTTATTAAATTATAAATTTTAAAATTCTTTTTAATTTATAAATAACAAAAataaagatctatagggtcttctcgtcctttaattttattttaactttttaattaaa	Culex quinquefasciatus isolate A19 16S ribosomal RNA gene, partial sequence; mitochondrial
EU339134	451	species	7176	Culex quinquefasciatus	7174	Culex	7157	Culicidae	2759	Eukaryota	R	ACGCTGTTATCCCTAAGGTAACTTA	0	GACGAGAAGACCCTATAGATCTTTAT	0	145	ttttgtcgatatgaactctaaaaaaaaattacgctgttatccctaaggtaacttaAATTTTTAATCAATAAAACTGGATCATTTATTCATATATTTATGTTAATAAATTTTAAAAGTTTTTTAAATTTTAATATCACCCCAATAAAATTTTTTATTAAATTATAAATTTTAAAATTCTTTTTAATTTATAAATAACAAAAataaagatctatagggtcttctcgtcctttaattttattttaactttttaattaaa	Culex quinquefasciatus isolate A144 16S ribosomal RNA gene, partial sequence; mitochondrial
EU339135	473	species	7176	Culex quinquefasciatus	7174	Culex	7157	Culicidae	2759	Eukaryota	R	ACGCTGTTATCCCTAAGGTAACTTA	0	GACGAGAAGACCCTATAGATCTTTAT	0	145	ttttgtcgatatgaactctaaaaaaaaattacgctgttatccctaaggtaacttaAATTTTTAATCAATAAAACTGGATCATTTATTCATATATTTATGTTAATAAATTTTAAAAGTTTTTTAAATTTTAATATCACCCCAATAAAATTTTTTATTAAATTATAAATTTTAAAATTCTTTTTAATTTATAAATAACAAAAataaagatctatagggtcttctcgtcctttaattttattttaactttttaattaaa	Culex quinquefasciatus isolate A190 16S ribosomal RNA gene, partial sequence; mitochondrial
EU339137	433	species	7176	Culex quinquefasciatus	7174	Culex	7157	Culicidae	2759	Eukaryota	R	ACGCTGTTATCCCTAAGGTAACTTA	0	GACGAGAAGACCCTATAGATCTTTAT	0	145	ttttgtcgatatgaactctaaaaaaaaattacgctgttatccctaaggtaacttaAATTTTTAATCAATAAAACTGGATCATTTATTCATATATTTATGTTAATAAATTTTAAAAGTTTTTTAAATTTTAATATCACCCCAATAAAATTTTTTATTAAATTATAAATTTTAAAATTCTTTTTAATTTATAAATAACAAAAataaagatctatagggtcttctcgtcctttaattttattttaactttttaattaaa	Culex quinquefasciatus isolate A7 16S ribosomal RNA gene, partial sequence; mitochondrial
EU339138	442	species	7176	Culex quinquefasciatus	7174	Culex	7157	Culicidae	2759	Eukaryota	R	ACGCTGTTATCCCTAAGGTAACTTA	0	GACGAGAAGACCCTATAGATCTTTAT	0	145	ttttgtcgatatgaactctaaaaaaaaattacgctgttatccctaaggtaacttaAATTTTTAATCAATAAAACTGGATCATTTATTCATATATTTATGTTAATAAATTTTAAAAGTTTTTTAAATTTTAATATCACCCCAATAAAATTTTTTATTAAATTATAAATTTTAAAATTCTTTTTAATTTATAAATAACAAAAataaagatctatagggtcttctcgtcctttaattttattttaactttttaattaaa	Culex quinquefasciatus isolate A22 16S ribosomal RNA gene, partial sequence; mitochondrial
EU339139	367	species	7176	Culex quinquefasciatus	7174	Culex	7157	Culicidae	2759	Eukaryota	R	ACGCTGTTATCCCTAAGGTAACTTA	0	GACGAGAAGACCCTATAGATCTTTAT	0	145	ttttgtcgatatgaactctaaaaaaaaattacgctgttatccctaaggtaacttaAATTTTTAATCAATAAAACTGGATCATTTATTCATATATTTATGTTAATAAATTTTAAAAGTTTTTTAAATTTTAATATCACCCCAATAAAATTTTTTATTAAATTATAAATTTTAAAATTCTTTTTAATTTATAAATAACAAAAataaagatctatagggtcttctcgtcctttaattttattttaactttttaattaaa	Culex quinquefasciatus isolate A4 16S ribosomal RNA gene, partial sequence; mitochondrial
EU339140	393	species	7176	Culex quinquefasciatus	7174	Culex	7157	Culicidae	2759	Eukaryota	R	ACGCTGTTATCCCTAAGGTAACTTA	0	GACGAGAAGACCCTATAGATCTTTAT	0	145	ttttgtcgatatgaactctaaaaaaaaattacgctgttatccctaaggtaacttaAATTTTTAATCAATAAAACTGGATCATTTATTCATATATTTATGTTAATAAATTTTAAAAGTTTTTTAAATTTTAATATCACCCCAATAAAATTTTTTATTAAATTATAAATTTTAAAATTCTTTTTAATTTATAAATAACAAAAataaagatctatagggtcttctcgtcctttaattttattttaactttttaattaaa	Culex quinquefasciatus isolate A181 16S ribosomal RNA gene, partial sequence; mitochondrial
EU339141	440	species	7176	Culex quinquefasciatus	7174	Culex	7157	Culicidae	2759	Eukaryota	R	ACGCTGTTATCCCTAAGGTAACTTA	0	GACGAGAAGACCCTATAGATCTTTAT	0	145	ttttgtcgatatgaactctaaaaaaaaattacgctgttatccctaaggtaacttaAATTTTTAATCAATAAAACTGGATCATTTATTCATATATTTATGTTAATAAATTTTAAAAGTTTTTTAAATTTTAATATCACCCCAATAAAATTTTTTATTAAATTATAAATTTTAAAATTCTTTTTAATTTATAAATAACAAAAataaagatctatagggtcttctcgtcctttaattttattttaactttttaattaaa	Culex quinquefasciatus isolate A160 16S ribosomal RNA gene, partial sequence; mitochondrial
EU339143	435	species	7176	Culex quinquefasciatus	7174	Culex	7157	Culicidae	2759	Eukaryota	R	ACGCTGTTATCCCTAAGGTAACTTA	0	GACGAGAAGACCCTATAGATCTTTAT	0	145	ttttgtcgatatgaactctaaaaaaaaattacgctgttatccctaaggtaacttaAATTTTTAATCAATAAAACTGGATCATTTATTCATATATTTATGTTAATAAATTTTAAAAGTTTTTTAAATTTTAATATCACCCCAATAAAATTTTTTATTAAATTATAAATTTTAAAATTCTTTTTAATTTATAAATAACAAAAataaagatctatagggtcttctcgtcctttaattttattttaactttttaattaaa	Culex quinquefasciatus isolate A16 16S ribosomal RNA gene, partial sequence; mitochondrial
EU339144	334	species	7176	Culex quinquefasciatus	7174	Culex	7157	Culicidae	2759	Eukaryota	R	ACGCTGTTATCCCTAAGGTAACTTA	0	GACGAGAAGACCCTATAGATCTTTAT	0	145	ttacgctgttatccctaaggtaacttaAATTTTTAATCAATAAAACTGGATCATTTATTCATATATTTATGTTAATAAATTTTAAAAGTTTTTTAAATTTTAATATCACCCCAATAAAATTTTTTATTAAATTATAAATTTTAAAATTCTTTTTAATTTATAAATAACAAAAataaagatctatagggtcttctcgtcctttaattttattttaactttttaattaaa	Culex quinquefasciatus isolate A77 16S ribosomal RNA gene, partial sequence; mitochondrial
EU339146	472	species	7176	Culex quinquefasciatus	7174	Culex	7157	Culicidae	2759	Eukaryota	R	ACGCTGTTATCCCTAAGGTAACTTA	0	GACGAGAAGACCCTATAGATCTTTAT	0	145	ttttgtcgatatgaactctaaaaaaaaattacgctgttatccctaaggtaacttaAATTTTTAATCAATAAAACTGGATCATTTATTCATATATTTATGTTAATAAATTTTAAAAGTTTTTTAAATTTTAATATCACCCCAATAAAATTTTTTATTAAATTATAAATTTTAAAATTCTTTTTAATTTATAAATAACAAAAataaagatctatagggtcttctcgtcctttaattttattttaactttttaattaaa	Culex quinquefasciatus isolate A12 16S ribosomal RNA gene, partial sequence; mitochondrial
EU555413	532	species	7176	Culex quinquefasciatus	7174	Culex	7157	Culicidae	2759	Eukaryota	R	ACGCTGTTATCCCTAAGGTAACTTA	0	GACGAGAAGACCCTATAGATCTTTAT	0	145	ttttgtcgatatgaactctaaaaaaaaattacgctgttatccctaaggtaacttaAATTTTTAATCAATAAAACTGGATCATTTATTCATATATTTATGTTAATAAATTTTAAAAGTTTTTTAAATTTTAATATCACCCCAATAAAATTTTTTATTAAATTATAAATTTTAAAATTCTTTTTAATTTATAAATAACAAAAataaagatctatagggtcttctcgtcctttaattttattttaactttttaattaaa	Culex quinquefasciatus from India: Bhatinda 16S ribosomal RNA gene, partial sequence; mitochondrial
EU555414	530	species	7176	Culex quinquefasciatus	7174	Culex	7157	Culicidae	2759	Eukaryota	R	ACGCTGTTATCCCTAAGGTAACTTA	0	GACGAGAAGACCCTATAGATCTTTAT	0	145	ttttgtcgatatgaactctaaaaaaaaattacgctgttatccctaaggtaacttaAATTTTTAATCAATAAAACTGGATCATTTATTCATATATTTATGTTAATAAATTTTAAAAGTTTTTTAAATTTTAATATCACCCCAATAAAATTTTTTATTAAATTATAAATTTTAAAATTCTTTTTAATTTATAAATAACAAAAataaagatctatagggtcttctcgtcctttaattttattttaactttttaattaaa	Culex quinquefasciatus from India: Bikaner 16S ribosomal RNA gene, partial sequence; mitochondrial
EU555415	531	species	7176	Culex quinquefasciatus	7174	Culex	7157	Culicidae	2759	Eukaryota	R	ACGCTGTTATCCCTAAGGTAACTTA	0	GACGAGAAGACCCTATAGATCTTTAT	0	145	ttttgtcgatatgaactctaaaaaaaaattacgctgttatccctaaggtaacttaAATTTTTAATCAATAAAACTGGATCATTTATTCATATATTTATGTTAATAAATTTTAAAAGTTTTTTAAATTTTAATATCACCCCAATAAAATTTTTTATTAAATTATAAATTTTAAAATTCTTTTTAATTTATAAATAACAAAAataaagatctatagggtcttctcgtcctttaattttattttaactttttaattaaa	Culex quinquefasciatus from India: Jodhpur 16S ribosomal RNA gene, partial sequence; mitochondrial
EU555416	533	species	7176	Culex quinquefasciatus	7174	Culex	7157	Culicidae	2759	Eukaryota	R	ACGCTGTTATCCCTAAGGTAACTTA	0	GACGAGAAGACCCTATAGATCTTTAT	0	145	ttttgtcgatatgaactctaaaaaaaaattacgctgttatccctaaggtaacttaAATTTTTAATCAATAAAACTGGATCATTTATTCATATATTTATGTTAATAAATTTTAAAAGTTTTTTAAATTTTAATATCACCCCAATAAAATTTTTTATTAAATTATAAATTTTAAAATTCTTTTTAATTTATAAATAACAAAAataaagatctatagggtcttctcgtcctttaattttattttaactttttaattaaa	Culex quinquefasciatus from India: Jamnagar 16S ribosomal RNA gene, partial sequence; mitochondrial
EU711082	491	species	7176	Culex quinquefasciatus	7174	Culex	7157	Culicidae	2759	Eukaryota	R	ACGCTGTTATCCCTAAGGTAACTTA	0	GACGAGAAGACCCTATAGATCTTTAT	0	145	ttttgtcgatatgaactctaaaaaaaaattacgctgttatccctaaggtaacttaAATTTTTAATCAATAAAACTGGATCATTTATTCATATATTTATGTTAATAAATTTTAAAAGTTTTTTAAATTTTAATATCACCCCAATAAAATTTTTTATTAAATTATAAATTTTAAAATTCTTTTTAATTTATAAATAACAAAAataaagatctatagggtcttctcgtcctttaattttattttaactttttaattaaa	Culex quinquefasciatus isolate A-35 16S ribosomal RNA gene, partial sequence; mitochondrial
EU711083	485	species	7176	Culex quinquefasciatus	7174	Culex	7157	Culicidae	2759	Eukaryota	R	ACGCTGTTATCCCTAAGGTAACTTA	0	GACGAGAAGACCCTATAGATCTTTAT	0	145	ttttgtcgatatgaactctaaaaaaaaattacgctgttatccctaaggtaacttaAATTTTTAATCAATAAAACTGGATCATTTATTCATATATTTATGTTAATAAATTTTAAAAGTTTTTTAAATTTTAATATCACCCCAATAAAATTTTTTATTAAATTATAAATTTTAAAATTCTTTTTAATTTATAAATAACAAAAataaagatctatagggtcttctcgtcctttaattttattttaactttttaattaaa	Culex quinquefasciatus isolate A-40 16S ribosomal RNA gene, partial sequence; mitochondrial
EU711084	450	species	7176	Culex quinquefasciatus	7174	Culex	7157	Culicidae	2759	Eukaryota	R	ACGCTGTTATCCCTAAGGTAACTTA	0	GACGAGAAGACCCTATAGATCTTTAT	0	145	ttttgtcgatatgaactctaaaaaaaaattacgctgttatccctaaggtaacttaAATTTTTAATCAATAAAACTGGATCATTTATTCATATATTTATGTTAATAAATTTTAAAAGTTTTTTAAATTTTAATATCACCCCAATAAAATTTTTTATTAAATTATAAATTTTAAAATTCTTTTTAATTTATAAATAACAAAAataaagatctatagggtcttctcgtcctttaattttattttaactttttaattaaa	Culex quinquefasciatus isolate A-52 16S ribosomal RNA gene, partial sequence; mitochondrial
EU711085	491	species	7176	Culex quinquefasciatus	7174	Culex	7157	Culicidae	2759	Eukaryota	R	ACGCTGTTATCCCTAAGGTAACTTA	0	GACGAGAAGACCCTATAGATCTTTAT	0	145	ttttgtcgatatgaactctaaaaaaaaattacgctgttatccctaaggtaacttaAATTTTTAATCAATAAAACTGGATCATTTATTCATATATTTATGTTAATAAATTTTAAAAGTTTTTTAAATTTTAATATCACCCCAATAAAATTTTTTATTAAATTATAAATTTTAAAATTCTTTTTAATTTATAAATAACAAAAataaagatctatagggtcttctcgtcctttaattttattttaactttttaattaaa	Culex quinquefasciatus isolate A-59 16S ribosomal RNA gene, partial sequence; mitochondrial
EU711086	471	species	7176	Culex quinquefasciatus	7174	Culex	7157	Culicidae	2759	Eukaryota	R	ACGCTGTTATCCCTAAGGTAACTTA	0	GACGAGAAGACCCTATAGATCTTTAT	0	145	ttttgtcgatatgaactctaaaaaaaaattacgctgttatccctaaggtaacttaAATTTTTAATCAATAAAACTGGATCATTTATTCATATATTTATGTTAATAAATTTTAAAAGTTTTTTAAATTTTAATATCACCCCAATAAAATTTTTTATTAAATTATAAATTTTAAAATTCTTTTTAATTTATAAATAACAAAAataaagatctatagggtcttctcgtcctttaattttattttaactttttaattaaa	Culex quinquefasciatus isolate A-66 16S ribosomal RNA gene, partial sequence; mitochondrial
EU711087	491	species	7176	Culex quinquefasciatus	7174	Culex	7157	Culicidae	2759	Eukaryota	R	ACGCTGTTATCCCTAAGGTAACTTA	0	GACGAGAAGACCCTATAGATCTTTAT	0	145	ttttgtcgatatgaactctaaaaaaaaattacgctgttatccctaaggtaacttaAATTTTTAATCAATAAAACTGGATCATTTATTCATATATTTATGTTAATAAATTTTAAAAGTTTTTTAAATTTTAATATCACCCCAATAAAATTTTTTATTAAATTATAAATTTTAAAATTCTTTTTAATTTATAAATAACAAAAataaagatctatagggtcttctcgtcctttaattttattttaactttttaattaaa	Culex quinquefasciatus isolate A-84 16S ribosomal RNA gene, partial sequence; mitochondrial
EU711088	490	species	7176	Culex quinquefasciatus	7174	Culex	7157	Culicidae	2759	Eukaryota	R	ACGCTGTTATCCCTAAGGTAACTTA	0	GACGAGAAGACCCTATAGATCTTTAT	0	145	ttttgtcgatatgaactctaaaaaaaaattacgctgttatccctaaggtaacttaAATTTTTAATCAATAAAACTGGATCATTTATTCATATATTTATGTTAATAAATTTTAAAAGTTTTTTAAATTTTAATATCACCCCAATAAAATTTTTTATTAAATTATAAATTTTAAAATTCTTTTTAATTTATAAATAACAAAAataaagatctatagggtcttctcgtcctttaattttattttaactttttaattaaa	Culex quinquefasciatus isolate A-128 16S ribosomal RNA gene, partial sequence; mitochondrial
EU711089	491	species	7176	Culex quinquefasciatus	7174	Culex	7157	Culicidae	2759	Eukaryota	R	ACGCTGTTATCCCTAAGGTAACTTA	0	GACGAGAAGACCCTATAGATCTTTAT	0	145	ttttgtcgatatgaactctaaaaaaaaattacgctgttatccctaaggtaacttaAATTTTTAATCAATAAAACTGGATCATTTATTCATATATTTATGTTAATAAATTTTAAAAGTTTTTTAAATTTTAATATCACCCCAATAAAATTTTTTATTAAATTATAAATTTTAAAATTCTTTCTCATTTATAAATAACAAAAataaagatctatagggtcttctcgtcctttaattttattttaactttttcactcac	Culex quinquefasciatus isolate A-131 16S ribosomal RNA gene, partial sequence; mitochondrial
EU711090	459	species	7176	Culex quinquefasciatus	7174	Culex	7157	Culicidae	2759	Eukaryota	R	ACGCTGTTATCCCTAAGGTAACTTA	0	GACGAGAAGACCCTATAGATCTTTAT	0	145	ttttgtcgatatgaactctaaaaaaaaattacgctgttatccctaaggtaacttaAATTTTTAATCAATAAAACTGGATCATTTATTCATATATTTATGTTAATAAATTTTAAAAGTTTTTTAAATTTTAATATCACCCCAATAAAATTTTTTATTAAATTATAAATTTTAAAATTCTTTTTAATTTATAAATAACAAAAataaagatctatagggtcttctcgtcctttaattttattttaactttttaattaaa	Culex quinquefasciatus isolate A-137 16S ribosomal RNA gene, partial sequence; mitochondrial
EU711091	491	species	7176	Culex quinquefasciatus	7174	Culex	7157	Culicidae	2759	Eukaryota	R	ACGCTGTTATCCCTAAGGTAACTTA	0	GACGAGAAGACCCTATAGATCTTTAT	0	145	ttttgtcgatatgaactctaaaaaaaaattacgctgttatccctaaggtaacttaAATTTTTAATCAATAAAACTGGATCATTTATTCATATATTTATGTTAATAAATTTTAAAAGTTTTTTAAATTTTAATATCACCCCAATAAAATTTTTTATTAAATTATAAATTTTAAAATTCTTTTTAATTTATAAATAACAAAAataaagatctatagggtcttctcgtcctttaattttattttaactttttaattaaa	Culex quinquefasciatus isolate A-169 16S ribosomal RNA gene, partial sequence; mitochondrial
EU711092	487	species	7176	Culex quinquefasciatus	7174	Culex	7157	Culicidae	2759	Eukaryota	R	ACGCTGTTATCCCTAAGGTAACTTA	0	GACGAGAAGACCCTATAGATCTTTAT	0	145	ttttgtcgatatgaactctaaaaaaaaattacgctgttatccctaaggtaacttaAATTTTTAATCAATAAAACTGGATCATTTATTCATATATTTATGTTAATAAATTTTAAAAGTTTTTTAAATTTTAATATCACCCCAATAAAATTTTTTATTAAATTATAAATTTTAAAATTCTTTTTAATTTATAAATAACAAAAataaagatctatagggtcttctcgtcctttaattttattttaactttttaattaaa	Culex quinquefasciatus isolate A-173 16S ribosomal RNA gene, partial sequence; mitochondrial
EU711093	490	species	7176	Culex quinquefasciatus	7174	Culex	7157	Culicidae	2759	Eukaryota	R	ACGCTGTTATCCCTAAGGTAACTTA	0	GACGAGAAGACCCTATAGATCTTTAT	0	145	ttttgtcgatatgaactctaaaaaaaaattacgctgttatccctaaggtaacttaAATTTTTAATCAATAAAACTGGATCATTTATTCATATATTTATGTTAATAAATTTTAAAAGTTTTTTAAATTTTAATATCACCCCAATAAAATTTTTTATTAAATTATAAATTTTAAAATTCTTTTTAATTTATAAATAACAAAAataaagatctatagggtcttctcgtcctttaattttattttaactttttaattaaa	Culex quinquefasciatus isolate A-177 16S ribosomal RNA gene, partial sequence; mitochondrial
EU711094	488	species	7176	Culex quinquefasciatus	7174	Culex	7157	Culicidae	2759	Eukaryota	R	ACGCTGTTATCCCTAAGGTAACTTA	0	GACGAGAAGACCCTATAGATCTTTAT	0	145	ttttgtcgatatgaactctaaaaaaaaattacgctgttatccctaaggtaacttaAATTTTTAATCAATAAAACTGGATCATTTATTCATATATTTATGTTAATAAATTTTAAAAGTTTTTTAAATTTTAATATCACCCCAATAAAATTTTTTATTAAATTATAAATTTTAAAATTCTTTTTAATTTATAAATAACAAAAataaagatctatagggtcttctcgtcctttaattttattttaactttttaattaaa	Culex quinquefasciatus isolate A-263 16S ribosomal RNA gene, partial sequence; mitochondrial
EU711095	460	species	7176	Culex quinquefasciatus	7174	Culex	7157	Culicidae	2759	Eukaryota	R	ACGCTGTTATCCCTAAGGTAACTTA	0	GACGAGAAGACCCTATAGATCTTTAT	0	145	ttttgtcgatatgaactctaaaaaaaaattacgctgttatccctaaggtaacttaAATTTTTAATCAATAAAACTGGATCATTTATTCATATATTTATGTTAATAAATTTTAAAAGTTTTTTAAATTTTAATATCACCCCAATAAAATTTTTTATTAAATTATAAATTTTAAAATTCTTTTTAATTTATAAATAACAAAAataaagatctatagggtcttctcgtcctttaattttattttaactttttaattaaa	Culex quinquefasciatus isolate A-266 16S ribosomal RNA gene, partial sequence; mitochondrial
EU711096	434	species	7176	Culex quinquefasciatus	7174	Culex	7157	Culicidae	2759	Eukaryota	R	ACGCTGTTATCCCTAAGGTAACTTA	0	GACGAGAAGACCCTATAGATCTTTAT	0	145	ttttgtcgatatgaactctaaaaaaaaattacgctgttatccctaaggtaacttaATTTTTTAATCAATAAAACTGGATCATTTATTCATATATTTATGTTAATAAATTTTAAAAGTTTTTTAAATTTTAATATCACCCCAATAAAATTTTTTATTAAATTATAAATTTTAAAATTCTTTTTAATTTATAAATAACAAAAataaagatctatagggtcttctcgtcctttaattttattttaactttttaattaaa	Culex quinquefasciatus isolate A-267 16S ribosomal RNA gene, partial sequence; mitochondrial
EU711097	460	species	7176	Culex quinquefasciatus	7174	Culex	7157	Culicidae	2759	Eukaryota	R	ACGCTGTTATCCCTAAGGTAACTTA	0	GACGAGAAGACCCTATAGATCTTTAT	0	145	ttttgtcgatatgaactctaaaaaaaaattacgctgttatccctaaggtaacttaATTTTTTAATCAATAAAACTGGATCATTTATTCATATATTTATGTTAATAAATTTTAAAAGTTTTTTAAATTTTAATATCACCCCAATAAAATTTTTTATTAAATTATAAATTTTAAAATTCTTTTTAATTTATAAATAACAAAAataaagatctatagggtcttctcgtcctttaattttattttaactttttaattaaa	Culex quinquefasciatus isolate A-270 16S ribosomal RNA gene, partial sequence; mitochondrial
EU711098	481	species	7176	Culex quinquefasciatus	7174	Culex	7157	Culicidae	2759	Eukaryota	R	ACGCTGTTATCCCTAAGGTAACTTA	0	GACGAGAAGACCCTATAGATCTTTAT	0	145	ttttgtcgatatgaactctaaaaaaaaattacgctgttatccctaaggtaacttaAATTTTTAATCAATAAAACTGGATCATTTATTCATATATTTATGTTAATAAATTTTAAAAGTTTTTTAAATTTTAATATCACCCCAATAAAATTTTTTATTAAATTATAAATTTTAAAATTCTTTTTAATTTATAAATAACAAAAataaagatctatagggtcttctcgtcctttaattttattttaactttttaattaaa	Culex quinquefasciatus isolate A-274 16S ribosomal RNA gene, partial sequence; mitochondrial
EU711099	461	species	7176	Culex quinquefasciatus	7174	Culex	7157	Culicidae	2759	Eukaryota	R	ACGCTGTTATCCCTAAGGTAACTTA	0	GACGAGAAGACCCTATAGATCTTTAT	0	145	ttttgtcgatatgaactctaaaaaaaaattacgctgttatccctaaggtaacttaAATTTTTAATCAATAAAACTGGATCATTTATTCATATATTTATGTTAATAAATTTTAAAAGTTTTTTAAATTTTAATATCACCCCAATAAAATTTTTTATTAAATTATAAATTTTAAAATTCTTTTTAATTTATAAATAACAAAAataaagatctatagggtcttctcgtcctttaattttattttaactttttaattaaa	Culex quinquefasciatus isolate A-365 16S ribosomal RNA gene, partial sequence; mitochondrial
EU711100	461	species	7176	Culex quinquefasciatus	7174	Culex	7157	Culicidae	2759	Eukaryota	R	ACGCTGTTATCCCTAAGGTAACTTA	0	GACGAGAAGACCCTATAGATCTTTAT	0	145	ttttgtcgatatgaactctaaaaaaaaattacgctgttatccctaaggtaacttaAATTTTTAATCAATAAAACTGGATCATTTATTCATATATTTATGTTAATAAATTTTAAAAGTTTTTTAAATTTTAATATCACCCCAATAAAATTTTTTATTAAATTATAAATTTTAAAATTCTTTTTAATTTATAAATAACAAAAataaagatctatagggtcttctcgtcctttaattttattttaactttttaattaaa	Culex quinquefasciatus isolate A-368 16S ribosomal RNA gene, partial sequence; mitochondrial
EU711101	461	species	7176	Culex quinquefasciatus	7174	Culex	7157	Culicidae	2759	Eukaryota	R	ACGCTGTTATCCCTAAGGTAACTTA	0	GACGAGAAGACCCTATAGATCTTTAT	0	145	ttttgtcgatatgaactctaaaaaaaaattacgctgttatccctaaggtaacttaAATTTTTAATCAATAAAACTGGATCATTTATTCATATATTTATGTTAATAAATTTTAAAAGTTTTTTAAATTTTAATATCACCCCAATAAAATTTTTTATTAAATTATAAATTTTAAAATTCTTTTTAATTTATAAATAACAAAAataaagatctatagggtcttctcgtcctttaattttattttaactttttaattaaa	Culex quinquefasciatus isolate A-373 16S ribosomal RNA gene, partial sequence; mitochondrial
KX524981	248	species	7176	Culex quinquefasciatus	7174	Culex	7157	Culicidae	2759	Eukaryota	R	ACGCTGTTATCCCTAAGGTAACTTA	0	GACGAGAAGACCCTATAGATCTTTAT	0	145	ttttgtcgataagaactctaaaaaaaaattacgctgttatccctaaggtaacttaAATTTTTAATCAATAAAACTGGATCATTTATTCATATATTTATGTTAATAAATTTTAAAAGTTTTTTAAATTTTAATATCACCCCAATAAAATTTTTTATTAAATTATAAATTTTAAAATTCTTTTTAATTTATAAATAACAAAAataaagatctatagggtcttctcgtcctttaattttattttaac	Culex quinquefasciatus isolate AqF 16S ribosomal RNA gene, partial sequence; mitochondrial
KX524982	251	species	7176	Culex quinquefasciatus	7174	Culex	7157	Culicidae	2759	Eukaryota	R	ACGCTGTTATCCCTAAGGTAACTTA	0	GACGAGAAGACCCTATAGATCTTTAT	0	145	ttttgtcgataagaactctaaaaaaaaattacgctgttatccctaaggtaacttaAATTTTTAATCAATAAAACTGGATCATTTATTCATATATTTATGTTAATAAATTTTAAAAGTTTTTTAAATTTTAATATCACCCCAATAAAATTTTTTATTAAATTATAAATTTTAAAATTCTTTTTAATTTATAAATAACAAAAataaagatctatagggtcttctcgtcctttaattttatttta	Culex quinquefasciatus isolate TqF 16S ribosomal RNA gene, partial sequence; mitochondrial
KX451138	247	species	7176	Culex quinquefasciatus	7174	Culex	7157	Culicidae	2759	Eukaryota	R	ACGCTGTTATCCCTAAGGTAACTTA	0	GACGAGAAGACCCTATAGATCTTTAT	0	145	ttttgtcgataagaactctaaaaaaaaattacgctgttatccctaaggtaacttaAATTTTTAATCAATAAAACTGGATCATTTATTCATATATTTATGTTAATAAATTTTAAAAGTTTTTTAAATTTTAATATCACCCCAATAAAATTTTTTATTAAATTATAAATTTTAAAATTCTTTTTAATTTATAAATAACAAAAataaagatctatagggtcttctcgtcctttaattttattttaac	Culex quinquefasciatus 16S ribosomal RNA gene, partial sequence; mitochondrial
AF034469	457	species	7178	Culex tritaeniorhynchus	7174	Culex	7157	Culicidae	2759	Eukaryota	R	ACGCTGTTATCCCTAAGGTAACTTA	0	GACGAGAAGACCCTATAGATCTTTAT	0	145	ttttctcgatatgaactctaaaaaaaaattacgctgttatccctaaggtaacttaATTTTTTAATCAATAAAACTGGATCATTTATTCATATATTTATGTTAATAAATTTTAAAAGTTTTTTAAATTTTAATATCACCCCAATAAAATTTTTTATTAAATTATAAATTTTAAAATTCTTTTTAATTTATAAATAACAAAAataaagatctatagggtcttctcgtcctttaattttattttaactttttaattaaa	Culex tritaeniorhynchus 16S ribosomal RNA gene, mitochondrial gene for mitochondrial RNA, partial sequence
EF593020	549	species	7178	Culex tritaeniorhynchus	7174	Culex	7157	Culicidae	2759	Eukaryota	R	ACGCTGTTATCCCTAAGGTAACTTA	0	GACGAGAAGACCCTATAGATCTTTAT	0	145	ttttgtcgatatgaactctaaaaaaaaattacgctgttatccctaaggtaacttaATTTTTTAATCAATAAAACTGGATCATTTATTCATATATTTATGTTAATAAATTTTAAAAGTTTTTTAAATTTTAATATCACCCCAATAAAATTTTTTATTAAATTATAAATTTTAAAATTCTTTTTAATTTATAAATAACAAAAataaagatctatagggtcttctcgtcctttaattttattttaactttttaattaaa	Culex tritaeniorhynchus 16S ribosomal RNA gene, partial sequence; mitochondrial
KX085417	251	species	7178	Culex tritaeniorhynchus	7174	Culex	7157	Culicidae	2759	Eukaryota	R	ACGCTGTTATCCCTAAGGTAACTTA	0	GACGAGAAGACCCTATAGATCTTTAT	0	145	ttttgtcgataagaactctaaaaaaaaattacgctgttatccctaaggtaacttaATTTTTTAATCAATAAAACTGGATCATTTATTCATATATTTATGTTAATAAATTTTAAAAGTTTTTTAAATTTTAATATCACCCCAATAAAATTTTTTATTAAATTATAAATTTTAAAATTCTTTTTAATTTATAAATAACAAAAataaagatctatagggtcttctcgtcctttaattttattttaacttt	Culex tritaeniorhynchus 16S ribosomal RNA gene, partial sequence; mitochondrial
DQ202295	503	species	30069	Anopheles stephensi	7164	Anopheles	7157	Culicidae	2759	Eukaryota	R	ACGCTGTTATCCCTAAGGTAACTTA	0	GACGAGAAGACCCTATAGATCTTTAT	0	144	ttttatcgatatgaactctctaaaaaaattacgctgttatccctaaggtaacttaAATTTTTAATCCATAAAATAGGATCTTTTATTCATAAATTTATGTAAATAAATAATAAAAGTTAATTTAATTTTAATACCACCCCAGTAAAATTTTATCTAAAATATAATTATTAAAATTCTTTATAAATTATAATTTATAAAAataaagatctatagggtcttctcgtcttttaattatattttaactttttaattaaa	Anopheles stephensi 16S ribosomal RNA gene, partial sequence; mitochondrial
AF373609	515	species	74873	Anopheles sinensis	7164	Anopheles	7157	Culicidae	2759	Eukaryota	D	ACGCTGTTATCCCTAAAGTAACTTA	1	GACGATAAGACCCTATAAAACTTTAT	3	146	tcttgtcgataagaactctcaaagaaaatcacgctgttatccctaaagtaacttaTACTTTTAATCCACAAAGAAGGATCACACACTAATTATAATTATTAAATTAAACAGACAGTTACACATTATATCTACATCTCCCCAACGAAATATAAGCCTAATAAAGCTACTTTTTACTCAAATTGTAAGCCAAATTAAACTTATataaagttttatagggtcttatcgtcccactaaataatttgagccttttcactcaa	Anopheles sinensis 16S ribosomal RNA gene, partial sequence; mitochondrial gene for mitochondrial product
MK825747	508	species	109668	Anopheles lesteri	7164	Anopheles	7157	Culicidae	2759	Eukaryota	R	ACGCTGTTATCCCTAAGGTAACTTA	0	GACGAGAAGACCCTATAGATCTTTAT	0	144	ttttatcgatatgaactctctaaaaaaattacgctgttatccctaaggtaacttaATTTTTTAATCCATAATACAGGATCTTTAATTCATAAATCAATGTTAAAAACAAATAAAAGTTAATTAAATTTTAATACCACCCCAGTAAAATTTTATCTAAAATATAAATTTTAAAATTCTTTATAATTTATAATTTATAAAAataaagatctatagggtcttctcgtcctttaatttaattttagctttttaactaaa	UNVERIFIED: Anopheles lesteri 16S ribosomal RNA-like gene, partial sequence; mitochondrial
AY049016	553	species	112268	Anopheles minimus	7164	Anopheles	7157	Culicidae	2759	Eukaryota	R	ACGCTGTTATCCCTAAGGTAACTTA	0	GACGAGAAGACCCTATAGATCTTTAT	0	144	ttttatcgatatgaactctctaaaaaaattacgctgttatccctaaggtaacttaAATTTTTAATCCATAAAACAGGATCTTTTATTCATAAATATATGTTAATAAATAATAAAAGTTAATTTAATTTTAATACCACCCCAATAAAATTTTATTTAAAATATAATTTTTAAAATTCTTTATAAATTATAATTTATAAAAataaagatctatagggtcttctcgtcttttaattatattttaactttttaattaaa	Anopheles minimus 16S ribosomal RNA gene, partial sequence; mitochondrial gene for mitochondrial product
AF402097	551	species	112268	Anopheles minimus	7164	Anopheles	7157	Culicidae	2759	Eukaryota	R	ACGCTGTTATCCCTAAGGTAACTTA	0	GACGAGAAGACCCTATAGATCTTTAT	0	144	ttttatcgatatgaactctctaaaaaaattacgctgttatccctaaggtaacttaAATTTTTAATCCATAAAACAGGATCTTTTATTCATAAATATATGTTAATAAATAATAAAAGTTAATTTAATTTTAATACCACCCCAATAAAATTTTATTTAAAATATAATTTTTAAAATTCTTTATAAATTATAATTTATAAAAataaagatctatagggtcttctcgtcttttaattatattttaactttttaattaaa	Anopheles minimus 16S ribosomal RNA gene, partial sequence; mitochondrial gene for mitochondrial product
KU880657	502	species	120870	Ochlerotatus caspius	190765	Ochlerotatus	7157	Culicidae	2759	Eukaryota	R	ACGCTGTTATCCCTAAGGTAACTTA	0	GACGAGAAGACCCTATAGATCTTTAT	0	145	ttttgtcgatatgaactctaaaaaaaaattacgctgttatccctaaggtaacttaATTTTTTAATCAATATAACTGGATCAATTATTCATATATTAATGTAAATAAATAATAAAAGTTATTTAAATTTTAATACCACCCCAGTAAAATTTTTTATTAAACTATAAATTTAATTATTCTTTTTAATTTATAATTAACAAAAataaagatctatagggtcttctcgtcctttaattacattttaactttttaattaaa	Ochlerotatus caspius isolate alsk-w044 16S ribosomal RNA gene, partial sequence; mitochondrial
KX085418	234	species	124917	Armigeres subalbatus	124916	Armigeres	7157	Culicidae	2759	Eukaryota	R	ACGCTGTTATCCCTAAGGTAACTTA	0	GACGAGAAGACCCTATAGATCTTTAT	0	146	ttttgtcgataagaactttaaaaaaaaattacgctgttatccctaaggtaacttaATTTTTTAATCAATATAATTGGATCAAATATTCATAAATTAATGTAATTTTTTTTATAAAAGTTAATTAAATTTTAATACCACCCCAGTAAAATTTTTATTTAGATAAAAATTTAATAATTCTTTTTAATTTTTATCTAAATAAAAataaagatctatagggtcttctcgtcttttaat	Armigeres subalbatus 16S ribosomal RNA gene, partial sequence; mitochondrial
DQ397915	803	species	140438	Aedes japonicus	7158	Aedes	7157	Culicidae	2759	Eukaryota	R	ACGCTGTTATCCCTAAGGTAACTTA	0	GACGAGAAGACCCTATAGATCTTTAT	0	145	ttttgtcgatatgaactctaaaaaaaaattacgctgttatccctaaggtaacttaATTTTTTAATCAATAAAACTGGATCAATTATTCATATATTAATGTAAATAAATTATAAAAGTTATTTAAATTTTAATACCACCCCAGCAAAATTTTTTATTAAATTATAAATTTAATTATTCTTTTTAATTTATAATTAAAAAAAataaagatctatagggtcttctcgtcctttaactacattttaactttttaattaaa	Ochlerotatus japonicus isolate A81 16S ribosomal RNA gene, partial sequence; mitochondrial
MK825745	509	species	254294	Anopheles belenrae	7164	Anopheles	7157	Culicidae	2759	Eukaryota	R	ACGCTGTTATCCCTAAGGTAACTTA	0	GACGAGAAGACCCTATAGATCTTTAT	0	144	ttttatcgatatgaactctctaaaaaaattacgctgttatccctaaggtaacttaATTTTTTAATCCATAATACAGGATCTTAAATTCATAAATCAATGTTAAAAATAAATAAAAGTTARTTAAATTTTAATACCACCCCAGTAAAATTTTATCTAAAATATAAATTTTAAAATTCTTTATAATTTATAATTTATAAAAataaagatctatagggtcttctcgtcctttaatttaattttagctttttaactaaa	UNVERIFIED: Anopheles belenrae 16S ribosomal RNA-like gene, partial sequence; mitochondrial
MK825748	509	species	261159	Anopheles sineroides	7164	Anopheles	7157	Culicidae	2759	Eukaryota	R	ACGCTGTTATCCCTAAGGTAACTTA	0	GACGAGAAGACCCTATAGATCTTTAT	0	144	ttttatcgatatgaactctctaaaaaaattacgctgttatccctaaggtaacttaATTTTTTAATCCATAATACAGGATCTTTAATTCATAAATCAATGTTAAAAATAAATAAAAGTTAATTAAATTTTAATACCACCCCAGTAAAATTTTATCTAAAATATAAATTTTAAAATTCTTTATAATTTATAATTTATAAAAataaagatctatagggtcttctcgtcctttaatttaattttagctttttaactaaa	UNVERIFIED: Anopheles sineroides 16S ribosomal RNA-like gene, partial sequence; mitochondrial
MK825746	509	species	296717	Anopheles kleini	7164	Anopheles	7157	Culicidae	2759	Eukaryota	R	ACGCTGTTATCCCTAAGGTAACTTA	0	GACGAGAAGACCCTATAGATCTTTAT	0	144	ttttatcgatatgaactctctaaaaaaattacgctgttatccctaaggtaacttaATTTTTTAATCCATAATACAGGATCTTAAATTCATAAATCAATGTTAAAAATAAATAAAAGTTAGTTAAATTTTAATACCACCCCAGTAAAATTTTATCTAAAATATAAATTTTAAAATTCTTTATAATTTATAATTTATAAAAataaagatctatagggtcttctcgtcctttaatttaattttagctttttaactaaa	UNVERIFIED: Anopheles kleini 16S ribosomal RNA-like gene, partial sequence; mitochondrial
KU880656	499	species	545656	Culex modestus	7174	Culex	7157	Culicidae	2759	Eukaryota	R	ACGCTGTTATCCCTAAGGTAACTTA	0	GACGAGAAGACCCTATAGATCTTTAT	0	145	ttttgtcgatatgaactctaaaaaaaaattacgctgttatccctaaggtaacttaAATTTTTAATCAATAAAACTGGATCATTTATTCATATATTAATGTTAAAAAATTTTAAAAGTTTTTTAAATTTTAATATCACCCCAATAAAATTTTTTATTAAATTATAAATTTTAAAATTCTTTTTAATTTATAAATAAAAAAAataaagatctatagggtcttctcgtcctttaattttattttaactttttaattaaa	Culex modestus isolate alsk-w024 16S ribosomal RNA gene, partial sequence; mitochondrial

## Sheet: COI-D2_shared_with_Krol
These are the available GenBank accessions that contain both the forward and reverse primers used herein to amplify D2. They have been trimmed to include only those species that are shared with the analogous dataset for Krol et al. 2019.
GenBank Accession	length of the original sequence	taxonomic rank	taxid	scientific name	taxid of the genus	genus	taxid of the family	family	taxid of the super kingdom	super kingdom	strand (direct or reverse)	target sequence of the first primer	number of mismatches for the first primer	target sequence of the second primer	number of mismatches for the second primer	length of the amplified fragment (excluding primers)	sequence	definition
JX070791	542	species	7168	Anopheles dirus	7164	Anopheles	7157	Culicidae	2759	Eukaryota	D	AAGCACTCTGAATAGAGAGTC	0	CTTTCCGTGTTTCAAGAC	3	427	aataccgccatgagtccgatagcgaacaagtaccgtgagggaaagttgaaaagcactctgaatagagagtcAAATAGTACGTGAAACTGCCTAGGGGAATCAAACCCGTTGAACTCAATGATCCGTGCGGCGATATTCAGCGGCGGCGCTCGCGCGCTGCCGTGCACTTATCCGCCCGCAGCCTACACGGACATCGCGATCCATTACCACGGGCACCGCCCCCTGCGGCGCGTGCAATTCCGGCACCCGAGGCCCCTGGCTCGTGGTGGACGGCTCCCTAGTAGGGTGCGGCTCGCACGCCGCGCCTCGAACGGGGGTTCCGAGCTGTTTCAGCAATGGAACGGCACGGGTCCGACCGAGCCCCGGTGTGCCGCCGGAAGAGAGTGATGGAGCTCACGA…	Anopheles dirus isolate D2_174B 28S ribosomal RNA gene, partial sequence
JX070802	531	species	74869	Anopheles maculatus	7164	Anopheles	7157	Culicidae	2759	Eukaryota	D	AAGCACTCTGAATAGAGAGTC	0	TGGTCCGTGTTTCAAGAC	0	410	aatactgccatgagaccgatagcgaacaagtaccgtgagggaaagttgaaaagcactctgaatagagagtcAAACAGTACGTGAAACTGCCTAGGGGACGCAAACCCGTTGAACTCAATGATCCGAGCGGCGATATTCAGCGGTGGCCGGCCCGTCCGGCTGCCGTGCACTTATCGACCCGCACCAAACGGACATCGCGATCCATTGCGCATCTGCGTGAGCATACCATTCCGGCATACGGCCCCTGGCTCGTGGTGGACGGCTCCCTAGTAGGGCGCGGCTTGGCGGCCGCCCCAAACGGGGGTCTCTGCGCCTTTCACACCCGAGAGGCGCGGGTCCGACCGAGCTCCGGGAGTGCCGCTGGAAGCACGATGGACCGTACGACCGGGGTCTAGGGAG…	Anopheles maculatus isolate D2_39 28S ribosomal RNA gene, partial sequence
KC177663	3440	species	7165	Anopheles gambiae	7164	Anopheles	7157	Culicidae	2759	Eukaryota	D	AAGCACTCTGAATAGAGAGTC	0	TGGTCCGTGTTTCAAGAC	0	402	aataccaccatgagtccgatagcgaacaagtaccgtgagggaaagttgaaaagcactctgaatagagagtcAAATAGTACGTGAAACTGCCTAGGGGTACAAACCCGTTGAACTCAATGATCCGGGCGGCGATATTCAGCGGTAAACTAGCAATTGCCGTGCACTTATCGATCCGCAGTAACGGACATCGCGATCCATTACAACAGCGGTTGGCCTCGTGCTAACGCTCCGGCATACACTGCCCCTAGCTCGTGGTGGACGGTCCCTCTGTAAGGGTAGGGTAGCTGCTCTACACTGACCGGGGATCTCCGCGCAGTCCTTCTGGAAGGCGAATGGGTCCGACCGAGCTCTGGTGTGCTGCTGGAAGGGTGATGGATTCTAACGAGAGGGGTAGTACCG…	Anopheles gambiae 28S ribosomal RNA gene, partial sequence
BX029704	1070	species	7165	Anopheles gambiae	7164	Anopheles	7157	Culicidae	2759	Eukaryota	R	AAGCACTCTGAATAGAGAGTC	0	TGGTCCGTGTTTCAAGAC	0	402	aataccaccatgagtccgatagcgaacaagtaccgtgagggaaagttgaaaagcactctgaatagagagtcAAATAGTACGTGAAACTGCCTAGGGGTACAAACCCGTTGAACTCAATGATCCGGGCGGCGATATTCAGCGGTAAACTAGCAATTGCCGTGCACTTATCGATCCGCAGTAACGGACATCGCGATCCATTACAACAGCGGTTGGCCTCTGTGTAACGCTCCGGCATACACTGCCCCTAGCTCGTGGTGGACGGTCCCTCTGTAAGGGTAGGGTAGCTGCTCTACACTGACCGGGGATCTCCGCGCAGTCCTTCCGGAAGGCGAATGGGTCCGACCGAGCTCTGGTGTGCTGCTGGAAGGGTGATGGATTCTAACGAGAGGGGTAGTACCG…	Single read from an extremity of a full-length cDNA clone made from Anopheles gambiae total adult females. 3-PRIME end of clone FK0AAA44BE12 of strain 6-9 of Anopheles gambiae (African malaria mosquito)
AF015646	548	species	63366	Anopheles culicifacies A	7164	Anopheles	7157	Culicidae	2759	Eukaryota	D	AAGCACTCTGAATAGAGAGTC	0	TGGTCCGTGTTTCAAGAC	0	402	aataccgccatgagaccgatagaagacaagtaccgtgagggaaagttgaaaagcactctgaatagagagtcAAATAGTACGTGAAACTGCCTAGGGGACACAAACCTGTTGAACTCAATGTTCCGGGCGGCGATATTCAGCGGTGGTCGACCCGAATGGGCCGGCTGCCGTGCACTTATCAGACCGCAGTAACGGACATCGCGATCCATTACGATGGTTACACTCCGGCAATGGCCCCTGGCTCGTGGTGGGCGGCTTTCTAGTAGGGGCGGCACGGCGGCTTCCCTGAGCGATAGTCTCCGCGACCTTCCTTTGTGAGGGGCGCAGGGCCCGACCGAGTCCGGTGTGCCGCTGGAATAGTGATGGATTGGTATGAGCGGGGTTCGAGCGTTGTGATCT…	Anopheles culicifacies A 28S ribosomal RNA gene, partial sequence
L78470	601	species	49918	Anopheles earlei	7164	Anopheles	7157	Culicidae	2759	Eukaryota	D	AAGCACTCTGAATAGAGAGTC	0	TGGTCCGTGTTTCAAGAC	0	455	aataccaccatgagaccgatagcgaacaagtaccgtgagggaaagttgaaaagcactctgaatagagagtcAAAGAGTACGTGAAACTGCCTAGGGGAACAAACCCGTTGAACTCAATAGACCGGGGCGGCGACATTCAGCCGCGCGTCGGTGCGCCTCCGGGCGTGCAGGCCGCGGTGCACTTGTCGACCTGCAGCGTACGGACATCGCGATCCATTACGAACGGGGCATTGGGGGTGCGCAAGCGCCTCCTAGCAATCCAACACTTGGTCCCAGACTCGTGCGGTCGACCCTCCAGTAGTGGCACTTAGCTCAGAAGGCCTGTGCCGCGAAAGGGGGATTCGGTTGGCCTCCGGGCCTTCCGGAGTTCGGCCGAGTCCGGTGTACCGTTGGATGCGT…	Anopheles earlei 28S ribosomal RNA (28S rRNA), D2 variable region
DQ523567	811	species	93950	Anopheles minimus A	7164	Anopheles	7157	Culicidae	2759	Eukaryota	D	AAGCACTCTGAATAGAGAGTC	0	TGGTCCGTGTTTCAAGAC	0	399	aataccgccatgagaccgatagaagacaagtaccgtgagggaaagttgaaaagcactctgaatagagagtcAAATAGTACGTGAAACTGCCTAGGGGACGCAAACCTGTTGAACTCAATGATCCGGGCGGCGATATTCAGCGGTGGTCCACCCTTACGGGTTGGCTGCCGTGCACTTATCGGTCCGCAGTAACGGACATCGCGATCCATTACAATGGGGCATTCCAGCAATGGCCCCTAGCTCGTGGTTGGCGGCTTTCTAGTAAGGTGGCTCGGCGGCCTCCCTGAGCGAAAGTCTCCGCGCCCTTCACACCAGAGGGGCGCAGGGCCCGATCGAGCTTGGTGTGCCGCTGGAAATGTGATGGATTGGTATGAGCGGGGTTCGAGTGTGTGGCCTTAA…	Anopheles minimus A 28S ribosomal RNA gene, partial sequence
DQ665847	853	species	93951	Anopheles minimus C	7164	Anopheles	7157	Culicidae	2759	Eukaryota	D	AAGCACTCTGAATAGAGAGTC	0	TGGTCCGTGTTTCAAGAC	0	399	aataccgccatgagaccgatagaagacaagtaccgtgagggaaagttgaaaagcactctgaatagagagtcAAATAGTACGTGAAACTGCCTAGGGGACGCAAACCTGTTGAACTCAATGATCCGGGCGGCGATATTCAGCGGTGGTCCACCCCTGCGGGTTGGCTGCCGTGCACTTATCGGTCCGCAGTAACGGACATCGCGATCCATTACAATGGGGCATTCCGGCAATGGCCCCTAGCTCGTGGTTGGCGGCTTTCTAGTAAGGTGGCTCGGCGGCCTCCCTGAGCGAGAGTCTCCGCGCCCTTCATACCAGAGGGGCGCAGGGCCCGACCGAGCATGGTGTGCCGCTGGAAGTGTGATGGATTGGTATGAGCGGGGTTCGAGTGTGTGGYCTTAA…	Anopheles minimus C 28S ribosomal RNA gene, partial sequence
BX029703	1021	species	7165	Anopheles gambiae	7164	Anopheles	7157	Culicidae	2759	Eukaryota	D	AAGCACTCTGAATAGAGAGTC	0	TGGTCCGTGTTTCAAGAC	0	403	aataccaccatgagtccgatagcgaacaagtaccgtgagggaaagttgaaaagcactctgaatagagagtcAAATAGTACGTGAAACATGCCTAGGGGTACAAACCCGTTGAACTCAATGATCCGGGCGGCGATATTCAGCGGTAAACTAGCAATTGCCGTGCACTTATCGATCCGCAGTAACGGACATCGCGATCCATTACAACAGCGGTTGGCCTCGTGCTAACGCTCCGGCATACACTGCCCCTAGCTCGTGGTGGACGGTCCCTCTGTAAGGGTAGGGTAGCTGCTCTACACTGACCGGGGATCTCCGCGCAGTCCTTCCGGAAGGCGAATGGGTCCGACCGAGCTCTGGTGTGCTGCTGGAAGGGTGATGGATTCTAACGAGAGGGGTAGTACC…	Single read from an extremity of a full-length cDNA clone made from Anopheles gambiae total adult females. 5-PRIME end of clone FK0AAA44BE12 of strain 6-9 of Anopheles gambiae (African malaria mosquito)
BX070114	798	species	7165	Anopheles gambiae	7164	Anopheles	7157	Culicidae	2759	Eukaryota	D	AAGCACTCTGAATAGAGAGTC	0	TGGTCCGTGTTTCAAGAC	0	348	aaataccaccatgagtccgatagcgaacaagtaccgtgaggaaagttgaaaagcactctgaatagagagtcAAATAGTACGTGAAACTGCCTAGGGGTACAAACCCGTTGAACTCAATGATCCGGGCGGCGATATTCAGCGGTAAACTAGCAATTGCCGTGCACTTATCGATCCGCAGTAACGGACATCGCGATCCATTACAACAGCGGTTGGCCTCGTGCTAACGCTCCGGCATACACTGCCCCTAGCTCGTGGTGGACGGTCCCTCTGTAAGGGATAGGGTAGCTGCTCTACACTGACCGGGGATCTCCGCGCAGTCCTTCTGGAAGGCGAATGGGTCCGACCGAGCTCTGTGTGTGCTGCTGGAAGGGTGATGGATTCTAACGAGAGGGGTAGTAC…	Single read from an extremity of a full-length cDNA clone made from Anopheles gambiae total adult females. 5-PRIME end of clone FK0AAC7AB12 of strain 6-9 of Anopheles gambiae (African malaria mosquito)
BX051591	698	species	7165	Anopheles gambiae	7164	Anopheles	7157	Culicidae	2759	Eukaryota	D	AAGCACTCTGAATAGAGAGTC	0	TGGTCCGTGTTCCAAGAC	1	403	aaataccaccatgagtccgatagcgaacaagtaccgtgaggaaagttgaaaagcactctgaatagagagtcAAATAGTACGTGAAACTGCCTAGGGGTACAAACCCGTTGAACTCAATGATCCGGGCGGCGATATTCAGCGGTAAACTAGCATTTGCCGTGCACTTATCGATCCGCAGTAACGGACATCGCGATCCATTACAACAGCGGTTGGCCTCGTGCTAACGCTCCGGCATACACTGCCCCTAGCTCGTGGTGGACGGTCCCTCTGTAAGGGTAGGGTAGCTGCTCTACACTAGACCGGGGATCTCCGCGCAGTCCTTCTGGAAGGCGAATGGGTCCGACCGAGCTCTGGTGTGCTGCTGGAAGGGTGATGGATTCTAACGAGAGGGGTAGCACC…	Single read from an extremity of a full-length cDNA clone made from Anopheles gambiae total adult females. 5-PRIME end of clone FK0AAC29AA02 of strain 6-9 of Anopheles gambiae (African malaria mosquito)
L78479	603	species	49923	Anopheles walkeri	7164	Anopheles	7157	Culicidae	2759	Eukaryota	D	AAGCACTCTGAATAGAGAGTC	0	TGGTCCGTGTTTCAAGAC	0	457	aataccgccatgagaccgatagcgaacaagtaccgtgagggaaagttgaaaagcactctgaatagagagtcAAAGAGTACGTGAAACTGCCTAGGGGAACAAACCCGTTGAACTCAATAGACCGGGGCGGCGATATTCAACCGTGCGTCGGCGCGCACCCGTGTGTGCTGGCCGCGGGGCACTTATCGATCCGCAGCGTACGGACATCGCGATCCATTACGAAAGTGCCGGGGTGCGCAAGCGCCCAGCGCATGGTCCAACAAGGGTCTCAGGCTTGTGCAGTCGACCCTCCAGTAGCAGCACTTAGCTCAGAAGGCCTGTGCTGCGAACGGGGGATTCGGTGCGTGTGGGCAACCGCAGGTATCGAAATTCGGCCTAGTCGAGTGTACCGTTGGAAGC…	Anopheles walkeri 28S ribosomal RNA (rRNA), D2 variable region
L78065	8312	species	7167	Anopheles albimanus	7164	Anopheles	7157	Culicidae	2759	Eukaryota	D	AAGCACTCTGAATAGAGAGTC	0	TGGTCCGTGTTTCAAGAC	0	406	aatatcaccatgagaccgatagcgaacaagtaccgtgagggaaagttgaaaagcactctgaatagagagtcAAAGAGTACGTGAAACTGCCTAGGGGTGCAAACCCGTTGAACTCAATTATCCGAGCGGCGATATTCACCTGTGCGGTCACCCGGCCGCCAGGGCACTTATCGCTCGCAGTGTGCGGACATCGCGATCCATTACGAATGCGCCCCTGGCCATTCCAGCACCCGGTCCCTGGCTCGTGTTGTCGACCTCCTCGCGGGTGCCTTAGCCGGCGCCTTGCGTACGGGGGACTGGTTCCTTCCCGGTTCCGACTCGACCGAGCGTGGTGTGCCGCTGGAAGCGTGATGGACTCACAGTCGCGGTGGGCAGACGGTAGCGTATGCTGCGGCATAT…	Anopheles albimanus ribosomal RNA (rRNA) gene
KR024032	540	species	139046	Anopheles neivai	7164	Anopheles	7157	Culicidae	2759	Eukaryota	D	AAGCACTCTGAATAGAGAGTC	0	TGGTCCGTGTTTCAAGAC	0	420	aatatcaccatgagaccgatagcgaacaagtaccgtgagggaaagttgaaaagcactctgaatagagagtcAAAGAGTACGTGAAACTGCCTAGGGGCGCAAACCCGTTGAACTCAATTATCCGAGCGGCGATATTCACCTGCGCGGTGCTCTCGCGGGCGCCGCCAGGGCACTTATCGTGCGCAGTGTGCGGACATCGCGATCCATTACGAACCCTTTGAACGCAATTCCAGCACCTCGGCCCCTGGCCCGTGTTGTCGACCCTCGGGCGGTCCGCGGCTGCGCCGCGTGGCCGCGTGGCGAGGGAACCGTGTGCTCGCGCACACTCTTCGACCGGGCGCGGTGTGCCGCTGGAAGCGTGATGGACTCACAGTCGCGGTGGGCAGACGGTAGCGTATG…	Anopheles neivai voucher AN-BAH-04 28S ribosomal RNA gene, partial sequence
LC025777	921	species	55967	Aedes togoi	7158	Aedes	7157	Culicidae	2759	Eukaryota	D	AAGCACTCTGAATAGAGAGTC	0	TGGTCCGTGTTTCAAGAC	0	373	aatatcaccacgagaccgatagcgaacaagtaccgtgagggaaagttgaaaagcactctgaatagagagtcAAACAGTACGTGAAACTGCCTAGGGCTCAAGCCCGTTGAACTCGATTATCCGAGCGGAGACATTCACCGGCGGTGGTTCCCACCGCCGCCGGGCACTTGTCTCCCGCGCCCCCACGAGGACATTGCGATCCATTACGAAACAGCTTTGGCGTCGCAAGACGCAAGGTCGCCCGACAGTTGCCCCCTGGTGCCGGTTGCTTGCCCCACCGTAGCGACGCTCAGTTCCGAAGGCCTGTGCCGCGAGCTGGGGCTTACTGCACGTGGTGTTTGCAGTCGGGCGCGTGATGGATTTCCCCGCACACCGTCGGCCTTCCCGCAACGGGCCGGC…	Aedes togoi gene for 28S ribosomal RNA, partial sequence, isolate: AE413
LC025776	904	species	55967	Aedes togoi	7158	Aedes	7157	Culicidae	2759	Eukaryota	D	AAGCACTCTGAATAGAGAGTC	0	TGGTCCGTGTTTCAAGAC	0	373	aatatcaccacgagaccgatagcgaacaagtaccgtgagggaaagttgaaaagcactctgaatagagagtcAAACAGTACGTGAAACTGCCTAGGGCTCAAGCCCGTTGAACTCGATTATCCGAGCGGAGACATTCACCGGCGGTGGTTCCCACCGCCGCCGGGCACTTGTCTCCCGCGCCCCCACGAGGACATTGCGATCCATTACGAAACAGCTTTGGCGTCGCAAGACGCAAGGTCGCCCGACAGTTGCCCCCTGGTGCCGGTTGCTTGCCCCACCGTAGCGACGCTCAGTTCTGAAGGCCTGTGCCGCGAGCTGGGGCTTACTGCACGTGGTGTTTGCAGTCGGGCGCGTGATGGATTTACCCGCACACCGTCGGCCTTCCCGCAACGGGCCGGC…	Aedes togoi gene for 28S ribosomal RNA, partial sequence, isolate: AE124
LC025775	902	species	55967	Aedes togoi	7158	Aedes	7157	Culicidae	2759	Eukaryota	D	AAGCACTCTGAATAGAGAGTC	0	TGGTCCGTGTTTCAAGAC	0	373	aatatcaccacgagaccgatagcgaacaagtaccgtgagggaaagttgaaaagcactctgaatagagagtcAAACAGTACGTGAAACTGCCTAGGGCTCAAGCCCGTTGAACTCGATTATCCGAGCGGAGACATTCACCGGCGGTGGTTCCCACCGCCGCCGGGCACTTGTCTCCCGCGCCCCCACGAGGACATTGCGATCCATTACGAAACAGCTTTGGCGTCGCAAGACGCAAGGTCGCCCGACAGTTGCCCCCTGGTGCCGGTTGCTTGCCCCACCGTAGCGACGCTCAGTTCCGAAGGCCTGTGCCGCGAGCTGGGGCTTACTGCACGTGGTGTTTGCAGTCGGGCGCGTGATGGATTTACCCGCACACCGTCGGCCTTCCCGCAACGGGCCGGC…	Aedes togoi gene for 28S ribosomal RNA, partial sequence, isolate: AE242
LC025773	904	species	55967	Aedes togoi	7158	Aedes	7157	Culicidae	2759	Eukaryota	D	AAGCACTCTGAATAGAGAGTC	0	TGGTCCGTGTTTCAAGAC	0	374	aatatcaccacgagaccgatagcgaacaagtaccgtgagggaaagttgaaaagcactctgaatagagagtcAAACAGTACGTGAAACTGCCTAGGGCTCAAGCCCGTTGAACTCGATTATCCGAGCGGAGACATTCACCGGCGGTGGTTCCAATCCGCCGCCGGGCACTTGTCTCCCGCGCCCCCACGAGGACATTGCGATCCATTACGAAACAGCTTTGGCGTCGCAAGACGCAAGGTCGCCCGACAGTTGCCCCCTGGTGCCGGTTGCTTGCCCCACCGTAGCGACGCTCAGTTCTGAAGGCCTGTGCCGCGAGCTGGGGCTTACTGCACGTGGTGTTTGCAGTCGGGCGCGTGATGGATTTACCCGCACACCGTCGGCCTTCCCGCAACGGGCCGG…	Aedes togoi gene for 28S ribosomal RNA, partial sequence, isolate: AE166
LC025772	903	species	55967	Aedes togoi	7158	Aedes	7157	Culicidae	2759	Eukaryota	D	AAGCACTCTGAATAGAGAGTC	0	TGGTCCGTGTTTCAAGAC	0	373	aatatcaccacgagaccgatagcgaacaagtaccgtgagggaaagttgaaaagcactctgaatagagagtcAAACAGTACGTGAAACTGCCTAGGGCTCAAGCCCGTTGAACTCGATTATCCGAGCGGAGACATTCACCGGCGGTGGTTCCCACCGCCGCCGGGCACTTGTCTCCCGCGCCCCCACGAGGACATTGCGATCCATTACGAAACAGCTTTGGCGTCGCAAGACGCAAGGTCGCCCGACAGTTGCCCCCTGGTGCCGGTTGCTTGCCCCACCGTAGCGACGCTCAGTTCCGAAGGCCTGTGCCGCGAGCTGGGGCTTACTGCACGTGGTGTTTGCAGTCGGGCGCGTGATGGATTTACCCGCACACCGTCGGCCTTCCCGCAACGGGCCGGC…	Aedes togoi gene for 28S ribosomal RNA, partial sequence, isolate: AE126
LC025771	921	species	55967	Aedes togoi	7158	Aedes	7157	Culicidae	2759	Eukaryota	D	AAGCACTCTGAATAGAGAGTC	0	TGGTCCGTGTTTCAAGAC	0	373	aatatcaccacgagaccgatagcgaacaagtaccgtgagggaaagttgaaaagcactctgaatagagagtcAAACAGTACGTGAAACTGCCTAGGGCTCAAGCCCGTTGAACTCGATTATCCGAGCGGAGACATTCACCGGCGGTGGTTCCCACCGCCGCCGGGCACTTGTCTCCCGCGCCCCCACGAGGACATTGCGATCCATTACGAAACAGCTTTGGCGTCGCAAGACGCAAGGTCGCCCGACAGTTGCCCCCTGGTGCCGGTTGCTTGCCCCACCGTAGCGACGCTCAGTTCYGAAGGCCTGTGCCGCGAGCTGGGGCTTACTGCACGTGGTGTTTGCAGTCGGGCGCGTGATGGATTTACCCGCACACCGTCGGCCTTCCCGYAACGGGCCGGC…	Aedes togoi gene for 28S ribosomal RNA, partial sequence, isolate: AE328
LC025769	902	species	55967	Aedes togoi	7158	Aedes	7157	Culicidae	2759	Eukaryota	D	AAGCACTCTGAATAGAGAGTC	0	TGGTCCGTGTTTCAAGAC	0	373	aatatcaccacgagaccgatagcgaacaagtaccgtgagggaaagttgaaaagcactctgaatagagagtcAAACAGTACGTGAAACTGCCTAGGGCTCAAGCCCGTTGAACTCGATTATCCGAGCGGAGACATTCACCGGCGGTGGTTCCCACCGCCGCCGGGCACTTGTCTCCCGCGCCCCCACGAGGACATTGCGATCCATTACGAAACAGCTTTGGCGTCGCAAGACGCAAGGTCGCCCGACAGTTGCCCCCTGGTGCCGGTTGCTTGCCCCACCGTAGCGACGCTCAGTTCCGAAGGCCTGTGCCGCGAGCTGGGGCTTACTGCACGTGGTGTTTGCAGTCGGGCGCGTGATGGATTTACCCGCACACCGTCGGCCTTCCCGTAACGGGCCGGC…	Aedes togoi gene for 28S ribosomal RNA, partial sequence, isolate: AE322
LC025768	921	species	55967	Aedes togoi	7158	Aedes	7157	Culicidae	2759	Eukaryota	D	AAGCACTCTGAATAGAGAGTC	0	TGGTCCGTGTTTCAAGAC	0	373	aatatcaccacgagaccgatagcgaacaagtaccgtgagggaaagttgaaaagcactctgaatagagagtcAAACAGTACGTGAAACTGCCTAGGGCTCAAGCCCGTTGAACTCGATTATCCGAGCGGAGACATTCACCGGCGGTGGTTCCCACCGCCGCCGGGCACTTGTCTCCCGCGCCCCCACGAGGACATTGCGATCCATTACGAAACAGCTTTGGCGTCGCAAGACGCAAGGTCGCCCGACAGTTGCCCCCTGGTGCCGGTTGCTTGCCCCACCGTAGCGACGCTCAGTTCCGAAGGCCTGTGCCGCGAGCTGGGGCTTACTGCACGTGGTGTTTGCAGTCGGGCGCGTGATGGATTTACCCGCACACCGTCGGCCTTCCCGTAACGGGCCGGC…	Aedes togoi gene for 28S ribosomal RNA, partial sequence, isolate: AE321
LC025766	921	species	55967	Aedes togoi	7158	Aedes	7157	Culicidae	2759	Eukaryota	D	AAGCACTCTGAATAGAGAGTC	0	TGGTCCGTGTTTCAAGAC	0	373	aatatcaccacgagaccgatagcgaacaagtaccgtgagggaaagttgaaaagcactctgaatagagagtcAAACAGTACGTGAAACTGCCTAGGGCTCAAGCCCGTTGAACTCGATTATCCGAGCGGAGACATTCACCGGCGGTGGTTCCCACCGCCGCCGGGCACTTGTCTCCCGCGCCCCCACGAGGACATTGCGATCCATTACGAAACAGCTTTGGCGTCGCAAGACGCAAGGTCGCCCGACAGTTGCCCCCTGGTGCCGGTTGCTTGCCCCACCGTAGCGACGCTCAGTTCYGAAGGCCTGTGCCGCGAGCTGGGGCTTACTGCACGTGGTGTTTGCAGTCGGGCGCGTGATGGATTTACCCGCACACCGTCGGCCTTCCCGTAACGGGCCGGC…	Aedes togoi gene for 28S ribosomal RNA, partial sequence, isolate: AE226
LC025765	908	species	55967	Aedes togoi	7158	Aedes	7157	Culicidae	2759	Eukaryota	D	AAGCACTCTGAATAGAGAGTC	0	TGGTCCGTGTTTCAAGAC	0	373	aatatcaccacgagaccgatagcgaacaagtaccgtgagggaaagttgaaaagcactctgaatagagagtcAAACAGTACGTGAAACTGCCTAGGGCTCAAGCCCGTTGAACTCGATTATCCGAGCGGAGACATTCACCGGCGGTGGTTCCCACCGCCGCCGGGCACTTGTCTCCCGCGCCCCCACGAGGACATTGCGATCCATTACGAAACAGCTTTGGCGTCGCAAGACGCAAGGTCGCCCGACAGTTGCCCCCTGGTGCCGGTTGCTTGCCCCACCGTAGCGACGCTCAGTTCTGAAGGCCTGTGCCGCGAGCTGGGGCTTACTGCACGTGGTGTTTGCAGTCGGGCGCGTGATGGATTTACCCGCACACCGTCGGCCTTCCCGTAACGGGCCGGC…	Aedes togoi gene for 28S ribosomal RNA, partial sequence, isolate: AE219
LC025764	903	species	55967	Aedes togoi	7158	Aedes	7157	Culicidae	2759	Eukaryota	D	AAGCACTCTGAATAGAGAGTC	0	TGGTCCGTGTTTCAAGAC	0	373	aatatcaccacgagaccgatagcgaacaagtaccgtgagggaaagttgaaaagcactctgaatagagagtcAAACAGTACGTGAAACTGCCTAGGGCTCAAGCCCGTTGAACTCGATTATCCGAGCGGAGACATTCACCGGCGGTGGTTCCCACCGCCGCCGGGCACTTGTCTCCCGCGCCCCCACGAGGACATTGCGATCCATTACGAAACAGCTTTGGCGTCGCAAGACGCAAGGTCGCCCGACAGTTGCCCCCTGGTGCCGGTTGCTTGCCCCACCGTAGCGACGCTCAGTTCTGAAGGCCTGTGCCGCGAGCTGGGGCTTACTGCACGTGGTGTTTGCAGTCGGGCGCGTGATGGATTTACCCGCACACCGTCGGCCTTCCCGCAACGGGCCGGC…	Aedes togoi gene for 28S ribosomal RNA, partial sequence, isolate: AE128
LC025752	903	species	55967	Aedes togoi	7158	Aedes	7157	Culicidae	2759	Eukaryota	D	AAGCACTCTGAATAGAGAGTC	0	TGGTCCGTGTTTCAAGAC	0	373	aatatcaccacgagaccgatagcgaacaagtaccgtgagggaaagttgaaaagcactctgaatagagagtcAAACAGTACGTGAAACTGCCTAGGGCTCAAGCCCGTTGAACTCGATTATCCGAGCGGAGACATTCACCGGCGGTGGTTCCCACCGCCGCCGGGCACTTGTCTCCCGCGCCCCCACGAGGACATTGCGATCCATTACGAAACAGCTTTGGCGTCGCAAGACGCAAGGTCGCCCGACAGTTGCCCCCTGGTGCCGGTTGCTTGCCCCACCGTAGCGACGCTCAGTTCTGAAGGCCTGTGCCGCGAGCTGGGGCTTACTGCACGTGGTGTTTGCAGTCGGGCGCGTGATGGATTTACCCGCACACCGTCGGCCTTCCCGTAACGGGCCGGC…	Aedes togoi gene for 28S ribosomal RNA, partial sequence, isolate: AE249
LC025751	902	species	55967	Aedes togoi	7158	Aedes	7157	Culicidae	2759	Eukaryota	D	AAGCACTCTGAATAGAGAGTC	0	TGGTCCGTGTTTCAAGAC	0	373	aatatcaccacgagaccgatagcgaacaagtaccgtgagggaaagttgaaaagcactctgaatagagagtcAAACAGTACGTGAAACTGCCTAGGGCTCAAGCCCGTTGAACTCGATTATCCGAGCGGAGACATTCACCGGCGGTGGTTCCCACCGCCGCCGGGCACTTGTCTCCCGCGCCCCCACGAGGACATTGCGATCCATTACGAAACAGCTTTGGCGTCGCAAGACGCAAGGTCGCCCGACAGTTGCCCCCTGGTGCCGGTTGCTTGCCCCACCGTAGCGACGCTCAGTTCTGAAGGCCTGTGCCGCGAGCTGGGGCTTACTGCACGTGGTGTTTGCAGTCGGGCGCGTGATGGATTTACCCGCACACCGTCGGCCTTCCCGCAACGGGCCGGC…	Aedes togoi gene for 28S ribosomal RNA, partial sequence, isolate: AE235
LC025740	921	species	55967	Aedes togoi	7158	Aedes	7157	Culicidae	2759	Eukaryota	D	AAGCACTCTGAATAGAGAGTC	0	TGGTCCGTGTTTCAAGAC	0	373	aatatcaccacgagaccgatagcgaacaagtaccgtgagggaaagttgaaaagcactctgaatagagagtcAAACAGTACGTGAAACTGCCTAGGGCTCAAGCCCGTTGAACTCGATTATCCGAGCGGAGACATTCACCGGCGGTGGTTCCCACCGCCGCCGGGCACTTGTCTCCCGCGCCCCCACGAGGACATTGCGATCCATTACGAAACAGCTTTGGCGTCGCAAGACGCAAGGTCGCCCGACAGTTGCCCCCTGGTGCCGGTTGCTTGCCCCACCGTAGCGACGCTCAGTTCCGAAGGCCTGTGCCGCGAGCTGGGGCTTACTGCACGTGGTGTTTGCAGTCGGGCGCGTGATGGATTTACCCGCACACCGTCGGCCTTCCCGCAACGGGCCGGC…	Aedes togoi gene for 28S ribosomal RNA, partial sequence, isolate: AE171
LC025737	921	species	55967	Aedes togoi	7158	Aedes	7157	Culicidae	2759	Eukaryota	D	AAGCACTCTGAATAGAGAGTC	0	TGGTCCGTGTTTCAAGAC	0	373	aatatcaccacgagaccgatagcgaacaagtaccgtgagggaaagttgaaaagcactctgaatagagagtcAAACAGTACGTGAAACTGCCTAGGGCTCAAGCCCGTTGAACTCGATTATCCGAGCGGAGACATTCACCGGCGGTGGTTCCCACCGCCGCCGGGCACTTGTCTCCCGCGCCCCCACGAGGACATTGCGATCCATTACGAAACAGCTTTGGCGTCGCAAGACGCAAGGTCGCCCGACAGTTGCCCCCTGGTGCCGGTTGCTTGCCCCACCGTAGCGACGCTCAGTTCTGAAGGCCTGTGCCGCGAGCTGGGGCTTACTGCACGTGGTGTTTGCAGTCGGGCGCGTGATGGATTTACCCGCACACCGTCGGCCTTCCCGYAACGGGCCGGC…	Aedes togoi gene for 28S ribosomal RNA, partial sequence, isolate: AE153
LC025735	922	species	55967	Aedes togoi	7158	Aedes	7157	Culicidae	2759	Eukaryota	D	AAGCACTCTGAATAGAGAGTC	0	TGGTCCGTGTTTCAAGAC	0	374	aatatcaccacgagaccgatagcgaacaagtaccgtgagggaaagttgaaaagcactctgaatagagagtcAAACAGTACGTGAAACTGCCTAGGGCTCAAGCCCGTTGAACTCGATTATCCGAGCGGAGACATTCACCGGCGGTGGTTCCAATCCGCCGCCGGGCACTTGTCTCCCGCGCCCCCACGAGGACATTGCGATCCATTACGAAACAGCTTTGGCGTCGCAAGACGCAAGGTCGCCCGACAGTTGCCCCCTGGTGCCGGTTGCTTGCCCCACCGTAGCGACGCTCAGTTCTGAAGGCCTGTGCCGCGAGCTGGGGCTTACTGCACGTGGTGTTTGCAGTCGGGCGCGTGATGGATTTACCCGCACACCGTCGGCCTTCCCGCAACGGGCCGG…	Aedes togoi gene for 28S ribosomal RNA, partial sequence, isolate: AE145
LC025732	909	species	55967	Aedes togoi	7158	Aedes	7157	Culicidae	2759	Eukaryota	D	AAGCACTCTGAATAGAGAGTC	0	TGGTCCGTGTTTCAAGAC	0	373	aatatcaccacgagaccgatagcgaacaagtaccgtgagggaaagttgaaaagcactctgaatagagagtcAAACAGTACGTGAAACTGCCTAGGGCTCAAGCCCGTTGAACTCGATTATCCGAGCGGAGACATTCACCGGCGGTGGTTCCCACCGCCGCCGGGCACTTGTCTCCCGCGCCCCCACGAGGACATTGCGATCCATTACGAAACAGCTTTGGCGTCGCAAGACGCAAGGTCGCCCGACAGTTGCCCCCTGGTGCCGGTTGCTTGCCCCACCGTAGCGACGCTCAGTTCTGAAGGCCTGTGCCGCGAGCTGGGGCTTACTGCACGTGGTGTTTGCAGTCGGGCGCGTGATGGATTTACCCGCACACCGTCGGCCTTCCCGTAACGGGCCGGC…	Aedes togoi gene for 28S ribosomal RNA, partial sequence, isolate: AE122
LC025731	921	species	55967	Aedes togoi	7158	Aedes	7157	Culicidae	2759	Eukaryota	D	AAGCACTCTGAATAGAGAGTC	0	TGGTCCGTGTTTCAAGAC	0	373	aatatcaccacgagaccgatagcgaacaagtaccgtgagggaaagttgaaaagcactctgaatagagagtcAAACAGTACGTGAAACTGCCTAGGGCTCAAGCCCGTTGAACTCGATTATCCGAGCGGAGACATTCACCGGCGGTGGTTCCCACCGCCGCCGGGCACTTGTCTCCCGCGCCCCCACGAGGACATTGCGATCCATTACGAAACAGCTTTGGCGTCGCAAGACGCAAGGTCGCCCGACAGTTGCCCCCTGGTGCCGGTTGCTTGCCCCACCGTAGCGACGCTCAGTTCTGAAGGCCTGTGCCGCGAGCTGGGGCTTACTGCACGTGGTGTTTGCAGTCGGGCGCGTGATGGATTTACCCGCACACCGTCGGCCTTCCCGTAACGGGCCGGC…	Aedes togoi gene for 28S ribosomal RNA, partial sequence, isolate: AE121
LC025729	921	species	55967	Aedes togoi	7158	Aedes	7157	Culicidae	2759	Eukaryota	D	AAGCACTCTGAATAGAGAGTC	0	TGGTCCGTGTTTCAAGAC	0	373	aatatcaccacgagaccgatagcgaacaagtaccgtgagggaaagttgaaaagcactctgaatagagagtcAAACAGTACGTGAAACTGCCTAGGGCTCAAGCCCGTTGAACTCGATTATCCGAGCGGAGACATTCACCGGCGGTGGTTCCCACCGCCGCCGGGCACTTGTCTCCCGCGCCCCCACGAGGACATTGCGATCCATTACGAAACAGCTTTGGCGTCGCAAGACGCAAGGTCGCCCGACAGTTGCCCCCTGGTGCCGGTTGCTTGCCCCACCGTAGCGACGCTCAGTTCTGAAGGCCTGTGCCGCGAGCTGGGGCTTACTGCACGTGGTGTTTGCAGTCGGGCGCGTGATGGATTTACCCGCACACCGTCGGCCTTCCCGCAACGGGCCGGC…	Aedes togoi gene for 28S ribosomal RNA, partial sequence, isolate: AE119
JX070792	581	species	41430	Anopheles messeae	7164	Anopheles	7157	Culicidae	2759	Eukaryota	D	AAGCACTCTGAATAGAGAGTC	0	TTGTCCGTGTTTCAAGAC	1	455	aataccaccatgagaccgatagcgaacaagtaccgtgagggaaagttgaaaagcactctgaatagagagtcAAAGAGTACGTGAAACTGTCTAGGGGAACAAACCCGTTGAACTCAATAGACCGGGGCGGCGACATTCAGCCGCGCGTCGGTGCGCCTCCGGGCGTGCTGGCCGCGGTGCACTTGTCGACCTGCAGCGTACGGACATCGCGATCCATTACGAACGGGGCATTGGGGATGCGCAAGCGTCTCCTAGCAATCCAACACTCGGTCCCAGACTCGTGCGGTCGACCCTCCAGTAGTGGCACTTAGCTCAGAAGGCCTGTGCCGCAAACGGGGGATTCGGAGGGCCTCCGGGCCTTCCGGAGTTCGGCCGAGTCCGGTGTACCGTTGGATGCGT…	Anopheles messeae isolate D2_183B 28S ribosomal RNA gene, partial sequence
JX070797	543	species	107326	Anopheles jeyporiensis	7164	Anopheles	7157	Culicidae	2759	Eukaryota	D	AAGTACTCTGAATAGAGAGTC	1	CTGTCCGTGTTTCAAGAC	2	410	aatattgccatgagaccgatagaaaacaagtaccgtgagggaaagttgaaaagtactctgaatagagagtcAAATAGTACGTGAAACTGCCTAGGGGTTACAAACCCGTAGAACTCAATGATCCGGGCGGCGATATTCAGCGGTGGTCGGTTCCGCAAGGGGCCGGCTGCCGTGCACTTATCGGTCCGCAATAACGGACATCGCGATCCATTACAATTTGAAACTTGAACGCTTCAGCAACGGCCCCTGGCTCGTGTTTGGCGGCTCTCTAGTAAGGCGGCTCGGCGGCCACCCTGAGCGAGAGTCTCCGCGCCTTTCAACCGAGAGGCGCAGGGCCCGACCGAGTCTTGGTGTGCTGCTGAAAACGTGATGGATTGGTATGAGCGGGGTGCCGAGTGT…	Anopheles jeyporiensis isolate D2_207A 28S ribosomal RNA gene, partial sequence
JX070786	517	species	112268	Anopheles minimus	7164	Anopheles	7157	Culicidae	2759	Eukaryota	D	AAGCACTCTGAATAGAGAGTC	0	TTGTCCGTGTTTCAAGAC	1	399	aataccgccatgagaccgatagaagacaagtaccgtgagggaaagttgaaaagcactctgaatagagagtcAAATAGTACGTGAAACTGCCTAGGGGACGCAAACCTGTTGAACTCAATGATCCGGGCGGCGATATTCAGCGGTGGTCCACCCTTACGGGTTGGCTGCCGTGCACTTATCGGTCCGCAGTAACGGACATCGCGATCCATTACAATGGGGCATTCCACCAATGGCCCCTAGCTCGTGGTTGGCGGCTTTCTAGTAAGGTGGCTCGGCGGCCTCCCTGAGCGAAAGTCTCCGCGCCCTTCACACCAAAGGGGCGCAGGGCCCGATCGAGCTTGGTGTGCCGCTGGAAATGTGATGGATTGGTATGAGCGGGGTTCGAGTGTGTGGCCTTAA…	Anopheles minimus isolate D2_102 28S ribosomal RNA gene, partial sequence
JX070790	514	species	93947	Anopheles aconitus	7164	Anopheles	7157	Culicidae	2759	Eukaryota	D	AAGCACTCTGAATAGAGAGTC	0	CGGTCCGTGTTTCAAGAC	1	401	aatatcgccatgagaccgatagaagacaagtaccgtgagggaaagttgaaaagcactctgaatagagagtcAAATAGTACGTGAAACTGCCTAGGGGACGCAAACCTGTTGAACTCAATGATCCGAGCGGCGATATTCAGTGGTGGTCGACTCCTGACCGGGTCGGCTGCCGTGCACTTATCGGTCCGCAGTAACGGACATCGCGATCCATTACAATGGTGTATTCGGGCAATGGCCCCTGACTCGTGGTAGGCGGCTCTTCAGTAAGGTGGCTCGGCGGCCATCCTGAGCAGGAGTCTCCGCGACCTTCTAACCGAGGGGCGCAGGGCCCGACCGAGTCTGGTGTGCCGCTGGAAGTGTGATGGATTGGTATGAGCGGGGTGTCGAGTGAGTGGTCTT…	Anopheles aconitus isolate D2_170 28S ribosomal RNA gene, partial sequence
MG242601	747	species	228918	Ochlerotatus trivittatus	190765	Ochlerotatus	7157	Culicidae	2759	Eukaryota	D	AAGCACTCTGAATAGAGAGTC	0	TGGTCCGTGTTTCAAGAC	0	370	aatatcaccacgagaccgatagcgaacaagtaccgtgagggaaagttgaaaagcactctgaatagagagtcAAAAAGTACGTGAAACTGCCTAGGGCTCAAACCCGTTGAACTCGATTATCCGGGCGGAGACATTCACCGGCGGTTGGCCAGCGATGGACGGCCGCCGGGCACTTGTCTCCCGCGTCAAGAGGACATTGCGATCCATTACGAAACAGCTCTGCGTCGCAAGACGCAAGGTCGCCCGACAGTTGCCCCTTGGTGCCGGTTGCTTGCCCCACAGTAGCGACGCTCAGTTCTGAAGGCCTGTGCCGCGAGGTGGGGCTTACTGCACGTGGTGTTTGCAGTCGGGCGCGTGATGGATTTACCCGTACGCCGTCGGCCCCCACGGGTCGGCGGA…	Ochlerotatus trivittatus 28S ribosomal RNA gene, partial sequence
MG242591	754	species	310513	Ochlerotatus sollicitans	190765	Ochlerotatus	7157	Culicidae	2759	Eukaryota	D	AAGCACTCTGAATAGAGAGTC	0	TGGTCCGTGTTTCAAGAC	0	371	aatattaccacgagaccgatagcgaacaagtaccgtgagggaaagttgaaaagcactctgaatagagagtcAAAAAGTACGTGAAACTGCCTAGGGCTCAAACCCGTTGAACTCGATTATCCGGGCGGAGACATTCACCTGCGGTTGGCGCGTCGGCGCACGCCGCAGGGCACTTGTCTACCGCGTCAAGAGGACATTGCGATCCATTACGAAACAGCTTTCGCGTCGCAAGACGCAAGGTCGCCCGACAGTTGCCCCTTGGTGCTGGTTGCTTGCCCCACAGTAGCGACGCTCAGTTCTGAAGGCCTGTGCCGCGAGGTGGGGCTTACTGCACGTGGTGTTTGCAGTCGGGCGCGTGATGGATTCCCGCGCACGCCGCCGGTCCACCCGGGCCGGCGG…	Ochlerotatus sollicitans 28S ribosomal RNA gene, partial sequence
MG242578	747	species	980429	Ochlerotatus infirmatus	190765	Ochlerotatus	7157	Culicidae	2759	Eukaryota	D	AAGCACTCTGAATAGAGAGTC	0	TGGTCCGTGTTTCAAGAC	0	370	aatatcaccacgagaccgatagcgaacaagtaccgtgagggaaagttgaaaagcactctgaatagagagtcAAAAAGTACGTGAAACTGCCTAGGGCTCAAACCCGTTGAACTCGATTATCCGGGCGGAGACATTCACCGGCGGTTGGCCAGCGATGGACGGCCGCCGGGCACTTGTCTCCCGCGTCAAGAGGACATTGCGATCCATTACGAAACAGCTCTGCGTCGCAAGACGCAAGGTCGCCCGACAGTTGCCCCTTGGTGCTGGTTGCTTGCCCCACAGTAGCGACGCTCAGTTCTGAAGGCCTGTGCCGCGAGGTGGGGCTTACTGCACGTGGTGTTTGCAGTCGGGCGCGTGATGGATTTACCCGTACGCCGTCGGCCCCCACGGGCCGGCGGA…	Ochlerotatus infirmatus 28S ribosomal RNA gene, partial sequence
MG242590	760	species	1205942	Ochlerotatus sierrensis	190765	Ochlerotatus	7157	Culicidae	2759	Eukaryota	D	AAGCACTCTGAATAGAGAGTC	0	TGGTCCGTGTTTCAAGAC	0	378	aatatcaccacgagaccgatagcgaacaagtaccgtgagggaaagttgaaaagcactctgaatagagagtcAAAAAGTACGTGAAACTGCCTAGGGCTCAAGCCCGTTGAACTCGATTATCCGAGCGGAGACATTCACCTGCGGCTGGCCGGCGACGGCACGCCGCAGGGCACTTGTCTCCCGCGTCCAAGAGGACATTGCGATCCATTACGAAACCGCTTTCGCGTCGCAAGACGCAAGGTCGCCCGACAGTTGCCCCCTGGTGCTGGTTGCTTGCCCCACAGTAGCGACGCTCAGTTCTGAAGGCCTGTGCCGCGAGCTGGGGCTTACTGCACGTGGTGTTTGCAGTCGGGCGCGTGATGGATTTCCGCGTACACCGCCGGCCTTCCCGCAACGGGC…	Ochlerotatus sierrensis 28S ribosomal RNA gene, partial sequence
L22060	5298	species	7160	Aedes albopictus	7158	Aedes	7157	Culicidae	2759	Eukaryota	D	AAGCACTCTGAATAGAGAGTC	0	TGGTCCGTGTTTCAAGAC	0	380	aaatatcaccacgagaccgatagcgaacaagtaccgtgaggaaagttgaaaagcactctgaatagagagtcAAAAAGTACGTGAAACTGCCTAGGGCTCAAGCCCGTTGAACTCGATTATCCGAGCGGAGACATTCACCTGCGGTTGGCCGGCGACGGCACGGCCGCAGGGCACTTGTCTCTCGCACTAGCCAAGAGGACACTGCGATCCATTACGAAACAGCTTTCGCGCAAGCGCAAGGTCGCCCGACAACTGCCCCCTGGTGCTGGTTGCTTGCCCCACAGTAGCGACGCTCAGTTCTGAAGGCCTGTGCCGCGAGGTGGGGCTTACTGCACGTGGTGTTCTAGCAGTCGGGCGCGTGATGGATTCCCCCGGACACCGGGTGGTCTTCCCGTAAGG…	Aedes albopictus 18S, 5.8S, and 28S ribosomal RNA genes
MG242605	756	species	1806185	Ochlerotatus vittiger	190765	Ochlerotatus	7157	Culicidae	2759	Eukaryota	D	AAGCACTCTGAATAGAGAGTC	0	TGGTCCGTGTTTCAAGAC	0	377	aatatcaccacgagaccgatagcgaacaagtaccgtgagggaaagttgaaaagcactctgaatagagagtcAAAAAGTACGTGAAACTGCCTAGGGCTCAAACCCGTTGAACTCGATTATCCGAGCGGAGACATTCACCTGCGGTTGGCCGGTCACGGCAGGCCGCAGGGCACTTGTCTCCCGCGCACAAGAGGACATTGCGATCCATTACGAAACAGCTTTGGCGTCGCAAGACGCAAGGTCGCCCGACAGTTGCCCCTTGGTGCTGGTTGCTTGCCCCACAGTAGCGACGCTCAGTTCTGAAGGCCTGTGCCGCGAGGTGGGGCTTACTGCACGTGGTGTTTGCAGTCGGGCGCGTGATGGATTTCCGCGTACACCGTCGGTCTTCCCGCAATGGGC…	Ochlerotatus vittiger 28S ribosomal RNA gene, partial sequence
MG242599	758	species	1205945	Ochlerotatus thibaulti	190765	Ochlerotatus	7157	Culicidae	2759	Eukaryota	D	AAGCACTCTGAATAGAGAGTC	0	TGGTCCGTGTTTCAAGAC	0	377	aatatcaccacgagaccgatagcgaacaagtaccgtgagggaaagttgaaaagcactctgaatagagagtcAAAAAGTACGTGAAACTGCCTAGGGCTCAAGCCCGTTGAACTCGATTATCCGAGCGGAGACATTCACCTGCGGTTGGCCGGCGACGGCAGACCGCAGGGCACTTGTCTGCCGCGTCCACGAGGACATTGCGATCCATTACGAAACAGCTCTAGCGTCGCGAGACGCAAGGTCGCCCGACGGTTGCCCCCTGGTGCCGGTTGCTTGCCCCACAGTAGCGACGCTCAGTTCTGAAGGCCTGTGCCGCGAGGTGGGGCTTACTGCACGTGGTGTTTGCAGTCGGGCGCGTGATGGATTTCCGCGCACACCGCCGGCCTTCCCGCAGCGGGC…	Ochlerotatus thibaulti 28S ribosomal RNA gene, partial sequence
MG242592	749	species	120878	Ochlerotatus sticticus	190765	Ochlerotatus	7157	Culicidae	2759	Eukaryota	D	AAGCACTCTGAATAGAGAGTC	0	TGGTCCGTGTTTCAAGAC	0	371	aatatcaccacgagaccgatagcgaacaagtaccgtgagggaaagttgaaaagcactctgaatagagagtcAAAAAGTACGTGAAACTGCCTAGGGCTCAAACCCGTTGAACTCGATTATCCGAGCGGAGACATTCACCTGCGGTTGGCCAGCGATGGCACGCCGCAGGGCACTTGTCTCCCGCGCACAAGAGGACATTGCGATCCATTACGAAACAGCTCTGCGTCGCAAGACGCAAGGTCGCCCGACAGTTGCCCCTTGGTGCTGGTTGCTTGCCCCACAGTAGCGACGCTCAGTTCTGAAGGCCTGTGCCGCGAGGTGGGGCTTACTGCACGTGGTGTTTGCAGTCGGGCGCGTGATGGATTTCCCCGTACACTGCTGGCCTTCCCGGGCCGGCGG…	Ochlerotatus sticticus 28S ribosomal RNA gene, partial sequence
MG242589	756	species	1806184	Ochlerotatus sagax	190765	Ochlerotatus	7157	Culicidae	2759	Eukaryota	D	AAGCACTCTGAATAGAGAGTC	0	TGGTCCGTGTTTCAAGAC	0	377	aatatcaccacgagaccgatagcgaacaagtaccgtgagggaaagttgaaaagcactctgaatagagagtcAAAAAGTACGTGAAACTGCCTAGGGCTCAAACCCGTTGAACTCGATTATCCGAGCGGAGACATTCACCTGCGGTTGGCCGGTCACGGCAGACCGCAGGGCACTTGTCTCCCGCGCACAAGAGGACATTGCGATCCATTACGAAACAGCTTTAGCGTCGCAAGACGCAAGGTCGCCCGACAGTTGCCCCTTGGTGCTGGTTGCTTGCCCCACAGTAGCGACGCTCAGTTCTGAAGGCCTGTGCCGCGAGGTGGGGCTTACTGCACGTGGTGTTTGCAGTCGGGCGCGTGATGGATTTCCGCGTACACCGCCGGTCTTCCCGCAATGGAC…	Ochlerotatus sagax 28S ribosomal RNA gene, partial sequence
MG242585	761	species	508665	Aedes notoscriptus	7158	Aedes	7157	Culicidae	2759	Eukaryota	D	AAGCACTCTGAATAGAGAGTC	0	TGGTCCGTGTTTCAAGAC	0	380	aatatcaccacgagaccgatagcgaacaagtaccgtgagggaaagttgaaaagcactctgaatagagagtcAAAAAGTACGTGAAACTGCCTAGGGCTCAAGCCCGTTGAACTCGATTATCCGAGCGGAGACATTCACCTGCGGTTGGCCGGCGACGGCCCGCCGCAGGGCACTTGTCGCCCGCGTTACACGAGGACATTGCGATCCATTACGAAACAGCTTTGGCGTCCGCAAGGACGCAAGGTCGCCCGACAGTTGCCCCTTGGTGCTGGTTGCTTGCCCCACAGTAGCGACGCTCAGTTCTGAAGGCCTGTGCCGCGAGGTGGGGCTTACTGCACGTGGTGTTTGCAGTCGGGCGCGTGATGGATTTCCGCGTACACCGTCGGTCTTCCCGCAATG…	Aedes notoscriptus 28S ribosomal RNA gene, partial sequence
MG242579	756	species	228921	Ochlerotatus intrudens	190765	Ochlerotatus	7157	Culicidae	2759	Eukaryota	D	AAGCACTCTGAATAGAGAGTC	0	TGGTCCGTGTTTCAAGAC	0	377	aatatcaccacgagaccgatagcgaacaagtaccgtgagggaaagttgaaaagcactctgaatagagagtcAAAAAGTACGTGAAACTGCCTAGGGCTCAAGCCCGTTGAACTCGATTATCCGAGCGGAGACATTCACCTGCGGTTGGTCGGCGACGGCAGACCGCAGGGCACTTGTCTTCCGCGTCCAAGAGGACATTGCGATCCATTACGAAACAGCTTTAGCGTCGCAAGACGCAAGGTCGCCCGACAGTTGCCCCTTGGTGCTGGTTGCTTGCCCCACAGTAGCGACGCTCAGTTCTGAAGGCCTGTGCCGCGAGGTGGGGCTTACTGCACGTGGTGTTTGCAGTCGGGCGCGTGATGGATTTCCGCGTACACCGCCGGTCCTCCCGTAATGGGC…	Ochlerotatus intrudens 28S ribosomal RNA gene, partial sequence
MG242564	756	species	1129559	Ochlerotatus diantaeus	190765	Ochlerotatus	7157	Culicidae	2759	Eukaryota	D	AAGCACTCTGAATAGAGAGTC	0	TGGTCCGTGTTTCAAGAC	0	377	aatatcaccacgagaccgatagcgaacaagtaccgtgagggaaagttgaaaagcactctgaatagagagtcAAAAAGTACGTGAAACTGCCTAGGGCTCAAGCCCGTTGAACTCGATTATCCGAGCGGAGACATTCACCTGCGGTTGGTCGGCGACGGCAGACCGCAGGGCACTTGTCTTCCGCGTCCAAGAGGACATTGCGATCCATTACGAAACAGCTTTAGCGTCGCAAGACGCAAGGTCGCCCGACAGTTGCCCCTTGGTGCTGGTTGCTTGCCCCACAGTAGCGACGCTCAGTTCTGAAGGCCTGTGCCGCGAGGTGGGGCTTACTGCACGTGGTGTTTGCAGTCGGGCGCGTGATGGATTTCCGCGTACACCGTCGGTCCTCCCGTAATGGGC…	Ochlerotatus diantaeus 28S ribosomal RNA gene, partial sequence
MG242555	757	species	120870	Ochlerotatus caspius	190765	Ochlerotatus	7157	Culicidae	2759	Eukaryota	D	AAGCACTCTGAATAGAGAGTC	0	TGGTCCGTGTTTCAAGAC	0	377	aatatcaccacgagaccgatagcgaacaagtaccgtgagggaaagttgaaaagcactctgaatagagagtcAAAAAGTACGTGAAACTGCCTAGGGCTCAAGCCCGTTGAACTCGATTATCCGAGCGGAGACATTCACCTGCGGTTGGCCGGCAACGGTCCGCCGCAGGGCACTTGTCTCCCGCGCACAAGAGGACATTGCGATCCATTACGAAACAGCTTTAGCGTCGCAAGACGCAAGGTCGCCCGACAGTTGCCCCTTGGTGCTGGTTGCTTGCCCCACAGTAGCGACGCTCAGTTCTGAAGGCCTGTGCCGCGAGGTGGGGCTTACTGCACGTGGTGTTTGCAGTCGGGCGCGTGATGGATTTCCGCGTACACCGTCGGTCTTCCCGCAATGGAC…	Ochlerotatus caspius 28S ribosomal RNA gene, partial sequence
MG242540	774	species	7159	Aedes aegypti	7158	Aedes	7157	Culicidae	2759	Eukaryota	D	AAGCACTCTGAATAGAGAGTC	0	TGGTCCGTGTTTCAAGAC	0	384	aatatcaccacgagaccgatagcgaacaagtaccgtgagggaaagttgaaaagcactctgaatagagagtcAAAAAGTACGTGAAACTGCCTAGGGCTCAAGCCCGTTGAACTCGATTATCCGATGCGGAGACATTCACCTGCGGTGTGCTGCGAACCAGTGCGCCGCAGGGCACTTGTCTACTCGCGCTAGCCAAGAGGACACTGCGATCCATTACGAAACAGCTTTCGCGTCGCGAGACGCAAGGTCGCCCGACAGTTGCCCCCTGGTGCTGGTAGCTTGCCCCACAGTAGCGACGCTCAGTTCTGAAGGCCTGTGCCGCGAGGTGGGGCTTACTGCACGTGGTGTTTGCAGTCGGGCGCGTGATGGATTCCCCCGGACACCGGGTGGTCTTCCCGC…	Aedes aegypti 28S ribosomal RNA gene, partial sequence
MG242546	747	species	1205936	Ochlerotatus atlanticus	190765	Ochlerotatus	7157	Culicidae	2759	Eukaryota	D	AAGCACTCTGAATAGAGAGTC	0	TGGTCCGTGTTTCAAGAC	0	370	aatatcaccacgagaccgatagcgaacaagtaccgtgagggaaagttgaaaagcactctgaatagagagtcAAAAAGTACGTGAAACTGCCTAGGGCTCAAACCCGTTGAACTCGATTATCCGGGCGGAGACATTCACCTGCGGTTGGCCAGCGATGGACGGCCGCAGGGCACTTGTCTCCCGCGTCAAGAGGACATTGCGATCCATTACGAAACAGCTCTGCGTCGCAAGACGCAAGGTCGCCCGACAGTTGCCCCTTGGTGCTGGTTGCTTGCCCCACAGTAGCGACGCTCAGTTCTGAAGGCCTGTGCCGCGAGGTGGGGCTTACTGCACGTGGTGTTTGCAGTCGGGCGCGTGATGGATTTCCCCGTACACCGCCGGTCCGCAAGGGCCGGTGGA…	Ochlerotatus atlanticus 28S ribosomal RNA gene, partial sequence
KF687490	502	species	663928	Ochlerotatus dorsalis	190765	Ochlerotatus	7157	Culicidae	2759	Eukaryota	D	AAGCACTCTGAATAGAGAGTC	0	CTGTCCGTGTTTCAAGAC	2	377	aatatcaccacgagaccgatagcgaacaagtaccgtgagggaaagttgaaaagcactctgaatagagagtcAAAAAGTACGTGAAACTGCCTAGGGCTCAAGCCCGTTGAACTCGATTATCCGAGCGGAGACATTCACCTGCGGTTGGCCGGCAACGGTCCGCCGCAGGGCACTTGTCTCCCGCGCACAAGAGGACATTGCGATCCATTACGAAACAGCTTTAGCGTCGCAAGACGCAAGGTCGCCCGACAGTTGCCCCTTGGTGCTGGTTGCTTGCCCCACAGTAGCGACGCTCAGTTCTGAAGGCCTGTGCCGCGAGGTGGGGCTTACTGCACGTGGTGTTTGCAGTCGGGCGCGTGATGGATTTCCGCGTACACCGTCGGTCTTCCCGCAATGGAC…	Ochlerotatus dorsalis 28S ribosomal RNA gene, partial sequence
KF687488	506	species	7159	Aedes aegypti	7158	Aedes	7157	Culicidae	2759	Eukaryota	D	AAGCACTCTGAATAGAGAGTC	0	TTGTCCGTGTTTCAAGAC	1	384	aatatcaccacgagaccgatagcgaacaagtaccgtgagggaaagttgaaaagcactctgaatagagagtcAAAAAGTACGTGAAACTGCCTAGGGCTCAAGCCCGTTGAACTCGATTATCCGATGCGGAGACATTCACCTGCGGTGTGCTGCGACCCAGTGCGCCGCAGGGCACTTGTCTACTCGCGCTAGCCAAGAGGACACTGCGATCCATTACGAAACAGCTTTCGCGTCGCGAGACGCAAGGTCGCCCGACAGTTGCCCCCTGGTGCTGGTAGCTTGCCCCACAGTAGCGACGCTCAGTTCTGAAGGCCTGTGCCGCGAGGTGGGGCTTACTGCACGTGGTGTTTGCAGTCGGGCGCGTGATGGATTCCCCCGGACACCGGGTGGTCTTCCCGC…	Aedes aegypti 28S ribosomal RNA gene, partial sequence
BX041387	826	species	7165	Anopheles gambiae	7164	Anopheles	7157	Culicidae	2759	Eukaryota	D	AAGCACTCTGAATAGAGAGTC	0	TGGTCCGTGTTACAAGAC	1	402	actggtacaaaaaagtcgatagcgaacaagtaccgtgagggaaagttgaaaagcactctgaatagagagtcAAATAGTACGTGAAACTGCCTAGGGGTACAAACCCGTTGAACTCAATGATCCGGGCGGCGATATTCAGCGGTAAACTAGCAATTGCCGTGCACTTATCGATCCGCAGTAACGGACATCGCGATCCATTACAACAGCGGTTGGCCTCGTGCTAACGCTCCGGCATACACTGCCCCTAGCTCGTGGTGGACGGTCCCTCTGTAAGGGTAGGGTAGCTGCTCTACACTGACCGGGGATCTCCGCGCAGTCCTTCTGGAAGGCGAATGGGTCCGACCGAGCTCTGGTGTGCTGCTGGAAGGGTGATGGATTCTAACGAGAGGGGTAGTACCG…	Single read from an extremity of a full-length cDNA clone made from Anopheles gambiae total adult females. 5-PRIME end of clone FK0AAC12DA02 of strain 6-9 of Anopheles gambiae (African malaria mosquito)
MG242542	754	species	1806178	Aedes alboannulatus	7158	Aedes	7157	Culicidae	2759	Eukaryota	D	AAGCACTCTGAATAGAGAGTC	0	TGGTCCGTGTTTCAAGAC	0	372	aatatcaccacgagaccgatagcgaacaagtaccgtgagggaaagttgaaaagcactctgaatagagagtcAAAAAGTACGTGAAACTGCCTAGGGCTCAAGCCCGTTGAACTCGATTATCCGAGCGGAGACATTCACCTGCGGCCGTTTACGCCGCAGGGCACTTGTCTCCCGCGCACAAGAGGACATTGCGATCCATTACGAAACAGCTTTAGCGGCCGCAAGGCCCGCAAGGTCGCCCGACAGTTGCCCCCTGGTGCTTGGTAGCTTGCCCCACAGTAGCGACGCTCAGTTCTGAAGGCCTGTGCCGCGAGGTGGGGCTTACTGCACGTGGTGTTTGCAGTCGGGCGCGTGATGGATTTCCGCGTACACCGCCGGCCTTCCCGCAATGGGCCGGTG…	Aedes alboannulatus 28S ribosomal RNA gene, partial sequence
MG242597	757	species	1205944	Ochlerotatus thelcter	190765	Ochlerotatus	7157	Culicidae	2759	Eukaryota	D	AAGCACTCTGAATAGAGAGTC	0	TGGTCCGTGTTTCAAGAC	0	377	aatatcaccacgagaccgatagcgaacaagtaccgtgagggaaagttgaaaagcactctgaatagagagtcAAAAAGTACGTGAAACTGCCTAGGGCTCAAGCCCGTTGAACTCGATTATCCGAGCGGAGACATTCACCTGCGGTTGGCCGGCAACGGTTCGCCGCAGGGCACTTGTCTCTCGCGCACAAGAGGACATTGCGATCCATTACGAAACAGCTTTAGCGTCGCAAGACGCAAGGTCGCCCGACAGTTGCCCCTTGGTGCCGGTTGCTTGCCCCACAGTAGCGACGCTCAGTTCTGAAGGCCTGTGCCGCGAGGTGGGGCTTACTGCACGTGGTGTTTGCAGTCGGGCGCGTGATGGATTTCCGCGTACGCCGCCGGTCTTCCCGCAATGGAC…	Ochlerotatus thelcter 28S ribosomal RNA gene, partial sequence
MG242553	757	species	228917	Ochlerotatus canadensis	190765	Ochlerotatus	7157	Culicidae	2759	Eukaryota	D	AAGCACTCTGAATAGAGAGTC	0	TGGTCCGTGTTTCAAGAC	0	378	aatatcaccacgagaccgatagcgaacaagtaccgtgagggaaagttgaaaagcactctgaatagagagtcAAAAAGTACGTGAAACTGCCTAGGGCTCAAGCCCGTTGAACTCGATTATCCGAGCGGAGACATTCACCTGCGGTTGGTCGGCGACGGCAGACCGCAGGGCACTTGTCTCCCGCGTCACAAGAGGACATTGCGATCCATTACGAAACAGCTTTGGCGTCGCAAGACGCAAGGTCGCCCGACAGTTGCCCCTTGGTGCTGGTTGCTTGCCCCACAGTAGCGACGCTCAGTTCTGAAGGCCTGTGCCGCGAGGTGGGGCTTACTGCACGTGGTGTTTGCAGTCGGGCGCGTGATGGATTTCCGCGTACACCGTCGGTCTTCCCGCAATGGA…	Ochlerotatus canadensis 28S ribosomal RNA gene, partial sequence
MG242548	756	species	329101	Ochlerotatus aurifer	190765	Ochlerotatus	7157	Culicidae	2759	Eukaryota	D	AAGCACTCTGAATAGAGAGTC	0	TGGTCCGTGTTTCAAGAC	0	377	aatatcaccacgagaccgatagcgaacaagtaccgtgagggaaagttgaaaagcactctgaatagagagtcAAAAAGTACGTGAAACTGCCTAGGGCTCAAGCCCGTTGAACTCGATTATCCGAGCGGAGACATTCACCTGCGGTTGGCCGGCGACGGCAGACCGCAGGGCACTTGTCTTCCGCGCGCAAGAGGACATTGCGATCCATTACGAAACAGCTTTAGCGTCGCGAGACGCAAGGTCGCCCGACAGTTGCCCCTTGGTGCCGGTTGCTTGCCCCACAGTAGCGACGCTCAGTTCTGAAGGCCTGTGCCGCGAGGTGGGGCTTACTGCACGTGGTGTTTGCAGTCGGGCGCGTGATGGATTTCCGCGTACACCGTCGGCCTTCCCGCAATGGGC…	Ochlerotatus aurifer 28S ribosomal RNA gene, partial sequence
BX070882	897	species	7165	Anopheles gambiae	7164	Anopheles	7157	Culicidae	2759	Eukaryota	D	AAGCACTCTGAATAGAGAGTC	0	TGGTCCGTGTTTCAAGAC	0	401	accgagtccgatagcgaacaagtaccgtgaggaaagttgaaaagcactctgaatagagagtcAAATAGTACGTGAAATGCCTAGGGGTACAAACCCGTTGAACTCAATGATCCGGGCGGCGATATTCAGCGGTAAACTAGCAATTGCCGTGCACTTATCGATCCGCAGTAACGGACATCGCGATCCATTACAACAGCGGTTGGCCTCGTGCTAACGCTCCGGCATACACTGCCCCTAGCTCGTGGTGGACGGTCCCTCTGTAAGGGTAGGGTAGCTGCTCTACACTGACCGGGGATCTCCGCGCAGTCCTTCTGGAAGGCGAATGGGTCCGACCGAGCTCTGGTGTGCTGCTGGAAGGGTGATGGATTCTAACGAGAGGGGTAGTACCGCTGTCTTCTC…	Single read from an extremity of a full-length cDNA clone made from Anopheles gambiae total adult females. 5-PRIME end of clone FK0AAC8AG12 of strain 6-9 of Anopheles gambiae (African malaria mosquito)
MG242600	762	species	7162	Ochlerotatus triseriatus	190765	Ochlerotatus	7157	Culicidae	2759	Eukaryota	D	AAGCACTCTGAATAGAGAGTC	0	TGGTCCGTGTTTCAAGAC	0	381	aatatcaccacgagaccgatagcgaacaagtaccgtgagggaaagttgaaaagcactctgaatagagagtcAAAAAGTACGTGAAACTGCCTAGGGCTCAAGCCCGTTGAACTCGATTATCCGAGCGGAGACATTCACCTGCGGTCGGGCCCCTCCGGGGGTCCGCCGCAGGGCACTTGTCTCCCGCGTTCCAGAAGGACATTGCGATCCATTACGAAACAGCTTTGGCGTCGCAAGACGCAAGGTCGCCCGACAGTTGCCCCTTGGTGCCGGTTGCTTGCCCCACAGTAGCGACGCTCAGTTCTGAAGGCCTGTGCCGCGAGGTGGGGCTTACTGCACGTGGTGTTTGCAGTCGGGCGCGTGATGGATTTCCGCGTACACCGCCGGCCTTCCCGCAAT…	Ochlerotatus triseriatus 28S ribosomal RNA gene, partial sequence
MG242598	746	species	1197337	Ochlerotatus theobaldi	190765	Ochlerotatus	7157	Culicidae	2759	Eukaryota	D	AAGCACTCTGAATAGAGAGTC	0	TGGTCCGTGTTTCAAGAC	0	364	aatatcaccacgagaccgatagcgaacaagtaccgtgagggaaagttgaaaagcactctgaatagagagtcAAAAAGTACGTGAAACTGCCTAGGGCTCAAGCCCGTTGAACTCGATTATCCGCACGGAGACATTCACCTGTGGCCGCGAGGCCGCAGGGCACTTGTCTCCCGTCAAGAGGACATTGCGATCCATTACGAAACAGCTTTGGCGTCGCAAGACGCAAGGTCGCCCGACAGTTGCCCCCTGGTGCTGGTTGCTTGCCCCACAGTAGCGACGCTCAGTTCTGAAGGCCTGTGCCGCGAGGTGGGGCTTACTGCACGTGGTGTTTGCAGTCGGGCGCGTGATGGATTTCCGCGTACGCCGTCGGCCTTCCCGCAATGGGCCGGCGGACCGTCG…	Ochlerotatus theobaldi 28S ribosomal RNA gene, partial sequence
KF687489	506	species	317808	Aedes vittatus	7158	Aedes	7157	Culicidae	2759	Eukaryota	D	AAGCACTCTGAATAGAGAGTC	0	TGGTCCGTGTTTCAAGAC	0	377	aatatcaccacgagaccgatagcgaacaagtaccgtgagggaaagttgaaaagcactctgaatagagagtcAAAAAGTACGTGAAACTGCCTAGGGCTCAAGCCCGTTGAACTCGATTATCCGAGCGGAGACATTCACCTGCGGCTGGCCGGCGACGGCACACCGCAGGGCACTTGTCTCCCGCAACACACAGGACACTGCGATCCATTACGAAACAGCTTTCGCGTCGCAAGACGCAAGGTCGCCCGACAGTTGCCCCCTGGTGCTGGTTGCTTGCCCTACAGTAGCGACGCTCAGTTCTGAAGGCCTGTGCCGCGAGGTGGGGCTTACTGCACGTGGTGTTTGCAGTCGGGCGCGTGATGGATTCCCGCGTACACCGGCGGTCTTCCCGCAGAGGGC…	Aedes vittatus 28S ribosomal RNA gene, partial sequence
BX052956	833	species	7165	Anopheles gambiae	7164	Anopheles	7157	Culicidae	2759	Eukaryota	D	AAGCACTCTGAATAGAGAGTC	0	TGGTCCGTGTTACAAGAC	1	401	ggtacaccccagtccgatagcgaacaagtaccgtgaggaaagttgaaaagcactctgaatagagagtcAAATAGTACGTGAAATGCCTAGGGGTACAAACCCGTTGAACTCAATGATCCGGGCGGCGATATTCAGCGGTAAACTAGCAATTGCCGTGCACTTATCGATCCGCAGTAACGGACATCGCGATCCATTACAACAGCGGTTGGCCTCGTGCTAACGCTCCGGCATACACTGCCCCTAGCTCGTGGTGGACGGTCCCTCTGTAAGGGTAGGGTAGCTGCTCTACACTGACCGGGGATCTCCGCGCAGTCCTTCTGGAAGGCGAATGGGTCCGACCGAGCTCTGGTGTGCTGCTGGAAGGGTGATGGATTCTAACGAGAGGGGTAGTACCGCTGT…	Single read from an extremity of a full-length cDNA clone made from Anopheles gambiae total adult females. 5-PRIME end of clone FK0AAC30BD08 of strain 6-9 of Anopheles gambiae (African malaria mosquito)
MG242603	751	species	569589	Ochlerotatus vigilax	190765	Ochlerotatus	7157	Culicidae	2759	Eukaryota	D	AAGCACTCTGAATAGAGAGTC	0	TGGTCCGTGTTTCAAGAC	0	369	aatatcaccacgagaccgatagcgaacaagtaccgtgagggaaagttgaaaagcactctgaatagagagtcAAAAAGTACGTGAAACTGCCTAGGGCTCAAGCCCGTTGAACTCGATTATCCGCACGGAGACATTCACCTGCGGTGGGTCCGCCCGCCGCAGGGCACTTGTCTCCCGTCAAGAGGACATTGCGATCCATTACGAAACAGCTTTCGCGTCGCAAGACGCAAGGTCGCCCGACAGTTGCCCCTTGGTGCTTGGTTGCTTGCCCCACAGTAGCGACGCTCAGTTCTGAAGGCCTGTGCCGCGAGGTGGGGCTTACTGCACGTGGTGTTTGCAGTCGGGCGCGTGATGGATTCCCCCGTACGCCGTCGGTCTTCCCGCACCGGACCGGCGGAC…	Ochlerotatus vigilax 28S ribosomal RNA gene, partial sequence
MG242588	758	species	46209	Ochlerotatus punctor	190765	Ochlerotatus	7157	Culicidae	2759	Eukaryota	D	AAGCACTCTGAATAGAGAGTC	0	TGGTCCGTGTTTCAAGAC	0	379	aatatcaccacgagaccgatagcgaacaagtaccgtgagggaaagttgaaaagcactctgaatagagagtcAAAAAGTACGTGAAACTGCCTAGGGCTCAAGCCCGTTGAACTCGATTATCCGAGCGGAGACATTCACCTGCGGTTGGTCGGTTCCGCCGGCAGGCCGCAGGGCACTTGTCTCCCGCGTCAAGAGGACATTGCGATCCATTACGAAACAGCTTTCGCGTCGCAAGACGCAAGGTCGCCCGACAGTTGCCCCTTGGTGCTGGTTGCTTGCCCCACAGTAGCGACGCTCAGTTCTGAAGGCCTGTGCCGCGAGGTGGGGCTTACTGCACGTGGTGTTTGCAGTCGGGCGCGTGATGGATTTCCGCGTACACCGTCGGTCTTCCCGCAATGG…	Ochlerotatus punctor 28S ribosomal RNA gene, partial sequence
HM046592	526	species	767022	Ochlerotatus melanimon	190765	Ochlerotatus	7157	Culicidae	2759	Eukaryota	D	AGCACTTCTGAATAGAGAGTC	5	TGTCGGGTGTTTCAAGAC	4	376	tctccacggagacccgattagcgaacaagtaccgtgagggaaagttgaaaagcacttctgaatagagagtcAAAAAAGTACGTGAAACTGCCTAGGGTCAAGCCCGTTGAACTCGATTATCCGAGCGGAGACATTCACCTGCGGTTGGCCGGCAACGGTCCGCCGCAGGGCACTTGTCTCCCGCGCACAAGAGGACATTGCGATCCATTACGAAACAGCTTTGGCGTCGCAAGACGCAAGGTCGCCCGACAGTTGCCCCCTGGTGCTGGTTGCTTGCCCCACAGTAGCGACGCTCAGTTCTGAAGGCCTGTGCCGCGAGGTGGGGCTTACTGCACGTGGTGTTTGCAGTCGGGCGCGTGATGGATTTCCGCGCACGCCGCCGGTCTTCCCGCAATGGAC…	Ochlerotatus melanimon 28S ribosomal RNA gene, partial sequence
MG242608	760	species	1677689	Haemagogus janthinomys	7180	Haemagogus	7157	Culicidae	2759	Eukaryota	D	AAGCACTCTGAATAGAGAGTC	0	TGGTCCGTGTTTCAAGAC	0	378	aatatcaccacgagaccgatagcgaacaagtaccgtgagggaaagttgaaaagcactctgaatagagagtcAAAAAGTACGTGAAACTGCCTAGGGCTCAAACCCGTTGAACTCGATTATCCGAGCGGAGACATTCACCTGCGGTTGCGGTCAGCGATGGCCGTCGCCGCAGGGCACTTGTCTCTCGCGTTCCAAGAGGACATTGCGATCCATTACGAAACAGCTTGGCGTCGCAAGACGCAAGGTCGCCCGACAGTTGCCCCTTGGTGCTGGTAGCTTGCCCCACAGTAGCGACGCTCAGTTCTGAAGGCCTGTGCCGCGAGGTGGGGCTTACTGCACGTGGTGTTTGCAGTCGGGCGCGTGATGGATTTCCGCGTACACCGCCGGGTCCCCAGTGGC…	Haemagogus janthinomys 28S ribosomal RNA gene, partial sequence
MG242587	757	species	743693	Ochlerotatus provocans	190765	Ochlerotatus	7157	Culicidae	2759	Eukaryota	D	AAGCACTCTGAATAGAGAGTC	0	TGGTCCGTGTTTCAAGAC	0	378	aatatcaccacgagaccgatagcgaacaagtaccgtgagggaaagttgaaaagcactctgaatagagagtcAAAAAGTACGTGAAACTGCCTAGGGCTCAAGCCCGTTGAACTCGATTATCCGAGCGGAGACATTCACCTGCGGTTGGCCGGCAACGGCAGACCGCAGGGCACTTGTCTCCTGCGTTCCAAGAGGACATTGCGATCCATTACGAAACAGCTTTGGCGTCGCAAGACGCAAGGTCGCCCGACAGTTGCCCCCTGGTGCTGGTTGCTTGTCCCACAGTAGCGACGCTCAGTTCTGAAGGCCTGTGCCGCGAGGTGGGGCTTACTGCACGTGGTGTTTGCAGTCGGGCGCGTGATGGATTTCCGCGTACACCGTCGGTCTTCCCGCAAGGGG…	Ochlerotatus provocans 28S ribosomal RNA gene, partial sequence
MG242576	758	species	1799674	Aedes hirsutus	7158	Aedes	7157	Culicidae	2759	Eukaryota	D	AAGCACTCTGAATAGAGAGTC	0	TGGTCCGTGTTTCAAGAC	0	377	aatatcaccacgagaccgatagcgaacaagtaccgtgagggaaagttgaaaagcactctgaatagagagtcAAAAAGTACGTGAAACTGCCTAGGGCTCAAGCCCGTTGAACTCGATTATCCGAGCGGAGACATTCACCTGCGGTTGGTCGGCGACGGCAGACCGCAGGGCACTTGTCTCCCGCGTTCACGAGGACACTGCGATCCATTACGAAACAGCTTTCGCGTCGCAAGACGCAAGGTCGCCCGACAGTTGCCCCTTGGTGCTGGTTGCTTGTCCCACAGTAGCGACGCTCAGTTCTGAAGGCCTGTGCCGCGAGGTGGGGCTTACTGCACGTGGTGTTTGCAGTCGGGCGCGTGATGGATTCCCGCGTACGCCGGCGGTCTTCCCGTAAGGGGC…	Aedes hirsutus 28S ribosomal RNA gene, partial sequence
MG242575	766	species	104516	Ochlerotatus hendersoni	190765	Ochlerotatus	7157	Culicidae	2759	Eukaryota	D	AAGCACTCTGAATAGAGAGTC	0	TGGTCCGTGTTTCAAGAC	0	385	aatatcaccacgagaccgatagcgaacaagtaccgtgagggaaagttgaaaagcactctgaatagagagtcAAAAAGTACGTGAAACTGCCTAGGGCTCAAACCCGTTGAACTCGATTATCCGAGCGGAGACATTCACCTGCGGTCGGTTCCCCGGCCTCGGCCGGCCGCCGCAGGGCACTTGTCCCCCGCGTTCCAGAAGGACATTGCGATCCATTACGAAACAGCTTTGGCGTCGCAAGACGCAAGGTCGCCCGACAGTTGCCCCTTGGTGCCGGTTGCTTGCCCCACAGTAGCGACGCTCAGTTCTGAAGGCCTGTGCCGCGAGGTGGGGCTTACTGCACGTGGTGTTTGCAGTCGGGCGCGTGATGGATTTCCGCGTACACCGCCGGCCTTCCCG…	Ochlerotatus hendersoni 28S ribosomal RNA gene, partial sequence
MG242567	773	species	173086	Ochlerotatus epactius	190765	Ochlerotatus	7157	Culicidae	2759	Eukaryota	D	AAGCACTCTGAATAGAGAGTC	0	TGGTCCGTGTTTCAAGAC	0	388	aatatcaccacgagaccgatagcgaacaagtaccgtgagggaaagttgaaaagcactctgaatagagagtcAAAAAGTACGTGAAACTGCCTAGGGCTCAAACCCGTTGAACTCGATTATCCGGGCGGGGACATTCACCTGCGGCTTCGCCGCCGCAGGGCACTTGTCCCCGTCGTGCTCCCCGTGGGCCGCCAGAAGGACATTGCGATCCATTACGAAACAGCTTTGGCGTCGCGAGACGCAAGGTCGCCCGACACGTTGCCCCTTGGTGCCGGTTGCTTGCCCCACAGTAGCGACGCTCAGTTCCGAAGGCCTGTGCCGCGAGCTGGGGCTTACTGCACGCGGTGTGTTGCAGTCGGGCGCGTGATGGATTCCCCCGTACACCCCGGGCGGTGGCCA…	Ochlerotatus epactius 28S ribosomal RNA gene, partial sequence
MG242547	773	species	28624	Aedes atropalpus	7158	Aedes	7157	Culicidae	2759	Eukaryota	D	AAGCACTCTGAATAGAGAGTC	0	TGGTCCGTGTTTCAAGAC	0	388	aatatcaccacgagaccgatagcgaacaagtaccgtgagggaaagttgaaaagcactctgaatagagagtcAAAAAGTACGTGAAACTGCCTAGGGCTCAAACCCGTTGAACTCGATTATCCGGGCGGGGACATTCACCTGCGGCTTCGCCGCCGCAGGGCACTTGTCCCCGTCGTGCTCCCCGTGGGCCACCAGAAGGACATTGCGATCCATTACGAAACAGCTTTGGCGTCGCGAGACGCAAGGTCGCCCGACACGTTGCCCCTTGGTGCCGGTTGCTTGCCCCACAGTAGCGACGCTCAGTTCCGAAGGCCTGTGCCGCGAGCTGGGGCTTACTGCACGCGGTGTGTTGCAGTCGGGCGCGTGATGGATTCCCCCGTACACCCCGGGCGGTGGCCA…	Aedes atropalpus 28S ribosomal RNA gene, partial sequence
XM_001865926	1110	species	7176	Culex quinquefasciatus	7174	Culex	7157	Culicidae	2759	Eukaryota	D	AAGCACTCTGAATAGAGAGTC	0	TGGTCCGTGTTTCAAGAC	0	389	aatatcaccacgagaccgatagcgaacaagtaccgtgagggaaagttgaaaagcactctgaatagagagtcAAAAAGTACGTGAAACTGCCTAGGGCTCAAGCCCGTTGAACTCGATTATCCGCGGCGGAGATATTCACCTGCGGTTGGCCCTCACCGGTCCGCCGCAGGGCACTTACCTCCTGCCTCACGAGGACGTTGCGATCCATTACGGAACGGTTAGCCAGCAATGGCTACAGGCCCGGCACCTGCCCCTTGGCATTTGGTTGCTTGTCCCACAGTAGCGGCGCTCAGTTCGGAAGGCCTGCGCTGCAACCTGAGGCTTACCGGTGCGTGGTGTGCAGCCGGGCGCGTGATGGATTCCCGCGTCCACCGTCTCGGGAGAGGCTTGCCTCTCCCA…	Culex quinquefasciatus conserved hypothetical protein, mRNA
MG242604	759	species	317808	Aedes vittatus	7158	Aedes	7157	Culicidae	2759	Eukaryota	D	AAGCACTCTGAATAGAGAGTC	0	TGGTCCGTGTTTCAAGAC	0	376	aatatcaccacgagaccgatagcgaacaagtaccgtgagggaaagttgaaaagcactctgaatagagagtcAAAAAGTACGTGAAACTGCCTAGGGCTCAAGCCCGTTGAACTCGATTATCCGAGCGGAGACATTCACCTGCGGCTGGCCGGCGACGGCACACCGCAGGGCACTTGTCTCCCGCGTACACAGGACACTGCGATCCATTACGAAACAGCTTTCGCGTCGCAAGACGCAAGGTCGCCCGACAGTTGCCCCCTGGTGCTGGTTGCTTGCCCTACAGTAGCGACGCTCAGTTCTGAAGGCCTGTGCCGCGAGGTGGGGCTTACTGCACGTGGTGTTTGCAGTCGGGCGCGTGATGGATTCCCGCGTACACCGGCGGTCTTCCCGCAGAGGGCC…	Aedes vittatus 28S ribosomal RNA gene, partial sequence
MG242573	777	species	120874	Aedes geniculatus	7158	Aedes	7157	Culicidae	2759	Eukaryota	D	AAGCACTCTGAATAGAGAGTC	0	TGGTCCGTGTTTCAAGAC	0	387	aatatcaccacgagaccgatagcgaacaagtaccgtgagggaaagttgaaaagcactctgaatagagagtcAAAAAGTACGTGAAACTGCCTAGGGCTCAAGCCCGTTGAACTCGATTATCCGAGCGGAGACATTCACCTGCGGTTGGTCGGCCCCAACCGGCCGGCAGACCGCAGGGCACTTGTCTACCGCGCCCACGAGGACATTGCGATCCATTACGAAACCGCTCCTGGCGTCGCAAGACGCAAGGTCGCCCGACAGTTGCCCCTTGGTGCTTGGTTGCTTGCCCCACAGTAGCGACGCTCAGTTCTGAAGGCCTGTGCCGCGAGGTGGGGCTTACTGCACGTGGTGTTTGCAGTCGGGCGCGTGATGGATTTCCGCGCACGCCGTCGGCCTTCC…	Aedes geniculatus 28S ribosomal RNA gene, partial sequence
JX070788	567	species	261161	Anopheles lindesayi	7164	Anopheles	7157	Culicidae	2759	Eukaryota	D	AAGCACTCTGAATAGAGAGTC	0	TGGTCCGTGTTTCAAGAC	0	442	aatatgaccatgagaccgatagcgaacaagtaccgtgagggaaagttgaaaagcactctgaatagagagtcAAATAGTACGTGAAACTGCCTAGGGGTACAAACCCGTTGAACTCAATTGACCGGGGCGACGATATTCACCTGCGCGTCCGGCCGCTTGCGGCCCGGGCCACAGGGCACTTATCGTTCGCAGCGTACGGACATCGCGATCCATTACGAACGTGCCGTAGGTGCGCAAGCGCCTAAGCATATCCAACACCAGGTCCCTGGTTCGTGTTGTCGGCCCTCCAGTAGTGGCGCTTAGCTTCGCAAGAACGCCCGCACCACAACCGAGGGTTCCGGGGCTCCGGCCCCGGGCTCGACCGAGCTTCGGTGTACCGTTGGAAGCGTGATGGACTCA…	Anopheles lindesayi isolate D2_126 28S ribosomal RNA gene, partial sequence
MG242581	787	species	299629	Aedes luteocephalus	7158	Aedes	7157	Culicidae	2759	Eukaryota	D	AAGCACTCTGAATAGAGAGTC	0	TGGTCCGTGTTTCAAGAC	0	391	aatatcaccacgagaccgatagcgaacaagtaccgtgagggaaagttgaaaagcactctgaatagagagtcAAACAGTACGTGAAACTGCCTAGGGCTCAAGCCCGTTGAACTCGATTATCCGATGCGGAGACATTCACCTGCGGCCACCCCGTCGAGGGGCCACCGCAGGGCACTTGTCTACTCGCGCTTAGCCAAGAGGACACTGCGATCCATTACGAAACAGCGTTCGCGTCCGCAAGGACGCATCGGTCGCCCGACAGTTGCCCCCTGGTGCTGGTTGCTGGCCCCACAGTAGCGACGCTCAGTTCTGAAGGCCTGTGCCGCGAGGTGGGGCCCTACTGCACGTGGTGTTCTTGCAGTCGGGCGCGTGATGGATTCCCCCGGCCACCGGGTGGTC…	Aedes luteocephalus 28S ribosomal RNA gene, partial sequence
MG242574	759	species	228920	Ochlerotatus grossbecki	190765	Ochlerotatus	7157	Culicidae	2759	Eukaryota	D	AAGCACTCTGAATAGAGAGTC	0	TGGTCCGTGTTTCAAGAC	0	380	aatatcaccacgagaccgatagcgaacaagtaccgtgagggaaagttgaaaagcactctgaatagagagtcAAAAAGTACGTGAAACTGCCTAGGGCTCAAGCCCGTTGAACTCGATTATCCGAGCGGAGACATTCACCTGCGGTTGGTCGGCTTCGGCCGGCAGGCCGCAGGGCACTTGTCTCCCGCGTCAAGAGGACATTGCGATCCATTACGAAACAGCTTTCGCGTCGCAAGACGCAAGGTCGCCCGACAGTTGCCCCTTGGTGCTGGTTGCTTGCCCCACAGTAGCGACGCTCAGTTCTGAAGGCCTGTGCCGCGAGGTGGGGCTTACTGCACGTGGTGTTTGCAGTCGGGCGCGTGATGGATTTCCGCGTACACCGTCGGTCTTCCCGCAATG…	Ochlerotatus grossbecki 28S ribosomal RNA gene, partial sequence
MG242569	759	species	743691	Ochlerotatus fitchii	190765	Ochlerotatus	7157	Culicidae	2759	Eukaryota	D	AAGCACTCTGAATAGAGAGTC	0	TGGTCCGTGTTTCAAGAC	0	380	aatatcaccacgagaccgatagcgaacaagtaccgtgagggaaagttgaaaagcactctgaatagagagtcAAAAAGTACGTGAAACTGCCTAGGGCTCAAGCCCGTTGAACTCGATTATCCGAGCGGAGACATTCACCTGCGGTTGGTCGGCTTCGGTCGGCAGGCCGCAGGGCACTTGTCTCCCGCGTCAAGAGGACATTGCGATCCATTACGAAACAGCTTTCGCGTCGCAAGACGCAAGGTCGCCCGACAGTTGCCCCTTGGTGCTGGTTGCTTGCCCCACAGTAGCGACGCTCAGTTCTGAAGGCCTGTGCCGCGAGGTGGGGCTTACTGCACGTGGTGTTTGCAGTCGGGCGCGTGATGGATTTCCGCGTACACCGTCGGTCTTCCCGCAATG…	Ochlerotatus fitchii 28S ribosomal RNA gene, partial sequence
MG242568	759	species	329103	Ochlerotatus excrucians	190765	Ochlerotatus	7157	Culicidae	2759	Eukaryota	D	AAGCACTCTGAATAGAGAGTC	0	TGGTCCGTGTTTCAAGAC	0	380	aatatcaccacgagaccgatagcgaacaagtaccgtgagggaaagttgaaaagcactctgaatagagagtcAAAAAGTACGTGAAACTGCCTAGGGCTCAAGCCCGTTGAACTCGATTATCCGAGCGGAGACATTCACCTGCGGTTGGTCGGCTTCGGCCGGCAGGCCGCAGGGCACTTGTCTCCCGCGTCAAGAGGACATTGCGATCCATTACGAAACAGCTTTCGCGTCGCAAGACGCAAGGTCGCCCGACAGTTGCCCCTTGGTGCTGGTTGCTTGCCCCACAGTAGCGACGCTCAGTTCTGAAGGCCTGTGCCGCGAGGTGGGGCTTACTGCACGTGGTGTTTGCAGTCGGGCGCGTGATGGATTTCCGCGTACACCGCCGGTCTTCCCGCAATG…	Ochlerotatus excrucians 28S ribosomal RNA gene, partial sequence
MG242557	758	species	1315706	Ochlerotatus churchillensis	190765	Ochlerotatus	7157	Culicidae	2759	Eukaryota	D	AAGCACTCTGAATAGAGAGTC	0	TGGTCCGTGTTTCAAGAC	0	379	aatatcaccacgagaccgatagcgaacaagtaccgtgagggaaagttgaaaagcactctgaatagagagtcAAAAAGTACGTGAAACTGCCTAGGGCTCAAGCCCGTTGAACTCGATTATCCGAGCGGAGACATTCACCTGTGGTTGGCCGGTTCCGCCGGCAGGCCGCAGGGCACTTGTCTCCCGCGTCACGAGGACATTGCGATCCATTACGAAACAGCTTTCGCGTCGCAAGACGCAAGGTCGCCCGACAGTTGCCCCTTGGTGCTGGTTGCTTGCCCCACAGTAGCGACGCTCAGTTCTGAAGGCCTGTGCCGCGAGGTGGGGCTTACTGCACGTGGTGTTTGCAGTCGGGCGCGTGATGGATTTCCGCGTACACCGCCGGTCTTCCCGCAATGG…	Ochlerotatus churchillensis 28S ribosomal RNA gene, partial sequence
MG242539	759	species	329100	Ochlerotatus abserratus	190765	Ochlerotatus	7157	Culicidae	2759	Eukaryota	D	AAGCACTCTGAATAGAGAGTC	0	TGGTCCGTGTTTCAAGAC	0	380	aatatcaccacgagaccgatagcgaacaagtaccgtgagggaaagttgaaaagcactctgaatagagagtcAAAAAGTACGTGAAACTGCCTAGGGCTCAAGCCCGTTGAACTCGATTATCCGAGCGGAGACATTCACCTGCGGTTGGCCGGTTCCGGCCGGCAGGCCGCAGGGCACTTGTCTCCCGCGTCAAGAGGACATTGCGATCCATTACGAAACAGCTTTCGCGTCGCAAGACGCAAGGTCGCCCGACAGTTGCCCCTTGGTGCTGGTTGCTTGCCCCACAGTAGCGACGCTCAGTTCTGAAGGCCTGTGCCGCGAGGTGGGGCTTACTGCACGTGGTGTTTGCAGTCGGGCGCGTGATGGATTTCCGCGTACACCGTCGGTCTTCCCGCAATG…	Ochlerotatus abserratus 28S ribosomal RNA gene, partial sequence
MG242602	758	species	7163	Aedes vexans	7158	Aedes	7157	Culicidae	2759	Eukaryota	D	AAGCACTCTGAATAGAGAGTC	0	TGGTCCGTGTTTCAAGAC	0	377	aatatcaccacgagaccgatagcgaacaagtaccgtgagggaaagttgaaaagcactctgaatagagagtcAAAAAGTACGTGAAACTGCCTAGGGCTCAAGCCCGTTGAACTCGATTATCCGAGCGGAGACATTCACCTGCGGTTGGTCGGCGACGGCAGACCGCAGGGCACTTGTCTCTCGCGTTCACGAGGACACTGCGATCCATTACGAAACAGCTTTCGCGTCGCAAGACGCAAGGTCGCCCGACAGTTGCCCCTTGGTGCTGGTTGCTTGTCCCACAGTAGCGACGCTCAGTTCTGAAGGCCTGTGCCGCGAGGTGGGGCTTACTGCACGTGGTGTTTGCAGTCGGGCGCGTGATGGATTCCCGCGTACGCCGGCGGTCTTCCCGTAAGGGGC…	Aedes vexans 28S ribosomal RNA gene, partial sequence
MG242593	759	species	228919	Ochlerotatus stimulans	190765	Ochlerotatus	7157	Culicidae	2759	Eukaryota	D	AAGCACTCTGAATAGAGAGTC	0	TGGTCCGTGTTTCAAGAC	0	380	aatatcaccacgagaccgatagcgaacaagtaccgtgagggaaagttgaaaagcactctgaatagagagtcAAAAAGTACGTGAAACTGCCTAGGGCTCAAGCCCGTTGAACTCGATTATCCGAGCGGAGACATTCACCTGCGGTTGGTGGGTTCCGGCCCGCAGGCCGCAGGGCACTTGTCTCCCGCGTCAAGAGGACATTGCGATCCATTACGAAACAGCTTTCGCGTCGCAAGACGCAAGGTCGCCCGACAGTTGCCCCTTGGTGCTGGTTGCTTGCCCCACAGTAGCGACGCTCAGTTCTGAAGGCCTGTGCCGCGAGGTGGGGCTTACTGCACGTGGTGTTTGCAGTCGGGCGCGTGATGGATTTCCGCGTACACCGCCGGTCTTCCCGCAATG…	Ochlerotatus stimulans 28S ribosomal RNA gene, partial sequence
MG242583	782	species	686388	Aedes metallicus	7158	Aedes	7157	Culicidae	2759	Eukaryota	D	AAGCACTCTGAATAGAGAGTC	0	TGGTCCGTGTTTCAAGAC	0	392	aatatcaccacgagaccgatagcgaacaagtaccgtgagggaaagttgaaaagcactctgaatagagagtcAAAAAGTACGTGAAACTGCCTAGGGCTCAAGCCCGTTGAACTCGATTATCCGATGCGGAGACATTCACCTGCGGTCGGGCTCCCCTCCGCGGGGGTTCAGCCGCAGGGCACTTGTCTACTCGCGCTTAGCCAAGAGGACACTGCGATCCATTACGAAACAGCTTTCGCGTCGCAAGACGCAAGGTCGCCCGACAGTTGCCCCCTGGTGCTGGTAGCTTGCCCCACAGTAGCGACGCTCAGTTCTGAAGGCCTGTGCCGCGAGGTGGGGCTTACTGCACGTGGTGTTTGCAGTCGGGCGCGTGATGGATTCCCCCGGCCACCGGGTGGT…	Aedes metallicus 28S ribosomal RNA gene, partial sequence
MG242580	765	species	140438	Aedes japonicus	7158	Aedes	7157	Culicidae	2759	Eukaryota	D	AAGCACTCTGAATAGAGAGTC	0	TGGTCCGTGTTTCAAGAC	0	381	aatatcaccacgagaccgatagcgaacaagtaccgtgagggaaagttgaaaagcactctgaatagagagtcAAAAAGTACGTGAAACTGCCTAGGGCTCAAGCCCGTTGAACTCGATTATCCGAGCGGAGACATTCACCTGCGGCCGGGGGCTTTGCCGCCCAYGCTGCAGGGCACTTGTCTCCCGCGCTACACGAGGACATTGCGATCCATTACGAAACAGCTTCTGCGTCGCAAGACGCAAGGTCGCCCGACAGTTGCCCCTTGGTGCCGGTTGCTTGCCCCACCGTAGCGACGCTCAGTTCYGAAGGCCTGTGCCGCGAGCTGGGGCTTACTGCACGTGGTGTTTGCAGTCGGGCGCGTGATGGATTCCAGCGTACACCGTCGGCCTTCCCGCAAT…	Aedes japonicus 28S ribosomal RNA gene, partial sequence
MG242572	761	species	299627	Aedes furcifer	7158	Aedes	7157	Culicidae	2759	Eukaryota	D	AAGCACTCTGAATAGAGAGTC	0	TGGTCCGTGTTTCAAGAC	0	379	aatatcaccacgagaccgatagcgaacaagtaccgtgagggaaagttgaaaagcactctgaatagagagtcAAAAAGTACGTGAAACTGCCTAGGGCTCAAGCCCGTTGAACTCGATTATCCGAGCGGAGACATTCACCTGCGGTTGGTCGGCGACGGCAGACCGCAGGGCACTTGTCTTTCGCGTTTACAAGAGGACACTGCGATCCATTACGAAACAGCTTTCGCGTCGCRAGACGCAAGGTCGCCCGACAGTTGCCCCTTGGTGCTGGTTGCTTGCCCCACAGTAGCGACGCTCAGTTCTGAAGGCCTGTGCCGCGAGCTGGGGCTTACTGCACGTGGTGTTTGCAGTCGGGCGCGTGATGGATTTCCGCGTACACCGGTGGCCTTCCCGTATAGG…	Aedes furcifer 28S ribosomal RNA gene, partial sequence
MG242561	758	species	503354	Aedes cumminsii	7158	Aedes	7157	Culicidae	2759	Eukaryota	D	AAGCACTCTGAATAGAGAGTC	0	TGGTCCGTGTTTCAAGAC	0	377	aatatcaccacgagaccgatagcgaacaagtaccgtgagggaaagttgaaaagcactctgaatagagagtcAAAAAGTACGTGAAACTGCCTAGGGCTCAAGCCCGTTGAACTCGATTATCCGAGCGGAGACATTCACCTGCGGTTGGCCGGCGACGGCAGACCGCAGGGCACTTGTCTCTCGCGTTCACGAGGACACTGCGATCCATTACGAAACAGCTTTCGCGTCGCAAGACGCAAGGTCGCCCGACAGTTGCCCCCTGGTGCTGGTTGCTTGTCCCACAGTAGCGACGCTCAGTTCTGAAGGCCTGTGCCGCGAGGTGGGGCTTACTGCACGTGGTGTTTGCAGTCGGGCGCGTGATGGATTCCCGCGTACGCCGGCGGTCTTCCCGCAAGGGGC…	Aedes cumminsii 28S ribosomal RNA gene, partial sequence
MG242558	755	species	120872	Aedes cinereus	7158	Aedes	7157	Culicidae	2759	Eukaryota	D	AAGCACTCTGAATAGAGAGTC	0	TGGTCCGTGTTTCAAGAC	0	376	aatatcaccacgagaccgatagcgaacaagtaccgtgagggaaagttgaaaagcactctgaatagagagtcAAAAAGTACGTGAAACTGCCTAGGGCTCAAGCCCGTTGAACTCGATTATCCGAGCGGAGACATTCACCTGCGGTTGGTCGGCGACGGCAGACCGCAGGGCACTTGTCTCTCGCGTCAAGAGGACACTGCGATCCATTACGAAACAGCTTTCGCGTCGCAAGACGCAAGGTCGCCCGACAGTTGCCCCTTGGTGCTGGTTGGTTGTCCCACAGTAGCGACGCTCAGTTCTGAAGGCCTGTGCCGCGAGGTGGGGCTTACTGCACGCGGTGTTTGCAGTCGGGCGCGTGATGGATTTATGCGTACACCGGTGGTCTTCCCGTAAGGGGCC…	Aedes cinereus 28S ribosomal RNA gene, partial sequence
MG242552	767	species	644619	Ochlerotatus camptorhynchus	190765	Ochlerotatus	7157	Culicidae	2759	Eukaryota	D	AAGCACTCTGAATAGAGAGTC	0	TGGTCCGTGTTTCAAGAC	0	388	aatatcaccacgagaccgatagcgaacaagtaccgtgagggaaagttgaaaagcactctgaatagagagtcAAAAAGTACGTGAAACTGCCTAGGGCTCAAGCCCGTTGAACTCGATTATCCGAGCGGAGACATTCACCTGCGGTTCGGCCGGTTCCGGCCGGCTCGCCGCAGGGCACTTGTCTCCCGCGTCACACGAGGACATTGCGATCCATTACGAAACAGCTTTGGCGTCCGCAAGGACGCAAGGTCGCCCGACAGTTGCCCCCTGGTGCTGGTTGCTTGCCCCACAGTAGCGACGCTCAGTTCTGAAGGCCTGTGCCGCGAGGTGGGGCTTACTGCACGTGGTGTTTTGCAGTCGGGCGCGTGATGGATTTCCGCGTACACCGCCTCGGTCTTC…	Ochlerotatus camptorhynchus 28S ribosomal RNA gene, partial sequence
MG242549	793	species	856742	Ochlerotatus bancroftianus	190765	Ochlerotatus	7157	Culicidae	2759	Eukaryota	D	AAGCACTCTGAATAGAGAGTC	0	TGGTCCGTGTTTCAAGAC	0	392	aatatcaccacgagaccgatagcgaacaagtaccgtgagggaaagttgaaaagcactctgaatagagagtcAAAAAGTACGTGAAACTGCCTAGGGCTCAAGCCCGTTGAACTCGATTATCCGAGCGGAGACATTCACCTGCGGCCGGCTGGGGACTTGCTCCTCGGTACGCCGCAGGGCACTTGTCGCCCGCGCACGAGAGGACATTGCGATCCATTACGAAACAGCTTGCGCGTCCGCAAGGACGCAAGGTCGCCCGACAGTTGCCCCTTGGTGCTGGTAGCTTGCCCCACAGTAGCGACGCTCAGTTCTGAAGGCCTGTGCCGCGAGGTGGGGCTTACTGCACGTGGTGTTCTGCAGTCGGGCGCGTGATGGATTACATGCGCACACCGGGTCGGC…	Ochlerotatus bancroftianus 28S ribosomal RNA gene, partial sequence
MG242543	774	species	7160	Aedes albopictus	7158	Aedes	7157	Culicidae	2759	Eukaryota	D	AAGCACTCTGAATAGAGAGTC	0	TGGTCCGTGTTTCAAGAC	0	384	aatatcaccacgagaccgatagcgaacaagtaccgtgagggaaagttgaaaagcactctgaatagagagtcAAAAAGTACGTGAAACTGCCTAGGGCTCAAGCCCGTTGAACTCGATTATCCGAGCGGAGACATTCACCTGCGGTTGGCCGGCGACGGCACGGCCGCAGGGCACTTGTCTCTCGCACTAGCCAAGAGGACACTGCGATCCATTACGAAACAGCTTTCGCGCCGCAAGGCGCAAGGTCGCCCGACAACTGCCCCCTGGTGCTGGTTGCTTGCCCCACAGTAGCGACGCTCAGTTCTGAAGGCCTGTGCCGCGAGGTGGGGCTTACTGCACGTGGTGTTCTAGCAGTCGGGCGCGTGATGGATTCCCCCGGACACCGGGTGGTCTTCCCGT…	Aedes albopictus 28S ribosomal RNA gene, partial sequence
KF687492	498	species	7163	Aedes vexans	7158	Aedes	7157	Culicidae	2759	Eukaryota	D	AAGCACTCTGAATAGAGAGTC	0	TTTTCCGTGTTTCAAGAC	2	377	aatatcaccacgagaccgatagcgaacaagtaccgtgagggaaagttgaaaagcactctgaatagagagtcAAAAAGTACGTGAAACTGCCTAGGGCTCAAGCCCGTTGAACTCGATTATCCGAGCGGAGACATTCACCTGCGGTTGGTCGGCGACGGCAGACCGCAGGGCACTTGTCTCCCGCGTTCACGAGGACACTGCGATCCATTACGAAACAGCTTTGGCGTCGCAAGACGCAAGGTCGCCCGACAGTTGCCCCTTGGTGCTGGTTGCTTGTCCCACAGTAGCGACGCTCAGTTCTGAAGGCCTGTGCCGCGAGGTGGGGCTTACTGCACGTGGTGTTTGCAGTCGGGCGCGTGATGGATTCCCGCGTACGCCGGCGGTCTTCCCGTAAGGGGC…	Aedes vexans 28S ribosomal RNA gene, partial sequence
GU384725	1624	species	261159	Anopheles sineroides	7164	Anopheles	7157	Culicidae	2759	Eukaryota	D	AAGCACTCTGAATAGAGAGTC	0	TGGTCCGTGTTTCAAGAC	0	457	aatacgaccatgagaccgatagtaaacaagtaccgtgtgggaaagttgaaaagcactctgaatagagagtcAAAGAGTACGTGAAACTGCCGAGGGTGTAAAGCCTGTTGAACTCAATTATCCGTAGATGCCCGCAACCTGGATTTTGGCTGTCATGCGACTGTAGGCTCACGCTCTCGGTCGTAGGCCATATCCTAGCGGGGATCGAGCGCGGACATCGTGATCCATTACGCAAACCCAATGCGAGCGGCGACTCCGGTTGCTGCGAGCATATCCAACACCAGGTCCCAGAACACGCGGTCGACCCTCTAGTAGTGGCGCTCAGCTTAAGGCCGGCGTCGCGAACGGGGGATCGAGGCTCCGGTCTCGAGTTCGGCTAGTTCAGGTGTGCCGTTGGAT…	Anopheles sineroides isolate SINEK03 5.8S ribosomal RNA gene, partial sequence; internal transcribed spacer 2, complete sequence; and 28S ribosomal RNA gene, partial sequence
GU384724	1624	species	261159	Anopheles sineroides	7164	Anopheles	7157	Culicidae	2759	Eukaryota	D	AAGCACTCTGAATAGAGAGTC	0	TGGTCCGTGTTTCAAGAC	0	457	aatacgaccatgagaccgatagtaaacaagtaccgtgtgggaaagttgaaaagcactctgaatagagagtcAAAGAGTACGTGAAACTGCCGAGGGTGTAAAGCCTGTTGAACTCAATTATCCGTAGATGCCCGCAACCTGGATTTTGGCTGTCATGCGACTGTAGGCTCACGCTCTCGGTCGTAGGCCATATCCTAGCGGGGATCGAGCGCGGACATCGTGATCCATTACGCAAACCCAATGCGAGCGGCGACTCCGGTTGCTGCGAGCATATCCAACACCAGGTCCCAGAACACGCGGTCGACCCTCTAGTAGTGGCGCTCAGCTTAAGGCCGGCGTCGCGAACGGGGGATCGAGGCTCCGGTCTCGAGTTCGGCTAGTTCAGGTGTGCCGTTGGAT…	Anopheles sineroides isolate SINEK02 5.8S ribosomal RNA gene, partial sequence; internal transcribed spacer 2, complete sequence; and 28S ribosomal RNA gene, partial sequence
GU384723	1624	species	261159	Anopheles sineroides	7164	Anopheles	7157	Culicidae	2759	Eukaryota	D	AAGCACTCTGAATAGAGAGTC	0	TGGTCCGTGTTTCAAGAC	0	457	aatacgaccatgagaccgatagtaaacaagtaccgtgtgggaaagttgaaaagcactctgaatagagagtcAAAGAGTACGTGAAACTGCCGAGGGTGTAAAGCCTGTTGAACTCAATTATCCGTAGATGCCCGCAACCTGGATTTTGGCTGTCATGCGACTGTAGGCTCACGCTCTCGGTCGTAGGCCATATCCTAGCGGGGATCGAGCGCGGACATCGTGATCCATTACGCAAACCCAATGCGAGCGGCGACTCCGGTTGCTGCGAGCATATCCAACACCAGGTCCCAGAACACGCGGTCGACCCTCTAGTAGTGGCGCTCAGCTTAAGGCCGGCGTCGCGAACGGGGGATCGAGGCTCCGGTCTCGAGTTCGGCTAGTTCAGGTGTGCCGTTGGAT…	Anopheles sineroides isolate SINEK01 5.8S ribosomal RNA gene, partial sequence; internal transcribed spacer 2, complete sequence; and 28S ribosomal RNA gene, partial sequence
GU384722	1637	species	109668	Anopheles lesteri	7164	Anopheles	7157	Culicidae	2759	Eukaryota	D	AAGCACTCTGAATAGAGAGTC	0	TGGTCCGTGTTTCAAGAC	0	459	aatacaaccatgagaccgatagtaaacaagtaccgtgtgggaaagttgaaaagcactctgaatagagagtcAAAAAGTACGTGAAACTGCCGAGGGTGTAAAGCCTGTTGAACTCAATTATCCGTAGAATTTCTGGCAGCCCGGGAAATGGCTGTCACAGATACCGGCCAGTTGTCGGGATCTAGCCATTTCCCTTGCGAGATTCGAGTGCGGACATCGTGATCCATTACGCAAACCCAATGCGAGCGGCGACTCCGGTCGTGCGGCGAGCATATCCAACACCAGGTCCCAGAACAGTGCGGTCGACCCTCTAGTAGTGGCGCTCAGCTTAAGGCCGGCGTCGCAAACGGGGGATCGAGGCTCCGGTCTCGAGTTCGGCCAGTTCCGGTGTGCCGTTGG…	Anopheles lesteri isolate LES06 5.8S ribosomal RNA gene, partial sequence; internal transcribed spacer 2, complete sequence; and 28S ribosomal RNA gene, partial sequence
GU384720	1637	species	109668	Anopheles lesteri	7164	Anopheles	7157	Culicidae	2759	Eukaryota	D	AAGCACTCTGAATAGAGAGTC	0	TGGTCCGTGTTTCAAGAC	0	459	aatacaaccatgagaccgatagtaaacaagtaccgtgtgggaaagttgaaaagcactctgaatagagagtcAAAAAGTACGTGAAACTGCCGAGGGTGTAAAGCTCGTTGAACTCAATTATCCGTAGAATTTCTGGCAGCCCGGGAAATGGCTGTCACAGATACCGGCCAGTTGTCGGGATCTAGCCATTTCCCTTGCGAGATTCGAGTGCGGACATCGTGATCCATTACGCAAACCCAATGCGAGCGGCGACTCCGGTCGTGCGGCGAGCATATCCAACACCAGGTCCCAGAACAGTGCGGTCGACCCTCTAGTAGTGGCGCTCAGCTTAAGGCCGGCGTCGCAAACGGGGGATCGAGGCTCCGGTCTCGAGTTCGGCCAGTTCCGGTGTGCCGTTGG…	Anopheles lesteri isolate LES04 5.8S ribosomal RNA gene, partial sequence; internal transcribed spacer 2, complete sequence; and 28S ribosomal RNA gene, partial sequence
GU384719	1637	species	109668	Anopheles lesteri	7164	Anopheles	7157	Culicidae	2759	Eukaryota	D	AAGCACTCTGAATAGAGAGTC	0	TGGTCCGTGTTTCAAGAC	0	459	aatacaaccatgagaccgatagtaaacaagtaccgtgtgggaaagttgaaaagcactctgaatagagagtcAAAAAGTACGTGAAACTGCCGAGGGTGTAAAGCTCGTTGAACTCAATTATCCGTAGAATTTCTGGCAGCCCGGGAAATGGCTGTCACAGATACCGGCCAGTTGTCGGGATCTAGCCATTTCCCTTGCGAGATTCGAGTGCGGACATCGTGATCCATTACGCAAACCCAATGCGAGCGGCGACTCCGGTCGTGCGGCGAGCATATCCAACACCAGGTCCCAGAACAGTGCGGTCGACCCTCTAGTAGTGGCGCTCAGCTTAAGGCCGGCGTCGCAAACGGGGGATCGAGGCTCCGGTCTCGAGTTCGGCCAGTTCCGGTGTGCCGTTGG…	Anopheles lesteri isolate LES03 5.8S ribosomal RNA gene, partial sequence; internal transcribed spacer 2, complete sequence; and 28S ribosomal RNA gene, partial sequence
GU384718	1637	species	109668	Anopheles lesteri	7164	Anopheles	7157	Culicidae	2759	Eukaryota	D	AAGCACTCTGAATAGAGAGTC	0	TGGTCCGTGTTTCAAGAC	0	459	aatacaaccatgagaccgatagtaaacaagtaccgtgtgggaaagttgaaaagcactctgaatagagagtcAAAAAGTACGTGAAACTGCCGAGGGTGTAAAGCCTGTTGAACTCAATTATCCGTAGAATTTCTGGCAGCCCGGGAAATGGCTGTCACAGATACCGGCCAGTTGTCGGGATCTAGCAATTTCCCTTGCGAGATTCGAGTGCGGACATCGTGATCCATTACGCAAACCCAATGCGAGCGGCGACTCCGGTCGTGCGGCGAGCATATCCAACACCAGGTCCCAGAACAGTGCGGTCGACCCTCTAGTAGTGGCGCTCAGCTTAAGGCCGGCGTCGCAAACGGGGGATCGAGGCTCCGGTCTCGAGTTCGGCCAGTTCCGGTGTGCCGTTGG…	Anopheles lesteri isolate LES01 5.8S ribosomal RNA gene, partial sequence; internal transcribed spacer 2, complete sequence; and 28S ribosomal RNA gene, partial sequence
GU384717	1637	species	109668	Anopheles lesteri	7164	Anopheles	7157	Culicidae	2759	Eukaryota	D	AAGCACTCTGAATAGAGAGTC	0	TGGTCCGTGTTTCAAGAC	0	459	aatacaaccatgagaccgatagtaaacaagtaccgtgtgggaaagttgaaaagcactctgaatagagagtcAAAAAGTACGTGAAACTGCCGAGGGTGTAAAGCTCGTTGAACTCAATTATCCGTAGAATTTCTGGCAGCCCGGGAAATGGCTGTCACAGATACCGGCCAGTTGTCGGGATCTAGCCATTTCCCTTGCGAGATTCGAGTGCGGACATCGTGATCCATTACGCAAACCCAATGCGAGCGGCGACTCCGGTCGTGCGGCGAGCATATCCAACACCAGGTCCCAGAACAGTGCGGTCGACCCTCTAGTAGTGGCGCTCAGCTTAAGGCCGGCGTCGCAAACGGGGGATCGAGGCTCCGGTCTCGAGTTCGGCCAGTTCCGGTGTGCCGTTGG…	Anopheles lesteri isolate LES02 5.8S ribosomal RNA gene, partial sequence; internal transcribed spacer 2, complete sequence; and 28S ribosomal RNA gene, partial sequence
MG242615	771	species	869073	Psorophora howardii	7182	Psorophora	7157	Culicidae	2759	Eukaryota	D	AAGCACTCTGAATAGAGAGTC	0	TGGTCCGTGTTTCAAGAC	0	389	aatatcaccacgagaccgatagcgaacaagtaccgtgagggaaagttgaaaagcactctgaatagagagtcAAAAAGTACGTGAAACTGCCTAGGGCTCAAGCCCGTTGAACTCGATTATCCGAGCGGAGATATTCACCTGCGGTTGGCCGGCGACGGCAGGCCGCAGGGCACTTATCTCCTGCTTTGCAAGAGGACATTGCGATCCATTACGAAACAGCCAGCCTCGCAAGAGGCAAGGTCGCCCGGCAACTGCCCCCTGGTGTGGTTGTTTGTCCCGCAGTAGCGGCGCTCAGTTCTGAAGGCCTGCGCCGCGAGCCGGGGCTTACCGCACGTGGTGTGCAGCCGGGCGCGTGATGGATTTCCGCGTACACCGTCTCGCATGGGGCAACCCATTGCA…	Psorophora howardii 28S ribosomal RNA gene, partial sequence
MG242613	771	species	7183	Psorophora ferox	7182	Psorophora	7157	Culicidae	2759	Eukaryota	D	AAGCACTCTGAATAGAGAGTC	0	TGGTCCGTGTTTCAAGAC	0	389	aatatcaccacgagaccgatagcgaacaagtaccgtgagggaaagttgaaaagcactctgaatagagagtcAAAAAGTACGTGAAACTGCCTAGGGCTCAAGCCCGTTGAACTCGATTATCCGAGCGGAGATATTCACCTGCGGTTGGCCGGCGACGGCAGGCCGCAGGGCACTTATCTCCTGCTTTGCAAGAGGACATTGCGATCCATTACGAAACAGCCAGCCTCGCAAGAGGCAAGGTCGCCCGGCAACTGCCCCCTGGTGTGGTTGTTTGTCCCGCAGTAGCGGCGCTCAGTTCTGAAGGCCTGCGCCGCGAGCCGGGGCTTACCGCACGTGGTGTGCAGCCGGGCGCGTGATGGATTTCCGCGTACACCGTCTCGCATGGGGCAACCCATTGCA…	Psorophora ferox 28S ribosomal RNA gene, partial sequence
MG242612	772	species	869072	Psorophora cyanescens	7182	Psorophora	7157	Culicidae	2759	Eukaryota	D	AAGCACTCTGAATAGAGAGTC	0	TGGTCCGTGTTTCAAGAC	0	390	aatatcaccacgagaccgatagcgaacaagtaccgtgagggaaagttgaaaagcactctgaatagagagtcAAAAAGTACGTGAAACTGCCTAGGGCTCAAGCCCGTTGAACTCGATTATCCGAGCGGAGATATTCACCTGCGGTTGGCCGGCGACGGCAGGCCGCAGGGCACTTATCTCCTGCTTTGCAAGAGGACATTGCGATCCATTACGAAACAGCCAGCCTCGCAAGAGGCAAGGTCGCCCGGCAACTGCCCCCTGGTGTCGGTTGTTTGTCCCGCAGTAGCGGCGCTCAGTTCTGAAGGCCTGCGCCGCGAGCCGGGGCTTACCGCACGTGGTGTGCAGCCGGGCGCGTGATGGATTTCCGCGTACACCGTCTCGCATGGGGCAACCCATTGC…	Psorophora cyanescens 28S ribosomal RNA gene, partial sequence
MG242611	772	species	869070	Psorophora columbiae	7182	Psorophora	7157	Culicidae	2759	Eukaryota	D	AAGCACTCTGAATAGAGAGTC	0	TGGTCCGTGTTTCAAGAC	0	390	aatatcaccacgagaccgatagcgaacaagtaccgtgagggaaagttgaaaagcactctgaatagagagtcAAAAAGTACGTGAAACTGCCTAGGGCTCAAGCCCGTTGAACTCGATTATCCGAGCGGAGATATTCACCTGCGGTTGGCCGGCGACGGCACGCCGCAGGGCACTTATCTCCTGCTTTGCAAGAGGACATTGCGATCCATTACGAAACAGCCAGCCTCGCGAGAGGCAAGGTCGCCCGGCAACTGCCCCCTGGTGTCGGTTGTTTGTCCCGCAGTAGCGGCGCTCAGTTCTGAAGGCCTGCGCCGCGAGCCGGGGCTTACCGCACGTGGTGTGCAGCCGGGCGCGTGATGGATTTCCGCGGACACCGTCTCGCATGGGGCAACCCATTGC…	Psorophora columbiae 28S ribosomal RNA gene, partial sequence
MG242563	736	species	120873	Ochlerotatus detritus	190765	Ochlerotatus	7157	Culicidae	2759	Eukaryota	D	AAGCACTCTGAATAGAGAGTC	0	TGGTCCGTGTTTCAAGAC	0	375	tatcaccacgagaccgatagcgaacaagtaccgtgagggaaagttgaaaagcactctgaatagagagtcAAAAAGTACGTGAAACTGCCTAGGGCTCAAGCCCGTTGAACTCGATTATCCGAGCGGAGACATTCACCTGCGGTTGGCCCGCCGGCAGGCCGCAGGGCACTTGTCTCCCGCGTCCAAGAGGACATTGCGATCCATTACGAAACAGCTTTCGCGTCGCAAGACGCAAGGTCGCCCGACAGTTGCCCCTTGGTGCCGGTTGCTTGCCCCACAGTAGCGACGCTCAGTTCTGAAGGCCTGTGCCGCGAGGTGGGGCTTACTGCACGTGGTGTTTGCAGTCGGGCGCGTGATGGATTTCCGCGTACACCGCCGGTCTTCCCGCAATGGACCGGC…	Ochlerotatus detritus 28S ribosomal RNA gene, partial sequence
MG242565	747	species	663928	Ochlerotatus dorsalis	190765	Ochlerotatus	7157	Culicidae	2759	Eukaryota	D	AAGCACTCTGAATAGAGAGTC	0	TGGTCCGTGTTTCAAGAC	0	377	aatatcaccacgagaccgatagcgaacaagtaccgtgagggaaagttgaaaagcactctgaatagagagtcAAAAAGTACGTGAAACTGCCTAGGGCTCAAGCCCGTTGAACTCGATTATCCGAGCGGAGACATTCACCTGCGGTTGGCCGGCAACGGTTCGCCGCAGGGCACTTGTCTCTCGCGCACAAGAGGACATTGCGATCCATTACGAAACAGCTTTAGCGTCGCAAGACGCAAGGTCGCCCGACAGTTGCCCCTTGGTGCCGGTTGCTTGCCCCACAGTAGCGACGCTCAGTTCTGAAGGCCTGTGCCGCGAGGTGGGGCTTACTGCACGTGGTGTTTGCAGTCGGGCGCGTGATGGATTTCCGCGTACGCCGCCGGTCTTCCCGCAATGGAC…	Ochlerotatus dorsalis 28S ribosomal RNA gene, partial sequence
MG242544	779	species	866103	Ochlerotatus annulipes	190765	Ochlerotatus	7157	Culicidae	2759	Eukaryota	D	AAGCACTCTGAATAGAGAGTC	0	TTGTCCGTGTTTCAAGAC	1	390	aatatcaccacgagaccgatagcgaacaagtaccgtgagggaaagttgaaaagcactctgaatagagagtcAAAAAGTACGTGAAACTGCCTAGGGCTCAAGCCCGTTGAACTCGATTATCCGAGCGGAGACATTCACCTGCGGTTGGCCGGCTTCCCCCGGGCGGCCGGCAGACCGCAGGGCACTTGTCTACCGCGCCAASGAGGACATTGCGATCCATTACGAAACCGCTCTGGCGTCGCAAGACGCAAGGTCGCCCGACAGTTGCCCCTTGGTGCTTGGTTGCTTGCCCCACAGTAGCGACGCTCAGTTCTGAAGGCCTGTGCCGCGAGGTGGGGCTTACTGCACGTGGTGTTTGCAGTCGGGCGCGTGATGGATTTCCGCGCACGCCGTCGGCCT…	Ochlerotatus annulipes 28S ribosomal RNA gene, partial sequence
KF687542	506	species	332058	Culiseta annulata	174825	Culiseta	7157	Culicidae	2759	Eukaryota	D	AAGCACTCTGAATAGAGAGTC	0	TTGTCCGTGTTTCAAGAC	1	380	aatatcaccacgagaccgatagcgaacaagtaccgtgagggaaagttgaaaagcactctgaatagagagtcAAAAAGTACGTGAAACTGCCTAGGGCTCAAGCCCGTTGAACTCGATTATCCGAGCGGAGATATTCACCTGTGGCTGGCCGGCGACGGCAGGCCACAGGGCACTTATCTCCTGCTTCCACAAGGACATTGCGATCCATTACGAAACGTTGCTCCGCAAGGGGCAATCGCCCGACAATGCCCCCCTGGCACTGGTTGCTTGGTCCACAGTAGCGACGCTCAGTTCTGAAGGCCTGTGCCGCGAGGTGGACCTTACTGTGCGTGGTGTGGCGTCGGGCGCGTGATGGATTTCCGCGCGCACCGTCTCGTATGCTTGCATACACCTCCAGCG…	Culiseta annulata 28S ribosomal RNA gene, partial sequence
GU384706	1631	species	251639	Anopheles pullus	7164	Anopheles	7157	Culicidae	2759	Eukaryota	D	AAGCACTCTGAATAGAGAGTC	0	TGGTCCGTGTTTCAAGAC	0	448	aatatgaccatgagaccgatagtaaacaagtaccgtgtgggaaagttgaaaagcactctgaatagagagtcAAAGAGTACGTGAAACTGCCGAGGGTAAAAAGCCTGTTGAACTCAATTTTCCGTGTCGCAGCAACTCAGTTTTGGCTGTCTAAAAGGGTAGGCATACCCCTTGGACTCCGGAGCGGATTTTGCTCGCGAGTGTGCGGACATCGTGATCCATTACGCAAAACCAATGCGAGCGGCAACGCGAGCATATCCGACACCAGGTCCCAGAACCCGCGGTCGACCCTCTAGTAGTGGCGCATAGCTTAAGGCCAGCGTCGCAAACGGGGGATCGAGGCCCCCGTGGTCTCGAGTTCGGCTAAGTTCAGGTGTGCCGTCGGATGCGTGATGGGCT…	Anopheles pullus isolate PULK06 5.8S ribosomal RNA gene, partial sequence; internal transcribed spacer 2, complete sequence; and 28S ribosomal RNA gene, partial sequence
GU384705	1631	species	251639	Anopheles pullus	7164	Anopheles	7157	Culicidae	2759	Eukaryota	D	AAGCACTCTGAATAGAGAGTC	0	TGGTCCGTGTTTCAAGAC	0	448	aatatgaccatgagaccgatagtaaacaagtaccgtgtgggaaagttgaaaagcactctgaatagagagtcAAAGAGTACGTGAAACTGCCGAGGGTAAAAAGCCTGTTGAACTCAATTTTCCGTGTCGCAGCAACTCAGTTTTGGCTGTCTAAAAGGGTAGGCATACCCCTTGGACTCCGGAGCGGATTTTGCTCGCGAGTGTGCGGACATCGTGATCCATTACGCAAAACCAATGCGAGCGGCAACGCGAGCATATCCGACACCAGGTCCCAGAACCCGCGGTCGACCCTCTAGTAGTGGCGCATAGCTTAAGGCCAGCGTCGCAAACGGGGGATCGAGGCCCCCGTGGTCTCGAGTTCGGCTAAGTTCAGGTGTGCCGTCGGATGCGTGATGGGCT…	Anopheles pullus isolate PULK05 5.8S ribosomal RNA gene, partial sequence; internal transcribed spacer 2, complete sequence; and 28S ribosomal RNA gene, partial sequence
GU384704	1631	species	251639	Anopheles pullus	7164	Anopheles	7157	Culicidae	2759	Eukaryota	D	AAGCACTCTGAATAGAGAGTC	0	TGGTCCGTGTTTCAAGAC	0	448	aatatgaccatgagaccgatagtaaacaagtaccgtgtgggaaagttgaaaagcactctgaatagagagtcAAAGAGTACGTGAAACTGCCGAGGGTAAAAAGCCTGTTGAACTCAATTTTCCGTGTCGCAGCAACTCAGTTTTGGCTGTCTAAAAGGGTAGGCATACCCCTTGGACTCCGGAGCGGATTTTGCTCGCGAGTGTGCGGACATCGTGATCCATTACGCAAAACCAATGCGAGCGGCAACGCGAGCATATCCGACACCAGGTCCCAGAACCCGCGGTCGACCCTCTAGTAGTGGCGCATAGCTTAAGGCCAGCGTCGCAAACGGGGGATCGAGGCCCCCGTGGTCTCGAGTTCGGCTAAGTTCAGGTGTGCCGTCGGATGCGTGATGGGCT…	Anopheles pullus isolate PULK04 5.8S ribosomal RNA gene, partial sequence; internal transcribed spacer 2, complete sequence; and 28S ribosomal RNA gene, partial sequence
GU384703	1632	species	251639	Anopheles pullus	7164	Anopheles	7157	Culicidae	2759	Eukaryota	D	AAGCACTCTGAATAGAGAGTC	0	TGGTCCGTGTTTCAAGAC	0	449	aatatgaccatgagaccgatagtaaacaagtaccgtgtgggaaagttgaaaagcactctgaatagagagtcAAAGAGTACGTGAAACTGCCGAGGGTAAAAAGCCTGTTGAACTCAATTTTCCGTGTCGCAGCAACTCAGTTTTGGCTGTCTAAAAGGGTAGGCATACCCCTTGGACTCCGGAGCGGATTTTGCTCGCGAGTGTGCGGACATCGTGATCCATTACGCAAAACCAATGCGAGCGGCAACGCGAGCATATCCGACACCAGGTCCCAGAACCCGCGGTCGACCCTCTAGTAGTGGCGCATAGCTTAAGGCCAGCGTCGCAAACGGGGGATCGAGGCCCCCGTGGTCTCGAGTTCGGCTAAGTTCAGGTGTGCCGTCGGATGCGTGATGGGCT…	Anopheles pullus isolate PULK03 5.8S ribosomal RNA gene, partial sequence; internal transcribed spacer 2, complete sequence; and 28S ribosomal RNA gene, partial sequence
GU384702	1632	species	251639	Anopheles pullus	7164	Anopheles	7157	Culicidae	2759	Eukaryota	D	AAGCACTCTGAATAGAGAGTC	0	TGGTCCGTGTTTCAAGAC	0	449	aatatgaccatgagaccgatagtaaacaagtaccgtgtgggaaagttgaaaagcactctgaatagagagtcAAAGAGTACGTGAAACTGCCGAGGGTAAAAAGCCTGTTGAACTCAATTTTCCGTGTCGCAGCAACTCAGTTTTGGCTGTCTAAAAGGGTAGGCATACCCCTTGGACTCCGGAGCGGATTTTGCTCGCGAGTGTGCGGACATCGTGATCCATTACGCAAAACCAATGCGAGCGGCAACGCGAGCATATCCGACACCAGGTCCCAGAACCCGCGGTCGACCCTCTAGTAGTGGCGCATAGCTTAAGGCCAGCGTCGCAAACGGGGGATCGAGGCCCCCGTGGTCTCGAGTTCGGCTAAGTTCAGGTGTGCCGTCGGATGCGTGATGGGCT…	Anopheles pullus isolate PULK02 5.8S ribosomal RNA gene, partial sequence; internal transcribed spacer 2, complete sequence; and 28S ribosomal RNA gene, partial sequence
GU384701	1631	species	251639	Anopheles pullus	7164	Anopheles	7157	Culicidae	2759	Eukaryota	D	AAGCACTCTGAATAGAGAGTC	0	TGGTCCGTGTTTCAAGAC	0	448	aatatgaccatgagaccgatagtaaacaagtaccgtgtgggaaagttgaaaagcactctgaatagagagtcAAAGAGTACGTGAAACTGCCGAGGGTAAAAAGCCTGTTGAACTCAATTTTCCGTGTCGCAGCAACTCAGTTTTGGCTGTCTAAAAGGGTAGGCATACCCCTTGGACTCCGGAGCGGATTTTGCTCGCGAGTGTGCGGACATCGTGATCCATTACGCAAAACCAATGCGAGCGGCAACGCGAGCATATCCGACACCAGGTCCCAGAACCCGCGGTCGACCCTCTAGTAGTGGCGCATAGCTTAAGGCCAGCGTCGCAAACGGGGGATCGAGGCCCCCGTGGTCTCGAGTTCGGCTAAGTTCAGGTGTGCCGTCGGATGCGTGATGGGCT…	Anopheles pullus isolate PULK01 5.8S ribosomal RNA gene, partial sequence; internal transcribed spacer 2, complete sequence; and 28S ribosomal RNA gene, partial sequence
KF687543	506	species	1245330	Culiseta nipponica	174825	Culiseta	7157	Culicidae	2759	Eukaryota	D	AAGCACTCTGAATAGAGAGTC	0	TTTTTCGTGTTTCAAGAC	3	383	aatatcaccacgagaccgatagcgaacaagtaccgtgagggaaagttgaaaagcactctgaatagagagtcAAAAAGTACGTGAAACTGCCTAGGGCTCAAGCCCGTTGAACTCGATTATCCGAGCGGAGATATTCACTTGCGGCTGGCCGGGGACGGCACGCCACAGGGCACTTATCTCCTGCTTCCACAAGGACATTGCGATCCATTACGAAACGTTGCCCCTCACGGGGCAATCGCCCGACAACTGCCCCTTGGCGCTGGTTGCTTGTCCCACAGTAGCGACGCTCAGTTCTGAAGGCCTGTGTCGCGAGGTGGGGCTTACTGCGCGTGGTGTGCAGTCGGGCGCGTGATGGATTCCCGCGTACACCGTCTCGTATCCCTCGCGGATACACCTCCA…	Culiseta nipponica 28S ribosomal RNA gene, partial sequence
KF687517	527	species	1214266	Culex hayashii	7174	Culex	7157	Culicidae	2759	Eukaryota	D	AAGCACTCTGAATAGAGAGTC	0	CTGTCCGTGTTTCAAGAC	2	403	aatatcaccacgagaccgatagcgaacaagtaccgtgagggaaagttgaaaagcactctgaatagagagtcAAAAAGTACGTGAAACTGCCTAGGGCTCAAGCCCGTTGAACTCGATTATCCGCAGCGGAGATATTCACCTGTGGCCGGGCGGGGGGTCCCCTCCCCGTCAGCCACAGGGCACTTGTCTCCTGCTTCACGAGGACATTGCGATCCATTACGAAACGCAGTCACTGCCCCGCAGTGACTATGAGGCCCGGCCACTGCCCCTTGGCACCTTGGTTGCTTGTCCCACAGTAGCGGCGCTCAGTTCGGAAGGCCTGCGCCGCAACCTGGGGCTTACCGGTGCGTGGTGTGCAGCCGGGCGCGTGATGGATTCCAGCGTACACCGTCGCGTGAC…	Culex hayashii 28S ribosomal RNA gene, partial sequence
GU384713	1640	species	296717	Anopheles kleini	7164	Anopheles	7157	Culicidae	2759	Eukaryota	D	AAGCACTCTGAATAGAGAGTC	0	TGGTCCGTGTTTCAAGAC	0	459	aatacgaccatgagaccgatagtaaacaagtaccgtgtgggaaagttgaaaagcactctgaatagagagtcAAATAGTACGTGAAACTGCCGAGGGTGTAAAGCCTGTTGAACTCGATTATCCGTAGTTTCTGGCAACGTGGGTTTTGGCTGTCACGCAGAAGGGGGCAAATGCTCTCTTCTGTATGCCTTGATCCTAGCCAGGAACGAGTGCGGACATCGTGATCCATTACGCAAACCAAATGCGAGCGGCGACTCCGGTTGCTGCGAGCATATCCAACATCAGGTCCCAGAACATGCGGTCGACCCTCTAGTAGTGGCGCTCAGCTTAAGGCCGGCGTCGCGAACGGGGGATCGAGGCTCCGGTCTCGAGTTCGGCTAGTTCAGGTGTGCCGTTGGA…	Anopheles kleini isolate KLEK01 5.8S ribosomal RNA gene, partial sequence; internal transcribed spacer 2, complete sequence; and 28S ribosomal RNA gene, partial sequence
GU384700	1648	species	74873	Anopheles sinensis	7164	Anopheles	7157	Culicidae	2759	Eukaryota	D	AAGCACTCTGAATAGAGAGTC	0	TGGTCCGTGTTTCAAGAC	0	450	aatacgaccatgagaccgatagtaaacaagtaccgtgtgggaaagttgaaaagcactctgaatagagagtcAAATAGTACGTGAAACTGCCGAGGGTGTAAAGCCTGTTGAACTCGATTATCCGTAGTTCCTGGCATCGTGGGTTTTGGCTGTCACGCAGAAGGGGGCCTTCTGTATGCCTTGACCCTAGCCAGGAACGAGTGCGGACATCGTGATCCATTACGCAAACCAAATGCGAGCGGCGACTCCGGTTGCTGCGAGCATATCCAACATCAGGTCCCAGAACATGCGGTCGACCCTCTAGTAGTGGCGCTCAGCTTAAGGCCGGCGTTGCGAACGGGGGATCGAGGCTCCGGTCTCGAGTTCGGCTAGTTCCGGTGTGCCGTTGGATGCGTGATG…	Anopheles sinensis isolate SINC01 5.8S ribosomal RNA gene, partial sequence; internal transcribed spacer 2, complete sequence; and 28S ribosomal RNA gene, partial sequence
GU384696	1648	species	74873	Anopheles sinensis	7164	Anopheles	7157	Culicidae	2759	Eukaryota	D	AAGCACTCTGAATAGAGAGTC	0	TGGTCCGTGTTTCAAGAC	0	450	aatacgaccatgagaccgatagtaaacaagtaccgtgtgggaaagttgaaaagcactctgaatagagagtcAAATAGTACGTGAAACTGCCGAGGGTGTAAAGCCTGTTGAACTCGATTATCCGTAGTTCCTGGCATCGTGGGTTTTGGCTGTCACGCAGAAGGGGGCCTTCTGTATGCCTTGACCCTAGCCAGGAACGAGTGCGGACATCGTGATCCATTACGCAAACCAAATGCGAGCGGCGACTCCGGTTGCTGCGAGCATATCCAACATCAGGTCCCAGAACATGCGGTCGACCCTCTAGTAGTGGCGCTCAGCTTAAGGCCGGCGTCGCCAACGGGGGATCGAGGCTCCGGTCTCGAGTTCGGCTAGTTCCGGTGTGCCGTTGGATGCGTGATG…	Anopheles sinensis isolate SINK06 5.8S ribosomal RNA gene, partial sequence; internal transcribed spacer 2, complete sequence; and 28S ribosomal RNA gene, partial sequence
GU384695	1648	species	74873	Anopheles sinensis	7164	Anopheles	7157	Culicidae	2759	Eukaryota	D	AAGCACTCTGAATAGAGAGTC	0	TGGTCCGTGTTTCAAGAC	0	450	aatacgaccatgagaccgatagtaaacaagtaccgtgtgggaaagttgaaaagcactctgaatagagagtcAAATAGTACGTGAAACTGCCGAGGGTGTAAAGCCTGTTGAACTCGATTATCCGTAGTTCCTGGCATCGTGGGTTTTGGCTGTCACGCAGAAGGGGGCCTTCTGTATGCCTTGACCCTAGCCAGGAACGAGTGCGGACATCGTGATCCATTACGCAAACCAAATGCGAGCGGCGACTCCGGTTGCTGCGAGCATATCCAACATCGGGTCCCAGAACATGCGGTCGACCCTCTAGTAGTGGCGCTCAGCTTAAGGCCGGCGTCGCGAACGGGGGATCGAGGCTCCGGTCTCGAGTTCGGCTAGTTCCGGTGTGCCGTTGGATGCGTGATG…	Anopheles sinensis isolate SINK05 5.8S ribosomal RNA gene, partial sequence; internal transcribed spacer 2, complete sequence; and 28S ribosomal RNA gene, partial sequence
GU384694	1648	species	74873	Anopheles sinensis	7164	Anopheles	7157	Culicidae	2759	Eukaryota	D	AAGCACTCTGAATAGAGAGTC	0	TGGTCCGTGTTTCAAGAC	0	450	aatacgaccatgagaccgatagtaaacaagtaccgtgtgggaaagttgaaaagcactctgaatagagagtcAAATAGTACGTGAAACTGCCGAGGGTGTAAAGCCTGTTGAACTCGATTATCCGTAGTTCCTGGCATCGTGGGTTTTGGCTGTCACGCAGAAGGGGGCCTTCTGTATGCCTTGACCCTAGCCAGGAACGAGTGCGGACATCGTGATCCATTACGCAAACCAAATGCGAGCGGCGACTCCGGTTGCTGCGAGCATATCCAACATCAGGTCCCAGAACATGCGGTCGACCCTCTAGTAGTGGCGCTCAGCTTAAGGCCGGCGTCGCGAACGGGGGATCGAGGCTCCGGTCTCGAGTTCGGCTAGTTCCGGTGTGCCGTTGGATGCGTGATG…	Anopheles sinensis isolate SINK04 5.8S ribosomal RNA gene, partial sequence; internal transcribed spacer 2, complete sequence; and 28S ribosomal RNA gene, partial sequence
GU384693	1651	species	74873	Anopheles sinensis	7164	Anopheles	7157	Culicidae	2759	Eukaryota	D	AAGCACTCTGAATAGAGAGTC	0	TGGTCCGTGTTTCAAGAC	0	450	aatacgaccatgagaccgatagtaaacaagtaccgtgtgggaaagttgaaaagcactctgaatagagagtcAAATAGTACGTGAAACTGCCGAGGGTGTAAAGCCTGTTGAACTCGATTATCCGTAGTTCCTGGCATCGTGGGTTTTGGCTGTCACGCAGAAGGGGGCCTTCTGTATGCCTTGACCCTAGCCAGGAACGAGTGCGGACATCGTGATCCATTACGCAAACCAAATGCGAGCGGCGACTCCGGTTGCTGCGAGCATATCCAACATCAGGTCCCAGAACATGCGGTCGACCCTCTAGTAGTGGCGCTCAGCTTAAGGCCGGCGTCGCGAACGGGGGATCGAGGCTCCGGTCTCGAGTTCGGCTAGTTCCGGTGTGCCGTTGGATGCGTGATG…	Anopheles sinensis isolate SINK03 5.8S ribosomal RNA gene, partial sequence; internal transcribed spacer 2, complete sequence; and 28S ribosomal RNA gene, partial sequence
GU384692	1648	species	74873	Anopheles sinensis	7164	Anopheles	7157	Culicidae	2759	Eukaryota	D	AAGCACTCTGAATAGAGAGTC	0	TGGTCCGTGTTTCAAGAC	0	450	aatacgaccatgagaccgatagtaaacaagtaccgtgtgggaaagttgaaaagcactctgaatagagagtcAAATAGTACGTGAAACTGCCGAGGGTGTAAAGCCTGTTGAACTCGATTATCCGTAGTTCCTGGCATCGTGGGTTTTGGCTGTCACGCAGAAGGGGGCCTTCTGTATGCCTTGACCCTAGCCAGGAACGAGTGCGGACATCGTGATCCATTACGCAAACCAAATGCGAGCGGCGACTCCGGTTGCTGCGAGCATATCCAACATCAGGTCCCAGAACATGCGGTCGACCCTCTAGTAGTGGCGCTCAGCTTAAGGCCGGCGTCGCGAACGGGGGATCGAGGCTCCGGTCTCGAGTTCGGCTAGTTCCGGTGTGCCGTTGGATGCGTGATG…	Anopheles sinensis isolate SINK02 5.8S ribosomal RNA gene, partial sequence; internal transcribed spacer 2, complete sequence; and 28S ribosomal RNA gene, partial sequence
GU384691	1648	species	74873	Anopheles sinensis	7164	Anopheles	7157	Culicidae	2759	Eukaryota	D	AAGCACTCTGAATAGAGAGTC	0	TGGTCCGTGTTTCAAGAC	0	450	aatacgaccatgagaccgatagtaaacaagtaccgtgtgggaaagttgaaaagcactctgaatagagagtcAAATAGTACGTGAAACTGCCGAGGGTGTAAAGCCTGTTGAACTCGATTATCCGTAGTTCCTGGCATCGTGGGTTTTGGCTGTCACGCAGAAGGGGGCCTTCTGTATGCCTTGACCCTAGCCAGGAACGAGTGCGGACATCGTGATCCATTACGCAAACCAAATGCGAGCGGCGACTCCGGTTGCTGCGAGCATATCCAACATCAGGTCCCAGAACATGCGGTCGACCCTCTAGTAGTGGCGCTCAGCTTAAGGCCGGCGTCGCGAACGGGGGATCGAGGCTCCGGTCTCGAGTTCGGCTAGTTCCGGTGTGCCGTTGGATGCGTGATG…	Anopheles sinensis isolate SINK01 5.8S ribosomal RNA gene, partial sequence; internal transcribed spacer 2, complete sequence; and 28S ribosomal RNA gene, partial sequence
MG242607	796	species	124917	Armigeres subalbatus	124916	Armigeres	7157	Culicidae	2759	Eukaryota	D	AAGCACTCTGAATAGAGAGTC	0	TGGTYCGTGTTTCAAGAC	1	391	aatatcaccacgagaccgatagcgaacaagtaccgtgagggaaagttgaaaagcactctgaatagagagtcAAAAAGTACGTGAAACTGCCTAGGGCTCAAGCCCGTTGAACTCGATTATCCGAGCGGAGACATTCACCTGCGGGGCTGGCCTTCCCAGGGCCGGCGCCGCAGGGCACTTGTCTCTCCCGCGCACGAGGACACTGCGATCCATTACGAAACAGCTTTCGCGTTCCACTGGGACGCGCAGGTCGCCCGACAGTTGCCCCCTGGTGCTTCCCCCGGTTGCTTGCCCCACAGTAGCGACGCTCAGTTCCGAAGGCCTGTGCCGCGAGGTGGGGCTTACTGCACGTGGTGTGCAGTCGGGCGCGTGATGGATTCCCACGAGTACGACGCGGTG…	Armigeres subalbatus 28S ribosomal RNA gene, partial sequence
KF687527	522	species	308735	Mansonia uniformis	149459	Mansonia	7157	Culicidae	2759	Eukaryota	D	AAGCACTCTGAATAGAGAGTC	0	TTGTCCGTGTTTCAAGAC	1	395	aatatcaccacgagaccgatagcgaacaagtaccgtgagggaaagttgaaaagcactctgaatagagagtcAAAAAGTACGTGAAACTGCCTAGGGCTCAAGCCCGTTGAACTCGATTATCCGCAGCGGAGATATTCACCTGTGGCTGGCCGGTAGCGGCAGTGCCACAGGGCACTTATCTCCTGCTTCCGCAAGGACATTGCGATCCATTACGAAACCAGTTTTGCCAGCTGCGCAAAAACTGCCCGACACTCTGCCCCCGGCGTGGTCGCTCGCTCCACCGTAGCGGCACTCAGTTCTGAAGGCCTGTGCCGCCAGCTGGAGCTTACCACGCCTTGGTGTGCAGTCGGGCGCGTGATGGACTCCCACCGGACACCGTCCCGTATACACACCGTGTAT…	Mansonia uniformis 28S ribosomal RNA gene, partial sequence
KF687518	505	species	325443	Culex minor	7174	Culex	7157	Culicidae	2759	Eukaryota	D	AAGCACTCTGAATAGAGAGTC	0	CTTTCCGTGTTTCAAGAC	3	390	aatatcaccacgagaccgatagcgaacaagtaccgtgagggaaagttgaaaagcactctgaatagagagtcAAAAAGTACGTGAAACTGCCTAGGGCTCAAGCCCGTTGAACTCGATTATCCGCAGCGGAGATATTCACCTGTGGCTGGCCCGCGAGGGTCCACCGCAGGGCACTTGTCTCCTGCTTCACGAGGACACTGCGATCCATTACGAAACGCGTTAGTCGCTTATCCGACTACAGGCCCGGCAATTGCCCCTTGGCATCTGGTTGCTTGTCCCACAGTAGCGGCGCTCAGTTCGGAAGGCCTGCGTCGCAACCTGGGGCTTACCGGTGCGTGGTGTGCAGCCGGGCGCGTGATGGATTCCCGCGTACACCGTCTCGGGTGCGCTTGCGCACCC…	Culex minor 28S ribosomal RNA gene, partial sequence
KF687516	518	species	1245329	Lutzia halifaxii	53533	Lutzia	7157	Culicidae	2759	Eukaryota	D	AAGCACTCTGAATAGAGAGTC	0	TTTTCCGTGTTTCAAGAC	2	395	aatatcaccacgagaccgatagcgaacaagtaccgtgagggaaagttgaaaagcactctgaatagagagtcAAAAAGTACGTGAAACTGCCTAGGGCTCAAGCCCGTTGAACTCGATTATCCGCGGCGGAGATATTCACCTGCGGCCGCCCTCGGTCCGCCGGGGGCCACCGCAGGGCACTTACCTCCTGCCTCACGAGGACGTTGCGATCCATTACGAAACACGGTTAGCCAGGCAACTGGCTACAGGCCCGGCAATTGCCCCTTGGCACCTGGTTGCTTGTCCCACAGTAGCGGCGCTCAGTTCGGAAGGCCTGCGTCGCAACCTGGGGCTTACCGGTGCGTGGTGTGCAGCCGGGCGCGTGATGGATTCCCGCGTACACCGTCTCGGGTGCTTGCT…	Lutzia halifaxii 28S ribosomal RNA gene, partial sequence
GU384698	1648	species	74873	Anopheles sinensis	7164	Anopheles	7157	Culicidae	2759	Eukaryota	D	AAGCACTCCGAATAGAGAGTC	1	TGGTCCGTGTTTCAAGAC	0	450	aatacgaccatgagaccgatagtaaacaagtaccgtgtgggaaagttgaaaagcactccgaatagagagtcAAATAGTACGTGAAACTGCCGAGGGTGTAAAGCCTGTTGAACTCGATTATCCGTAGTTCCTGGCATCGTGGGTTTTGGCTGTCACGCAGAAGGGGGCCTTCTGTATGCCTTGACCCTAGCCAGGAACGAGTGCGGACATCGTGATCCATTACGCAAACCAAATGCGAGCGGCGACTCCGGTTGCTGCGAGCATATCCAACATCAGGTCCCAGAACATGCGGTCGACCCTCTAGTAGTGGCGCTCAGCTTAAGGCCGGCGTCGCGAACGGGGGATCGAGGCTCCGGTCTCGAGTTCGGCTAGTTCCGGTGTGCCGTTGGATGCGTGATG…	Anopheles sinensis isolate SINT01 5.8S ribosomal RNA gene, partial sequence; internal transcribed spacer 2, complete sequence; and 28S ribosomal RNA gene, partial sequence
KF687537	512	species	325430	Orthopodomyia anopheloides	139053	Orthopodomyia	7157	Culicidae	2759	Eukaryota	D	AAGCACTCTGAATAGAGAGTC	0	TGGTCCGTGTTTCAAGAC	0	389	aatatcaccacgagaccgatagcgaacaagtaccgtgagggaaagttgaaaagcactctgaatagagagtcAAAAAGTACGTGAAACTGCCTAGGGCTCAAACCCGTTGAACTCGATTATCCTCGGCGGAGGTATTCACTTGTGGCCGGGCCTCAGAAACCCCGCCACACGGCACTTACCTCCCGCCTGCGCGGACATTGCGATCCATTACGAGAACGCTCTCGCAAGAGACAATGCCCGACACCTGCCCCTTGGCGCATGGTTGTTGGCTCCCGCAGTAGCGGCGCTCAGTTCTGAAGGCCTGCGTCGCGACCCGGGGCTTACTGCGCGTGGTGTGCAGTCGGGCGCGTGATGGATTCCCACGGACACCGTCTGGTATGGCTTCGTCATACACCCTCC…	Orthopodomyia anopheloides 28S ribosomal RNA gene, partial sequence
KF687519	512	species	545656	Culex modestus	7174	Culex	7157	Culicidae	2759	Eukaryota	D	AAGCACTCTGAATAGAGAGTC	0	TTTTCCGTGTTTCAAGAC	2	389	aatatcaccacgagaccgatagcgaacaagtaccgtgagggaaagttgaaaagcactctgaatagagagtcAAAAAGTACGTGAAACTGCCTAGGGCTCAAGCCCGTTGAACTCGATTATCCGCGGCGGAGATATTCACCTGCGGCTGGCCCTTTCCGGGTTCACCGCAGGGCACTTACCTCCTGCCTCACGAGGACGTTGCGATCCATTACGAAACACTCTAGCCAGGCAACTGGCTACAGGCCCGGCAACTGCCCCTTGGCATCTGGTTGCTTGTCCCACAGTAGCGGCGCTCAGTTCGGAAGGCCTGTGTCGCGACCTGGGGCTTACCGGTGCGTGGTGTGCAGCCGGGCGCGTGATGGATTCCCGCGGACACCGTCTCGGGTGCTTGCTCACCTA…	Culex modestus 28S ribosomal RNA gene, partial sequence
KF687513	508	species	308723	Culex nigropunctatus	7174	Culex	7157	Culicidae	2759	Eukaryota	D	AAGCACTCTGAATAGAGAGTC	0	TTTTCCGTGTTTCAAGAC	2	386	aatatcaccacgagaccgatagcgaacaagtaccgtgagggaaagttgaaaagcactctgaatagagagtcAAAAAGTACGTGAAACTGCCTAGGGCTCAAGCCCGTTGAACTCGATTATCCGCGGCGGAGATATTCACCTGCGGCTGGCCGGCCCTCCGGTCCACCGTAGGGCACTTACCTCCTGCCTCACGAGGACGTTGCGATCCATTACGAAACAGGTTAGTCAGCAATGGCTACAGGCCCGGCACTTGCCCCTTGGCATCTGGTTGCTTGTCCCACAGTAGCGGCGCTCAGTTCGGAAGGCCTGCGTCGCAACCTGGGGCTTACCGGTGCGTGGTGTGCAGCCGGGCGCGTGATGGATTCCCGCGTACACCGTCTCGGGTGCTTGCACCCACCT…	Culex nigropunctatus 28S ribosomal RNA gene, partial sequence
KF687512	511	species	162998	Culex sitiens	7174	Culex	7157	Culicidae	2759	Eukaryota	D	AAGCACTCTGAATAGAGAGTC	0	TTGTCCGTGTTTCAAGAC	1	390	aatatcaccacgagaccgatagcgaacaagtaccgtgagggaaagttgaaaagcactctgaatagagagtcAAAAAGTACGTGAAACTGCCTAGGGCTCAAGCCCGTTGAACTCGATTATCCGCGGCGGAGATATTCACCTGCGGCTGGCCTTCACCGGTTTACCGCAGGGCACTTACCTCCTGCCTCACGAGGACGCTGCGATCCATTACGAAACATGTGCTAGTCACGCAAGTGGCTACAGGCCCGGCAATTGCCCCTTGGCATCTGGTTGCTTGCCCCACAGTAGCGGCGCTCAGTTCGGAAGGCCTGCGTCGCAACCTGGGGCTTACCGGTGCGTGGTGTGCAGCCGGGCGCGTGATGGATTCCCGCGTACACCGTCTCGGGTGCTTGCTCACCC…	Culex sitiens 28S ribosomal RNA gene, partial sequence
JX624228	654	species	30069	Anopheles stephensi	7164	Anopheles	7157	Culicidae	2759	Eukaryota	D	AAGCACTCTGAATAGAGAGTC	0	GGTCCCGGTTTTCAAGAC	5	390	aatatcaccacgagaccgatagcgaacaagtaccgtgagggaaagttgaaaagcactctgaatagagagtcAAAAAGTACGTGAAACTGCCTAGGGCTCAAGCCCGTTGAACTCGATTATCCGCGGCGGAGATATTCACCTGCGGTTGGCCCTCACCCGGTCCGCCGCAGGGCACTTACCTCCTGCCTCACGAGGACGTTGCGATCCATTACGAAACGGTTAGCCAGCGATGGCTACAGGCCCGGCACCTGCCCCTTGGCATCTGGTTGCTTGTCCCACAGTAGCGGCGCTCAGTTCGGAAGGCCTGCGCCGCAACCTGGGGCTTACCGGTGCGTGGTGTGCAGCCGGGCGCGTGATGGATTCCCGCGTACACCGTCTCGGGAGAGGCTCGCCTCTCCC…	Anopheles stephensi voucher UMZD224 28S ribosomal RNA gene, partial sequence
JX624228	654	species	30069	Anopheles stephensi	7164	Anopheles	7157	Culicidae	2759	Eukaryota	D	AAGCACTCTGAATAGAGAGTC	0	TTGGTCCTGTTTCAAGAC	4	533	aatatcaccacgagaccgatagcgaacaagtaccgtgagggaaagttgaaaagcactctgaatagagagtcAAAAAGTACGTGAAACTGCCTAGGGCTCAAGCCCGTTGAACTCGATTATCCGCGGCGGAGATATTCACCTGCGGTTGGCCCTCACCCGGTCCGCCGCAGGGCACTTACCTCCTGCCTCACGAGGACGTTGCGATCCATTACGAAACGGTTAGCCAGCGATGGCTACAGGCCCGGCACCTGCCCCTTGGCATCTGGTTGCTTGTCCCACAGTAGCGGCGCTCAGTTCGGAAGGCCTGCGCCGCAACCTGGGGCTTACCGGTGCGTGGTGTGCAGCCGGGCGCGTGATGGATTCCCGCGTACACCGTCTCGGGAGAGGCTCGCCTCTCCC…	Anopheles stephensi voucher UMZD224 28S ribosomal RNA gene, partial sequence
HM807288	495	species	7176	Culex quinquefasciatus	7174	Culex	7157	Culicidae	2759	Eukaryota	D	AAGCACTCTGAATAGAGAGTC	0	TTGTCCGTGTTTCAAGAC	1	390	aatatcaccacgagaccgatagcgaacaagtaccgtgagggaaagttgaaaagcactctgaatagagagtcAAAAAGTACGTGAAACTGCCTAGGGCTCAAGCCCGTTGAACTCGATTATCCGCGGCGGAGATATTCACCTGCGGTTGGCCCTCACCCGGTCCGCCGCAGGGCACTTACCTCCTGCCTCACGAGGACGTTGCGATCCATTACAAAACGGTTAGCCAGCGATGGCTACAGGCCCGGCACCTGCCCCTTGGCATCTGGTTGCTTGTCCCACAGTAGCGGCGCTCAGTTCGGAAGGCCTGCGCCGCAACCTGGGGCTTACCGGTGCGTGGTGTGCAGCCGGGCGCGTGATGGATTCCCGCGTACACCGTCTCGGGAGAGGCTCGCCTCTCCC…	Culex quinquefasciatus isolate 03TNV 28S ribosomal RNA gene, partial sequence
HM807287	500	species	7176	Culex quinquefasciatus	7174	Culex	7157	Culicidae	2759	Eukaryota	D	AAGCACTCTGAATAGAGAGTC	0	TGTCCGGTGTTTCAAGAC	3	390	aatatcaccacgagaccgatagcgaacaagtaccgtgagggaaagttgaaaagcactctgaatagagagtcAAAAAGTACGTGAAACTGCCTAGGGCTCAAGCCCGTTGAACTCGATTATCCGCGGCGGAGATATTCACCTGCGGTTGGCCCTCACCCGGTCCGCCGCAGGGCACTTACCTCCTGCCTCACGAGGACGTTGCGATCCATTACGAAACGGTTAGCCAGCGATGGCTACAGGCCCGGCACCTGCCCCTTGGCATCTGGTTGCTTGTCCCACAGTAGCGGCGCTCAGTTCGGAAGGCCTGCGCCGCAACCTGGGGCTTACCGGTGCGTGGTGTGCAGCCGGGCGCGTGATGGATTCCCGCGTACACCGTCTCGGGAGAGGCTCGCCTCTCCC…	Culex quinquefasciatus isolate 02KAN 28S ribosomal RNA gene, partial sequence
HM807289	501	species	7176	Culex quinquefasciatus	7174	Culex	7157	Culicidae	2759	Eukaryota	D	AAGCATTCTGAATAGAGAGTC	1	TGGTCCGTGTTTCAAGAC	0	390	aatatcaccacgagaccgatagcgaacaagtaccgtgagggaaagttgaaaagcattctgaatagagagtcAAAAAGTACGTGAAACTGCCTAGGGCTCAAGCCCGTTGAACTCGATTATCCGCGGCGGAGATATTCACCTGCGGTTGGCCCTCACCCGGTCCGCCGCAGGGCACTTACCTCCTGCCTCACGAGGACGTTGCGATCCATTACGAAACGGTTAGCCAGCGATGGCTACAGGCCCGGCACCTGCCCCTTGGCATCTGGTTGCTTGTCCCACAGTAGCGGCGCTCAGTTCGGAAGGCCTGCGCCGCAACCTGGGGCTTACCGGTGCGTGGTGTGCAGCCGGGCGCGTGATGGATTCCCGCGTACACCGTCTCGGGAGAGGCTCGCCTCTCCC…	Culex quinquefasciatus 28S ribosomal RNA gene, partial sequence
HM802160	493	species	7176	Culex quinquefasciatus	7174	Culex	7157	Culicidae	2759	Eukaryota	D	AAGCACTCTGAATAGAGAGTC	0	GGTCCCGGTTTTCAAGAC	5	390	aatatcaccacgagaccgatagcgaacaagtaccgtgagggaaagttgaaaagcactctgaatagagagtcAAAAAGTACGTGAAACTGCCTAGGGCTCAAGCCCGTTGAACTCGATTATCCGCGGCGGAGATATTCACCTGCGGTTGGCCCTCACCCGGTCCGCCGCAGGGCACTTACCTCCTGCCTCACGAGGACGTTGCGATCCATTACGAAACGGTTAGCCAGCGATGGCTACAGGCCCGGCACCTGCCCCTTGGCATCTGGTTGCTTGTCCCACAGTAGCGGCGCTCAGTTCGGAAGGCCTGCGCCGCAACCTGGGGCTTACCGGTGCGTGGTGTGCAGCCGGGCGCGTGATGGATTCCCGCGTACACCGTCTCGGGAGAGGCTCGCCTCTCCC…	Culex quinquefasciatus isolate 10 TRI 28S ribosomal RNA gene, partial sequence
MG242559	730	species	329099	Ochlerotatus communis	190765	Ochlerotatus	7157	Culicidae	2759	Eukaryota	D	AAGCACTCTGAATAGAGAGTC	0	TGGTCCGTGTTTCAAGAC	0	379	agaccgatagcgaacaagtaccgtgagggaaagttgaaaagcactctgaatagagagtcAAAAAGTACGTGAAACTGCCTAGGGCTCAAGCCCGTTGAACTCGATTATCCGAGCGGAGACATTCACCTGTGGTTGGCCGGTTCCGCCGGCAGGCCGCAGGGCACTTGTCTCCCGCGTCACGAGGACATTGCGATCCATTACGAAACAGCTTTCGCGTCGCAAGACGCAAGGTCGCCCGACAGTTGCCCCTTGGTGCTGGTTGCTTGCCCCACAGTAGCGACGCTCAGTTCTGAAGGCCTGTGCCGCGAGGTGGGGCTTACTGCACGTGGTGTTTGCAGTCGGGCGCGTGATGGATTTCCGCGTACACCGCCGGTCTTCCCGCAATGGACCGGCGGACTG…	Ochlerotatus communis 28S ribosomal RNA gene, partial sequence
JX070789	575	species	74873	Anopheles sinensis	7164	Anopheles	7157	Culicidae	2759	Eukaryota	D	AAGCACTCTGAATAGAGAGTC	0	TTTTCCGTGTTTCAAGAC	2	450	aatacgaccatgagaccgatagtaaacaagtaccgtgtgggaaagttgaaaagcactctgaatagagagtcAAATAGTACGTGAAACTGCCGAGGGTGTAAAGCCTGTTGAACTCGATTATCCGTAGTTCCTGGCATCGTGGGTTTTGGCTGTCACGCAGAAGGGGGCCTTCTGTATGCCTTGACCCTAGCCAGGAACGAGTGCGGACATCGTGATCCATTACGCAAACCAAATGCGAGCGGCGACTCCGGTTGCTGCGAGCATATCCAACATCAGGTCCCAGAACATGCGGTCGACCCTCTAGTAGTGGCGCTCAGCTTAAGGCCGGCGTCGCGAACGGGGGATCGAGGCTCCGGTCTCGAGTTCGGCTAGTTCCGGTGTGCCGTTGGATGCGTGATG…	Anopheles sinensis isolate D2_146A 28S ribosomal RNA gene, partial sequence
KF687515	480	species	7178	Culex tritaeniorhynchus	7174	Culex	7157	Culicidae	2759	Eukaryota	D	AAGCACTCTGAATAGAGAGTC	0	TTGTCCGTGTTTCAAGGC	2	383	accacgagaccgatagcgaacaagtaccgtgagggaaagttgaaaagcactctgaatagagagtcAAAAAGTACGTGAAACTGCCTAGGGCTCAAGCCCGTTGAACTCGATTATCCGCGGCGGAGATATTCACCTGCGGCTGGCCTTCACCGGTTCACCGCAGGGCACTTACCTCCTGCCTCACGAGGACGTTGCGATCCATTACGAAACGGTTTACTCGCCATGGGTTCCAGGCCCGGCACTGGCCCCTGGCAACTGGTTGCTTGTCCCACAGTAGCGGCGCTCAGTTCGGAAGGCCTGCGCCGCAACCTGGGGCTTACCGGTGCGTGGTGTGCAGCCGGGCGCGTGATGGATTCCCGCGTACACCGTCTCGGGAGCTTGCACCCACCTCCCCCAAGG…	Culex tritaeniorhynchus 28S ribosomal RNA gene, partial sequence
JX070798	590	species	206113	Anopheles peditaeniatus	7164	Anopheles	7157	Culicidae	2759	Eukaryota	D	AAGCACTCTGAATAGAGAGTC	0	TTGTCCGTGTTTCAAGAC	1	462	aatacaaccatgagaccgatagtaaacaagtaccgtgagggaaagttgaaaagcactctgaatagagagtcAAAGAGTACGTGAAACTGCCAAGGGTGTAAAGCTTGTGGAACTCAACCTGTAGTTACGAACCGTAATGATTATGCCAAAACCGTGTCGCGGAGCGCTCCCTCGGAGTCGTCCCGTCCTTTTGGCGTACCATGACCGGTTCGCACGCTGCCATCGTGATCCATTACGAAGTGGGCGCGGCGACCCTCCGGGGTTGCTGCAAACATGTCTGACACAAGGTCCCGGAACCAATGCGGTCGACCCTCTAGTAGTGGCGCTCAGCTTAACGCCGGCGTCGCGAACGGGGGATTGAGGCTCCGGTCTCAAGTTCGGCTAGGTTCAGGTGTGCCG…	Anopheles peditaeniatus isolate D2_214 28S ribosomal RNA gene, partial sequence
JX070787	535	species	112267	Anopheles barbirostris	7164	Anopheles	7157	Culicidae	2759	Eukaryota	D	AAGCACTCTGAATAGAGAGTC	0	TTGTCCGTGTTTCAAGAC	1	413	aatataaccatgagaccgatagaagacaagtaccgtgagggaaagttgaaaagcactctgaatagagagtcAAATAGTACGTGAAACCATCTAGGATATTACAAACCTATGGAACCTGGCAGAACCGGGGCAGAGATATTCAACTGCGTGTGGGTTGCTTACGCTTCCGCCGCAGGGCACTTATCTGCTGCAGCGTACCGGCATCGCGATCCATTACAAGGGGTTAAAGGTGGCGCGCAAGCGCTGCCTTGTATCTGGCACCAAAGGTCCCAGGCTCGCACTGGCGTCCCTCTAGTAGCGCTCACTAAGTCAAGCACCCGGTGGCGCAAACGGGGGGTCGAGGCTTCGGTCTCGTGTTCGGTCGAGCTACGGTGTACCGCCGGATATGTGATGGGCTCA…	Anopheles barbirostris isolate D2_103A 28S ribosomal RNA gene, partial sequence

## Sheet: COI-Krol_shared_with_D2
These are the available GenBank accessions that contain both the forward and reverse primers used by Krol et al. 2019 to amplify CO1. They have been trimmed to include only those species that are shared with the analogous dataset for D2 (herein).
GenBank Accession	length of the original sequence	taxonomic rank	taxid	scientific name	taxid of the genus	genus	taxid of the family	family	taxid of the super kingdom	super kingdom	strand (direct or reverse)	target sequence of the first primer	number of mismatches for the first primer	target sequence of the second primer	number of mismatches for the second primer	length of the amplified fragment (excluding primers)	sequence	definition
HQ561035	575	species	569589	Ochlerotatus vigilax	190765	Ochlerotatus	7157	Culicidae	2759	Eukaryota	D	GGGTCTGGGACAGGATGAAC	0	GATCACACAAATAATGGTAATCGGTC	3	154	agtagaaaatgggtctgggacaggatgaacAGTTTATCCACCTTTGTCATCTGGAACTGCCCATGCAGGAGCTTCAGTAGATTTAACAATTTTTTCTTTACATTTAGCCGGAATTTCATCAATTTTAGGAGCTGTAAATTTTATTACTACTGTAATTAATATACGATCTGCTGGAATTACTTTAgaccgattaccattatttgtgtgatctgttgtaatt	Ochlerotatus vigilax voucher gvc13773-1L cytochrome oxidase subunit 1 (COI) gene, partial cds; mitochondrial
HQ561024	630	species	569589	Ochlerotatus vigilax	190765	Ochlerotatus	7157	Culicidae	2759	Eukaryota	D	GGGTCTGGGACAGGATGAAC	0	GATCACACAAATAATGGTAATCGGTC	3	154	agtagaaaatgggtctgggacaggatgaacAGTTTATCCACCTTTGTCATCTGGAACTGCCCATGCAGGAGCTTCAGTAGATTTAACAATTTTTTCTTTACATTTAGCCGGAATTTCATCAATTTTAGGAGCTGTAAATTTTATTACTACTGTAATTAATATACGATCTGCTGGAATTACTTTAgaccgattaccattatttgtgtgatctgttgtaatt	Ochlerotatus vigilax voucher gvc13706-1L cytochrome oxidase subunit 1 (COI) gene, partial cds; mitochondrial
HM909613	658	species	569589	Ochlerotatus vigilax	190765	Ochlerotatus	7157	Culicidae	2759	Eukaryota	D	GGGTCTGGGACAGGATGAAC	0	GATCACACAAATAATGGTAATCGGTC	3	154	agtagaaaatgggtctgggacaggatgaacAGTTTATCCACCTTTGTCATCTGGAACTGCCCATGCAGGAGCTTCAGTAGATTTAACAATTTTTTCTTTACATTTAGCCGGAATTTCATCAATTTTAGGAGCTGTAAATTTTATTACTACTGTAATTAATATACGATCTGCTGGAATTACTTTAgaccgattaccattatttgtgtgatctgttgtaatt	Ochlerotatus vigilax voucher gvc13488-1L cytochrome oxidase subunit 1 (COI) gene, partial cds; mitochondrial
HM399357	658	species	7159	Aedes aegypti	7158	Aedes	7157	Culicidae	2759	Eukaryota	D	GGGGCAGGAACTGGGTGAAC	0	GATCAAACAAATAAAGGTAGTCGGTC	2	154	agtagaaaatggggcaggaactgggtgaacAGTTTATCCTCCTCTCTCTTCAGGAACAGCTCATGCTGGAGCTTCTGTTGATTTAGCTATTTTTTCTCTTCATTTAGCTGGAATTTCCTCAATTTTAGGGGCAGTAAATTTTATTACAACTGTAATTAATATACGATCGTCAGGAATTACTTTAgaccgactacctttatttgtttgatctgtagttatt	Aedes aegypti voucher gvc13372-1L cytochrome oxidase subunit 1 (COI) gene, partial cds; mitochondrial
HM862156	658	species	329100	Ochlerotatus abserratus	190765	Ochlerotatus	7157	Culicidae	2759	Eukaryota	D	GGGTCAGGGACAGGTTGAAC	0	GATCATACAAATAAAGGTAATCGATC	0	154	ggttgaaaatgggtcagggacaggttgaacGGTGTACCCACCTCTTTCTTCTGGAACTGCCCATGCAGGAGCTTCAGTTGATTTAACAATTTTTTCTCTTCATTTAGCGGGGATCTCTTCAATTTTAGGAGCAGTAAATTTTATTACTACTGTTATTAATATGCGATCTTCAGGGATTACATTAgatcgattacctttatttgtatgatccgttgtaatt	Ochlerotatus abserratus voucher BIOUG<CAN>:09PROBE-JW1051 cytochrome oxidase subunit 1 (COI) gene, partial cds; mitochondrial
HQ569474	658	species	329103	Ochlerotatus excrucians	190765	Ochlerotatus	7157	Culicidae	2759	Eukaryota	D	GGATCAGGGACAGGATGAAC	0	GATCACACAAATAAGGGTAATCGGTC	3	154	agtcgaaaatggatcagggacaggatgaacTGTATATCCACCACTTTCATCAGGAACTGCTCATGCTGGAGCCTCAGTAGATTTAACAATTTTCTCTCTTCATTTAGCTGGTGTATCCTCAATTTTAGGGGCAGTAAATTTCATTACTACTGTTATTAATATACGATCTGCAGGAATTACTTTAgaccgattacccttatttgtgtgatctgttgtaatt	Ochlerotatus excrucians voucher BIOUG<CAN>:07PROBE-JW0321 cytochrome oxidase subunit 1 (COI) gene, partial cds; mitochondrial
HQ569473	658	species	329103	Ochlerotatus excrucians	190765	Ochlerotatus	7157	Culicidae	2759	Eukaryota	D	GGATCAGGGACAGGATGAAC	0	GATCACACAAATAAGGGTAATCGGTC	3	154	agtcgaaaatggatcagggacaggatgaacTGTATATCCACCACTTTCATCAGGAACTGCTCATGCTGGAGCCTCAGTAGATTTAACAATTTTCTCTCTTCATTTAGCTGGTGTATCCTCAATTTTAGGGGCAGTAAATTTCATTACTACTGTTATTAATATACGATCTGCAGGAATTACTTTAgaccgattacccttatttgtgtgatctgttgtaatt	Ochlerotatus excrucians voucher BIOUG<CAN>:07PROBE-JW0320 cytochrome oxidase subunit 1 (COI) gene, partial cds; mitochondrial
HQ569470	658	species	329103	Ochlerotatus excrucians	190765	Ochlerotatus	7157	Culicidae	2759	Eukaryota	D	GGATCAGGGACAGGATGAAC	0	GATCACACAAATAAGGGTAATCGGTC	3	154	agtcgaaaatggatcagggacaggatgaacTGTATATCCACCACTTTCATCAGGAACTGCTCATGCTGGAGCCTCAGTAGATTTAACAATTTTCTCTCTTCATTTAGCTGGTGTATCCTCAATTTTAGGGGCAGTAAATTTCATTACTACTGTTATTAATATACGATCTGCAGGAATTACTTTAgaccgattacccttatttgtgtgatctgttgtaatt	Ochlerotatus excrucians voucher BIOUG<CAN>:07PROBE-JW0316 cytochrome oxidase subunit 1 (COI) gene, partial cds; mitochondrial
HQ569469	658	species	329103	Ochlerotatus excrucians	190765	Ochlerotatus	7157	Culicidae	2759	Eukaryota	D	GGATCAGGGACAGGATGAAC	0	GATCACACAAATAAGGGTAATCGGTC	3	154	agtcgaaaatggatcagggacaggatgaacTGTATATCCACCACTTTCATCAGGAACTGCTCATGCTGGAGCCTCAGTAGATTTAACAATTTTCTCTCTTCATTTAGCTGGTGTATCCTCAATTTTAGGGGCAGTAAATTTCATTACTACTGTTATTAATATACGATCTGCAGGAATTACTTTAgaccgattacccttatttgtgtgatctgttgtaatt	Ochlerotatus excrucians voucher BIOUG<CAN>:07PROBE-JW0315 cytochrome oxidase subunit 1 (COI) gene, partial cds; mitochondrial
HQ569467	658	species	329100	Ochlerotatus abserratus	190765	Ochlerotatus	7157	Culicidae	2759	Eukaryota	D	GGGTCAGGGACAGGTTGAAC	0	GATCATACAAATAAAGGTAATCGATC	0	154	ggttgaaaatgggtcagggacaggttgaacGGTGTACCCACCTCTTTCTTCTGGAACTGCCCATGCAGGAGCTTCAGTTGATTTAACAATTTTTTCTCTTCATTTAGCGGGGATCTCTTCAATTTTAGGAGCAGTAAATTTTATTACTACTGTTATTAATATGCGATCTTCAGGGATTACATTAgatcgattacctttatttgtatgatccgttgtaatt	Ochlerotatus abserratus voucher BIOUG<CAN>:07PROBE-JW0313 cytochrome oxidase subunit 1 (COI) gene, partial cds; mitochondrial
HQ569464	658	species	329103	Ochlerotatus excrucians	190765	Ochlerotatus	7157	Culicidae	2759	Eukaryota	D	GGGTCAGGGACAGGATGAAC	0	GATCACACAAATAAGGGTAATCGGTC	3	154	agtcgaaaatgggtcagggacaggatgaacTGTATATCCACCACTTTCATCAGGAACTGCTCATGCTGGAGCCTCAGTAGATTTAACAATTTTCTCTCTTCATTTAGCTGGTGTATCCTCAATTTTAGGGGCAGTAAATTTCATTACTACTGTTATTAATATACGATCTGCAGGAATTACTTTAgaccgattacccttatttgtgtgatctgttgtaatt	Ochlerotatus excrucians voucher BIOUG<CAN>:07PROBE-JW0309 cytochrome oxidase subunit 1 (COI) gene, partial cds; mitochondrial
HQ569462	658	species	329100	Ochlerotatus abserratus	190765	Ochlerotatus	7157	Culicidae	2759	Eukaryota	D	GGGTCAGGGACAGGTTGAAC	0	GATCATACAAATAAAGGTAATCGATC	0	154	ggttgaaaatgggtcagggacaggttgaacGGTGTACCCACCTCTTTCTTCTGGAACTGCCCATGCAGGAGCTTCAGTTGATTTAACAATTTTTTCTCTTCATTTAGCGGGGATCTCTTCAATTTTAGGAGCAGTAAATTTTATTACTACTGTTATTAATATGCGATCTTCAGGGATTACATTAgatcgattacctttatttgtatgatccgttgtaatt	Ochlerotatus abserratus voucher BIOUG<CAN>:07PROBE-JW0307 cytochrome oxidase subunit 1 (COI) gene, partial cds; mitochondrial
HQ569461	658	species	329103	Ochlerotatus excrucians	190765	Ochlerotatus	7157	Culicidae	2759	Eukaryota	D	GGATCAGGGACAGGATGAAC	0	GATCACACAAATAAGGGTAATCGGTC	3	154	agtcgaaaatggatcagggacaggatgaacTGTATATCCACCACTTTCATCAGGAACTGCTCATGCTGGAGCCTCAGTAGATTTAACAATTTTCTCTCTTCATTTAGCTGGTGTATCCTCAATTTTAGGGGCAGTAAATTTCATTACTACTGTTATTAATATACGATCTGCAGGAATTACTTTAgaccgattacccttatttgtgtgatctgttgtaatt	Ochlerotatus excrucians voucher BIOUG<CAN>:07PROBE-JW0306 cytochrome oxidase subunit 1 (COI) gene, partial cds; mitochondrial
HQ569460	658	species	329103	Ochlerotatus excrucians	190765	Ochlerotatus	7157	Culicidae	2759	Eukaryota	D	GGGTCAGGGACAGGATGAAC	0	GATCACACAAATAAGGGTAATCGGTC	3	154	agtcgaaaatgggtcagggacaggatgaacTGTATATCCACCACTTTCATCAGGAACTGCTCATGCTGGAGCCTCAGTAGATTTAACAATTTTCTCTCTTCATTTAGCTGGTGTATCCTCAATTTTAGGGGCAGTAAATTTCATTACTACTGTTATTAATATACGATCTGCAGGAATTACTTTAgaccgattacccttatttgtgtgatctgttgtaatt	Ochlerotatus excrucians voucher BIOUG<CAN>:07PROBE-JW0305 cytochrome oxidase subunit 1 (COI) gene, partial cds; mitochondrial
HM862019	633	species	329100	Ochlerotatus abserratus	190765	Ochlerotatus	7157	Culicidae	2759	Eukaryota	D	GGGTCAGGGACAGGTTGAAC	0	GATCATACAAATAAAGGTAATCGATC	0	154	ggttgaaaatgggtcagggacaggttgaacGGTGTACCCACCTCTTTCTTCTGGAACTGCCCATGCAGGAGCTTCAGTTGATTTAACAATTTTTTCTCTTCATTTAGCGGGGATCTCTTCAATTTTAGGAGCAGTAAATTTTATTACTACTGTTATTAATATGCGATCTTCAGGGATTACATTAgatcgattacctttatttgtatgatccgttgtaatt	Ochlerotatus abserratus voucher BIOUG<CAN>:09PROBE-JW0903 cytochrome oxidase subunit 1 (COI) gene, partial cds; mitochondrial
HM861908	658	species	329103	Ochlerotatus excrucians	190765	Ochlerotatus	7157	Culicidae	2759	Eukaryota	D	GGATCAGGGACAGGATGAAC	0	GATCACACAAATAAGGGTAATCGGTC	3	154	agtcgaaaatggatcagggacaggatgaacTGTATATCCACCACTTTCATCAGGAACTGCTCATGCTGGAGCCTCAGTAGATTTAACAATTTTCTCTCTTCATTTAGCTGGTGTATCCTCAATTTTAGGGGCAGTAAATTTCATTACTACTGTTATTAATATACGATCTGCAGGAATTACTTTAgaccgattacccttatttgtgtgatctgttgtaatt	Ochlerotatus excrucians voucher BIOUG<CAN>:09PROBE-JW0776 cytochrome oxidase subunit 1 (COI) gene, partial cds; mitochondrial
HM861668	658	species	329100	Ochlerotatus abserratus	190765	Ochlerotatus	7157	Culicidae	2759	Eukaryota	D	GGGTCAGGGACAGGTTGAAC	0	GATCATACAAATAAAGGTAATCGATC	0	154	ggttgaaaatgggtcagggacaggttgaacGGTGTACCCACCTCTTTCTTCTGGAACTGCCCATGCAGGAGCTTCAGTTGATTTAACAATTTTTTCTCTTCATTTAGCGGGGATCTCTTCAATTTTAGGAGCAGTAAATTTTATTACTACTGTTATTAATATGCGATCTTCAGGGATTACATTAgatcgattacctttatttgtatgatccgttgtaatt	Ochlerotatus abserratus voucher BIOUG<CAN>:09PROBE-JW0473 cytochrome oxidase subunit 1 (COI) gene, partial cds; mitochondrial
HM861667	658	species	329100	Ochlerotatus abserratus	190765	Ochlerotatus	7157	Culicidae	2759	Eukaryota	D	GGGTCAGGGACAGGTTGAAC	0	GATCATACAAATAAAGGTAATCGATC	0	154	ggttgaaaatgggtcagggacaggttgaacGGTGTACCCACCTCTTTCTTCTGGAACTGCCCATGCAGGAGCTTCAGTTGATTTAACAATTTTTTCTCTTCATTTAGCGGGGATCTCTTCAATTTTAGGAGCAGTAAATTTTATTACTACTGTTATTAATATGCGATCTTCAGGGATTACATTAgatcgattacctttatttgtatgatccgttgtaatt	Ochlerotatus abserratus voucher BIOUG<CAN>:09PROBE-JW0472 cytochrome oxidase subunit 1 (COI) gene, partial cds; mitochondrial
HM861665	658	species	329103	Ochlerotatus excrucians	190765	Ochlerotatus	7157	Culicidae	2759	Eukaryota	D	GGATCAGGGACAGGATGAAC	0	GATCACACAAATAAGGGTAATCGGTC	3	154	agtcgaaaatggatcagggacaggatgaacTGTATATCCACCACTTTCATCAGGAACTGCTCATGCTGGAGCCTCAGTAGATTTAACAATTTTCTCTCTTCATTTAGCTGGTGTATCCTCAATTTTAGGGGCAGTAAATTTCATTACTACTGTTATTAATATACGATCTGCAGGAATTACTTTAgaccgattacccttatttgtgtgatctgttgtaatt	Ochlerotatus excrucians voucher BIOUG<CAN>:09PROBE-JW0470 cytochrome oxidase subunit 1 (COI) gene, partial cds; mitochondrial
HM861483	658	species	329100	Ochlerotatus abserratus	190765	Ochlerotatus	7157	Culicidae	2759	Eukaryota	D	GGGTCAGGGACAGGTTGAAC	0	GATCATACAAATAAAGGTAATCGATC	0	154	ggttgaaaatgggtcagggacaggttgaacGGTGTACCCACCTCTTTCTTCTGGAACTGCCCATGCAGGAGCTTCAGTTGATTTAACAATTTTTTCTCTTCATTTAGCGGGGATCTCTTCAATTTTAGGAGCAGTAAATTTTATTACTACTGTTATTAATATGCGATCTTCAGGGATTACATTAgatcgattacctttatttgtatgatccgttgtaatt	Ochlerotatus abserratus voucher BIOUG<CAN>:09PROBE-JW0270 cytochrome oxidase subunit 1 (COI) gene, partial cds; mitochondrial
HM861482	658	species	329100	Ochlerotatus abserratus	190765	Ochlerotatus	7157	Culicidae	2759	Eukaryota	D	GGGTCAGGGACAGGTTGAAC	0	GATCATACAAATAAAGGTAATCGATC	0	154	ggttgaaaatgggtcagggacaggttgaacGGTGTACCCACCTCTTTCTTCTGGAACTGCCCATGCAGGAGCTTCAGTTGATTTAACAATTTTTTCTCTTCATTTAGCGGGGATCTCTTCAATTTTAGGAGCAGTAAATTTTATTACTACTGTTATTAATATGCGATCTTCAGGGATTACATTAgatcgattacctttatttgtatgatccgttgtaatt	Ochlerotatus abserratus voucher BIOUG<CAN>:09PROBE-JW0269 cytochrome oxidase subunit 1 (COI) gene, partial cds; mitochondrial
HM861441	658	species	329103	Ochlerotatus excrucians	190765	Ochlerotatus	7157	Culicidae	2759	Eukaryota	D	GGATCAGGGACAGGATGAAC	0	GATCACACAAATAAGGGTAATCGGTC	3	154	agtcgaaaatggatcagggacaggatgaacTGTATATCCACCACTTTCATCAGGAACTGCTCATGCTGGAGCCTCAGTAGATTTAACAATTTTCTCTCTTCATTTAGCTGGTGTATCCTCAATTTTAGGGGCAGTAAATTTCATTACTACTGTTATTAATATACGATCTGCAGGAATTACTTTAgaccgattacccttatttgtgtgatctgttgtaatt	Ochlerotatus excrucians voucher BIOUG<CAN>:09PROBE-JW0227 cytochrome oxidase subunit 1 (COI) gene, partial cds; mitochondrial
HM861419	658	species	329100	Ochlerotatus abserratus	190765	Ochlerotatus	7157	Culicidae	2759	Eukaryota	D	GGGTCAGGGACAGGTTGAAC	0	GATCATACAAATAAAGGTAATCGATC	0	154	ggttgaaaatgggtcagggacaggttgaacGGTGTACCCACCTCTTTCTTCTGGAACTGCCCATGCAGGAGCTTCAGTTGATTTAACAATTTTTTCTCTTCATTTAGCGGGGATCTCTTCAATTTTAGGAGCAGTAAATTTTATTACTACTGTTATTAATATGCGATCTTCAGGGATTACATTAgatcgattacctttatttgtatgatccgttgtaatt	Ochlerotatus abserratus voucher BIOUG<CAN>:09PROBE-JW0204 cytochrome oxidase subunit 1 (COI) gene, partial cds; mitochondrial
HM861416	658	species	329103	Ochlerotatus excrucians	190765	Ochlerotatus	7157	Culicidae	2759	Eukaryota	D	GGATCAGGGACAGGATGAAC	0	GATCACACAAATAAGGGTAACCGGTC	4	154	agtcgaaaatggatcagggacaggatgaacTGTATATCCACCACTTTCATCAGGAACTGCTCATGCTGGAGCCTCAGTAGATTTAACAATTTTCTCTCTTCATTTAGCTGGTGTATCCTCAATTTTAGGGGCAGTAAATTTCATTACTACTGTTATTAATATACGATCTGCAGGAATTACTTTAgaccggttacccttatttgtgtgatctgttgtaatt	Ochlerotatus excrucians voucher BIOUG<CAN>:09PROBE-JW0201 cytochrome oxidase subunit 1 (COI) gene, partial cds; mitochondrial
HM861395	658	species	329100	Ochlerotatus abserratus	190765	Ochlerotatus	7157	Culicidae	2759	Eukaryota	D	GGGTCAGGGACAGGTTGAAC	0	GATCATACAAATAAAGGTAATCGATC	0	154	ggttgaaaatgggtcagggacaggttgaacGGTGTACCCACCTCTTTCTTCTGGAACTGCCCATGCAGGAGCTTCAGTTGATTTAACAATTTTTTCTCTTCATTTAGCGGGGATCTCTTCAATTTTAGGAGCAGTAAATTTTATTACTACTGTTATTAATATGCGATCTTCAGGGATTACATTAgatcgattacctttatttgtatgatccgttataatt	Ochlerotatus abserratus voucher BIOUG<CAN>:09PROBE-JW0180 cytochrome oxidase subunit 1 (COI) gene, partial cds; mitochondrial
HM861119	658	species	329103	Ochlerotatus excrucians	190765	Ochlerotatus	7157	Culicidae	2759	Eukaryota	D	GGATCAGGGACAGGATGAAC	0	GATCACACAAATAAGGGTAATCGGTC	3	154	agtcgaaaatggatcagggacaggatgaacTGTATATCCACCACTTTCATCAGGAACTGCTCATGCTGGAGCCTCAGTAGATTTAACAATTTTCTCTCTTCATTTAGCTGGTGTATCCTCAATTTTAGGGGCAGTAAATTTCATTACTACTGTTATTAATATACGATCTGCAGGAATTACTTTAgaccgattacccttatttgtgtgatctgttgtaatt	Ochlerotatus excrucians voucher BIOUG<CAN>:07PROBE-JW1105 cytochrome oxidase subunit 1 (COI) gene, partial cds; mitochondrial
HM861117	658	species	329103	Ochlerotatus excrucians	190765	Ochlerotatus	7157	Culicidae	2759	Eukaryota	D	GGATCAGGGACAGGATGAAC	0	GATCACACAAATAAGGGTAATCGGTC	3	154	agtcgaaaatggatcagggacaggatgaacTGTATATCCACCACTTTCATCAGGAACTGCTCATGCTGGAGCCTCAGTAGATTTAACAATTTTCTCTCTTCATTTAGCTGGTGTATCCTCAATTTTAGGGGCAGTAAATTTCATTACTACTGTTATTAATATACGATCTGCAGGAATTACTTTAgaccgattacccttatttgtgtgatctgttgtaatt	Ochlerotatus excrucians voucher BIOUG<CAN>:07PROBE-JW1103 cytochrome oxidase subunit 1 (COI) gene, partial cds; mitochondrial
HM861116	658	species	329103	Ochlerotatus excrucians	190765	Ochlerotatus	7157	Culicidae	2759	Eukaryota	D	GGATCAGGGACAGGATGAAC	0	GATCACACAAATAAGGGTAATCGGTC	3	154	agtcgaaaatggatcagggacaggatgaacTGTATACCCACCACTTTCATCAGGAACTGCCCATGCTGGAGCCTCAGTAGATTTAACAATTTTCTCTCTTCATTTAGCTGGTGTATCTTCAATTTTAGGGGCAGTAAATTTCATTACTACTGTTATTAATATGCGATCTGCAGGAATTACTTTAgaccgattacccttatttgtgtgatctgttgtaatt	Ochlerotatus excrucians voucher BIOUG<CAN>:07PROBE-JW1102 cytochrome oxidase subunit 1 (COI) gene, partial cds; mitochondrial
HM861113	658	species	329103	Ochlerotatus excrucians	190765	Ochlerotatus	7157	Culicidae	2759	Eukaryota	D	GGATCAGGGACAGGATGAAC	0	GATCATACAAATAAGGGTAATCGGTC	2	154	agtcgaaaatggatcagggacaggatgaacTGTATATCCACCACTTTCATCAGGAACTGCTCATGCTGGAGCCTCAGTAGATTTAACAATTTTCTCTCTTCATTTAGCTGGTGTATCCTCAATTTTAGGAGCAGTAAATTTCATTACTACTGTTATTAATATACGATCTGCAGGAATTACTTTAgaccgattacccttatttgtatgatctgttgtaatt	Ochlerotatus excrucians voucher BIOUG<CAN>:07PROBE-JW1099 cytochrome oxidase subunit 1 (COI) gene, partial cds; mitochondrial
HM861110	658	species	329100	Ochlerotatus abserratus	190765	Ochlerotatus	7157	Culicidae	2759	Eukaryota	D	GGGTCAGGGACAGGTTGAAC	0	GATCATACAAATAAAGGTAATCGATC	0	154	ggttgaaaatgggtcagggacaggttgaacGGTGTACCCACCTCTTTCTTCTGGAACTGCCCATGCAGGAGCTTCAGTTGATTTAACAATTTTTTCTCTTCATTTAGCGGGGATCTCTTCAATTTTAGGAGCAGTAAATTTTATTACTACTGTTATTAATATGCGATCTTCAGGGATTACATTAgatcgattacctttatttgtatgatccgttgtaatt	Ochlerotatus abserratus voucher BIOUG<CAN>:07PROBE-JW1096 cytochrome oxidase subunit 1 (COI) gene, partial cds; mitochondrial
GU680424	653	species	329103	Ochlerotatus excrucians	190765	Ochlerotatus	7157	Culicidae	2759	Eukaryota	D	GGATCAGGGACAGGATGAAC	0	GATCACACAAATAAGGGTAATCGGTC	3	154	agtcgaaaatggatcagggacaggatgaacTGTATATCCACCACTTTCATCAGGAACTGCTCATGCTGGAGCCTCAGTAGATTTAACAATTTTCTCTCTTCATTTAGCTGGTGTATCCTCAATTTTAGGGGCAGTAAATTTCATTACTACTGTTATTAATATACGATCTGCAGGAATTACTTTAgaccgattacccttatttgtgtgatctgttgtaatt	Ochlerotatus excrucians voucher BIOUG<CAN>:09PROBE-02835 cytochrome oxidase subunit 1 (COI) gene, partial cds; mitochondrial
GU680392	658	species	329103	Ochlerotatus excrucians	190765	Ochlerotatus	7157	Culicidae	2759	Eukaryota	D	GGATCAGGGACAGGATGAAC	0	GATCATACAAATAAGGGTAATCGGTC	2	154	agtcgaaaatggatcagggacaggatgaacTGTATATCCACCACTTTCATCAGGAACTGCTCATGCTGGAGCCTCAGTAGATTTAACAATTTTCTCTCTTCATTTAGCTGGTGTATCCTCAATTTTAGGAGCAGTAAATTTCATTACTACTGTTATTAATATACGATCTGCAGGAATTACTTTAgaccgattacccttatttgtatgatctgttgtaatt	Ochlerotatus excrucians voucher BIOUG<CAN>:09PROBE-02802 cytochrome oxidase subunit 1 (COI) gene, partial cds; mitochondrial
GU680391	658	species	329103	Ochlerotatus excrucians	190765	Ochlerotatus	7157	Culicidae	2759	Eukaryota	D	GGATCAGGGACAGGATGAAC	0	GATCATACAAATAAGGGTAATCGGTC	2	154	agtcgaaaatggatcagggacaggatgaacTGTATATCCACCACTTTCATCAGGAACTGCTCATGCTGGAGCCTCAGTAGATTTAACAATTTTCTCTCTTCATTTAGCTGGTGTATCCTCAATTTTAGGAGCAGTAAATTTCATTACTACTGTTATTAATATACGATCTGCAGGAATTACTTTAgaccgattacccttatttgtatgatctgttgtaatt	Ochlerotatus excrucians voucher BIOUG<CAN>:09PROBE-02801 cytochrome oxidase subunit 1 (COI) gene, partial cds; mitochondrial
GU680390	658	species	329103	Ochlerotatus excrucians	190765	Ochlerotatus	7157	Culicidae	2759	Eukaryota	D	GGATCAGGGACAGGATGAAC	0	GATCATACAAATAAGGGTAATCGGTC	2	154	agtcgaaaatggatcagggacaggatgaacTGTATATCCACCACTTTCATCAGGAACTGCTCATGCTGGAGCCTCAGTAGATTTAACAATTTTCTCTCTTCATTTAGCTGGTGTATCCTCAATTTTAGGAGCAGTAAATTTCATTACTACTGTTATTAATATACGATCTGCAGGAATTACTTTAgaccgattacccttatttgtatgatctgttgtaatt	Ochlerotatus excrucians voucher BIOUG<CAN>:09PROBE-02804 cytochrome oxidase subunit 1 (COI) gene, partial cds; mitochondrial
GU680389	658	species	329103	Ochlerotatus excrucians	190765	Ochlerotatus	7157	Culicidae	2759	Eukaryota	D	GGATCAGGGACAGGATGAAC	0	GATCATACAAATAAGGGTAATCGGTC	2	154	agtcgaaaatggatcagggacaggatgaacTGTATATCCACCACTTTCATCAGGAACTGCTCATGCTGGAGCCTCAGTAGATTTAACAATTTTCTCTCTTCATTTAGCTGGTGTATCCTCAATTTTAGGAGCAGTAAATTTCATTACTACTGTTATTAATATACGATCTGCAGGAATTACTTTAgaccgattacccttatttgtatgatctgttgtaatt	Ochlerotatus excrucians voucher BIOUG<CAN>:09PROBE-02803 cytochrome oxidase subunit 1 (COI) gene, partial cds; mitochondrial
GU680388	658	species	329103	Ochlerotatus excrucians	190765	Ochlerotatus	7157	Culicidae	2759	Eukaryota	D	GGATCAGGGACAGGATGAAC	0	GATCATACAAATAAGGGTAATCGGTC	2	154	agtcgaaaatggatcagggacaggatgaacTGTATATCCACCACTTTCATCAGGAACTGCTCATGCTGGAGCCTCAGTAGATTTAACAATTTTCTCTCTTCATTTAGCTGGTGTATCCTCAATTTTAGGAGCAGTAAATTTCATTACTACTGTTATTAATATACGATCTGCAGGAATTACTTTAgaccgattacccttatttgtatgatctgttgtaatt	Ochlerotatus excrucians voucher BIOUG<CAN>:09PROBE-02817 cytochrome oxidase subunit 1 (COI) gene, partial cds; mitochondrial
GU680387	656	species	329103	Ochlerotatus excrucians	190765	Ochlerotatus	7157	Culicidae	2759	Eukaryota	D	GGATCAGGGACAGGATGAAC	0	GATCATACAAATAAGGGTAATCGGTC	2	154	agtcgaaaatggatcagggacaggatgaacTGTATATCCACCACTTTCATCAGGAACTGCTCATGCTGGAGCCTCAGTAGATTTAACAATTTTCTCTCTTCATTTAGCTGGTGTATCCTCAATTTTAGGAGCAGTAAATTTCATTACTACTGTTATTAATATACGATCTGCAGGAATTACTTTAgaccgattacccttatttgtatgatctgttgtaatt	Ochlerotatus excrucians voucher BIOUG<CAN>:09PROBE-02830 cytochrome oxidase subunit 1 (COI) gene, partial cds; mitochondrial
GU680386	653	species	329103	Ochlerotatus excrucians	190765	Ochlerotatus	7157	Culicidae	2759	Eukaryota	D	GGATCAGGGACAGGATGAAC	0	GATCATACAAATAAGGGTAATCGGTC	2	154	agtcgaaaatggatcagggacaggatgaacTGTATATCCACCACTTTCATCAGGAACTGCTCATGCTGGAGCCTCAGTAGATTTAACAATTTTCTCTCTTCATTTAGCTGGTGTATCCTCAATTTTAGGAGCAGTAAATTTCATTACTACTGTTATTAATATACGATCTGCAGGAATTACTTTAgaccgattacccttatttgtatgatctgttgtaatt	Ochlerotatus excrucians voucher BIOUG<CAN>:09PROBE-02831 cytochrome oxidase subunit 1 (COI) gene, partial cds; mitochondrial
GU680385	658	species	329103	Ochlerotatus excrucians	190765	Ochlerotatus	7157	Culicidae	2759	Eukaryota	D	GGATCAGGGACAGGATGAAC	0	GATCATACAAATAAGGGTAATCGGTC	2	154	agtcgaaaatggatcagggacaggatgaacTGTATATCCACCACTTTCATCAGGAACTGCTCATGCTGGAGCCTCAGTAGATTTAACAATTTTCTCTCTTCATTTAGCTGGTGTATCCTCAATTTTAGGAGCAGTAAATTTCATTACTACTGTTATTAATATACGATCTGCAGGAATTACTTTAgaccgattacccttatttgtatgatctgttgtaatt	Ochlerotatus excrucians voucher BIOUG<CAN>:09PROBE-02826 cytochrome oxidase subunit 1 (COI) gene, partial cds; mitochondrial
GU680384	650	species	329103	Ochlerotatus excrucians	190765	Ochlerotatus	7157	Culicidae	2759	Eukaryota	D	GGGTCAGGGACAGGATGAAC	0	GATCACACAAATAAGGGTAATCGGTC	3	154	agtcgaaaatgggtcagggacaggatgaacTGTATATCCACCACTTTCATCAGGAACTGCTCATGCTGGAGCCTCAGTAGATTTAACAATTTTCTCTCTTCATTTAGCTGGTGTATCCTCAATTTTAGGGGCAGTAAATTTCATTACTACTGTTATTAATATACGATCTGCAGGAATTACTTTAgaccgattacccttatttgtgtgatctgttgtaatt	Ochlerotatus excrucians voucher BIOUG<CAN>:09PROBE-02808 cytochrome oxidase subunit 1 (COI) gene, partial cds; mitochondrial
GU680383	658	species	329103	Ochlerotatus excrucians	190765	Ochlerotatus	7157	Culicidae	2759	Eukaryota	D	GGATCAGGGACAGGATGAAC	0	GATCATACAAATAAGGGTAATCGGTC	2	154	agtcgaaaatggatcagggacaggatgaacTGTATATCCACCACTTTCATCAGGAACTGCTCATGCTGGAGCCTCAGTAGATTTAACAATTTTCTCTCTTCATTTAGCTGGTGTATCCTCAATTTTAGGAGCAGTAAATTTCATTACTACTGTTATTAATATACGATCTGCAGGAATTACTTTAgaccgattacccttatttgtatgatctgttgtaatt	Ochlerotatus excrucians voucher BIOUG<CAN>:09PROBE-02868 cytochrome oxidase subunit 1 (COI) gene, partial cds; mitochondrial
GU680382	645	species	329103	Ochlerotatus excrucians	190765	Ochlerotatus	7157	Culicidae	2759	Eukaryota	D	GGGTCAGGGACAGGATGAAC	0	GATCACACAAATAAGGGTAATCGGTC	3	154	agtcgaaaatgggtcagggacaggatgaacTGTATATCCACCACTTTCATCAGGAACTGCTCATGCTGGAGCCTCAGTAGATTTAACAATTTTCTCTCTTCATTTAGCTGGTGTATCCTCAATTTTAGGGGCAGTAAATTTCATTACTACTGTTATTAATATACGATCTGCAGGAATTACTTTAgaccgattacccttatttgtgtgatctgttgtaatt	Ochlerotatus excrucians voucher BIOUG<CAN>:09PROBE-02807 cytochrome oxidase subunit 1 (COI) gene, partial cds; mitochondrial
GU680381	653	species	329103	Ochlerotatus excrucians	190765	Ochlerotatus	7157	Culicidae	2759	Eukaryota	D	GGGTCAGGGACAGGATGAAC	0	GATCACACAAATAAGGGTAATCGGTC	3	154	agtcgaaaatgggtcagggacaggatgaacTGTATATCCACCACTTTCATCAGGAACTGCTCATGCTGGAGCCTCAGTAGATTTAACAATTTTCTCTCTTCATTTAGCTGGTGTATCCTCAATTTTAGGGGCAGTAAATTTCATTACTACTGTTATTAATATACGATCTGCAGGAATTACTTTAgaccgattacccttatttgtgtgatctgttgtaatt	Ochlerotatus excrucians voucher BIOUG<CAN>:09PROBE-02865 cytochrome oxidase subunit 1 (COI) gene, partial cds; mitochondrial
GU680380	653	species	329103	Ochlerotatus excrucians	190765	Ochlerotatus	7157	Culicidae	2759	Eukaryota	D	GGATCAGGGACAGGATGAAC	0	GATCATACAAATAAGGGTAATCGATC	1	154	agtcgaaaatggatcagggacaggatgaacTGTATATCCACCACTTTCATCAGGAACTGCTCATGCTGGAGCCTCAGTAGATTTAACAATTTTCTCTCTTCATTTAGCTGGTGTATCCTCAATTTTAGGGGCAGTAAATTTCATTACTACTGTTATTAATATACGATCTGCAGGAATTACTTTAgatcgattacccttatttgtatgatctgttgtaatt	Ochlerotatus excrucians voucher BIOUG<CAN>:09PROBE-02821 cytochrome oxidase subunit 1 (COI) gene, partial cds; mitochondrial
GU680379	653	species	329103	Ochlerotatus excrucians	190765	Ochlerotatus	7157	Culicidae	2759	Eukaryota	D	GGATCAGGGACAGGATGAAC	0	GATCACACAAATAAGGGTAATCGGTC	3	154	agtcgaaaatggatcagggacaggatgaacTGTATATCCACCACTTTCATCAGGAACTGCTCATGCTGGAGCCTCAGTAGATTTAACAATTTTCTCTCTTCATTTAGCTGGTGTATCCTCAATTTTAGGGGCAGTAAATTTTATTACTACTGTTATTAATATACGATCTGCAGGAATTACTTTAgaccgattacccttatttgtgtgatctgttgtaatt	Ochlerotatus excrucians voucher BIOUG<CAN>:09PROBE-02857 cytochrome oxidase subunit 1 (COI) gene, partial cds; mitochondrial
GU680378	654	species	329103	Ochlerotatus excrucians	190765	Ochlerotatus	7157	Culicidae	2759	Eukaryota	D	GGATCAGGGACAGGATGAAC	0	GATCACACAAATAAGGGTAACCGGTC	4	154	agtcgaaaatggatcagggacaggatgaacTGTATATCCACCACTTTCATCAGGAACTGCTCATGCTGGAGCCTCAGTAGATTTAACAATTTTCTCTCTTCATTTAGCTGGTGTATCCTCAATTTTAGGGGCAGTAAATTTCATTACTACTGTTATTAATATACGATCTGCAGGAATTACTTTAgaccggttacccttatttgtgtgatctgttgtaatt	Ochlerotatus excrucians voucher BIOUG<CAN>:09PROBE-02863 cytochrome oxidase subunit 1 (COI) gene, partial cds; mitochondrial
GU680377	658	species	329103	Ochlerotatus excrucians	190765	Ochlerotatus	7157	Culicidae	2759	Eukaryota	D	GGGTCAGGGACAGGATGAAC	0	GATCACACAAATAAGGGTAATCGGTC	3	154	agtcgaaaatgggtcagggacaggatgaacTGTATATCCACCACTTTCATCAGGAACTGCTCATGCTGGAGCCTCAGTAGATTTAACAATTTTCTCTCTTCATTTAGCTGGTGTATCCTCAATTTTAGGAGCAGTAAATTTCATTACTACTGTTATTAATATACGATCTGCAGGAATTACTTTAgaccgattacccttatttgtgtgatctgttgtaatt	Ochlerotatus excrucians voucher BIOUG<CAN>:09PROBE-02832 cytochrome oxidase subunit 1 (COI) gene, partial cds; mitochondrial
GU680376	654	species	329103	Ochlerotatus excrucians	190765	Ochlerotatus	7157	Culicidae	2759	Eukaryota	D	GGATCAGGGACAGGATGAAC	0	GATCACACAAATAAGGGTAATCGGTC	3	154	agtcgaaaatggatcagggacaggatgaacTGTATATCCACCACTTTCATCAGGAACTGCTCATGCTGGAGCCTCAGTAGATTTAACAATTTTCTCTCTTCATTTAGCTGGTGTATCCTCAATTTTAGGGGCAGTAAATTTCATTACTACTGTTATTAATATACGATCTGCAGGAATTACTTTAgaccgattacccttatttgtgtgatctgttgtaatt	Ochlerotatus excrucians voucher BIOUG<CAN>:09PROBE-02805 cytochrome oxidase subunit 1 (COI) gene, partial cds; mitochondrial
GU680375	658	species	329103	Ochlerotatus excrucians	190765	Ochlerotatus	7157	Culicidae	2759	Eukaryota	D	GGATCAGGGACAGGATGAAC	0	GATCACACAAATAAGGGTAATCGGTC	3	154	agtcgaaaatggatcagggacaggatgaacTGTATACCCACCACTTTCATCAGGAACTGCTCATGCTGGAGCCTCAGTAGATTTAACAATTTTCTCTCTTCATTTAGCTGGTGTATCCTCAATTTTAGGGGCAGTAAATTTCATTACTACTGTTATTAATATACGATCTGCAGGAATTACTTTAgaccgattacccttatttgtgtgatctgttgtaatt	Ochlerotatus excrucians voucher BIOUG<CAN>:09PROBE-02827 cytochrome oxidase subunit 1 (COI) gene, partial cds; mitochondrial
GU680374	653	species	329103	Ochlerotatus excrucians	190765	Ochlerotatus	7157	Culicidae	2759	Eukaryota	D	GGATCAGGGACAGGATGAAC	0	GATCACACAAATAAGGGTAATCGGTC	3	154	agtcgaaaatggatcagggacaggatgaacTGTATATCCACCACTTTCATCAGGAACTGCTCATGCTGGAGCCTCAGTAGATTTAACAATTTTCTCTCTTCATTTAGCTGGTGTATCCTCAATTTTAGGGGCAGTAAATTTCATTACTACTGTTATTAATATACGATCTGCAGGAATTACTTTAgaccgattacccttatttgtgtgatctgttgtaatt	Ochlerotatus excrucians voucher BIOUG<CAN>:09PROBE-02869 cytochrome oxidase subunit 1 (COI) gene, partial cds; mitochondrial
GU680373	658	species	329103	Ochlerotatus excrucians	190765	Ochlerotatus	7157	Culicidae	2759	Eukaryota	D	GGATCAGGGACAGGATGAAC	0	GATCACACAAATAAGGGTAATCGGTC	3	154	agtcgaaaatggatcagggacaggatgaacTGTATATCCACCACTTTCATCAGGAACTGCTCATGCTGGAGCCTCAGTAGATTTAACAATTTTCTCTCTTCATTTAGCTGGTGTATCCTCAATTTTAGGGGCAGTAAATTTCATTACTACTGTTATTAATATACGATCTGCAGGAATTACTTTAgaccgattacccttatttgtgtgatctgttgtaatt	Ochlerotatus excrucians voucher BIOUG<CAN>:09PROBE-02867 cytochrome oxidase subunit 1 (COI) gene, partial cds; mitochondrial
GU680372	658	species	329103	Ochlerotatus excrucians	190765	Ochlerotatus	7157	Culicidae	2759	Eukaryota	D	GGATCAGGGACAGGATGAAC	0	GATCACACAAATAAGGGTAATCGGTC	3	154	agtcgaaaatggatcagggacaggatgaacTGTATATCCACCACTTTCATCAGGAACTGCTCATGCTGGAGCCTCCGTAGATTTAACAATTTTCTCTCTTCATTTAGCTGGTGTATCCTCAATTTTAGGGGCAGTAAATTTCATTACTACTGTTATTAATATACGATCTGCAGGAATTACTTTAgaccgattacccttatttgtgtgatctgttgtaatt	Ochlerotatus excrucians voucher BIOUG<CAN>:09PROBE-02864 cytochrome oxidase subunit 1 (COI) gene, partial cds; mitochondrial
GU680371	653	species	329103	Ochlerotatus excrucians	190765	Ochlerotatus	7157	Culicidae	2759	Eukaryota	D	GGATCAGGGACAGGATGAAC	0	GATCACACAAATAAGGGTAATCGGTC	3	154	agtcgaaaatggatcagggacaggatgaacTGTATATCCACCACTTTCATCAGGAACTGCTCATGCTGGAGCCTCAGTAGATTTAACAATTTTCTCTCTTCATTTAGCTGGTGTATCCTCAATTTTAGGGGCAGTAAATTTCATTACTACTGTTATTAATATACGATCTGCAGGAATTACTTTAgaccgattacccttatttgtgtgatctgttgtaatt	Ochlerotatus excrucians voucher BIOUG<CAN>:09PROBE-02833 cytochrome oxidase subunit 1 (COI) gene, partial cds; mitochondrial
GU680370	658	species	329103	Ochlerotatus excrucians	190765	Ochlerotatus	7157	Culicidae	2759	Eukaryota	D	GGATCAGGGACAGGATGAAC	0	GATCACACAAATAAGGGTAATCGGTC	3	154	agtcgaaaatggatcagggacaggatgaacTGTATATCCACCACTTTCATCAGGAACTGCTCATGCTGGAGCCTCAGTAGATTTAACAATTTTCTCTCTTCATTTAGCTGGTGTATCCTCAATTTTAGGGGCAGTAAATTTCATTACTACTGTTATTAATATACGATCTGCAGGAATTACTTTAgaccgattacccttatttgtgtgatctgttgtaatt	Ochlerotatus excrucians voucher BIOUG<CAN>:09PROBE-02816 cytochrome oxidase subunit 1 (COI) gene, partial cds; mitochondrial
GU680369	653	species	329103	Ochlerotatus excrucians	190765	Ochlerotatus	7157	Culicidae	2759	Eukaryota	D	GGATCAGGGACAGGATGAAC	0	GATCACACAAATAAGGGTAATCGGTC	3	154	agtcgaaaatggatcagggacaggatgaacTGTATATCCACCACTTTCATCAGGAACTGCTCATGCTGGAGCCTCAGTAGATTTAACAATTTTCTCTCTTCATTTAGCTGGTGTATCCTCAATTTTAGGGGCAGTAAATTTCATTACTACTGTTATTAATATACGATCTGCAGGAATTACTTTAgaccgattacccttatttgtgtgatctgttgtaatt	Ochlerotatus excrucians voucher BIOUG<CAN>:09PROBE-02806 cytochrome oxidase subunit 1 (COI) gene, partial cds; mitochondrial
GU680368	653	species	329103	Ochlerotatus excrucians	190765	Ochlerotatus	7157	Culicidae	2759	Eukaryota	D	GGATCAGGGACAGGATGAAC	0	GATCACACAAATAAGGGTAATCGGTC	3	154	agtcgaaaatggatcagggacaggatgaacTGTATATCCACCACTTTCATCAGGAACTGCTCATGCTGGAGCCTCAGTAGATTTAACAATTTTCTCTCTTCATTTAGCTGGTGTATCCTCAATTTTAGGGGCAGTAAATTTCATTACTACTGTTATTAATATACGATCTGCAGGAATTACTTTAgaccgattacccttatttgtgtgatctgttgtaatt	Ochlerotatus excrucians voucher BIOUG<CAN>:09PROBE-02819 cytochrome oxidase subunit 1 (COI) gene, partial cds; mitochondrial
GU680367	653	species	329103	Ochlerotatus excrucians	190765	Ochlerotatus	7157	Culicidae	2759	Eukaryota	D	GGATCAGGGACAGGATGAAC	0	GATCACACAAATAAGGGTAATCGGTC	3	154	agtcgaaaatggatcagggacaggatgaacTGTATATCCACCACTTTCATCAGGAACTGCTCATGCTGGAGCCTCAGTAGATTTAACAATTTTCTCTCTTCATTTAGCTGGTGTATCCTCAATTTTAGGGGCAGTAAATTTCATTACTACTGTTATTAATATACGATCTGCAGGAATTACTTTAgaccgattacccttatttgtgtgatctgttgtaatt	Ochlerotatus excrucians voucher BIOUG<CAN>:09PROBE-02818 cytochrome oxidase subunit 1 (COI) gene, partial cds; mitochondrial
GU680366	658	species	329103	Ochlerotatus excrucians	190765	Ochlerotatus	7157	Culicidae	2759	Eukaryota	D	GGATCAGGGACAGGATGAAC	0	GATCACACAAATAAGGGTAATCGGTC	3	154	agtcgaaaatggatcagggacaggatgaacTGTATATCCACCACTTTCATCAGGAACTGCTCATGCTGGAGCCTCAGTAGATTTAACAATTTTCTCTCTTCATTTAGCTGGTGTATCCTCAATTTTAGGGGCAGTAAATTTCATTACTACTGTTATTAATATACGATCTGCAGGAATTACTTTAgaccgattacccttatttgtgtgatctgttgtaatt	Ochlerotatus excrucians voucher BIOUG<CAN>:09PROBE-02822 cytochrome oxidase subunit 1 (COI) gene, partial cds; mitochondrial
GU680365	658	species	329103	Ochlerotatus excrucians	190765	Ochlerotatus	7157	Culicidae	2759	Eukaryota	D	GGATCAGGGACAGGATGAAC	0	GATCACACAAATAAGGGTAATCGGTC	3	154	agtcgaaaatggatcagggacaggatgaacTGTATATCCACCACTTTCATCAGGAACTGCTCATGCTGGAGCCTCAGTAGATTTAACAATTTTCTCTCTTCATTTAGCTGGTGTATCCTCAATTTTAGGGGCAGTAAATTTCATTACTACTGTTATTAATATACGATCTGCAGGAATTACTTTAgaccgattacccttatttgtgtgatctgttgtaatt	Ochlerotatus excrucians voucher BIOUG<CAN>:09PROBE-02820 cytochrome oxidase subunit 1 (COI) gene, partial cds; mitochondrial
GU680364	653	species	329103	Ochlerotatus excrucians	190765	Ochlerotatus	7157	Culicidae	2759	Eukaryota	D	GGATCAGGGACAGGATGAAC	0	GATCACACAAATAAGGGTAATCGGTC	3	154	agtcgaaaatggatcagggacaggatgaacTGTATATCCACCACTTTCATCAGGAACTGCTCATGCTGGAGCCTCAGTAGATTTAACAATTTTCTCTCTTCATTTAGCTGGTGTATCCTCAATTTTAGGGGCAGTAAATTTCATTACTACTGTTATTAATATACGATCTGCAGGAATTACTTTAgaccgattacccttatttgtgtgatctgttgtaatt	Ochlerotatus excrucians voucher BIOUG<CAN>:09PROBE-02852 cytochrome oxidase subunit 1 (COI) gene, partial cds; mitochondrial
GU680363	658	species	329103	Ochlerotatus excrucians	190765	Ochlerotatus	7157	Culicidae	2759	Eukaryota	D	GGATCAGGGACAGGATGAAC	0	GATCACACAAATAAGGGTAATCGGTC	3	154	agtcgaaaatggatcagggacaggatgaacTGTATATCCACCACTTTCATCAGGAACTGCTCATGCTGGAGCCTCAGTAGATTTAACAATTTTCTCTCTTCATTTAGCTGGTGTATCCTCAATTTTAGGGGCAGTAAATTTCATTACTACTGTTATTAATATACGATCTGCAGGAATTACTTTAgaccgattacccttatttgtgtgatctgttgtaatt	Ochlerotatus excrucians voucher BIOUG<CAN>:09PROBE-02834 cytochrome oxidase subunit 1 (COI) gene, partial cds; mitochondrial
GU680362	658	species	329103	Ochlerotatus excrucians	190765	Ochlerotatus	7157	Culicidae	2759	Eukaryota	D	GGATCAGGGACAGGATGAAC	0	GATCACACAAATAAGGGTAATCGGTC	3	154	agtcgaaaatggatcagggacaggatgaacTGTATATCCACCACTTTCATCAGGAACTGCTCATGCTGGAGCCTCAGTAGATTTAACAATTTTCTCTCTTCATTTAGCTGGTGTATCCTCAATTTTAGGGGCAGTAAATTTCATTACTACTGTTATTAATATACGATCTGCAGGAATTACTTTAgaccgattacccttatttgtgtgatctgttgtaatt	Ochlerotatus excrucians voucher BIOUG<CAN>:09PROBE-02870 cytochrome oxidase subunit 1 (COI) gene, partial cds; mitochondrial
GU680361	658	species	329103	Ochlerotatus excrucians	190765	Ochlerotatus	7157	Culicidae	2759	Eukaryota	D	GGATCAGGGACAGGATGAAC	0	GATCACACAAATAAGGGTAATCGGTC	3	154	agtcgaaaatggatcagggacaggatgaacTGTATATCCACCACTTTCATCAGGAACTGCTCATGCTGGAGCCTCAGTAGATTTAACAATTTTCTCTCTTCATTTAGCTGGTGTATCCTCAATTTTAGGGGCAGTAAATTTCATTACTACTGTTATTAATATACGATCTGCAGGAATTACTTTAgaccgattacccttatttgtgtgatctgttgtaatt	Ochlerotatus excrucians voucher BIOUG<CAN>:09PROBE-02866 cytochrome oxidase subunit 1 (COI) gene, partial cds; mitochondrial
GU680360	658	species	329103	Ochlerotatus excrucians	190765	Ochlerotatus	7157	Culicidae	2759	Eukaryota	D	GGATCAGGGACAGGATGAAC	0	GATCACACAAATAAGGGTAATCGGTC	3	154	agtcgaaaatggatcagggacaggatgaacTGTATATCCACCACTTTCATCAGGAACTGCTCATGCTGGAGCCTCAGTAGATTTAACAATTTTCTCTCTTCATTTAGCTGGTGTATCCTCAATTTTAGGGGCAGTAAATTTCATTACTACTGTTATTAATATACGATCTGCAGGAATTACTTTAgaccgattacccttatttgtgtgatctgttgtaatt	Ochlerotatus excrucians voucher BIOUG<CAN>:09PROBE-02890 cytochrome oxidase subunit 1 (COI) gene, partial cds; mitochondrial
GU680359	652	species	329103	Ochlerotatus excrucians	190765	Ochlerotatus	7157	Culicidae	2759	Eukaryota	D	GGATCAGGGACAGGATGAAC	0	GATCACACAAATAAGGGTAATCGGTC	3	154	agtcgaaaatggatcagggacaggatgaacTGTATATCCACCACTTTCATCAGGAACTGCTCATGCTGGAGCCTCAGTAGATTTAACAATTTTCTCTCTTCATTTAGCTGGTGTATCCTCAATTTTAGGGGCAGTAAATTTCATTACTACTGTTATTAATATACGATCTGCAGGAATTACTTTAgaccgattacccttatttgtgtgatctgttgtaatt	Ochlerotatus excrucians voucher BIOUG<CAN>:09PROBE-02871 cytochrome oxidase subunit 1 (COI) gene, partial cds; mitochondrial
HM535300	594	species	120870	Ochlerotatus caspius	190765	Ochlerotatus	7157	Culicidae	2759	Eukaryota	D	GGATCAGGAACAGGATGAAC	0	GATCAAACAAATAAAGGTAATCGATC	0	154	agtagaaaatggatcaggaacaggatgaacAGTTTATCCACCTCTTTCATCTGGAACTGCTCATGCAGGAGCCTCAGTAGATTTAACAATTTTTTCTTTACATTTAGCAGGAGTATCATCAATTTTAGGAGCAGTAAATTTTATTACTACTGTTATTAATATACGATCAGCAGGAATTACATTAgatcgattacctttatttgtttgatctgttgtaatt	Ochlerotatus caspius haplotype 49 cytochrome oxidase subunit 1 gene, partial cds; mitochondrial
HM535299	594	species	120870	Ochlerotatus caspius	190765	Ochlerotatus	7157	Culicidae	2759	Eukaryota	D	GGGTCAGGAACAGGATGAAC	0	GATCAAACAAATAAAGGTAATCGATC	0	154	agtagaaaatgggtcaggaacaggatgaacAGTTTATCCACCTCTTTCATCTGGAACTGCTCATGCAGGAGCCTCAGTTGATTTAACAATTTTTTCTTTACATTTAGCAGGGGTATCATCAATTTTAGGAGCAGTAAATTTTATTACTACTGTTATTAATATACGATCAGCAGGAATTACATTAgatcgattacctttatttgtttgatctgttgtaatt	Ochlerotatus caspius haplotype 48 cytochrome oxidase subunit 1 gene, partial cds; mitochondrial
HM535298	594	species	120870	Ochlerotatus caspius	190765	Ochlerotatus	7157	Culicidae	2759	Eukaryota	D	GGGTCAGGAACAGGATGAAC	0	GATCAAACAAATAAAGGTAATCGATC	0	154	agtagaaaatgggtcaggaacaggatgaacAGTTTATCCACCTCTTTCATCTGGAACTGCTCATGCAGGAGCCTCAGTTGATTTAACAATTTTTTCTTTACATTTAGCAGGAGTATCATCAATTTTAGGAGCAGTAAATTTTATTACTACTGTTATTAATATACGATCAGCAGGAATTACATTAgatcgattacctttatttgtttgatctgttgtaatt	Ochlerotatus caspius haplotype 47 cytochrome oxidase subunit 1 gene, partial cds; mitochondrial
HM535297	594	species	120870	Ochlerotatus caspius	190765	Ochlerotatus	7157	Culicidae	2759	Eukaryota	D	GGGTCAGGAACAGGATGAAC	0	GATCAAACAAATAAAGGTAATCGATC	0	154	agtagaaaatgggtcaggaacaggatgaacAGTTTATCCACCTCTTTCATCTGGAACTGCTCATGCAGGAGCCTCAGTTGATTTAACAATTTTTTCTTTACACTTAGCAGGAGTATCATCAATTTTAGGAGCAGTAAATTTCATTACTACTGTTATTAATATACGATCAGCAGGAATTACATTAgatcgattacctttatttgtttgatctgttgtaatt	Ochlerotatus caspius haplotype 46 cytochrome oxidase subunit 1 gene, partial cds; mitochondrial
HM535296	594	species	120870	Ochlerotatus caspius	190765	Ochlerotatus	7157	Culicidae	2759	Eukaryota	D	GGGTCAGGAACAGGATGAAC	0	GATCAAACAAATAAAGGTAATCGATC	0	154	agtagaaaatgggtcaggaacaggatgaacAGTTTATCCACCTCTTTCATCTGGAACTGCTCATGCAGGAGCCTCAGTTGATTTAACAATTTTTTCTTTACATTTAGCAGGAGTATCATCAATTTTAGGAGCAGTAAATTTTATTACTACTGTTATTAATATGCGATCAGCAGGAATTACATTAgatcgattacctttatttgtttgatctgttgtaatt	Ochlerotatus caspius haplotype 45 cytochrome oxidase subunit 1 gene, partial cds; mitochondrial
HM535295	594	species	120870	Ochlerotatus caspius	190765	Ochlerotatus	7157	Culicidae	2759	Eukaryota	D	GGGTCAGGAACAGGATGAAC	0	GATCAAACAAATAAAGGTAATCGATC	0	154	agtagaaaatgggtcaggaacaggatgaacAGTTTATCCACCTCTTTCATCTGGAACTGCTCATGCAGGAGCCTCAGTTGATTTAACAATTTTTTCTTTACATTTAGCAGGAGTATCATCAATTTTAGGAGCAGTAAATTTTATTACTACTGTTATTAATATACGATCAGCAGGAATTACATTAgatcgattacctttatttgtttgatctgttgtaatt	Ochlerotatus caspius haplotype 44 cytochrome oxidase subunit 1 gene, partial cds; mitochondrial
HM535294	594	species	120870	Ochlerotatus caspius	190765	Ochlerotatus	7157	Culicidae	2759	Eukaryota	D	GGGTCAGGAACAGGATGAAC	0	GATCAAACAAATAAAGGTAATCGATC	0	154	agtagaaaacgggtcaggaacaggatgaacAGTTTATCCACCTCTTTCATCTGGAACTGCTCATGCAGGAGCCTCAGTTGATTTAACAATTTTTTCTTTACATTTAGCAGGAGTATCATCAATTTTAGGAGCAGTAAATTTTATTACTACTGTTATTAATATACGATCAGCAGGAATTACATTAgatcgattacctttatttgtttgatctgttgtaatt	Ochlerotatus caspius haplotype 43 cytochrome oxidase subunit 1 gene, partial cds; mitochondrial
HM535293	594	species	120870	Ochlerotatus caspius	190765	Ochlerotatus	7157	Culicidae	2759	Eukaryota	D	GGGTCAGGAACAGGATGAAC	0	GATCAAACAAATAAAGGTAATCGATC	0	154	agtagaaaatgggtcaggaacaggatgaacAGTTTATCCACCTCTTTCATCTGGAACTGCTCATGCAGGAGCCTCAGTTGATTTAACAATTTTTTCTTTACATTTAGCAGGAGTATCATCAATTTTAGGAGCAGTAAATTTTATTACTACTGTTATTAATATACGATCAGCAGGAATTACATTAgatcgattacctttatttgtttgatctgttgtaatt	Ochlerotatus caspius haplotype 42 cytochrome oxidase subunit 1 gene, partial cds; mitochondrial
HM535292	594	species	120870	Ochlerotatus caspius	190765	Ochlerotatus	7157	Culicidae	2759	Eukaryota	D	GGATCAGGAACAGGATGAAC	0	GATCAAACAAATAAAGGTAATCGATC	0	154	agtggaaaatggatcaggaacaggatgaacAGTTTATCCACCTCTTTCATCTGGAACTGCTCATGCAGGAGCCTCAGTAGATTTAACAATTTTTTCTTTACATTTAGCAGGAGTATCATCAATTTTAGGAGCAGTAAATTTTATTACTACTGTTATTAATATACGATCAGCAGGAATTACATTAgatcgattacctttatttgtttgatctgttgtaatt	Ochlerotatus caspius haplotype 41 cytochrome oxidase subunit 1 gene, partial cds; mitochondrial
HM535291	594	species	120870	Ochlerotatus caspius	190765	Ochlerotatus	7157	Culicidae	2759	Eukaryota	D	GGGTCAGGAACAGGATGAAC	0	GATCAAACAAATAAAGGTAATCGATC	0	154	agtagaaaatgggtcaggaacaggatgaacAGTTTATCCACCTCTTTCATCTGGAACTGCTCATGCAGGAGCCTCAGTTGATTTAACAATTTTTTCTTTACATTTAGCAGGAGTATCATCAATTTTAGGAGCAGTAAATTTTATTACTACTGTTATTAATATACGATCAGCAGGAATTACATTAgatcgattacctttatttgtttgatctgttgtaatt	Ochlerotatus caspius haplotype 40 cytochrome oxidase subunit 1 gene, partial cds; mitochondrial
HM535290	594	species	120870	Ochlerotatus caspius	190765	Ochlerotatus	7157	Culicidae	2759	Eukaryota	D	GGGTCAGGAACAGGGTGAAC	0	GATCAAACAAATAAAGGTAATCGATC	0	154	agtagaaaatgggtcaggaacagggtgaacAGTTTATCCACCTCTTTCATCTGGAACTGCTCATGCAGGAGCCTCAGTTGATTTAACAATTTTTTCTTTACATTTAGCAGGAGTATCATCAATTTTAGGAGCAGTAAATTTTATTACTACTGTTATTAATATACGATCAGCAGGAATTACATTAgatcgattacctttatttgtttgatctgttgtaatt	Ochlerotatus caspius haplotype 39 cytochrome oxidase subunit 1 gene, partial cds; mitochondrial
HM535289	594	species	120870	Ochlerotatus caspius	190765	Ochlerotatus	7157	Culicidae	2759	Eukaryota	D	GGATCAGGAACAGGATGAAC	0	GATCAAACAAATAAAGGTAATCGATC	0	154	agtagaaaatggatcaggaacaggatgaacAGTTTATCCACCTCTTTCATCTGGAACTGCTCATGCGGGAGCCTCAGTTGATTTAACAATTTTTTCTTTACATTTAGCAGGAGTATCATCAATTTTAGGAGCAGTAAATTTTATTACTACTGTTATTAATATACGATCAGCAGGAATTACATTAgatcgattacctttatttgtttgatctgttgtaatt	Ochlerotatus caspius haplotype 38 cytochrome oxidase subunit 1 gene, partial cds; mitochondrial
HM535288	594	species	120870	Ochlerotatus caspius	190765	Ochlerotatus	7157	Culicidae	2759	Eukaryota	D	GGGTCAGGAACAGGATGAAC	0	GATCAAACAAATAAAGGTAATCGATC	0	154	agtggaaaatgggtcaggaacaggatgaacAGTTTATCCACCTCTTTCATCTGGAACTGCTCATGCAGGAGCCTCAGTTGATTTAACAATTTTTTCTTTACATTTAGCAGGAGTATCATCAATTTTAGGAGCAGTAAATTTTATTACTACTGTTATTAATATACGATCAGCAGGAATTACATTAgatcgattacctttatttgtttgatctgttgtaatt	Ochlerotatus caspius haplotype 37 cytochrome oxidase subunit 1 gene, partial cds; mitochondrial
HM535287	594	species	120870	Ochlerotatus caspius	190765	Ochlerotatus	7157	Culicidae	2759	Eukaryota	D	GGGTCAGGAACAGGATGAAC	0	GATCAAACAAATAAAGGTAATCGATC	0	154	agtagaaaatgggtcaggaacaggatgaacAGTTTATCCACCTCTTTCATCTGGAACTGCTCATGCAGGAGCCTCAGTTGATTTAACAATTTTTTCTTTACATTTAGCAGGAGTATCATCAATTTTAGGAGCAGTAAATTTTATTACTACTGTTATTAATATACGATCAGCAGGAATTACATTAgatcgattacctttatttgtttgatctgttgtaatt	Ochlerotatus caspius haplotype 36 cytochrome oxidase subunit 1 gene, partial cds; mitochondrial
HM535286	594	species	120870	Ochlerotatus caspius	190765	Ochlerotatus	7157	Culicidae	2759	Eukaryota	D	GGATCAGGAACAGGGTGAAC	0	GATCAAACAAATAAAGGTAATCGATC	0	154	agtagaaaatggatcaggaacagggtgaacAGTTTATCCACCTCTTTCATCTGGAACTGCTCATGCAGGAGCCTCAGTTGATTTAACAATTTTTTCTTTACATTTAGCAGGAGTATCATCAATTTTAGGAGCAGTAAATTTTATTACTACTGTTATTAATATACGATCAGCAGGAATTACATTAgatcgattacctttatttgtttgatccgttgtaatt	Ochlerotatus caspius haplotype 35 cytochrome oxidase subunit 1 gene, partial cds; mitochondrial
HM535285	594	species	120870	Ochlerotatus caspius	190765	Ochlerotatus	7157	Culicidae	2759	Eukaryota	D	GGATCAGGAACAGGATGAAC	0	GATCAAACAAATAAAGGTAATCGATC	0	154	agtggaaaatggatcaggaacaggatgaacAGTTTATCCACCTCTTTCATCTGGAACTGCTCATGCAGGAGCCTCAGTAGATTTAACAATTTTTTCTTTACATTTAGCAGGAGTATCATCAATTTTAGGAGCAGTAAATTTTATTACTACTGTTATTAATATACGATCAGCAGGAATTACATTAgatcgattacctttatttgtttgatctgttgtaatt	Ochlerotatus caspius haplotype 34 cytochrome oxidase subunit 1 gene, partial cds; mitochondrial
HM535284	594	species	120870	Ochlerotatus caspius	190765	Ochlerotatus	7157	Culicidae	2759	Eukaryota	D	GGATCAGGAACAGGATGAAC	0	GATCAAACAAATAAAGGTAATCGATC	0	154	agtggaaaatggatcaggaacaggatgaacAGTTTATCCACCTCTTTCATCTGGAACTGCCCATGCAGGAGCCTCAGTAGATTTAACAATTTTTTCTTTACATTTAGCAGGAGTATCATCAATTTTAGGAGCAGTAAATTTTATTACTACTGTTATTAATATACGATCAGCAGGAATTACATTAgatcgattacctttatttgtttgatctgttgtaatt	Ochlerotatus caspius haplotype 33 cytochrome oxidase subunit 1 gene, partial cds; mitochondrial
HM535283	594	species	120870	Ochlerotatus caspius	190765	Ochlerotatus	7157	Culicidae	2759	Eukaryota	D	GGATCAGGAACAGGATGAAC	0	GATCAAACAAATAAAGGTAATCGATC	0	154	agtggaaaatggatcaggaacaggatgaacAGTTTATCCACCTCTTTCATCTGGAACTGCTCATGCAGGAGCCTCAGTAGATTTAACAATTTTTTCTTTACATTTAGCAGGAGTATCATCAATTTTAGGAGCAGTAAATTTTATTACTACTGTTATTAATATACGATCAGCAGGAATTACATTAgatcgattacctttatttgtttgatctgttgtaatt	Ochlerotatus caspius haplotype 32 cytochrome oxidase subunit 1 gene, partial cds; mitochondrial
HM535282	594	species	120870	Ochlerotatus caspius	190765	Ochlerotatus	7157	Culicidae	2759	Eukaryota	D	GGGTCAGGAACAGGATGAAC	0	GATCAAACAAATAAAGGTAATCGATC	0	154	agtagaaaatgggtcaggaacaggatgaacAGTTTATCCACCTCTTTCATCTGGAACTGCTCATGCAGGAGCCTCAGTTGATTTAACAATTTTTTCTTTACATTTAGCAGGAGTATCATCAATTTTAGGAGCAGTAAATTTTATTACTACTGTTATTAATATACGATCAGCAGGAATTACATTAgatcgattacctttatttgtttgatctgttgtaatt	Ochlerotatus caspius haplotype 31 cytochrome oxidase subunit 1 gene, partial cds; mitochondrial
HM535281	594	species	120870	Ochlerotatus caspius	190765	Ochlerotatus	7157	Culicidae	2759	Eukaryota	D	GGATCAGGAACAGGATGAAC	0	GATCAAACAAATAAAGGTAATCGATC	0	154	agtggaaaatggatcaggaacaggatgaacAGTTTATCCACCTCTTTCATCTGGAACTGCTCATGCAGGAGCCTCAGTAGATTTAACAATTTTTTCTTTACATTTAGCAGGAGTATCATCAATTTTAGGAGCAGTAAATTTTATTACTACTGTTATTAATATACGATCAGCAGGAATTACATTAgatcgattacctttatttgtttgatctgttgtaatt	Ochlerotatus caspius haplotype 30 cytochrome oxidase subunit 1 gene, partial cds; mitochondrial
HM535280	594	species	120870	Ochlerotatus caspius	190765	Ochlerotatus	7157	Culicidae	2759	Eukaryota	D	GGGTCAGGAACAGGATGAAC	0	GATCAAACAAATAAAGGTAATCGATC	0	154	agtggaaaatgggtcaggaacaggatgaacAGTTTATCCACCTCTTTCATCTGGAACTGCTCATGCAGGAGCCTCAGTAGATTTAACAATTTTTTCTTTACATTTAGCAGGAGTATCATCAATTTTAGGAGCAGTAAATTTTATTACTACTGTTATTAATATACGATCAGCAGGAATTACATTAgatcgattacctttatttgtttgatctgttgtaatt	Ochlerotatus caspius haplotype 29 cytochrome oxidase subunit 1 gene, partial cds; mitochondrial
HM535279	594	species	120870	Ochlerotatus caspius	190765	Ochlerotatus	7157	Culicidae	2759	Eukaryota	D	GGATCAGGAACAGGATGAAC	0	GATCAAACAAATAAAGGTAATCGATC	0	154	agtagaaaatggatcaggaacaggatgaacAGTTTATCCACCTCTTTCATCTGGAACTGCTCATGCAGGAGCCTCAGTAGATTTAACAATTTTTTCTTTACATTTAGCAGGAGTATCATCAATTTTAGGAGCAGTAAATTTTATTACTACTGTTATTAATATACGATCAGCAGGAATTACATTAgatcgattacctttatttgtttgatctgttgtaatt	Ochlerotatus caspius haplotype 28 cytochrome oxidase subunit 1 gene, partial cds; mitochondrial
HM535278	594	species	120870	Ochlerotatus caspius	190765	Ochlerotatus	7157	Culicidae	2759	Eukaryota	D	GGGTCAGGAACAGGATGAAC	0	GATCAAACAAATAAAGGTAATCGATC	0	154	agtagaaaatgggtcaggaacaggatgaacAGTTTATCCACCTCTTTCATCTGGAACTGCTCACGCAGGAGCCTCAGTTGATTTAACAATTTTTTCTTTACATTTAGCAGGAGTATCATCAATTTTAGGAGCAGTAAATTTTATTACTACTGTTATTAATATACGATCAGCAGGAATTACATTAgatcgattacctttatttgtttgatctgttgtaatt	Ochlerotatus caspius haplotype 27 cytochrome oxidase subunit 1 gene, partial cds; mitochondrial
HM535277	594	species	120870	Ochlerotatus caspius	190765	Ochlerotatus	7157	Culicidae	2759	Eukaryota	D	GGATCAGGAACAGGATGAAC	0	GATCAAACAAATAAAGGTAATCGATC	0	154	agtagaaaatggatcaggaacaggatgaacAGTTTATCCACCTCTTTCATCTGGAACTGCTCATGCAGGAGCCTCAGTTGATTTAACAATTTTTTCTTTACATTTAGCAGGAGTATCATCAATTTTAGGAGCAGTAAATTTTATTACTACTGTTATTAATATACGATCAGCAGGAATTACATTAgatcgattacctttatttgtttgatccgttgtaatt	Ochlerotatus caspius haplotype 26 cytochrome oxidase subunit 1 gene, partial cds; mitochondrial
HM535276	594	species	120870	Ochlerotatus caspius	190765	Ochlerotatus	7157	Culicidae	2759	Eukaryota	D	GGATCAGGAACAGGATGAAC	0	GATCAAACAAATAAAGGTAATCGATC	0	154	agtggaaaatggatcaggaacaggatgaacAGTTTATCCACCTCTTTCATCTGGAACTGCTCATGCAGGAGCCTCAGTAGATTTAACAATTTTTTCTTTACATTTAGCAGGAGTATCATCAATTTTAGGAGCAGTAAATTTTATTACTACTGTTATTAATATACGATCAGCAGGAATTACATTAgatcgattacctttatttgtttgatctgttgtaatt	Ochlerotatus caspius haplotype 25 cytochrome oxidase subunit 1 gene, partial cds; mitochondrial
HM535275	594	species	120870	Ochlerotatus caspius	190765	Ochlerotatus	7157	Culicidae	2759	Eukaryota	D	GGATCAGGAACAGGATGAAC	0	GATCAAACAAATAAAGGTAATCGATC	0	154	agtggaaaatggatcaggaacaggatgaacAGTTTATCCACCTCTTTCATCTGGAACTGCTCATGCAGGAGCCTCAGTAGATTTAACAATTTTTTCTTTACATTTAGCAGGAGTATCATCAATTTTAGGAGCAGTAAATTTTATTACTACTGTTATTAATATACGATCAGCAGGAATTACATTAgatcgattacctttatttgtttgatctgttgtaatt	Ochlerotatus caspius haplotype 24 cytochrome oxidase subunit 1 gene, partial cds; mitochondrial
HM535274	594	species	120870	Ochlerotatus caspius	190765	Ochlerotatus	7157	Culicidae	2759	Eukaryota	D	GGGTCAGGAACAGGATGAAC	0	GATCAAACAAATAAAGGTAATCGATC	0	154	agtggaaaatgggtcaggaacaggatgaacAGTTTATCCACCTCTTTCATCTGGAACTGCTCATGCAGGAGCCTCAGTAGATTTAACAATTTTTTCTTTACATTTAGCAGGAGTATCATCAATTTTAGGAGCAGTAAATTTTATTACTACTGTTATTAATATACGATCAGCAGGAATTACATTAgatcgattacctttatttgtttgatctgttgtaatt	Ochlerotatus caspius haplotype 23 cytochrome oxidase subunit 1 gene, partial cds; mitochondrial
HM535273	594	species	120870	Ochlerotatus caspius	190765	Ochlerotatus	7157	Culicidae	2759	Eukaryota	D	GGATCAGGAACAGGATGAAC	0	GATCAAACAAATAAAGGTAATCGATC	0	154	agtggaaaatggatcaggaacaggatgaacAGTTTATCCACCTCTTTCATCTGGAACTGCTCATGCAGGAGCCTCAGTAGATTTAACAATTTTTTCTTTACATTTAGCAGGAGTATCATCAATTTTAGGAGCAGTAAATTTTATTACTACTGTTATTAATATACGATCAGCAGGAATTACATTAgatcgattacctttatttgtttgatctgttgtaatt	Ochlerotatus caspius haplotype 22 cytochrome oxidase subunit 1 gene, partial cds; mitochondrial
HM535272	594	species	120870	Ochlerotatus caspius	190765	Ochlerotatus	7157	Culicidae	2759	Eukaryota	D	GGGTCAGGAACAGGGTGAAC	0	GATCAAACAAATAAAGGTAATCGATC	0	154	agtggaaaatgggtcaggaacagggtgaacAGTTTATCCACCTCTTTCATCTGGAACTGCTCATGCAGGAGCCTCAGTAGATTTAACAATTTTTTCTTTACATTTAGCAGGAGTATCATCAATTTTAGGAGCAGTAAATTTTATTACTACTGTTATTAATATACGATCAGCAGGAATTACATTAgatcgattacctttatttgtttgatctgttgtaatt	Ochlerotatus caspius haplotype 21 cytochrome oxidase subunit 1 gene, partial cds; mitochondrial
HM535271	594	species	120870	Ochlerotatus caspius	190765	Ochlerotatus	7157	Culicidae	2759	Eukaryota	D	GGGTCAGGAACAGGATGAAC	0	GATCAAACAAATAAAGGTAATCGATC	0	154	agtagaaaatgggtcaggaacaggatgaacAGTTTATCCACCTCTTTCATCTGGAACTGCTCATGCAGGAGCCTCAGTTGATTTAACAATTTTTTCTTTACATTTAGCAGGAGTATCATCAATTTTAGGAGCAGTAAATTTTATTACTACTGTTATTAATATACGATCAGCAGGAATTACATTAgatcgattacctttatttgtttgatctgttgtaatt	Ochlerotatus caspius haplotype 20 cytochrome oxidase subunit 1 gene, partial cds; mitochondrial
HM535270	594	species	120870	Ochlerotatus caspius	190765	Ochlerotatus	7157	Culicidae	2759	Eukaryota	D	GGATCAGGAACAGGATGAAC	0	GATCAAACAAATAAAGGTAATCGATC	0	154	agtggaaaatggatcaggaacaggatgaacAGTTTATCCACCTCTTTCATCTGGAACTGCTCATGCAGGAGCCTCAGTAGATTTAACAATTTTTTCTTTACATTTAGCAGGAGTATCATCAATTTTAGGAGCAGTAAATTTTATTACTACTGTTATTAATATACGATCAGCAGGAATTACATTAgatcgattacctttatttgtttgatctgttgtaatt	Ochlerotatus caspius haplotype 19 cytochrome oxidase subunit 1 gene, partial cds; mitochondrial
HM535269	594	species	120870	Ochlerotatus caspius	190765	Ochlerotatus	7157	Culicidae	2759	Eukaryota	D	GGATCAGGAACAGGATGAAC	0	GATCAAACAAATAAAGGTAATCGATC	0	154	agtggaaaatggatcaggaacaggatgaacAGTTTATCCACCTCTTTCATCTGGAACTGCTCATGCAGGAGCCTCAGTAGATTTAACAATTTTTTCTTTACATTTAGCAGGAGTATCATCAATTTTAGGAGCAGTAAATTTTATTACTACTGTTATTAATATACGATCAGCAGGAATTACATTAgatcgattacctttatttgtttgatctgttgtaatt	Ochlerotatus caspius haplotype 18 cytochrome oxidase subunit 1 gene, partial cds; mitochondrial
HM535268	594	species	120870	Ochlerotatus caspius	190765	Ochlerotatus	7157	Culicidae	2759	Eukaryota	D	GGGTCAGGAACAGGATGAAC	0	GATCAAACAAATAAAGGTAATCGATC	0	154	agtggaaaatgggtcaggaacaggatgaacAGTTTATCCACCTCTTTCATCTGGAACTGCTCATGCAGGAGCCTCAGTAGATTTAACAATTTTTTCTTTACATTTAGCAGGAGTATCATCAATTTTAGGAGCAGTAAATTTTATTACTACTGTTATTAATATACGATCAGCAGGAATTACATTAgatcgattacctttatttgtttgatctgttgtaatt	Ochlerotatus caspius haplotype 17 cytochrome oxidase subunit 1 gene, partial cds; mitochondrial
HM535267	594	species	120870	Ochlerotatus caspius	190765	Ochlerotatus	7157	Culicidae	2759	Eukaryota	D	GGATCAGGAACAGGATGAAC	0	GATCAAACAAATAAAGGTAATCGATC	0	154	agtggaaaatggatcaggaacaggatgaacAGTTTATCCACCTCTTTCATCTGGAACTGCTCATGCAGGAGCCTCAGTAGATTTAACAATTTTTTCTTTACATTTAGCAGGAGTATCATCAATTTTAGGAGCAGTAAATTTTATTACTACTGTTATTAATATACGATCAGCAGGAATTACATTAgatcgattacctttatttgtttgatccgttgtaatt	Ochlerotatus caspius haplotype 16 cytochrome oxidase subunit 1 gene, partial cds; mitochondrial
HM535266	594	species	120870	Ochlerotatus caspius	190765	Ochlerotatus	7157	Culicidae	2759	Eukaryota	D	GGGTCAGGAACAGGATGAAC	0	GATCAAACAAATAAAGGTAATCGATC	0	154	agtagaaaatgggtcaggaacaggatgaacAGTTTATCCACCTCTTTCATCTGGAACTGCTCATGCAGGAGCCTCAGTTGATTTAACAATTTTTTCTTTACATTTAGCAGGAGTATCATCAATTTTAGGAGCAGTAAATTTTATTACTACTGTTATTAATATACGATCAGCAGGAATTACATTAgatcgattacctttatttgtttgatctgttgtaatt	Ochlerotatus caspius haplotype 15 cytochrome oxidase subunit 1 gene, partial cds; mitochondrial
HM535265	594	species	120870	Ochlerotatus caspius	190765	Ochlerotatus	7157	Culicidae	2759	Eukaryota	D	GGGTCAGGAACAGGATGAAC	0	GATCAAACAAATAAAGGTAATCGATC	0	154	agtggaaaatgggtcaggaacaggatgaacAGTTTATCCACCTCTTTCATCTGGAACTGCTCATGCAGGAGCCTCAGTAGATTTAACAATTTTTTCTTTACATTTAGCAGGAGTATCATCAATTTTAGGAGCAGTAAATTTTATTACTACTGTTATTAATATACGATCAGCAGGAATTACATTAgatcgattacctttatttgtttgatctgttgtaatt	Ochlerotatus caspius haplotype 14 cytochrome oxidase subunit 1 gene, partial cds; mitochondrial
HM535264	594	species	120870	Ochlerotatus caspius	190765	Ochlerotatus	7157	Culicidae	2759	Eukaryota	D	GGGTCAGGAACAGGATGAAC	0	GATCAAACAAATAAAGGTAATCGATC	0	154	agtggaaaatgggtcaggaacaggatgaacAGTTTATCCACCTCTTTCATCTGGAACTGCTCATGCAGGAGCCTCAGTAGATTTAACAATTTTTTCTTTACATTTAGCAGGAGTATCATCAATTTTAGGAGCAGTAAATTTTATTACTACTGTTATTAATATACGATCAGCAGGAATTACATTAgatcgattacctttatttgtttgatctgttgtaatt	Ochlerotatus caspius haplotype 13 cytochrome oxidase subunit 1 gene, partial cds; mitochondrial
HM535263	594	species	120870	Ochlerotatus caspius	190765	Ochlerotatus	7157	Culicidae	2759	Eukaryota	D	GGATCAGGAACAGGGTGAAC	0	GATCAAACAAATAAAGGTAATCGATC	0	154	agtagaaaatggatcaggaacagggtgaacAGTTTATCCACCTCTTTCATCTGGAACTGCTCATGCAGGAGCCTCAGTTGATTTAACAATTTTTTCTTTACATTTAGCAGGAGTATCATCAATTTTAGGAGCAGTAAATTTTATTACTACTGTTATTAATATACGATCAGCAGGAATTACATTAgatcgattacctttatttgtttgatccgttgtaatt	Ochlerotatus caspius haplotype 12 cytochrome oxidase subunit 1 gene, partial cds; mitochondrial
HM535262	594	species	120870	Ochlerotatus caspius	190765	Ochlerotatus	7157	Culicidae	2759	Eukaryota	D	GGATCAGGAACAGGATGAAC	0	GATCAAACAAATAAAGGTAATCGATC	0	154	agtggaaaatggatcaggaacaggatgaacAGTTTATCCACCTCTTTCATCTGGAACTGCTCATGCAGGAGCCTCAGTAGATTTAACAATTTTTTCTTTACATTTAGCAGGAGTATCATCAATTTTAGGAGCAGTAAATTTTATTACTACTGTTATTAATATACGATCAGCAGGAATTACATTAgatcgattacctttatttgtttgatctgttgtaatt	Ochlerotatus caspius haplotype 11 cytochrome oxidase subunit 1 gene, partial cds; mitochondrial
HM535261	594	species	120870	Ochlerotatus caspius	190765	Ochlerotatus	7157	Culicidae	2759	Eukaryota	D	GGGTCAGGAACAGGATGAAC	0	GATCAAACAAATAAAGGTAATCGATC	0	154	agtagaaaatgggtcaggaacaggatgaacAGTTTATCCACCTCTTTCATCTGGAACTGCTCATGCAGGAGCCTCAGTTGATTTAACAATTTTTTCTTTACATTTAGCAGGAGTATCATCAATTTTAGGAGCAGTAAATTTTATTACTACTGTTATTAATATACGATCAGCAGGAATTACATTAgatcgattacctttatttgtttgatctgttgtaatt	Ochlerotatus caspius haplotype 10 cytochrome oxidase subunit 1 gene, partial cds; mitochondrial
HM535260	594	species	120870	Ochlerotatus caspius	190765	Ochlerotatus	7157	Culicidae	2759	Eukaryota	D	GGGTCAGGAACAGGATGAAC	0	GATCAAACAAATAAAGGTAATCGATC	0	154	agtggaaaatgggtcaggaacaggatgaacAGTTTATCCACCTCTTTCATCTGGAACTGCTCACGCAGGAGCCTCAGTAGATTTAACAATTTTTTCTTTACATTTAGCAGGAGTATCATCAATTTTAGGAGCAGTAAATTTTATTACTACTGTTATTAATATACGATCAGCAGGAATTACATTAgatcgattacctttatttgtttgatctgttgtaatt	Ochlerotatus caspius haplotype 9 cytochrome oxidase subunit 1 gene, partial cds; mitochondrial
HM535259	594	species	120870	Ochlerotatus caspius	190765	Ochlerotatus	7157	Culicidae	2759	Eukaryota	D	GGATCAGGAACAGGATGAAC	0	GATCAAACAAATAAAGGTAATCGATC	0	154	agtggaaaatggatcaggaacaggatgaacAGTTTATCCACCTCTTTCATCTGGAACTGCTCATGCAGGAGCCTCAGTAGATTTAACAATTTTTTCTTTACATTTAGCAGGAGTATCATCAATTTTAGGAGCAGTAAATTTTATTACTACTGTTATTAATATACGATCAGCAGGAATTACATTAgatcgattacctttatttgtttgatctgttgtaatt	Ochlerotatus caspius haplotype 8 cytochrome oxidase subunit 1 gene, partial cds; mitochondrial
HM535258	594	species	120870	Ochlerotatus caspius	190765	Ochlerotatus	7157	Culicidae	2759	Eukaryota	D	GGGTCAGGAACAGGATGAAC	0	GATCAAACAAATAAAGGTAATCGATC	0	154	agtggaaaatgggtcaggaacaggatgaacAGTTTATCCACCTCTTTCATCTGGAACTGCTCATGCAGGGGCCTCAGTAGATTTAACAATTTTTTCTTTACATTTAGCAGGAGTATCATCAATTTTAGGAGCAGTAAATTTTATTACTACTGTTATTAATATACGATCAGCAGGAATTACATTAgatcgattacctttatttgtttgatctgttgtaatt	Ochlerotatus caspius haplotype 7 cytochrome oxidase subunit 1 gene, partial cds; mitochondrial
HM535257	594	species	120870	Ochlerotatus caspius	190765	Ochlerotatus	7157	Culicidae	2759	Eukaryota	D	GGGTCAGGAACAGGATGAAC	0	GATCAAACAAATAAAGGTAATCGATC	0	154	agtggaaaatgggtcaggaacaggatgaacAGTTTATCCACCTCTTTCATCTGGAACTGCTCATGCAGGAGCCTCAGTAGATTTAACAATTTTTTCTTTACATTTAGCAGGAGTATCATCAATTTTAGGAGCAGTAAATTTTATTACTACTGTTATTAATATACGATCAGCAGGAATTACATTAgatcgattacctttatttgtttgatctgttgtaatt	Ochlerotatus caspius haplotype 6 cytochrome oxidase subunit 1 gene, partial cds; mitochondrial
HM535256	594	species	120870	Ochlerotatus caspius	190765	Ochlerotatus	7157	Culicidae	2759	Eukaryota	D	GGATCAGGAACAGGATGAAC	0	GATCAAACAAATAAAGGTAATCGATC	0	154	agtagaaaatggatcaggaacaggatgaacAGTTTATCCACCTCTTTCATCTGGAACTGCTCATGCAGGAGCCTCAGTTGATTTAACAATTTTTTCTTTACATTTAGCAGGAGTATCATCAATTTTAGGAGCAGTAAATTTTATTACTACTGTTATTAATATACGATCAGCAGGAATTACATTAgatcgattacctttatttgtttgatctgttgtaatt	Ochlerotatus caspius haplotype 5 cytochrome oxidase subunit 1 gene, partial cds; mitochondrial
HM535255	594	species	120870	Ochlerotatus caspius	190765	Ochlerotatus	7157	Culicidae	2759	Eukaryota	D	GGATCAGGAACAGGATGAAC	0	GATCAAACAAATAAAGGTAATCGATC	0	154	agtagaaaatggatcaggaacaggatgaacAGTTTATCCACCTCTTTCATCTGGAACTGCTCATGCAGGAGCCTCAGTTGATTTAACAATTTTTTCTTTACATTTAGCAGGAGTATCATCAATTTTAGGAGCAGTAAATTTTATTACTACTGTTATTAATATACGATCAGCAGGAATTACATTAgatcgattacctttatttgtttgatctgttgtaatt	Ochlerotatus caspius haplotype 4 cytochrome oxidase subunit 1 gene, partial cds; mitochondrial
HM535254	594	species	120870	Ochlerotatus caspius	190765	Ochlerotatus	7157	Culicidae	2759	Eukaryota	D	GGGTCAGGAACAGGATGAAC	0	GATCAAACAAATAAAGGTAATCGATC	0	154	agtggaaaatgggtcaggaacaggatgaacAGTTTATCCACCTCTTTCATCTGGAACTGCTCATGCAGGAGCCTCAGTAGATTTAACAATTTTTTCTTTACATTTAGCAGGAGTATCATCAATTTTAGGAGCAGTAAATTTTATTACTACTGTTATTAATATACGATCAGCAGGAATTACATTAgatcgattacctttatttgtttgatctgttgtaatt	Ochlerotatus caspius haplotype 3 cytochrome oxidase subunit 1 gene, partial cds; mitochondrial
HM535253	594	species	120870	Ochlerotatus caspius	190765	Ochlerotatus	7157	Culicidae	2759	Eukaryota	D	GGATCAGGAACAGGATGAAC	0	GATCAAACAAATAAAGGTAATCGATC	0	154	agtagaaaatggatcaggaacaggatgaacAGTTTATCCACCTCTTTCATCTGGAACTGCTCATGCAGGAGCCTCAGTTGATTTAACAATTTTTTCTTTACATTTAGCAGGAGTATCATCAATTTTAGGAGCAGTAAATTTTATTACTACTGTTATTAATATACGATCAGCAGGAATTACATTAgatcgattacctttatttgtttgatccgttgtaatt	Ochlerotatus caspius haplotype 2 cytochrome oxidase subunit 1 gene, partial cds; mitochondrial
HM535252	594	species	120870	Ochlerotatus caspius	190765	Ochlerotatus	7157	Culicidae	2759	Eukaryota	D	GGATCAGGAACAGGGTGAAC	0	GATCAAACAAATAAAGGTAATCGATC	0	154	agtagaaaatggatcaggaacagggtgaacAGTTTATCCACCTCTTTCATCTGGAACTGCTCATGCAGGAGCCTCAGTTGATTTAACAATTTTTTCTTTACATTTAGCAGGAGTATCATCAATTTTAGGAGCAGTAAATTTTATTACTACTGTTATTAATATACGATCAGCAGGAATTACATTAgatcgattacctttatttgtttgatccgttgtaatt	Ochlerotatus caspius haplotype 1 cytochrome oxidase subunit 1 gene, partial cds; mitochondrial
HM102286	603	species	7160	Aedes albopictus	7158	Aedes	7157	Culicidae	2759	Eukaryota	D	GGAGCTGGAACAGGGTGAAC	0	GATCACACAAATAAAGGTAGTCGATC	2	154	agtagaaaacggagctggaacagggtgaacGGTTTATCCTCCCCTTTCTTCTGGAACAGCTCATGCTGGGGCTTCAGTTGATTTAGCAATTTTTTCTTTACATTTAGCGGGAATCTCATCTATTTTAGGAGCAGTAAATTTTATTACAACTGTAATTAATATACGATCAGCTGGTATTACTCTTgatcgactacctttatttgtgtgatcagtagtaatt	Aedes albopictus strain ATCC CCL-126 cytochrome oxidase subunit 1 (COI) gene, partial cds; mitochondrial
JN298726	658	species	569589	Ochlerotatus vigilax	190765	Ochlerotatus	7157	Culicidae	2759	Eukaryota	D	GGGTCTGGGACAGGATGAAC	0	GATCACACAAATAATGGTAATCGGTC	3	154	agtagaaaatgggtctgggacaggatgaacAGTTTATCCACCTTTGTCATCTGGAACTGCCCATGCAGGAGCTTCAGTAGATTTAACAATTTTTTCTTTACATTTAGCCGGAATTTCATCAATTTTAGGAGCTGTAAATTTTATTACTACTGTAATTAATATACGATCTGCTGGAATTACTTTAgaccgattaccattatttgtgtgatctgttgtaatt	Diptera sp. BOLD:AAC1707 voucher gvc15162-1L cytochrome oxidase subunit 1 (COI) gene, partial cds; mitochondrial
JN266584	658	species	308735	Mansonia uniformis	149459	Mansonia	7157	Culicidae	2759	Eukaryota	D	GGAGCTGGAACTGGATGAAC	0	GATCAAACAAATAAAGGTATTCGATC	0	154	agtagaaaatggagctggaactggatgaacAGTTTATCCTCCTTTATCAGCTAATACAGCTCATACTGGGGCATCCGTTGATTTAACAATTTTTTCTTTACATTTAGCTGGAGTTTCTTCAATTTTAGGAGCAGTAAATTTTATTACTACTGTTATTAATATACGATCTTCAGGAATTACTTTAgatcgaatacctttatttgtttgatctgtagtaatt	Diptera sp. BOLD:AAB7892 voucher BIOUG<CAN>:gvc16293-1L cytochrome oxidase subunit 1 (COI) gene, partial cds; mitochondrial
JN266583	658	species	308735	Mansonia uniformis	149459	Mansonia	7157	Culicidae	2759	Eukaryota	D	GGAGCTGGAACTGGATGAAC	0	GATCAAACAAATAAAGGTATTCGATC	0	154	agtagaaaatggagctggaactggatgaacAGTTTATCCTCCTTTATCAGCTAATACAGCTCATACTGGAGCATCCGTTGATTTAACAATTTTTTCTTTACATTTAGCCGGAATTTCTTCAATTTTAGGAGCAGTAAATTTTATTACTACTGTTATTAATATACGATCTTCAGGAATTACTTTAgatcgaatacctttatttgtttgatctgtagtaatt	Diptera sp. BOLD:AAB7892 voucher gvc16155-1L cytochrome oxidase subunit 1 (COI) gene, partial cds; mitochondrial
JN266582	658	species	1806185	Ochlerotatus vittiger	190765	Ochlerotatus	7157	Culicidae	2759	Eukaryota	D	GGATCTGGTACAGGATGAAC	0	GATCAAACAAATAAAGGTAATCGATC	0	154	agtagaaaatggatctggtacaggatgaacAGTTTATCCACCTCTATCATCTGGAACTGCTCATGCAGGAGCTTCAGTTGATTTAACAATTTTTTCTCTTCATTTAGCAGGAGTTTCTTCTATTTTAGGAGCAGTAAATTTTATTACTACTGTAATTAATATACGATCTTCTGGAATTACATTAgatcgattacctttatttgtttgatctgttgttatt	Diptera sp. BOLD:AAE2446 voucher gvc15352-1L cytochrome oxidase subunit 1 (COI) gene, partial cds; mitochondrial
JN266581	658	species	508665	Aedes notoscriptus	7158	Aedes	7157	Culicidae	2759	Eukaryota	D	GGCTCTGGAACTGGATGAAC	1	GATCAAACAAATAAAGGAAGACGATT	4	154	agtagaaaatggctctggaactggatgaacCGTTTATCCTCCACTATCTTCTGGAACTGCACATGCTGGAGCTTCAGTTGATTTAACAATTTTTTCTCTACATTTAGCAGGAGTATCTTCTATTTTAGGGGCTGTAAATTTTATTACTACTGTAATTAATATACGATCTTCAGGAATTACTTTAaatcgtcttcctttatttgtttgatctgttgtaatt	Diptera sp. BOLD:AAE5973 voucher gvc15324-1L cytochrome oxidase subunit 1 (COI) gene, partial cds; mitochondrial
JN266579	658	species	508665	Aedes notoscriptus	7158	Aedes	7157	Culicidae	2759	Eukaryota	D	GGCTCTGGAACTGGATGAAC	1	GATCAAACAAATAAAGGAAGACGATC	3	154	agtagaaaatggctctggaactggatgaacCGTTTATCCTCCACTATCTTCTGGAACTGCACATGCTGGAGCTTCAGTTGATTTAACAATTTTTTCTCTACATTTAGCAGGAGTATCTTCTATTTTAGGAGCTGTAAATTTTATTACTACTGTAATTAATATACGATCTTCAGGAATTACTTTAgatcgtcttcctttatttgtttgatctgttgtaatt	Diptera sp. BOLD:AAE5973 voucher gvc15108-1L cytochrome oxidase subunit 1 (COI) gene, partial cds; mitochondrial
JF872542	658	species	569589	Ochlerotatus vigilax	190765	Ochlerotatus	7157	Culicidae	2759	Eukaryota	D	GGGTCTGGGACAGGATGAAC	0	GATCACACAAATAATGGTAATCGGTC	3	154	agtagaaaatgggtctgggacaggatgaacAGTTTATCCACCTTTGTCATCTGGAACTGCCCATGCAGGAGCTTCAGTAGATTTAACAATTTTTTCTTTACATTTAGCCGGAATTTCATCAATTTTAGGAGCTGTAAATTTTATTACTACTGTAATTAATATACGATCTGCTGGAATTACTTTAgaccgattaccattatttgtgtgatctgttgtaatt	Diptera sp. BOLD:AAC1707 voucher BIOUG<CAN>:09-NSWHH-2404 cytochrome oxidase subunit 1 (COI) gene, partial cds; mitochondrial
JF872539	658	species	569589	Ochlerotatus vigilax	190765	Ochlerotatus	7157	Culicidae	2759	Eukaryota	D	GGGTCTGGGACAGGATGAAC	0	GATCACACAAATAATGGTAATCGGTC	3	154	agtagaaaatgggtctgggacaggatgaacAGTTTATCCACCTTTGTCATCTGGAACTGCCCATGCAGGAGCTTCAGTAGATTTAACAATTTTTTCTTTACATTTAGCCGGAATTTCATCAATTTTAGGAGCTGTAAATTTTATTACTACTGTAATTAATATACGATCTGCTGGAATTACTTTAgaccgattaccattatttgtgtgatctgttgtaatt	Ochlerotatus vigilax voucher BIOUG<CAN>:09-NSWHH-2401 cytochrome oxidase subunit 1 (COI) gene, partial cds; mitochondrial
JF872402	658	species	508665	Aedes notoscriptus	7158	Aedes	7157	Culicidae	2759	Eukaryota	D	GGCTCTGGAACTGGATGAAC	1	GATCAAACAAATAAAGGAAGACGATC	3	154	agtagaaaatggctctggaactggatgaacCGTTTATCCTCCACTATCTTCTGGAACTGCACATGCTGGAGCTTCAGTTGATTTAACAATTTTTTCTCTACATTTAGCAGGAGTATCTTCTATTTTAGGAGCTGTAAATTTTATTACTACTGTAATTAATATACGATCTTCAGGAATTACTTTAgatcgtcttcctttatttgtttgatctgttgtaatt	Aedes notoscriptus voucher gvc14740-1L cytochrome oxidase subunit 1 (COI) gene, partial cds; mitochondrial
HQ945419	658	species	508665	Aedes notoscriptus	7158	Aedes	7157	Culicidae	2759	Eukaryota	D	GGCTCTGGAACTGGATGAAC	1	GATCAAACAAATAAAGGAAGACGATC	3	154	agtagaaaatggctctggaactggatgaacCGTTTATCCTCCACTATCTTCTGGAACTGCACATGCTGGAGCTTCAGTTGATTTAACAATTTTTTCTCTACATTTAGCAGGAGTATCTTCTATTTTAGGGGCTGTAAATTTTATTACTACTGTAATTAATATACGATCTTCAGGAATTACTTTAgatcgtcttcctttatttgtttgatctgttgtaatt	Aedes notoscriptus voucher gvc12233-1L cytochrome oxidase subunit 1 (COI) gene, partial cds; mitochondrial
HQ945416	658	species	7159	Aedes aegypti	7158	Aedes	7157	Culicidae	2759	Eukaryota	D	GGGGCAGGAACTGGGTGAAC	0	GATCAAACAAATAAAGGTAGTCGGTC	2	154	agtagaaaatggggcaggaactgggtgaacAGTTTATCCTCCTCTCTCTTCAGGAACAGCTCATGCTGGAGCTTCTGTTGATTTAGCTATTTTTTCTCTTCATTTAGCTGGAATTTCCTCAATTTTAGGGGCAGTAAATTTTATTACAACTGTAATTAATATACGATCGTCAGGAATTACTTTAgaccgactacctttatttgtttgatctgtagttatt	Aedes aegypti voucher gvc12144-1L cytochrome oxidase subunit 1 (COI) gene, partial cds; mitochondrial
HQ945414	658	species	508665	Aedes notoscriptus	7158	Aedes	7157	Culicidae	2759	Eukaryota	D	GGGTCTGGGACTGGATGAAC	0	GATCAAACAAATAAAGGAAGACGATC	3	154	agtagaaaatgggtctgggactggatgaacTGTTTATCCTCCTCTCTCATCTGGAACTGCTCATGCTGGAGCTTCAGTTGANTTAACAATTTTTTCTTTACACTTAGCAGGAGTATCCTCTATTTTAGGAGCTGTAAATTTTATTACTACTGTAATTAATATACGATCTTCAGGAATTACTTTAgatcgtcttcctttatttgtttgatctgttgtaatt	Aedes notoscriptus voucher gvc11960-1L cytochrome oxidase subunit 1 (COI) gene, partial cds; mitochondrial
HQ944973	658	species	7163	Aedes vexans	7158	Aedes	7157	Culicidae	2759	Eukaryota	D	GGAGCAGGGACAGGATGAAC	0	GATCAAACAAATAAAGGTAATCGATC	0	154	agtagaaaatggagcagggacaggatgaacAGTTTATCCTCCTCTTTCATCAGGAACAGCTCACGCTGGAGCTTCTGTTGATTTAGCAATTTTCTCTCTTCATTTAGCAGGGATTTCATCTATTTTAGGAGCAGTAAATTTTATTACTACTGTTATTAATATACGATCATCTGGGATTACTTTAgatcgattacctttatttgtttgatctgtagtaatt	Aedes vexans voucher BIOUG<CAN>:10BBDIP-0269 cytochrome oxidase subunit 1 (COI) gene, partial cds; mitochondrial
HQ944971	658	species	228917	Ochlerotatus canadensis	190765	Ochlerotatus	7157	Culicidae	2759	Eukaryota	D	GGGTCAGGGACAGGATGAAC	0	GATCAAACAAATAAAGGTAAACGATC	1	154	agtagaaaatgggtcagggacaggatgaacTGTTTACCCCCCTCTTTCATCTGGAACTGCCCACGCAGGAGCTTCAGTAGATTTAACAATTTTTTCTCTTCATTTAGCTGGAGTATCTTCTATTTTAGGAGCAGTAAATTTTATTACAACTGTTATTAATATACGATCAGCAGGAATTACTTTAgatcgtttacctttatttgtttgatctgttgtaatt	Ochlerotatus canadensis voucher BIOUG<CAN>:10BBDIP-0266 cytochrome oxidase subunit 1 (COI) gene, partial cds; mitochondrial
HQ944964	658	species	7163	Aedes vexans	7158	Aedes	7157	Culicidae	2759	Eukaryota	D	GGAGCAGGGACAGGATGAAC	0	GATCAAACAAATAAAGGTAATCGATC	0	154	agtagaaaatggagcagggacaggatgaacAGTTTATCCTCCTCTTTCATCAGGAACAGCTCACGCTGGAGCTTCTGTTGATTTAGCAATTTTCTCTCTTCATTTAGCAGGGATTTCATCTATTTTAGGAGCAGTAAATTTTATTACTACTGTTATTAATATACGATCATCTGGAATTACTTTAgatcgattacctttatttgtttgatctgtagtaatt	Aedes vexans voucher BIOUG<CAN>:10BBDIP-0259 cytochrome oxidase subunit 1 (COI) gene, partial cds; mitochondrial
HQ991722	658	species	7159	Aedes aegypti	7158	Aedes	7157	Culicidae	2759	Eukaryota	D	GGGGCAGGAACTGGGTGAAC	0	GATCAAACAAATAAAGGTAGTCGATC	1	154	agtagaaaatggggcaggaactgggtgaacAGTTTATCCTCCTCTCTCTTCAGGAACAGCTCATGCTGGAGCTTCTGTTGATTTAGCTATTTTTTCTCTTCATTTAGCTGGAATTTCCTCAATTTTAGGGGCAGTAAATTTTATTACAACTGTAATTAATATACGATCGTCAGGAATTACTTTAgatcgactacctttatttgtttgatctgtagttatt	Aedes aegypti voucher ISPI-2.1-1 cytochrome oxidase subunit 1 (COI) gene, partial cds; mitochondrial
HQ991721	658	species	7159	Aedes aegypti	7158	Aedes	7157	Culicidae	2759	Eukaryota	D	GGGGCAGGAACTGGGTGAAC	0	GATCAAACAAATAAAGGTAGTCGATC	1	154	agtagaaaatggggcaggaactgggtgaacAGTTTATCCTCCTCTCTCTTCAGGAACAGCTCATGCTGGAGCTTCTGTTGATTTAGCTATTTTTTCTCTTCATTTAGCTGGAATTTCCTCAATTTTAGGGGCAGTAAATTTTATTACAACTGTAATTAATATACGATCGTCAGGAATTACTTTAgatcgactacctttatttgtttgatctgtagttatt	Aedes aegypti voucher ISPI-2.1-5 cytochrome oxidase subunit 1 (COI) gene, partial cds; mitochondrial
HQ991720	658	species	7159	Aedes aegypti	7158	Aedes	7157	Culicidae	2759	Eukaryota	D	GGGGCAGGAACTGGGTGAAC	0	GATCAAACAAATAAAGGTAGTCGATC	1	154	agtagaaaatggggcaggaactgggtgaacAGTTTATCCTCCTCTCTCTTCAGGAACAGCTCATGCTGGAGCTTCTGTTGATTTAGCTATTTTTTCTCTTCATTTAGCTGGAATTTCCTCAATTTTAGGGGCAGTAAATTTTATTACAACTGTAATTAATATACGATCGTCAGGAATTACTTTAgatcgactacctttatttgtttgatctgtagttatt	Aedes aegypti voucher ISPI-2.1-4 cytochrome oxidase subunit 1 (COI) gene, partial cds; mitochondrial
HQ991719	658	species	7159	Aedes aegypti	7158	Aedes	7157	Culicidae	2759	Eukaryota	D	GGGGCAGGAACTGGGTGAAC	0	GATCAAACAAATAAAGGTAGTCGATC	1	154	agtagaaaatggggcaggaactgggtgaacAGTTTATCCTCCTCTCTCTTCAGGAACAGCTCATGCTGGAGCTTCTGTTGATTTAGCTATTTTTTCTCTTCATTTAGCTGGAATTTCCTCAATTTTAGGGGCAGTAAATTTTATTACAACTGTAATTAATATACGATCGTCAGGAATTACTTTAgatcgactacctttatttgtttgatctgtagttatt	Aedes aegypti voucher ISPI-2.1-3 cytochrome oxidase subunit 1 (COI) gene, partial cds; mitochondrial
HQ991718	658	species	7159	Aedes aegypti	7158	Aedes	7157	Culicidae	2759	Eukaryota	D	GGGGCAGGAACTGGGTGAAC	0	GATCAAACAAATAAAGGTAGTCGATC	1	154	agtagaaaatggggcaggaactgggtgaacAGTTTATCCTCCTCTCTCTTCAGGAACAGCTCATGCTGGAGCTTCTGTTGATTTAGCTATTTTTTCTCTTCATTTAGCTGGAATTTCCTCAATTTTAGGGGCAGTAAATTTTATTACAACTGTAATTAATATACGATCGTCAGGAATTACTTTAgatcgactacctttatttgtttgatctgtagttatt	Aedes aegypti voucher ISPI-2.1-2 cytochrome oxidase subunit 1 (COI) gene, partial cds; mitochondrial
JN303088	658	species	329103	Ochlerotatus excrucians	190765	Ochlerotatus	7157	Culicidae	2759	Eukaryota	D	GGATCAGGGACAGGATGAAC	0	GATCACACAAATAAGGGTAATCGGTC	3	154	agtcgaaaatggatcagggacaggatgaacTGTATATCCACCACTTTCATCAGGAACTGCTCATGCTGGAGCCTCAGTAGATTTAACAATTTTCTCTCTTCATTTAGCTGGTGTATCCTCAATTTTAGGGGCAGTAAATTTCATTACTACTGTTATTAATATGCGATCTGCAGGAATTACTTTAgaccgattacccttatttgtgtgatctgttgtaatt	Ochlerotatus excrucians voucher BIOUG<CAN>:10PROBE-14492 cytochrome oxidase subunit 1 (COI) gene, partial cds; mitochondrial
JN303087	658	species	329100	Ochlerotatus abserratus	190765	Ochlerotatus	7157	Culicidae	2759	Eukaryota	D	GGGTCAGGGACAGGTTGAAC	0	GATCATACAAATAAAGGTAATCGATC	0	154	ggttgaaaatgggtcagggacaggttgaacGGTGTACCCACCTCTTTCTTCTGGAACTGCCCATGCAGGAGCTTCAGTTGATTTAACAATTTTTTCTCTTCATTTAGCGGGGATCTCTTCAATTTTAGGAGCAGTAAATTTTATTACTACTGTTATTAATATGCGATCTTCAGGGATTACATTAgatcgattacctttatttgtatgatccgttgtaatt	Ochlerotatus abserratus voucher BIOUG<CAN>:10PROBE-15954 cytochrome oxidase subunit 1 (COI) gene, partial cds; mitochondrial
JN303086	658	species	329103	Ochlerotatus excrucians	190765	Ochlerotatus	7157	Culicidae	2759	Eukaryota	D	GGATCAGGGACAGGATGAAC	0	GATCACACAAATAAGGGTAATCGGTC	3	154	agtcgaaaatggatcagggacaggatgaacTGTATATCCACCACTTTCATCAGGAACTGCTCATGCTGGAGCCTCAGTAGATTTAACAATTTTCTCTCTTCATTTAGCTGGTGTATCCTCAATTTTAGGGGCAGTAAATTTCATTACTACTGTTATTAATATACGATCTGCAGGAATTACTTTAgaccgattacccttatttgtgtgatctgttgtaatt	Ochlerotatus excrucians voucher BIOUG<CAN>:10PROBE-15952 cytochrome oxidase subunit 1 (COI) gene, partial cds; mitochondrial
JN303031	658	species	329103	Ochlerotatus excrucians	190765	Ochlerotatus	7157	Culicidae	2759	Eukaryota	D	GGATCAGGGACAGGATGAAC	0	GATCACACAAATAAGGGTAATCGGTC	3	154	agtcgaaaatggatcagggacaggatgaacTGTATATCCACCACTTTCATCAGGAACTGCTCATGCTGGAGCCTCAGTAGATTTAACAATTTTCTCTCTTCATTTAGCTGGTGTATCCTCAATTTTAGGGGCAGTAAATTTCATTACTACTGTTATTAATATACGATCTGCAGGAATTACTTTAgaccgattacccttatttgtgtgatctgttgtaatt	Ochlerotatus excrucians voucher BIOUG<CAN>:10PROBE-15890 cytochrome oxidase subunit 1 (COI) gene, partial cds; mitochondrial
JN303030	658	species	329103	Ochlerotatus excrucians	190765	Ochlerotatus	7157	Culicidae	2759	Eukaryota	D	GGATCAGGGACAGGATGAAC	0	GATCACACAAATAAGGGTAATCGGTC	3	154	agtcgaaaatggatcagggacaggatgaacTGTATATCCACCACTTTCATCAGGAACTGCTCATGCTGGAGCCTCAGTAGATTTAACAATTTTCTCTCTTCATTTAGCTGGTGTATCCTCAATTTTAGGGGCAGTAAATTTCATTACTACTGTTATTAATATACGATCTGCAGGAATTACTTTAgaccgattacccttatttgtgtgatctgttgtaatt	Ochlerotatus excrucians voucher BIOUG<CAN>:10PROBE-15889 cytochrome oxidase subunit 1 (COI) gene, partial cds; mitochondrial
JN302966	658	species	329100	Ochlerotatus abserratus	190765	Ochlerotatus	7157	Culicidae	2759	Eukaryota	D	GGGTCAGGGACAGGTTGAAC	0	GATCATACAAATAAAGGTAATCGATC	0	154	ggttgaaaatgggtcagggacaggttgaacGGTGTACCCACCTCTTTCTTCTGGAACTGCCCATGCAGGAGCTTCAGTTGATTTAACAATTTTTTCTCTTCATTTAGCGGGGATCTCTTCAATTTTAGGAGCAGTAAATTTTATTACTACTGTTATTAATATGCGATCTTCAGGGATTACATTAgatcgattacctttatttgtatgatccgttgtaatt	Ochlerotatus abserratus voucher BIOUG<CAN>:10PROBE-15802 cytochrome oxidase subunit 1 (COI) gene, partial cds; mitochondrial
JN302965	658	species	329103	Ochlerotatus excrucians	190765	Ochlerotatus	7157	Culicidae	2759	Eukaryota	D	GGATCAGGGACAGGATGAAC	0	GATCACACAAATAAGGGTAATCGGTC	3	154	agtcgaaaatggatcagggacaggatgaacTGTATATCCACCACTTTCATCAGGAACTGCTCATGCTGGAGCCTCAGTAGATTTAACAATTTTCTCTCTTCATTTAGCTGGTGTATCCTCAATTTTAGGGGCAGTAAATTTCATTACTACTGTTATTAATATACGATCTGCAGGAATTACTTTAgaccgattacccttatttgtgtgatctgttgtaatt	Ochlerotatus excrucians voucher BIOUG<CAN>:10PROBE-15801 cytochrome oxidase subunit 1 (COI) gene, partial cds; mitochondrial
JN302964	658	species	329103	Ochlerotatus excrucians	190765	Ochlerotatus	7157	Culicidae	2759	Eukaryota	D	GGATCAGGGACAGGGTGAAC	0	GATCATACAAATAAGGGTAATCGGTC	2	154	agtcgaaaatggatcagggacagggtgaacTGTATACCCACCACTTTCATCAGGAACTGCTCATGCTGGAGCCTCAGTAGATTTAACAATTTTCTCTCTTCATTTAGCTGGTGTATCCTCAATTTTAGGAGCAGTAAATTTCATTACTACTGTTATTAATATACGATCTGCAGGAATTACTTTAgaccgattacccttatttgtatgatctgttgtaatt	Ochlerotatus excrucians voucher BIOUG<CAN>:10PROBE-15800 cytochrome oxidase subunit 1 (COI) gene, partial cds; mitochondrial
JN302919	658	species	329103	Ochlerotatus excrucians	190765	Ochlerotatus	7157	Culicidae	2759	Eukaryota	D	GGGTCAGGGACAGGATGAAC	0	GATCACACAAATAAGGGTAATCGGTC	3	154	agtcgaaaatgggtcagggacaggatgaacTGTATATCCACCACTTTCATCAGGAACTGCTCATGCTGGAGCCTCAGTAGATTTAACAATTTTCTCTCTTCATTTAGCTGGTGTATCCTCAATTTTAGGGGCAGTAAATTTCATTACTACTGTTATTAATATACGATCTGCAGGAATTACTTTAgaccgattacccttatttgtgtgatctgttgtaatt	Ochlerotatus excrucians voucher BIOUG<CAN>:10PROBE-15737 cytochrome oxidase subunit 1 (COI) gene, partial cds; mitochondrial
JN302917	658	species	329103	Ochlerotatus excrucians	190765	Ochlerotatus	7157	Culicidae	2759	Eukaryota	D	GGATCAGGGACAGGATGAAC	0	GATCACACAAATAAGGGTAATCGGTC	3	154	agtcgaaaatggatcagggacaggatgaacTGTATATCCACCACTTTCATCAGGAACTGCTCATGCTGGAGCCTCAGTAGATTTAACAATTTTCTCTCTTCATTTAGCTGGTGTATCCTCAATTTTAGGGGCAGTAAATTTCATTACTACTGTTATTAATATACGATCTGCAGGAATTACTTTAgaccgattacccttatttgtgtgatctgttgtaatt	Ochlerotatus excrucians voucher BIOUG<CAN>:10PROBE-15735 cytochrome oxidase subunit 1 (COI) gene, partial cds; mitochondrial
JN302861	658	species	329103	Ochlerotatus excrucians	190765	Ochlerotatus	7157	Culicidae	2759	Eukaryota	D	GGATCAGGGACAGGATGAAC	0	GATCACACAAATAAGGGTAATCGGTC	3	154	agtcgaaaatggatcagggacaggatgaacTGTATATCCACCACTTTCATCAGGAACTGCTCATGCTGGAGCCTCAGTAGATTTAACAATTTTCTCTCTTCATTTAGCTGGTGTATCCTCAATTTTAGGGGCAGTAAATTTTATTACTACTGTTATTAATATACGATCTGCAGGAATTACTTTAgaccgattacccttatttgtgtgatctgttgtaatt	Ochlerotatus excrucians voucher BIOUG<CAN>:10PROBE-15655 cytochrome oxidase subunit 1 (COI) gene, partial cds; mitochondrial
JN302859	621	species	743691	Ochlerotatus fitchii	190765	Ochlerotatus	7157	Culicidae	2759	Eukaryota	D	GGTTCAGGAACAGGATGAAC	1	GATCATACAAATAAAGGTAATCGATC	0	154	agtagaaaatggttcaggaacaggatgaacAGTTTATCCTCCTCTTTCTTCTGGAACTGCTCATGCTGGAGCTTCAGTTGATTTAACTATTTTTTCTCTTCATTTAGCCGGAGTATCTTCAATTTTAGGAGCTGTAAATTTTATTACTACTGTTATTAATATACGATCTTCAGGAATTACTTTAgatcgattacctttatttgtatgatctgttgtaatt	Ochlerotatus fitchii voucher BIOUG<CAN>:10PROBE-15654 cytochrome oxidase subunit 1 (COI) gene, partial cds; mitochondrial
JN302727	658	species	329103	Ochlerotatus excrucians	190765	Ochlerotatus	7157	Culicidae	2759	Eukaryota	D	GGATCAGGGACAGGATGAAC	0	GATCACACAAATAAGGGTAATCGGTC	3	154	agtcgaaaatggatcagggacaggatgaacTGTATATCCACCACTTTCATCAGGAACTGCTCATGCTGGAGCCTCAGTAGATTTAACAATTTTCTCTCTTCATTTAGCTGGTGTATCCTCAATTTTAGGAGCAGTAAATTTCATTACTACTGTTATTAATATACGATCTGCAGGAATTACTTTAgaccgattacccttatttgtgtgatctgttgtaatt	Ochlerotatus excrucians voucher BIOUG<CAN>:10PROBE-15478 cytochrome oxidase subunit 1 (COI) gene, partial cds; mitochondrial
JN302726	658	species	329103	Ochlerotatus excrucians	190765	Ochlerotatus	7157	Culicidae	2759	Eukaryota	D	GGATCAGGGACAGGATGAAC	0	GATCACACAAATAAGGGTAATCGGTC	3	154	agtcgaaaatggatcagggacaggatgaacTGTATATCCACCACTTTCATCAGGAACTGCTCATGCTGGAGCCTCAGTAGATTTAACAATTTTCTCTCTTCATTTAGCTGGTGTATCCTCAATTTTAGGGGCAGTAAATTTCATTACTACTGTTATTAATATACGATCTGCAGGAATTACTTTAgaccgattacccttatttgtgtgatctgttgtaatt	Ochlerotatus excrucians voucher BIOUG<CAN>:10PROBE-15477 cytochrome oxidase subunit 1 (COI) gene, partial cds; mitochondrial
JN302725	658	species	329103	Ochlerotatus excrucians	190765	Ochlerotatus	7157	Culicidae	2759	Eukaryota	D	GGATCAGGGACAGGATGAAC	0	GATCACACAAATAAGGGTAATCGGTC	3	154	agtcgaaaatggatcagggacaggatgaacTGTATATCCACCACTTTCATCAGGAACTGCTCATGCTGGAGCCTCAGTAGATTTAACAATTTTCTCTCTTCATTTAGCTGGTGTATCCTCAATTTTAGGGGCAGTAAATTTCATTACTACTGTTATTAATATACGATCTGCAGGAATTACTTTAgaccgattacccttatttgtgtgatctgttgtaatt	Ochlerotatus excrucians voucher BIOUG<CAN>:10PROBE-15476 cytochrome oxidase subunit 1 (COI) gene, partial cds; mitochondrial
JN302543	658	species	329100	Ochlerotatus abserratus	190765	Ochlerotatus	7157	Culicidae	2759	Eukaryota	D	GGGTCAGGGACAGGTTGAAC	0	GATCATACAAATAAAGGTAATCGATC	0	154	ggttgaaaatgggtcagggacaggttgaacGGTGTACCCACCTCTTTCTTCTGGAACTGCCCATGCAGGAGCTTCAGTTGATTTAACAATTTTTTCTCTTCATTTAGCGGGGATCTCTTCAATTTTAGGAGCAGTAAATTTTATTACTACTGTTATTAATATGCGATCTTCAGGGATTACATTAgatcgattacctttatttgtatgatccgttgtaatt	Ochlerotatus abserratus voucher BIOUG<CAN>:10PROBE-14058 cytochrome oxidase subunit 1 (COI) gene, partial cds; mitochondrial
JN302389	658	species	49923	Anopheles walkeri	7164	Anopheles	7157	Culicidae	2759	Eukaryota	D	GGGGCAGGTACAGGATGAAC	0	GATCAAACAAATAAAGGTATTCGGTC	1	154	agtagaaaatggggcaggtacaggatgaacAGTTTATCCTCCTTTATCTTCAGGAATTGCTCACGCAGGGGCTTCTGTAGATTTAGCTATTTTTTCTCTTCACTTAGCTGGAATTTCTTCTATTTTAGGGGCTGTAAATTTTATTACTACAGTTATTAATATACGATCTCCTGGGATTACTTTAgaccgaatacctttatttgtttgatcggtggtaatt	Anopheles walkeri voucher BIOUG<CAN>:10JSROW-1674 cytochrome oxidase subunit 1 (COI) gene, partial cds; mitochondrial
JN302378	658	species	7163	Aedes vexans	7158	Aedes	7157	Culicidae	2759	Eukaryota	D	GGAGCAGGGACAGGATGAAC	0	GATCAAACAAATAAAGGTAATCGATC	0	154	agtagaaaatggagcagggacaggatgaacAGTTTATCCTCCTCTTTCATCAGGAACAGCTCACGCTGGAGCTTCTGTTGATTTAGCAATTTTCTCTCTTCATTTAGCAGGGATTTCATCTATTTTAGGAGCAGTAAATTTTATTACTACTGTTATTAATATACGATCATCTGGGATTACTTTAgatcgattacctttatttgtttgatctgtagtaatt	Aedes vexans voucher BIOUG<CAN>:10JSROW-1663 cytochrome oxidase subunit 1 (COI) gene, partial cds; mitochondrial
JN301652	658	species	743693	Ochlerotatus provocans	190765	Ochlerotatus	7157	Culicidae	2759	Eukaryota	D	GGATCTGGGACAGGATGAAC	0	GATCAAACAAATAAAGGTAATCGATC	0	154	agtagaaaatggatctgggacaggatgaacAGTTTATCCTCCTCTATCTTCAGGAACTGCTCATGCTGGAGCTTCTGTTGATTTAACAATTTTTTCTCTTCATTTAGCAGGAGTATCTTCTATTTTAGGAGCAGTAAATTTTATTACTACTGTAATTAATATACGATCTTCAGGAATTACTTTAgatcgattacctttatttgtttgatctgttgtaatt	Ochlerotatus provocans voucher BIOUG<CAN>:10JSROW-0443 cytochrome oxidase subunit 1 (COI) gene, partial cds; mitochondrial
JF878216	658	species	329103	Ochlerotatus excrucians	190765	Ochlerotatus	7157	Culicidae	2759	Eukaryota	D	GGATCAGGGACAGGATGAAC	0	GATCACACAAATAAGGGTAATCGGTC	3	154	agtcgaaaatggatcagggacaggatgaacTGTATATCCACCACTTTCATCAGGAACTGCTCATGCTGGAGCCTCAGTAGATTTAACAATTTTCTCTCTTCATTTAGCTGGTGTATCCTCAATTTTAGGGGCAGTAAATTTCATTACTACTGTTATTAATATACGATCTGCAGGAATTACTTTAgaccgattacccttatttgtgtgatctgttgtaatt	Ochlerotatus excrucians voucher BIOUG<CAN>:10PROBE-16535 cytochrome oxidase subunit 1 (COI) gene, partial cds; mitochondrial
JF878215	658	species	329103	Ochlerotatus excrucians	190765	Ochlerotatus	7157	Culicidae	2759	Eukaryota	D	GGATCAGGGACAGGATGAAC	0	GATCACACAAATAAGGGTAATCGGTC	3	154	agtcgaaaatggatcagggacaggatgaacTGTATATCCACCACTTTCATCAGGAACTGCTCATGCTGGAGCCTCAGTAGATTTAACAATTTTCTCTCTTCATTTAGCTGGTGTATCCTCAATTTTAGGGGCAGTAAATTTCATTACTACTGTTATTAATATACGATCTGCAGGAATTACTTTAgaccgattacccttatttgtgtgatctgttgtaatt	Ochlerotatus excrucians voucher BIOUG<CAN>:10PROBE-16534 cytochrome oxidase subunit 1 (COI) gene, partial cds; mitochondrial
JF878151	658	species	329103	Ochlerotatus excrucians	190765	Ochlerotatus	7157	Culicidae	2759	Eukaryota	D	GGATCAGGGACAGGATGAAC	0	GATCACACAAATAAGGGTAATCGGTC	3	154	agtcgaaaatggatcagggacaggatgaacTGTATATCCACCACTTTCATCAGGAACTGCTCATGCTGGAGCCTCAGTAGATTTAACAATTTTCTCTCTTCATTTAGCTGGTGTATCCTCAATTTTAGGGGCAGTAAATTTCATTACTACTGTTATTAATATACGATCTGCAGGAATTACTTTAgaccgattacccttatttgtgtgatctgttgtaatt	Ochlerotatus excrucians voucher BIOUG<CAN>:10PROBE-16176 cytochrome oxidase subunit 1 (COI) gene, partial cds; mitochondrial
JF878144	658	species	329103	Ochlerotatus excrucians	190765	Ochlerotatus	7157	Culicidae	2759	Eukaryota	D	GGATCAGGGACAGGATGAAC	0	GATCACACAAATAAGGGTAATCGGTC	3	154	agtcgaaaatggatcagggacaggatgaacTGTATATCCACCACTTTCATCAGGAACTGCTCATGCTGGAGCCTCAGTAGATTTAACAATTTTCTCTCTTCATTTAGCTGGTGTATCCTCAATTTTAGGGGCAGTAAATTTCATTACTACTGTTATTAATATACGATCTGCAGGAATTACTTTAgaccgattacccttatttgtgtgatctgttgtaatt	Ochlerotatus excrucians voucher BIOUG<CAN>:10PROBE-16168 cytochrome oxidase subunit 1 (COI) gene, partial cds; mitochondrial
JF878029	658	species	329099	Ochlerotatus communis	190765	Ochlerotatus	7157	Culicidae	2759	Eukaryota	D	GGATCAGGAACAGGATGAAC	0	GATCAAACAAATAAAGGTAATCGATC	0	154	ggttgaaaatggatcaggaacaggatgaacTGTGTACCCACCTCTTTCTTCTGGAACTGCTCACGCAGGAGCTTCAGTTGATTTAACAATTTTTTCTCTTCATTTAGCAGGAATTTCATCAATTTTAGGAGCAGTAAATTTTATTACTACTGTTATTAATATACGATCTTCAGGAATTACATTAgatcgattacctttatttgtttgatctgttgtaatt	Ochlerotatus communis voucher BIOUG<CAN>:10PROBE-14887 cytochrome oxidase subunit 1 (COI) gene, partial cds; mitochondrial
JF877882	658	species	329103	Ochlerotatus excrucians	190765	Ochlerotatus	7157	Culicidae	2759	Eukaryota	D	GGATCAGGGACAGGATGAAC	0	GATCACACAAATAAGGGTAATCGGTC	3	154	agtcgaaaatggatcagggacaggatgaacTGTATATCCACCACTTTCATCAGGAACTGCTCATGCTGGAGCCTCAGTAGATTTAACAATTTTCTCTCTTCATTTAGCTGGTGTATCCTCAATTTTAGGGGCAGTAAATTTCATTACTACTGTTATTAATATACGATCTGCAGGAATTACTTTAgaccgattacccttatttgtgtgatctgttgtaatt	Ochlerotatus excrucians voucher BIOUG<CAN>:10PROBE-14618 cytochrome oxidase subunit 1 (COI) gene, partial cds; mitochondrial
JF877777	658	species	329103	Ochlerotatus excrucians	190765	Ochlerotatus	7157	Culicidae	2759	Eukaryota	D	GGATCAGGGACAGGATGAAC	0	GATCACACAAATAAGGGTAATCGGTC	3	154	agtcgaaaatggatcagggacaggatgaacTGTATATCCACCACTTTCATCAGGAACTGCTCATGCTGGAGCCTCAGTAGATTTAACAATTTTCTCTCTTCATTTAGCTGGTGTATCCTCAATTTTAGGGGCAGTAAATTTCATTACTACTGTTATTAATATACGATCTGCAGGAATTACTTTAgaccgattacccttatttgtgtgatctgttgtaatt	Ochlerotatus excrucians voucher BIOUG<CAN>:10PROBE-14773 cytochrome oxidase subunit 1 (COI) gene, partial cds; mitochondrial
JF877712	658	species	329103	Ochlerotatus excrucians	190765	Ochlerotatus	7157	Culicidae	2759	Eukaryota	D	GGATCAGGGACAGGATGAAC	0	GATCATACAAATAAGGGTAATCGGTC	2	154	agtcgaaaatggatcagggacaggatgaacTGTATATCCACCACTTTCATCAGGAACTGCTCATGCTGGAGCCTCAGTAGATTTAACAATTTTCTCTCTTCATTTAGCTGGTGTATCCTCAATTTTAGGAGCAGTAAATTTCATTACTACTGTTATTAATATACGATCTGCAGGAATTACTTTAgaccgattacccttatttgtatgatctgttgtaatt	Ochlerotatus excrucians voucher BIOUG<CAN>:10PROBE-14389 cytochrome oxidase subunit 1 (COI) gene, partial cds; mitochondrial
JF877711	658	species	329100	Ochlerotatus abserratus	190765	Ochlerotatus	7157	Culicidae	2759	Eukaryota	D	GGGTCAGGGACAGGTTGAAC	0	GATCATACAAATAAAGGTAATCGATC	0	154	ggttgaaaatgggtcagggacaggttgaacGGTGTACCCACCTCTTTCTTCTGGAACTGCCCATGCAGGAGCTTCAGTTGATTTAACAATTTTTTCTCTTCATTTAGCGGGGATCTCTTCAATTTTAGGAGCAGTAAATTTTATTACTACTGTTATTAATATGCGATCTTCAGGGATTACATTAgatcgattacctttatttgtatgatccgttgtaatt	Ochlerotatus abserratus voucher BIOUG<CAN>:10PROBE-14388 cytochrome oxidase subunit 1 (COI) gene, partial cds; mitochondrial
JF877710	658	species	329103	Ochlerotatus excrucians	190765	Ochlerotatus	7157	Culicidae	2759	Eukaryota	D	GGATCGGGGACAGGATGAAC	1	GATCACACAAATAAGGGTAATCGGTC	3	154	agtcgaaaatggatcggggacaggatgaacTGTATATCCACCACTTTCATCAGGAACTGCCCATGCTGGAGCCTCAGTAGATTTAACAATTTTCTCTCTTCATTTAGCTGGTGTATCCTCAATTTTAGGGGCAGTAAATTTCATTACTACTGTTATTAATATACGATCTGCAGGAATTACTTTAgaccgattacccttatttgtgtgatctgttgtaatt	Ochlerotatus excrucians voucher BIOUG<CAN>:10PROBE-14387 cytochrome oxidase subunit 1 (COI) gene, partial cds; mitochondrial
JF877662	658	species	329099	Ochlerotatus communis	190765	Ochlerotatus	7157	Culicidae	2759	Eukaryota	D	GGATCAGGAACAGGATGAAC	0	GATCAAACAAATAAAGGTAATCGATC	0	154	ggttgaaaatggatcaggaacaggatgaacTGTGTACCCACCTCTTTCTTCTGGAACTGCTCACGCAGGAGCTTCAGTTGATTTAACAATTTTTTCTCTTCATTTAGCAGGAATTTCATCAATTTTAGGAGCAGTAAATTTTATTACTACTGTTATTAATATACGATCTTCAGGAATTACATTAgatcgattacctttatttgtttgatctgttgtaatt	Ochlerotatus communis voucher BIOUG<CAN>:10PROBE-14330 cytochrome oxidase subunit 1 (COI) gene, partial cds; mitochondrial
JF877661	658	species	329103	Ochlerotatus excrucians	190765	Ochlerotatus	7157	Culicidae	2759	Eukaryota	D	GGATCAGGGACAGGATGAAC	0	GATCACACAAATAAGGGTAATCGGTC	3	154	agtcgaaantggatcagggacaggatgaacTGTATATCCACCACTTTCATCAGGAACTGCTCATGCTGGAGCCTCAGTAGATTTAACAATTTTCTCTCTTCATTTAGCTGGTGTATCCTCAATTTTAGGGGCAGTAAATTTCATTACTACTGTTATTAATATACGATCTGCAGGAATTACTTTAgaccgattacccttatttgtgtgatctgttgtaatt	Ochlerotatus excrucians voucher BIOUG<CAN>:10PROBE-14329 cytochrome oxidase subunit 1 (COI) gene, partial cds; mitochondrial
JF877660	658	species	329103	Ochlerotatus excrucians	190765	Ochlerotatus	7157	Culicidae	2759	Eukaryota	D	GGATCAGGGACAGGATGAAC	0	GATCACACAAATAAGGGTAATCGGTC	3	154	agtcgaaaatggatcagggacaggatgaacTGTATATCCACCACTTTCATCAGGAACTGCTCATGCTGGAGCCTCAGTAGATTTAACAATTTTCTCTCTTCATTTAGCTGGTGTATCCTCAATTTTAGGGGCAGTAAATTTCATTACTACTATTATTAATATACGATCTGCAGGAATTACTTTAgaccgattacccttatttgtgtgatctgttgtaatt	Ochlerotatus excrucians voucher BIOUG<CAN>:10PROBE-14328 cytochrome oxidase subunit 1 (COI) gene, partial cds; mitochondrial
JF877536	658	species	329103	Ochlerotatus excrucians	190765	Ochlerotatus	7157	Culicidae	2759	Eukaryota	D	GGGTCAGGGACAGGATGAAC	0	GATCACACAAATAAGGGTAATCGGTC	3	154	agtcgaaaatgggtcagggacaggatgaacTGTATATCCACCACTTTCATCAGGAACTGCTCATGCTGGAGCCTCAGTAGATTTAACAATTTTCTCTCTTCATTTAGCTGGTGTATCCTCAATTTTAGGGGCAGTAAATTTCATTACTACTGTTATTAATATACGATCTGCAGGAATTACTTTAgaccgattacccttatttgtgtgatctgttgtaatt	Ochlerotatus excrucians voucher BIOUG<CAN>:10PROBE-13909 cytochrome oxidase subunit 1 (COI) gene, partial cds; mitochondrial
JF877428	658	species	329100	Ochlerotatus abserratus	190765	Ochlerotatus	7157	Culicidae	2759	Eukaryota	D	GGGTCAGGGACAGGTTGAAC	0	GATCATACAAATAAAGGTAATCGATC	0	154	ggttgaaaatgggtcagggacaggttgaacGGTGTACCCACCTCTTTCTTCTGGAACTGCCCATGCAGGAGCTTCAGTTGATTTAACAATTTTTTCTCTTCATTTAGCGGGGATCTCTTCAATTTTAGGAGCAGTAAATTTTATTACTACTGTTATTAATATGCGATCTTCAGGGATTACATTAgatcgattacctttatttgtatgatccgttgtaatt	Ochlerotatus abserratus voucher BIOUG<CAN>:10PROBE-13763 cytochrome oxidase subunit 1 (COI) gene, partial cds; mitochondrial
JF877349	658	species	329100	Ochlerotatus abserratus	190765	Ochlerotatus	7157	Culicidae	2759	Eukaryota	D	GGGTCAGGGACAGGTTGAAC	0	GATCATACAAATAAAGGTAATCGATC	0	154	ggttgaaaatgggtcagggacaggttgaacGGTGTACCCACCTCTTTCTTCTGGAACTGCCCATGCAGGAGCTTCAGTTGATTTAACAATTTTTTCTCTTCATTTAGCGGGGATCTCTTCAATTTTAGGAGCAGTAAATTTTATTACTACTGTTATTAATATGCGATCTTCAGGGATTACATTAgatcgattacctttatttgtatgatccgttgtaatt	Ochlerotatus abserratus voucher BIOUG<CAN>:10PROBE-13672 cytochrome oxidase subunit 1 (COI) gene, partial cds; mitochondrial
JF877345	658	species	329103	Ochlerotatus excrucians	190765	Ochlerotatus	7157	Culicidae	2759	Eukaryota	D	GGATCAGGGACAGGATGAAC	0	GATCACACAAATAAGGGTAATCGGTC	3	154	agtcgaaaatggatcagggacaggatgaacTGTATATCCACCACTTTCATCAGGAACTGCTCATGCTGGAGCCTCAGTAGATTTAACAATTTTCTCTCTTCATTTAGCTGGTGTATCCTCAATTTTAGGGGCAGTAAATTTCATTACTACTGTTATTAATATACGATCTGCAGGAATTACTTTAgaccgattacccttatttgtgtgatctgttgtaatt	Ochlerotatus excrucians voucher BIOUG<CAN>:10PROBE-13664 cytochrome oxidase subunit 1 (COI) gene, partial cds; mitochondrial
JF877344	658	species	329100	Ochlerotatus abserratus	190765	Ochlerotatus	7157	Culicidae	2759	Eukaryota	D	GGGTCAGGGACAGGTTGAAC	0	GATCATACAAATAAAGGTAATCGATC	0	154	ggttgaaaatgggtcagggacaggttgaacGGTGTACCCACCTCTTTCTTCTGGAACTGCCCATGCAGGAGCTTCAGTTGATTTAACAATTTTTTCTCTTCATTTAGCGGGGATCTCTTCAATTTTAGGAGCAGTAAATTTTATTACTACTGTTATTAATATGCGATCTTCAGGGATTACATTAgatcgattacctttatttgtatgatccgttgtaatt	Ochlerotatus abserratus voucher BIOUG<CAN>:10PROBE-13663 cytochrome oxidase subunit 1 (COI) gene, partial cds; mitochondrial
JF877262	658	species	329103	Ochlerotatus excrucians	190765	Ochlerotatus	7157	Culicidae	2759	Eukaryota	D	GGATCAGGGACAGGATGAAC	0	GATCACACAAATAAGGGTAATCGGTC	3	154	agtcgaaaatggatcagggacaggatgaacTGTATATCCACCACTTTCATCAGGAACTGCTCATGCTGGAGCCTCAGTAGATTTAACAATTTTCTCTCTTCATTTAGCTGGTGTATCCTCAATTTTAGGGGCAGTAAATTTTATTACTACTGTTATTAATATACGATCTGCAGGAATTACTTTAgaccgattacccttatttgtgtgatctgttgtaatt	Ochlerotatus excrucians voucher BIOUG<CAN>:10PROBE-13463 cytochrome oxidase subunit 1 (COI) gene, partial cds; mitochondrial
JF877261	620	species	329103	Ochlerotatus excrucians	190765	Ochlerotatus	7157	Culicidae	2759	Eukaryota	D	GGGTCAGGGACAGGATGAAC	0	GATCACACAAATAAGGGTAATCGGTC	3	154	agtcgaaaatgggtcagggacaggatgaacTGTATATCCACCACTTTCATCAGGAACTGCTCATGCTGGAGCCTCAGTAGATTTAACAATTTTCTCTCTTCATTTAGCTGGTGTATCCTCAATTTTAGGGGCAGTAAATTTCATTACTACTGTTATTAATATACGATCTGCAGGAATTACTTTAgaccgattacccttatttgtgtgatctgttgtaatt	Ochlerotatus excrucians voucher BIOUG<CAN>:10PROBE-13462 cytochrome oxidase subunit 1 (COI) gene, partial cds; mitochondrial
JF877223	658	species	329103	Ochlerotatus excrucians	190765	Ochlerotatus	7157	Culicidae	2759	Eukaryota	D	GGATCAGGGACAGGATGAAC	0	GATCACACAAATAAGGGTAATCGGTC	3	154	agtcgaaaatggatcagggacaggatgaacTGTATATCCACCACTTTCATCAGGAACTGCTCATGCTGGAGCCTCAGTAGATTTAACAATTTTCTCTCTTCATTTAGCTGGTGTATCCTCAATTTTAGGGGCAGTAAATTTCATTACTACTGTTATTAATATACGATCTGCAGGAATTACTTTAgaccgattacccttatttgtgtgatctgttgtaatt	Ochlerotatus excrucians voucher BIOUG<CAN>:10PROBE-13415 cytochrome oxidase subunit 1 (COI) gene, partial cds; mitochondrial
JF877222	658	species	329103	Ochlerotatus excrucians	190765	Ochlerotatus	7157	Culicidae	2759	Eukaryota	D	GGATCAGGGACAGGATGAAC	0	GATCACACAAATAAGGGTAATCGGTC	3	154	agtcgaaaatggatcagggacaggatgaacTGTATACCCACCACTTTCATCAGGAACTGCTCATGCTGGAGCCTCAGTAGATTTAACAATTTTCTCTCTTCATTTAGCTGGTGTATCCTCAATTTTAGGGGCAGTAAATTTCATTACTACTGTTATTAATATACGATCTGCAGGAATTACTTTAgaccgattacccttatttgtgtgatctgttgtaatt	Ochlerotatus excrucians voucher BIOUG<CAN>:10PROBE-13414 cytochrome oxidase subunit 1 (COI) gene, partial cds; mitochondrial
JF877221	658	species	329103	Ochlerotatus excrucians	190765	Ochlerotatus	7157	Culicidae	2759	Eukaryota	D	GGATCAGGGACAGGATGAAC	0	GATCACACAAATAAGGGTAATCGGTC	3	154	agtcgaaaatggatcagggacaggatgaacTGTATATCCACCACTTTCATCAGGAACTGCTCATGCTGGAGCCTCAGTAGATTTAACAATTTTCTCTCTTCATTTAGCTGGTGTATCCTCAATTTTAGGGGCAGTAAATTTCATTACTACTGTTATTAATATACGATCTGCAGGAATTACTTTAgaccgattacccttatttgtgtgatctgttgtaatt	Ochlerotatus excrucians voucher BIOUG<CAN>:10PROBE-13413 cytochrome oxidase subunit 1 (COI) gene, partial cds; mitochondrial
JF877184	658	species	329103	Ochlerotatus excrucians	190765	Ochlerotatus	7157	Culicidae	2759	Eukaryota	D	GGATCAGGGACAGGATGAAC	0	GATCACACAAATAAGGGTAATCGGTC	3	154	agtcgaaaatggatcagggacaggatgaacTGTATATCCACCACTTTCATCAGGAACTGCTCATGCTGGAGCCTCAGTAGATTTAACAATTTTCTCTCTTCATTTAGCTGGTGTATCCTCAATTTTAGGGGCAGTAAATTTCATTACTACTGTTATTAATATACGATCTGCAGGAATTACTTTAgaccgattacccttatttgtgtgatctgttgtaatt	Ochlerotatus excrucians voucher BIOUG<CAN>:10PROBE-13367 cytochrome oxidase subunit 1 (COI) gene, partial cds; mitochondrial
JF877142	658	species	329100	Ochlerotatus abserratus	190765	Ochlerotatus	7157	Culicidae	2759	Eukaryota	D	GGGTCAGGGACAGGTTGAAC	0	GATCATACAAATAAAGGTAATCGATC	0	154	ggttgaaaatgggtcagggacaggttgaacGGTGTACCCACCTCTTTCTTCTGGAACTGCCCATGCAGGAGCTTCAGTTGATTTAACAATTTTTTCTCTTCATTTAGCGGGGATCTCTTCAATTTTAGGAGCAGTAAATTTTATTACTACTGTTATTAATATGCGATCTTCAGGGATTACATTAgatcgattacctttatttgtatgatccgttgtaatt	Ochlerotatus abserratus voucher BIOUG<CAN>:10PROBE-13304 cytochrome oxidase subunit 1 (COI) gene, partial cds; mitochondrial
JF877053	658	species	329100	Ochlerotatus abserratus	190765	Ochlerotatus	7157	Culicidae	2759	Eukaryota	D	GGGTCAGGGACAGGTTGAAC	0	GATCATACAAATAAAGGTAATCGATC	0	154	ggttgaaaatgggtcagggacaggttgaacGGTGTACCCACCTCTTTCTTCTGGAACTGCCCATGCAGGAGCTTCAGTTGATTTAACAATTTTTTCTCTTCATTTAGCGGGGATCTCTTCAATTTTAGGAGCAGTAAATTTTATTACTACTGTTATTAATATGCGATCTTCAGGGATTACATTAgatcgattacctttatttgtatgatccgttgtaatt	Ochlerotatus abserratus voucher BIOUG<CAN>:10PROBE-13095 cytochrome oxidase subunit 1 (COI) gene, partial cds; mitochondrial
JF877035	658	species	329100	Ochlerotatus abserratus	190765	Ochlerotatus	7157	Culicidae	2759	Eukaryota	D	GGGTCAGGGACAGGTTGAAC	0	GATCATACAAATAAAGGTAATCGATC	0	154	ggttgaaaatgggtcagggacaggttgaacGGTGTACCCACCTCTTTCTTCTGGAACTGCCCATGCAGGAGCTTCAGTTGATTTAACAATTTTTTCTCTTCATTTAGCGGGGATCTCTTCAATTTTAGGAGCAGTAAATTTTATTACTACTGTTATTAATATGCGATCTTCAGGGATTACATTAgatcgattacctttatttgtatgatccgttgtaatt	Ochlerotatus abserratus voucher BIOUG<CAN>:10PROBE-13070 cytochrome oxidase subunit 1 (COI) gene, partial cds; mitochondrial
JF876941	658	species	329103	Ochlerotatus excrucians	190765	Ochlerotatus	7157	Culicidae	2759	Eukaryota	D	GGATCAGGGACAGGATGAAC	0	GATCACACAAATAAGGGTAACCGGTC	4	154	agtcgaaaatggatcagggacaggatgaacTGTATATCCACCACTTTCATCAGGAACTGCTCATGCTGGAGCCTCAGTAGATTTAACAATTTTCTCTCTTCATTTAGCTGGTGTATCCTCAATTTTAGGGGCAGTAAATTTCATTACTACTGTTATTAATATACGATCTGCAGGAATTACTTTAgaccggttacccttatttgtgtgatctgttgtaatt	Ochlerotatus excrucians voucher BIOUG<CAN>:10PROBE-12943 cytochrome oxidase subunit 1 (COI) gene, partial cds; mitochondrial
JF876940	658	species	329100	Ochlerotatus abserratus	190765	Ochlerotatus	7157	Culicidae	2759	Eukaryota	D	GGGTCAGGGACAGGTTGAAC	0	GATCATACAAATAAAGGTAATCGATC	0	154	ggttgaaaatgggtcagggacaggttgaacGGTGTACCCACCTCTTTCTTCTGGAACTGCCCATGCAGGAGCTTCAGTTGATTTAACAATTTTTTCTCTTCATTTAGCGGGGATCTCTTCAATTTTAGGAGCAGTAAATTTTATTACTACTGTTATTAATATGCGATCTTCAGGGATTACATTAgatcgattacctttatttgtatgatccgttgtaatt	Ochlerotatus abserratus voucher BIOUG<CAN>:10PROBE-12942 cytochrome oxidase subunit 1 (COI) gene, partial cds; mitochondrial
JF876905	658	species	329103	Ochlerotatus excrucians	190765	Ochlerotatus	7157	Culicidae	2759	Eukaryota	D	GGATCAGGGACAGGATGAAC	0	GATCACACAAATAAGGGTAATCGGTC	3	154	agtcgaaaatggatcagggacaggatgaacTGTATATCCACCACTTTCATCAGGAACTGCTCATGCTGGAGCCTCAGTAGATTTAACAATTTTCTCTCTTCATTTAGCTGGTGTATCCTCAATTTTAGGGGCAGTAAATTTCATTACTACTGTTATTAATATACGATCTGCAGGAATTACTTTAgaccgattacccttatttgtgtgatctgttgtaatt	Ochlerotatus excrucians voucher BIOUG<CAN>:10PROBE-12900 cytochrome oxidase subunit 1 (COI) gene, partial cds; mitochondrial
JF876904	658	species	329103	Ochlerotatus excrucians	190765	Ochlerotatus	7157	Culicidae	2759	Eukaryota	D	GGATCAGGGACAGGATGAAC	0	GATCACACAAATAAGGGTAACCGGTC	4	154	agtcgaaaatggatcagggacaggatgaacTGTATATCCACCACTTTCATCAGGAACTGCTCATGCTGGAGCCTCAGTAGATTTAACAATTTTCTCTCTTCATTTAGCTGGTGTATCCTCAATTTTAGGGGCAGTAAATTTCATTACTACTGTTATTAATATACGATCTGCAGGAATTACTTTAgaccggttacccttatttgtgtgatctgttgtaatt	Ochlerotatus excrucians voucher BIOUG<CAN>:10PROBE-12899 cytochrome oxidase subunit 1 (COI) gene, partial cds; mitochondrial
JF876823	658	species	329103	Ochlerotatus excrucians	190765	Ochlerotatus	7157	Culicidae	2759	Eukaryota	D	GGATCAGGGACAGGATGAAC	0	GATCACACAAATAAGGGTAATCGGTC	3	154	agtcgaaaatggatcagggacaggatgaacTGTATATCCACCACTTTCATCAGGAACTGCTCATGCTGGAGCCTCAGTAGATTTAACAATTTTCTCTCTTCATTTAGCTGGTGTATCCTCAATTTTAGGGGCAGTAAATTTCATTACTACTGTTATTAATATACGATCTGCAGGAATTACTTTAgaccgattacccttatttgtgtgatctgttgtaatt	Ochlerotatus excrucians voucher BIOUG<CAN>:10PROBE-12764 cytochrome oxidase subunit 1 (COI) gene, partial cds; mitochondrial
JF876768	658	species	329103	Ochlerotatus excrucians	190765	Ochlerotatus	7157	Culicidae	2759	Eukaryota	D	GGATCAGGGACAGGATGAAC	0	GATCACACAAATAAGGGTAATCGGTC	3	154	agtcgaaaatggatcagggacaggatgaacTGTATATCCACCACTTTCATCAGGAACTGCTCATGCTGGAGCCTCAGTAGATTTAACAATTTTCTCTCTTCATTTAGCTGGTGTATCCTCAATTTTAGGGGCAGTAAATTTCATTACTACTGTTATTAATATACGATCTGCAGGAATTACTTTAgaccgattacccttatttgtgtgatctgttgtaatt	Ochlerotatus excrucians voucher BIOUG<CAN>:10PROBE-12692 cytochrome oxidase subunit 1 (COI) gene, partial cds; mitochondrial
JF876727	658	species	329103	Ochlerotatus excrucians	190765	Ochlerotatus	7157	Culicidae	2759	Eukaryota	D	GGATCAGGGACAGGATGAAC	0	GATCACACAAATAAGGGTAATCGGTC	3	154	agtcgaaaatggatcagggacaggatgaacTGTATATCCACCACTTTCATCAGGAACTGCTCATGCTGGAGCCTCAGTAGATTTAACAATTTTCTCTCTTCATTTAGCTGGTGTATCCTCAATTTTAGGGGCAGTAAATTTCATTACTACTGTTATTAATATACGATCTGCAGGAATTACTTTAgaccgattacccttatttgtgtgatctgttgtaatt	Ochlerotatus excrucians voucher BIOUG<CAN>:10PROBE-12646 cytochrome oxidase subunit 1 (COI) gene, partial cds; mitochondrial
JF876726	658	species	329100	Ochlerotatus abserratus	190765	Ochlerotatus	7157	Culicidae	2759	Eukaryota	D	GGGTCAGGGACAGGTTGAAC	0	GATCATACAAATAAAGGTAATCGATC	0	154	ggttgaaaatgggtcagggacaggttgaacGGTGTACCCACCTCTTTCTTCTGGAACTGCCCATGCAGGAGCTTCAGTTGATTTAACAATTTTTTCTCTTCATTTAGCGGGGATCTCTTCAATTTTAGGAGCAGTAAATTTTATTACTACTGTTATTAATATGCGATCTTCAGGGATTACATTAgatcgattacctttatttgtatgatccgttgtaatt	Ochlerotatus abserratus voucher BIOUG<CAN>:10PROBE-12645 cytochrome oxidase subunit 1 (COI) gene, partial cds; mitochondrial
JF876613	658	species	329103	Ochlerotatus excrucians	190765	Ochlerotatus	7157	Culicidae	2759	Eukaryota	D	GGGTCAGGGACAGGATGAAC	0	GATCACACAAATAAGGGTAATCGGTC	3	154	agtcgaaaatgggtcagggacaggatgaacTGTATATCCACCACTTTCATCAGGAACTGCTCATGCTGGAGCCTCAGTAGATTTAACAATTTTCTCTCTTCATTTAGCTGGTGTATCCTCAATTTTAGGGGCAGTAAATTTCATTACTACTGTTATTAATATACGATCTGCAGGAATTACTTTAgaccgattacccttatttgtgtgatctgttgtaatt	Ochlerotatus excrucians voucher BIOUG<CAN>:10PROBE-12471 cytochrome oxidase subunit 1 (COI) gene, partial cds; mitochondrial
JF876612	658	species	329103	Ochlerotatus excrucians	190765	Ochlerotatus	7157	Culicidae	2759	Eukaryota	D	GGATCAGGGACAGGATGAAC	0	GATCACACAAATAAGGGTAATCGGTC	3	154	agtcgaaaatggatcagggacaggatgaacTGTATATCCACCACTTTCATCAGGAACTGCTCATGCTGGAGCCTCAGTAGATTTAACAATTTTCTCTCTTCATTTAGCTGGTGTATCCTCAATTTTAGGGGCAGTAAATTTCATTACTACTGTTATTAATATACGATCTGCAGGAATTACTTTAgaccgattacccttatttgtgtgatctgttgtaatt	Ochlerotatus excrucians voucher BIOUG<CAN>:10PROBE-12470 cytochrome oxidase subunit 1 (COI) gene, partial cds; mitochondrial
JF876604	634	species	329103	Ochlerotatus excrucians	190765	Ochlerotatus	7157	Culicidae	2759	Eukaryota	D	GGATCAGGGACAGGATGAAC	0	GATCACACAAATAAGGGTAATCGGTC	3	154	agtcgaaaatggatcagggacaggatgaacTGTATATCCACCACTTTCATCAGGAACTGCTCATGCTGGAGCCTCAGTAGATTTAACAATTTTCTCTCTTCATTTAGCTGGTGTATCCTCAATTTTAGGAGCAGTAAATTTCATTACTACTGTTATTAATATACGATCTGCAGGAATTACTTTAgaccgattacccttatttgtgtgatctgttgtaatt	Ochlerotatus excrucians voucher BIOUG<CAN>:10PROBE-12456 cytochrome oxidase subunit 1 (COI) gene, partial cds; mitochondrial
JF876573	658	species	120872	Aedes cinereus	7158	Aedes	7157	Culicidae	2759	Eukaryota	D	GGAGCTGGTACAGGGTGAAC	0	GATCAAACAAATAAAGGAAGTCGATC	2	154	agtagaaaatggagctggtacagggtgaacTGTTTACCCTCCTTTATCTTCTGGAACTGCTCATGCAGGAGGTTCTGTTGACTTAGCAATTTTCTCTTTACATTTAGCCGGGATTTCTTCAATTTTAGGGGCCGTAAATTTTATTACAACTGTTATTAATATACGATCAGCAGGAATTACACTTgatcgacttcctttatttgtttgatcagttgttatt	Aedes cinereus voucher BIOUG<CAN>:10PROBE-12415 cytochrome oxidase subunit 1 (COI) gene, partial cds; mitochondrial
JF876572	658	species	120872	Aedes cinereus	7158	Aedes	7157	Culicidae	2759	Eukaryota	D	GGAGCTGGTACAGGATGAAC	0	GATCAAACAAATAAAGGAAGTCGATC	2	154	agtagaaaatggagctggtacaggatgaacTGTTTATCCTCCTTTATCTTCTGGGACTGCTCATGCAGGAGGTTCTGTTGACTTAGCAATTTTCTCTTTACATTTAGCTGGGATTTCTTCAATTTTAGGGGCCGTAAATTTTATTACAACTGTTATTAATATACGATCAGCAGGAATTACACTTgatcgacttcctttatttgtttgatcagttgttatt	Aedes cinereus voucher BIOUG<CAN>:10PROBE-12414 cytochrome oxidase subunit 1 (COI) gene, partial cds; mitochondrial
JF876480	658	species	1129559	Ochlerotatus diantaeus	190765	Ochlerotatus	7157	Culicidae	2759	Eukaryota	D	GGATCAGGAACAGGATGAAC	0	GATCAAACAAATAAAGGTAATCGATC	0	154	agtagaaaatggatcaggaacaggatgaacGGTTTACCCTCCTCTTTCATCAGGAACTGCACATGCAGGAGCTTCTGTTGATTTAACAATTTTTTCTCTTCATTTAGCGGGTGTGTCTTCGATTTTAGGAGCAGTAAATTTTATTACTACTGTTATTAATATACGATCTGCAGGAATTACTTTAgatcgattacctttatttgtttgatcagttgtaatt	Ochlerotatus diantaeus voucher BIOUG<CAN>:10PROBE-13291 cytochrome oxidase subunit 1 (COI) gene, partial cds; mitochondrial
JF876447	658	species	329103	Ochlerotatus excrucians	190765	Ochlerotatus	7157	Culicidae	2759	Eukaryota	D	GGGTCAGGGACAGGATGAAC	0	GATCACACAAATAAGGGTAATCGGTC	3	154	agtcgaaaatgggtcagggacaggatgaacTGTATATCCACCACTTTCATCAGGAACTGCTCATGCTGGAGCCTCAGTAGATTTAACAATTTTCTCTCTTCATTTAGCTGGTGTATCCTCAATTTTAGGGGCAGTAAATTTCATTACTACTGTTATTAATATACGATCTGCAGGAATTACTTTAgaccgattacccttatttgtgtgatctgttgtaatt	Ochlerotatus excrucians voucher BIOUG<CAN>:10PROBE-13246 cytochrome oxidase subunit 1 (COI) gene, partial cds; mitochondrial
JF876416	658	species	329100	Ochlerotatus abserratus	190765	Ochlerotatus	7157	Culicidae	2759	Eukaryota	D	GGGTCAGGGACAGGTTGAAC	0	GATCATACAAATAAAGGTAATCGATC	0	154	ggttgaaaatgggtcagggacaggttgaacGGTGTACCCACCTCTTTCTTCTGGAACTGCCCATGCAGGAGCTTCAGTTGATTTAACAATTTTTTCTCTTCATTTAGCGGGGATCTCTTCAATTTTAGGAGCAGTAAATTTTATTACTACTGTTATTAATATGCGATCTTCAGGGATTACATTAgatcgattacctttatttgtatgatccgttgtaatt	Ochlerotatus abserratus voucher BIOUG<CAN>:10PROBE-13209 cytochrome oxidase subunit 1 (COI) gene, partial cds; mitochondrial
JF876395	658	species	329103	Ochlerotatus excrucians	190765	Ochlerotatus	7157	Culicidae	2759	Eukaryota	D	GGATCAGGGACAGGATGAAC	0	GATCACACAAATAAGGGTAACCGGTC	4	154	agtcgaaaatggatcagggacaggatgaacTGTATATCCACCACTTTCATCAGGAACTGCTCATGCTGGAGCCTCAGTAGATTTAACAATTTTCTCTCTTCATTTAGCTGGTGTATCCTCAATTTTAGGGGCAGTAAATTTCATTACTACTGTTATTAATATACGATCTGCAGGAATTACTTTAgaccggttacccttatttgtgtgatctgttgtaatt	Ochlerotatus excrucians voucher BIOUG<CAN>:10PROBE-12289 cytochrome oxidase subunit 1 (COI) gene, partial cds; mitochondrial
JF876394	658	species	329103	Ochlerotatus excrucians	190765	Ochlerotatus	7157	Culicidae	2759	Eukaryota	D	GGATCAGGGACAGGATGAAC	0	GATCACACAAATAAGGGTAATCGGTC	3	154	agtcgaaaatggatcagggacaggatgaacTGTATATCCACCACTTTCATCAGGAACTGCTCATGCTGGAGCCTCAGTAGATTTAACAATTTTCTCTCTTCATTTAGCTGGTGTATCCTCAATTTTAGGGGCAGTAAATTTCATTACTACTGTTATTAATATACGATCTGCAGGAATTACTTTAgaccgattacccttatttgtgtgatctgttgtaatt	Ochlerotatus excrucians voucher BIOUG<CAN>:10PROBE-12288 cytochrome oxidase subunit 1 (COI) gene, partial cds; mitochondrial
JF876393	658	species	329103	Ochlerotatus excrucians	190765	Ochlerotatus	7157	Culicidae	2759	Eukaryota	D	GGATCAGGGACAGGATGAAC	0	GATCACACAAATAAGGGTAATCGGTC	3	154	agtcgaaaatggatcagggacaggatgaacTGTATATCCACCACTTTCATCAGGAACTGCTCATGCTGGAGCCTCAGTAGATTTAACAATTTTCTCTCTTCATTTAGCTGGTGTATCCTCAATTTTAGGGGCAGTAAATTTCATTACTACTGTTATTAATATACGATCTGCAGGAATTACTTTAgaccgattacccttatttgtgtgatctgttgtaatt	Ochlerotatus excrucians voucher BIOUG<CAN>:10PROBE-12287 cytochrome oxidase subunit 1 (COI) gene, partial cds; mitochondrial
JF876369	658	species	329103	Ochlerotatus excrucians	190765	Ochlerotatus	7157	Culicidae	2759	Eukaryota	D	GGATCAGGGACAGGATGAAC	0	GATCACACAAATAAGGGTAATCGGTC	3	154	agtcgaaaatggatcagggacaggatgaacTGTATATCCACCACTTTCATCAGGAACTGCTCATGCTGGAGCCTCAGTAGATTTAACAATTTTCTCTCTTCATTTAGCTGGTGTATCCTCAATTTTAGGGGCAGTAAATTTCATTACTACTGTTATTAATATACGATCTGCAGGAATTACTTTAgaccgattacccttatttgtgtgatctgttgtaatt	Ochlerotatus excrucians voucher BIOUG<CAN>:10PROBE-12258 cytochrome oxidase subunit 1 (COI) gene, partial cds; mitochondrial
JF876368	658	species	329103	Ochlerotatus excrucians	190765	Ochlerotatus	7157	Culicidae	2759	Eukaryota	D	GGATCAGGGACAGGATGAAC	0	GATCACACAAATAAGGGTAATCGGTC	3	154	agtcgaaaatggatcagggacaggatgaacTGTATATCCACCACTTTCATCAGGAACTGCTCATGCTGGAGCCTCAGTAGATTTAACAATTTTCTCTCTTCATTTAGCTGGTGTATCCTCAATTTTAGGAGCAGTAAATTTCATTACTACTGTTATTAATATACGATCTGCAGGAATTACTTTAgaccgattacccttatttgtgtgatctgttgtaatt	Ochlerotatus excrucians voucher BIOUG<CAN>:10PROBE-12257 cytochrome oxidase subunit 1 (COI) gene, partial cds; mitochondrial
JF876323	658	species	329103	Ochlerotatus excrucians	190765	Ochlerotatus	7157	Culicidae	2759	Eukaryota	D	GGATCAGGGACAGGATGAAC	0	GATCACACAAATAAGGGTAATCGGTC	3	154	agtcgaaaatggatcagggacaggatgaacTGTATATCCACCACTTTCATCAGGAACTGCTCATGCTGGAGCCTCAGTAGATTTAACAATTTTCTCTCTTCATTTAGCTGGTGTATCCTCAATTTTAGGGGCAGTAAATTTCATTACTACTGTTATTAATATACGATCTGCAGGAATTACTTTAgaccgattacccttatttgtgtgatctgttgtaatt	Ochlerotatus excrucians voucher BIOUG<CAN>:10PROBE-12199 cytochrome oxidase subunit 1 (COI) gene, partial cds; mitochondrial
JF876283	658	species	329100	Ochlerotatus abserratus	190765	Ochlerotatus	7157	Culicidae	2759	Eukaryota	D	GGGTCAGGGACAGGTTGAAC	0	GATCATACAAATAAAGGTAATCGATC	0	154	ggttgaaaatgggtcagggacaggttgaacGGTGTACCCACCTCTTTCTTCTGGAACTGCCCATGCAGGAGCTTCAGTTGATTTAACAATTTTTTCTCTTCATTTAGCGGGGATCTCTTCAATTTTAGGAGCAGTAAATTTTATTACTACTGTTATTAATATGCGATCTTCAGGGATTACATTAgatcgattacctttatttgtatgatccgttgtaatt	Ochlerotatus abserratus voucher BIOUG<CAN>:10PROBE-12147 cytochrome oxidase subunit 1 (COI) gene, partial cds; mitochondrial
JF876282	658	species	329100	Ochlerotatus abserratus	190765	Ochlerotatus	7157	Culicidae	2759	Eukaryota	D	GGGTCAGGGACAGGTTGAAC	0	GATCATACAAATAAAGGTAATCGATC	0	154	ggttgaaaatgggtcagggacaggttgaacGGTGTACCCACCTCTTTCTTCTGGAACTGCCCATGCAGGAGCTTCAGTTGATTTAACAATTTTTTCTCTTCATTTAGCGGGGATCTCTTCAATTTTAGGAGCAGTAAATTTTATTACTACTGTTATTAATATGCGATCTTCAGGGATTACATTAgatcgattacctttatttgtatgatccgttgtaatt	Ochlerotatus abserratus voucher BIOUG<CAN>:10PROBE-12146 cytochrome oxidase subunit 1 (COI) gene, partial cds; mitochondrial
JF876239	658	species	329100	Ochlerotatus abserratus	190765	Ochlerotatus	7157	Culicidae	2759	Eukaryota	D	GGGTCAGGGACAGGTTGAAC	0	GATCATACAAATAAAGGTAATCGATC	0	154	ggttgaaaatgggtcagggacaggttgaacGGTGTACCCACCTCTTTCTTCTGGAACTGCCCATGCAGGAGCTTCAGTTGATTTAACAATTTTTTCTCTTCATTTAGCGGGGATCTCTTCAATTTTAGGAGCAGTAAATTTTATTACTACTGTTATTAATATGCGATCTTCAGGGATTACATTAgatcgattacctttatttgtatgatccgttgtaatt	Ochlerotatus abserratus voucher BIOUG<CAN>:10PROBE-12091 cytochrome oxidase subunit 1 (COI) gene, partial cds; mitochondrial
JF876237	658	species	329103	Ochlerotatus excrucians	190765	Ochlerotatus	7157	Culicidae	2759	Eukaryota	D	GGATCAGGGACAGGATGAAC	0	GATCATACAAATAAGGGTAATCGGTC	2	154	agtcgaaaatggatcagggacaggatgaacTGTATATCCACCACTTTCATCAGGAACTGCTCATGCTGGAGCCTCAGTAGATTTAACAATTTTCTCTCTTCATTTAGCTGGTGTATCCTCAATTTTAGGAGCAGTAAATTTCATTACTACTGTTATTAATATACGATCTGCAGGAATTACTTTAgaccgattacccttatttgtatgatctgttgtaatt	Ochlerotatus excrucians voucher BIOUG<CAN>:10PROBE-12089 cytochrome oxidase subunit 1 (COI) gene, partial cds; mitochondrial
JF876180	658	species	329103	Ochlerotatus excrucians	190765	Ochlerotatus	7157	Culicidae	2759	Eukaryota	D	GGATCAGGGACAGGATGAAC	0	GATCACACAAATAAGGGTAATCGGTC	3	154	agtcgaaaatggatcagggacaggatgaacTGTATATCCACCACTTTCATCAGGAACTGCTCATGCTGGAGCCTCAGTAGATTTAACAATTTTCTCTCTTCATTTAGCTGGTGTATCCTCAATTTTAGGGGCAGTAAATTTCATTACTACTGTTATTAATATACGATCTGCAGGAATTACTTTAgaccgattacccttatttgtgtgatctgttgtaatt	Ochlerotatus excrucians voucher BIOUG<CAN>:10PROBE-12020 cytochrome oxidase subunit 1 (COI) gene, partial cds; mitochondrial
JF876084	658	species	329100	Ochlerotatus abserratus	190765	Ochlerotatus	7157	Culicidae	2759	Eukaryota	D	GGGTCAGGGACAGGTTGAAC	0	GATCATACAAATAAAGGTAATCGATC	0	154	ggttgaaaatgggtcagggacaggttgaacGGTGTACCCACCTCTTTCTTCTGGAACTGCCCATGCAGGAGCTTCAGTTGATTTAACAATTTTTTCTCTTCATTTAGCGGGGATCTCTTCAATTTTAGGAGCAGTAAATTTTATTACTACTGTTATTAATATGCGATCTTCAGGGATTACATTAgatcgattacctttatttgtatgatccgttgtaatt	Ochlerotatus abserratus voucher BIOUG<CAN>:10PROBE-11906 cytochrome oxidase subunit 1 (COI) gene, partial cds; mitochondrial
JF876083	658	species	329100	Ochlerotatus abserratus	190765	Ochlerotatus	7157	Culicidae	2759	Eukaryota	D	GGGTCAGGGACAGGTTGAAC	0	GATCATACAAATAAAGGTAATCGATC	0	154	ggttgaaaatgggtcagggacaggttgaacGGTGTACCCACCTCTTTCTTCTGGAACTGCCCATGCAGGAGCTTCAGTTGATTTAACAATTTTTTCTCTTCATTTAGCGGGGATCTCTTCAATTTTAGGAGCAGTAAATTTTATTACTACTGTTATTAATATGCGATCTTCAGGGATTACATTAgatcgattacctttatttgtatgatccgttgtaatt	Ochlerotatus abserratus voucher BIOUG<CAN>:10PROBE-11905 cytochrome oxidase subunit 1 (COI) gene, partial cds; mitochondrial
JF876061	658	species	329103	Ochlerotatus excrucians	190765	Ochlerotatus	7157	Culicidae	2759	Eukaryota	D	GGATCAGGGACAGGATGAAC	0	GATCATACAAATAAGGGTAATCGGTC	2	154	agtcgaaaatggatcagggacaggatgaacTGTATATCCACCACTTTCATCAGGAACTGCTCATGCTGGAGCCTCAGTAGATTTAACAATTTTCTCTCTTCATTTAGCTGGTGTATCCTCAATTTTAGGAGCAGTAAATTTCATTACTACTGTTATTAATATACGATCTGCAGGAATTACTTTAgaccgattacccttatttgtatgatctgttgtaatt	Ochlerotatus excrucians voucher BIOUG<CAN>:10PROBE-11873 cytochrome oxidase subunit 1 (COI) gene, partial cds; mitochondrial
JF876050	658	species	329100	Ochlerotatus abserratus	190765	Ochlerotatus	7157	Culicidae	2759	Eukaryota	D	GGGTCAGGGACAGGTTGAAC	0	GATCATACAAATAAAGGTAATCGATC	0	154	ggttgaaaatgggtcagggacaggttgaacGGTGTACCCACCTCTTTCTTCTGGAACTGCCCATGCAGGAGCTTCAGTTGATTTAACAATTTTTTCTCTTCATTTAGCGGGGATCTCTTCAATTTTAGGAGCAGTAAATTTTATTACTACTGTTATTAATATGCGATCTTCAGGGATTACATTAgatcgattacctttatttgtatgatccgttgtaatt	Ochlerotatus abserratus voucher BIOUG<CAN>:10PROBE-11858 cytochrome oxidase subunit 1 (COI) gene, partial cds; mitochondrial
JF875982	658	species	329103	Ochlerotatus excrucians	190765	Ochlerotatus	7157	Culicidae	2759	Eukaryota	D	GGATCAGGGACAGGATGAAC	0	GATCACACAAATAAGGGTAATCGGTC	3	154	agtcgaaaatggatcagggacaggatgaacTGTGTACCCACCACTTTCATCAGGAACTGCTCATGCTGGAGCCTCAGTAGATTTAACAATTTTCTCTCTTCATTTAGCTGGTGTATCCTCAATTTTAGGGGCAGTAAATTTCATTACTACTGTTATTAATATACGATCTGCAGGAATTACTTTAgaccgattacccttatttgtgtgatctgttgtaatt	Ochlerotatus excrucians voucher BIOUG<CAN>:10PROBE-11748 cytochrome oxidase subunit 1 (COI) gene, partial cds; mitochondrial
JF875981	658	species	329103	Ochlerotatus excrucians	190765	Ochlerotatus	7157	Culicidae	2759	Eukaryota	D	GGATCAGGGACAGGATGAAC	0	GATCACACAAATAAGGGTAATCGGTC	3	154	agtcgaaaatggatcagggacaggatgaacTGTATATCCACCACTTTCATCAGGAACTGCTCATGCTGGAGCCTCAGTAGATTTAACAATTTTCTCTCTTCATTTAGCTGGTGTATCCTCAATTTTAGGGGCAGTAAATTTCATTACTACTGTTATTAATATACGATCTGCAGGAATTACTTTAgaccgattacccttatttgtgtgatctgttgtaatt	Ochlerotatus excrucians voucher BIOUG<CAN>:10PROBE-11747 cytochrome oxidase subunit 1 (COI) gene, partial cds; mitochondrial
JF875948	658	species	329100	Ochlerotatus abserratus	190765	Ochlerotatus	7157	Culicidae	2759	Eukaryota	D	GGGTCAGGGACAGGTTGAAC	0	GATCATACAAATAAAGGTAATCGATC	0	154	ggttgaaaatgggtcagggacaggttgaacGGTGTACCCACCTCTTTCTTCTGGAACTGCCCATGCAGGAGCTTCAGTTGATTTAACAATTTTTTCTCTTCATTTAGCGGGGATCTCTTCAATTTTAGGAGCAGTAAATTTTATTACTACTGTTATTAATATGCGATCTTCAGGGATTACATTAgatcgattacctttatttgtatgatccgttgtaatt	Ochlerotatus abserratus voucher BIOUG<CAN>:10PROBE-11704 cytochrome oxidase subunit 1 (COI) gene, partial cds; mitochondrial
JF875947	658	species	329100	Ochlerotatus abserratus	190765	Ochlerotatus	7157	Culicidae	2759	Eukaryota	D	GGGTCAGGGACAGGTTGAAC	0	GATCATACAAATAAAGGTAATCGATC	0	154	ggttgaaaatgggtcagggacaggttgaacGGTGTACCCACCTCTTTCTTCTGGAACTGCCCATGCAGGAGCTTCAGTTGATTTAACAATTTTTTCTCTTCATTTAGCGGGGATCTCTTCAATTTTAGGAGCAGTAAATTTTATTACTACTGTTATTAATATGCGATCTTCAGGGATTACATTAgatcgattacctttatttgtatgatccgttgtaatt	Ochlerotatus abserratus voucher BIOUG<CAN>:10PROBE-11703 cytochrome oxidase subunit 1 (COI) gene, partial cds; mitochondrial
JF875914	658	species	329100	Ochlerotatus abserratus	190765	Ochlerotatus	7157	Culicidae	2759	Eukaryota	D	GGGTCAGGGACAGGTTGAAC	0	GATCATACAAATAAAGGTAATCGATC	0	154	ggttgaaaatgggtcagggacaggttgaacGGTGTACCCACCTCTTTCTTCTGGAACTGCCCATGCAGGAGCTTCAGTTGATTTAACAATTTTTTCTCTTCATTTAGCGGGGATCTCTTCAATTTTAGGAGCAGTAAATTTTATTACTACTGTTATTAATATGCGATCTTCAGGGATTACATTAgatcgattacctttatttgtatgatccgttgtaatt	Ochlerotatus abserratus voucher BIOUG<CAN>:10PROBE-11660 cytochrome oxidase subunit 1 (COI) gene, partial cds; mitochondrial
JF875882	658	species	329103	Ochlerotatus excrucians	190765	Ochlerotatus	7157	Culicidae	2759	Eukaryota	D	GGATCAGGGACAGGATGAAC	0	GATCACACAAATAAGGGTAATCGGTC	3	154	agtcgaaaatggatcagggacaggatgaacTGTATATCCACCACTTTCATCAGGAACTGCTCATGCTGGAGCCTCAGTAGATTTAACAATTTTCTCTCTTCATTTAGCTGGTGTATCCTCAATTTTAGGGGCAGTAAATTTCATTACTACTGTTATTAATATACGATCTGCAGGAATTACTTTAgaccgattacccttatttgtgtgatctgttgtaatt	Ochlerotatus excrucians voucher BIOUG<CAN>:10PROBE-11611 cytochrome oxidase subunit 1 (COI) gene, partial cds; mitochondrial
JF875881	658	species	329103	Ochlerotatus excrucians	190765	Ochlerotatus	7157	Culicidae	2759	Eukaryota	D	GGGTCAGGGACAGGATGAAC	0	GATCACACAAATAAGGGTAATCGGTC	3	154	agtcgaaaatgggtcagggacaggatgaacTGTATATCCACCACTTTCATCAGGAACTGCTCATGCTGGAGCCTCAGTAGATTTAACAATTTTCTCTCTTCATTTAGCTGGTGTATCCTCAATTTTAGGGGCAGTAAATTTCATTACTACTGTTATTAATATACGATCTGCAGGAATTACTTTAgaccgattacccttatttgtgtgatctgttgtaatt	Ochlerotatus excrucians voucher BIOUG<CAN>:10PROBE-11610 cytochrome oxidase subunit 1 (COI) gene, partial cds; mitochondrial
JF875879	658	species	329103	Ochlerotatus excrucians	190765	Ochlerotatus	7157	Culicidae	2759	Eukaryota	D	GGATCAGGGACAGGATGAAC	0	GATCACACAAATAAGGGTAATCGGTC	3	154	agtcgaaaatggatcagggacaggatgaacTGTATATCCACCACTTTCATCAGGAACTGCTCATGCTGGAGCCTCAGTAGATTTAACAATTTTCTCTCTTCATTTAGCTGGTGTATCCTCAATTTTAGGGGCAGTAAATTTCATTACTACTGTTATTAATATACGATCTGCAGGAATTACTTTAgaccgattacccttatttgtgtgatctgttgtaatt	Ochlerotatus excrucians voucher BIOUG<CAN>:10PROBE-11608 cytochrome oxidase subunit 1 (COI) gene, partial cds; mitochondrial
JF875739	658	species	329103	Ochlerotatus excrucians	190765	Ochlerotatus	7157	Culicidae	2759	Eukaryota	D	GGCTCAGGGACAGGATGAAC	1	GATCACACAAATAAGGGTAATCGGTC	3	154	agtcgaaaatggctcagggacaggatgaacTGTATATCCACCACTTTCATCAGGAACTGCTCATGCTGGAGCCTCAGTAGATTTAACAATTTTCTCTCTTCATTTAGCTGGTGTATCCTCAATTTTAGGGGCAGTAAATTTCATTACTACTGTTATTAATATACGATCTGCAGGAATTACTTTAgaccgattacccttatttgtgtgatctgttgtaatt	Ochlerotatus excrucians voucher BIOUG<CAN>:10PROBE-11246 cytochrome oxidase subunit 1 (COI) gene, partial cds; mitochondrial
JF875738	658	species	329103	Ochlerotatus excrucians	190765	Ochlerotatus	7157	Culicidae	2759	Eukaryota	D	GGATCAGGGACAGGATGAAC	0	GATCACACAAATAAGGGTAATCGGTC	3	154	agtcgaaaatggatcagggacaggatgaacTGTATATCCACCACTTTCATCAGGAACTGCTCATGCTGGAGCCTCAGTAGATTTAACAATTTTCTCTCTTCATTTAGCTGGTGTATCCTCAATTTTAGGGGCAGTAAATTTCATTACTACTATTATTAATATACGATCTGCAGGAATTACTTTAgaccgattacccttatttgtgtgatctgttgtaatt	Ochlerotatus excrucians voucher BIOUG<CAN>:10PROBE-11245 cytochrome oxidase subunit 1 (COI) gene, partial cds; mitochondrial
JF875737	658	species	329103	Ochlerotatus excrucians	190765	Ochlerotatus	7157	Culicidae	2759	Eukaryota	D	GGATCAGGGACAGGATGAAC	0	GATCACACAAATAAGGGTAATCGGTC	3	154	agtcgaaaatggatcagggacaggatgaacTGTATATCCACCACTTTCATCAGGAACTGCTCATGCTGGAGCCTCAGTAGATTTAACAATTTTCTCTCTTCATTTAGCTGGTGTATCCTCAATTTTAGGGGCAGTAAATTTCATTACTACTGTTATTAATATACGATCTGCAGGAATTACTTTAgaccgattacccttatttgtgtgatctgttgtaatt	Ochlerotatus excrucians voucher BIOUG<CAN>:10PROBE-11244 cytochrome oxidase subunit 1 (COI) gene, partial cds; mitochondrial
JF875648	658	species	329103	Ochlerotatus excrucians	190765	Ochlerotatus	7157	Culicidae	2759	Eukaryota	D	GGATCAGGGACAGGATGAAC	0	GATCACACAAATAAGGGTAATCGGTC	3	154	agtcgaaaatggatcagggacaggatgaacTGTATATCCACCACTTTCATCAGGAACTGCTCATGCTGGAGCCTCAGTAGATTTAACAATTTTCTCTCTTCATTTAGCTGGTGTATCCTCAATTTTAGGGGCAGTAAATTTTATTACTACTGTTATTAATATACGATCTGCAGGAATTACTTTAgaccgattacccttatttgtgtgatctgttgtaatt	Ochlerotatus excrucians voucher BIOUG<CAN>:10PROBE-11141 cytochrome oxidase subunit 1 (COI) gene, partial cds; mitochondrial
JF875615	658	species	329103	Ochlerotatus excrucians	190765	Ochlerotatus	7157	Culicidae	2759	Eukaryota	D	GGATCAGGGACAGGATGAAC	0	GATCACACAAATAAGGGTAATCGGTC	3	154	agtcgaaaatggatcagggacaggatgaacTGTATATCCACCACTTTCATCAGGAACTGCTCATGCTGGAGCCTCAGTAGATTTAACAATTTTCTCTCTTCATTTAGCTGGTGTATCCTCAATTTTAGGAGCAGTAAATTTCATTACTACTGTTATTAATATACGATCTGCAGGAATTACTTTAgaccgattacccttatttgtgtgatctgttgtaatt	Ochlerotatus excrucians voucher BIOUG<CAN>:10PROBE-11105 cytochrome oxidase subunit 1 (COI) gene, partial cds; mitochondrial
JF875614	658	species	329099	Ochlerotatus communis	190765	Ochlerotatus	7157	Culicidae	2759	Eukaryota	D	GGATCAGGAACAGGATGAAC	0	GATCAAACAAATAAAGGTAATCGATC	0	154	ggttgaaaatggatcaggaacaggatgaacTGTGTACCCACCTCTTTCTTCTGGAACTGCTCACGCAGGAGCTTCAGTTGATTTAACAATTTTTTCTCTTCATTTAGCAGGAATTTCATCAATTTTAGGAGCAGTAAATTTTATTACTACTGTTATTAATATACGATCTTCAGGAATTACATTAgatcgattacctttatttgtttgatctgttgtaatt	Ochlerotatus communis voucher BIOUG<CAN>:10PROBE-11104 cytochrome oxidase subunit 1 (COI) gene, partial cds; mitochondrial
JF875613	658	species	329103	Ochlerotatus excrucians	190765	Ochlerotatus	7157	Culicidae	2759	Eukaryota	D	GGATCAGGGACAGGATGAAC	0	GATCACACAAATAANGGTAATCGGTC	3	154	agtcgaaaatggatcagggacaggatgaacTGTATATCCACCACTTTCATCAGGAACTGCTCATGCTGGAGCCTCAGTAGATTTAACAATTTTCTCTCTTCATTTAGCTGGTGTATCCTCAATTTTAGGGGCAGTAAATTTCATTACTACTGTTATTAATATACGATCTGCAGGAATTACTTTAgaccgattaccnttatttgtgtgatctgttgtaatt	Ochlerotatus excrucians voucher BIOUG<CAN>:10PROBE-11103 cytochrome oxidase subunit 1 (COI) gene, partial cds; mitochondrial
JF875532	658	species	329103	Ochlerotatus excrucians	190765	Ochlerotatus	7157	Culicidae	2759	Eukaryota	D	GGATCAGGGACAGGATGAAC	0	GATCACACAAATAAGGGTAATCGGTC	3	154	agtcgaaaatggatcagggacaggatgaacTGTATATCCACCACTTTCATCAGGAACTGCTCATGCTGGAGCCTCAGTAGATTTAACAATTTTCTCTCTTCATTTAGCTGGTGTATCCTCAATTTTAGGGGCAGTAAATTTCATTACTACTGTTATTAATATACGATCTGCAGGAATTACTTTAgaccgattacccttatttgtgtgatctgttgtaatt	Ochlerotatus excrucians voucher BIOUG<CAN>:10PROBE-11013 cytochrome oxidase subunit 1 (COI) gene, partial cds; mitochondrial
JF875429	658	species	329100	Ochlerotatus abserratus	190765	Ochlerotatus	7157	Culicidae	2759	Eukaryota	D	GGGTCAGGGACAGGTTGAAC	0	GATCATACAAATAAAGGTAATCGATC	0	154	ggttgaaaatgggtcagggacaggttgaacGGTGTACCCACCTCTTTCTTCTGGAACTGCCCATGCAGGAGCTTCAGTTGATTTAACAATTTTTTCTCTTCATTTAGCGGGGATCTCTTCAATTTTAGGAGCAGTAAATTTTATTACTACTGTTATTAATATGCGATCTTCAGGGATTACATTAgatcgattacctttatttgtatgatccgttgtaatt	Ochlerotatus abserratus voucher BIOUG<CAN>:10PROBE-10900 cytochrome oxidase subunit 1 (COI) gene, partial cds; mitochondrial
JF875308	658	species	329100	Ochlerotatus abserratus	190765	Ochlerotatus	7157	Culicidae	2759	Eukaryota	D	GGGTCAGGGACAGGTTGAAC	0	GATCATACAAATAAAGGTAATCGATC	0	154	ggttgaaaatgggtcagggacaggttgaacGGTGTACCCACCTCTTTCTTCTGGAACTGCCCATGCAGGAGCTTCAGTTGATTTAACAATTTTTTCTCTTCATTTAGCGGGGATCTCTTCAATTTTAGGAGCAGTAAATTTTATTACTACTGTTATTAATATGCGATCTTCAGGGATTACATTAgatcgattacctttatttgtatgatccgttgtaatt	Ochlerotatus abserratus voucher BIOUG<CAN>:10PROBE-10768 cytochrome oxidase subunit 1 (COI) gene, partial cds; mitochondrial
JF875306	658	species	329100	Ochlerotatus abserratus	190765	Ochlerotatus	7157	Culicidae	2759	Eukaryota	D	GGGTCAGGGACAGGTTGAAC	0	GATCATACAAATAAAGGTAATCGATC	0	154	ggttgaaaatgggtcagggacaggttgaacGGTGTACCCACCTCTTTCTTCTGGAACTGCCCATGCAGGAGCTTCAGTTGATTTAACAATTTTTTCTCTTCATTTAGCGGGGATCTCTTCAATTTTAGGAGCAGTAAATTTTATTACTACTGTTATTAATATGCGATCTTCAGGGATTACATTAgatcgattacctttatttgtatgatccgttgtaatt	Ochlerotatus abserratus voucher BIOUG<CAN>:10PROBE-10766 cytochrome oxidase subunit 1 (COI) gene, partial cds; mitochondrial
JF875194	658	species	329103	Ochlerotatus excrucians	190765	Ochlerotatus	7157	Culicidae	2759	Eukaryota	D	GGATCAGGGACAGGATGAAC	0	GATCACACAAATAAGGGTAATCGGTC	3	154	agtcgaaaatggatcagggacaggatgaacTGTATATCCACCACTTTCATCAGGAACTGCTCATGCTGGAGCCTCAGTAGATTTAACAATTTTCTCTCTTCATTTAGCTGGTGTATCCTCAATTTTAGGGGCAGTAAATTTTATTACTACTGTTATTAATATACGATCTGCAGGAATTACTTTAgaccgattacccttatttgtgtgatctgttgtaatt	Ochlerotatus excrucians voucher BIOUG<CAN>:10PROBE-10636 cytochrome oxidase subunit 1 (COI) gene, partial cds; mitochondrial
JF875187	658	species	329103	Ochlerotatus excrucians	190765	Ochlerotatus	7157	Culicidae	2759	Eukaryota	D	GGATCAGGGACAGGATGAAC	0	GATCACACAAATAAGGGTAATCGGTC	3	154	agtcgaaaatggatcagggacaggatgaacTGTATATCCACCACTTTCATCAGGAACTGCTCATGCTGGAGCCTCAGTAGATTTAACAATTTTCTCCCTTCATTTAGCTGGTGTATCCTCAATTTTAGGGGCAGTAAATTTCATTACTACTGTTATTAATATACGATCTGCAGGAATTACTTTAgaccgattacccttatttgtgtgatctgttgtaatt	Ochlerotatus excrucians voucher BIOUG<CAN>:10PROBE-10626 cytochrome oxidase subunit 1 (COI) gene, partial cds; mitochondrial
JF875145	658	species	329103	Ochlerotatus excrucians	190765	Ochlerotatus	7157	Culicidae	2759	Eukaryota	D	GGATCAGGGACAGGATGAAC	0	GATCACACAAATAAGGGTAATCGGTC	3	154	agtcgaaaatggatcagggacaggatgaacTGTATATCCACCACTTTCATCAGGAACTGCTCATGCTGGAGCCTCAGTAGATTTAACAATTTTCTCTCTTCATTTAGCTGGTGTATCCTCAATTTTAGGGGCAGTAAATTTCATTACTACTGTTATTAATATACGATCTGCAGGAATTACTTTAgaccgattacccttatttgtgtgatctgttgtaatt	Ochlerotatus excrucians voucher BIOUG<CAN>:10PROBE-10573 cytochrome oxidase subunit 1 (COI) gene, partial cds; mitochondrial
JF875089	658	species	329103	Ochlerotatus excrucians	190765	Ochlerotatus	7157	Culicidae	2759	Eukaryota	D	GGATCAGGGACAGGATGAAC	0	GATCACACAAATAAGGGTAATCGGTC	3	154	agtcgaaaatggatcagggacaggatgaacTGTATATCCACCACTTTCATCAGGAACTGCTCATGCTGGAGCCTCAGTAGATTTAACAATTTTCTCTCTTCATTTAGCTGGTGTATCCTCAATTTTAGGGGCAGTAAATTTTATTACTACTGTTATTAATATACGATCTGCAGGAATTACTTTAgaccgattacccttatttgtgtgatctgttgtaatt	Ochlerotatus excrucians voucher BIOUG<CAN>:10PROBE-10514 cytochrome oxidase subunit 1 (COI) gene, partial cds; mitochondrial
JF875038	658	species	329100	Ochlerotatus abserratus	190765	Ochlerotatus	7157	Culicidae	2759	Eukaryota	D	GGGTCAGGGACAGGTTGAAC	0	GATCATACAAATAAAGGTAATCGATC	0	154	ggttgaaaatgggtcagggacaggttgaacGGTGTACCCACCTCTTTCTTCTGGAACTGCCCATGCAGGAGCTTCAGTTGATTTAACAATTTTTTCTCTTCATTTAGCGGGGATCTCTTCAATTTTAGGAGCAGTAAATTTTATTACTACTGTTATTAATATGCGATCTTCAGGGATTACATTAgatcgattacctttatttgtatgatccgttgtaatt	Ochlerotatus abserratus voucher BIOUG<CAN>:10PROBE-10426 cytochrome oxidase subunit 1 (COI) gene, partial cds; mitochondrial
JF875010	658	species	329100	Ochlerotatus abserratus	190765	Ochlerotatus	7157	Culicidae	2759	Eukaryota	D	GGGTCAGGGACAGGTTGAAC	0	GATCATACAAATAAAGGTAATCGATC	0	154	ggttgaaaatgggtcagggacaggttgaacGGTGTACCCACCTCTTTCTTCTGGAACTGCCCATGCAGGAGCTTCAGTTGATTTAACAATTTTTTCTCTTCATTTAGCGGGGATCTCTTCAATTTTAGGAGCAGTAAATTTTATTACTACTGTTATTAATATGCGATCTTCAGGGATTACATTAgatcgattacctttatttgtatgatccgttgtaatt	Ochlerotatus abserratus voucher BIOUG<CAN>:10PROBE-10393 cytochrome oxidase subunit 1 (COI) gene, partial cds; mitochondrial
JF875009	658	species	329100	Ochlerotatus abserratus	190765	Ochlerotatus	7157	Culicidae	2759	Eukaryota	D	GGGTCAGGGACAGGTTGAAC	0	GATCATACAAATAAAGGTAATCGATC	0	154	ggttgaaaatgggtcagggacaggttgaacGGTGTACCCACCTCTTTCTTCTGGAACTGCCCATGCAGGAGCTTCAGTTGATTTAACAATTTTTTCTCTTCATTTAGCGGGGATCTCTTCAATTTTAGGAGCAGTAAATTTTATTACTACTGTTATTAATATGCGATCTTCAGGGATTACATTAgatcgattacctttatttgtatgatccgttgtaatt	Ochlerotatus abserratus voucher BIOUG<CAN>:10PROBE-10392 cytochrome oxidase subunit 1 (COI) gene, partial cds; mitochondrial
JF874986	658	species	329103	Ochlerotatus excrucians	190765	Ochlerotatus	7157	Culicidae	2759	Eukaryota	D	GGGTCAGGGACAGGATGAAC	0	GATCACACAAATAAGGGTAATCGGTC	3	154	agtcgaaaatgggtcagggacaggatgaacTGTATATCCACCACTTTCATCAGGAACTGCTCATGCTGGAGCCTCAGTAGATTTAACAATTTTCTCTCTTCATTTAGCTGGTGTATCCTCAATTTTAGGGGCAGTAAATTTCATTACTACTGTTATTAATATACGATCTGCAGGAATTACTTTAgaccgattacccttatttgtgtgatctgttgtaatt	Ochlerotatus excrucians voucher BIOUG<CAN>:10PROBE-10361 cytochrome oxidase subunit 1 (COI) gene, partial cds; mitochondrial
JF874868	658	species	329099	Ochlerotatus communis	190765	Ochlerotatus	7157	Culicidae	2759	Eukaryota	D	GGATCAGGAACAGGATGAAC	0	GATCAAACAAATAAAGGTAATCGATC	0	154	ggttgaaaatggatcaggaacaggatgaacTGTGTACCCACCTCTTTCTTCTGGAACTGCTCACGCAGGAGCTTCAGTTGATTTAACAATTTTTTCTCTTCATTTAGCAGGAATTTCATCAATTTTAGGAGCAGTAAATTTTATTACTACTGTTATTAATATACGATCTTCAGGAATTACATTAgatcgattacctttatttgtttgatctgttgtaatt	Ochlerotatus communis voucher BIOUG<CAN>:10PROBE-10229 cytochrome oxidase subunit 1 (COI) gene, partial cds; mitochondrial
JF874808	658	species	329100	Ochlerotatus abserratus	190765	Ochlerotatus	7157	Culicidae	2759	Eukaryota	D	GGGTCAGGGACAGGTTGAAC	0	GATCATACAAATAAAGGTAATCGATC	0	154	ggttgaaaatgggtcagggacaggttgaacGGTGTACCCACCTCTTTCTTCTGGAACTGCCCATGCAGGAGCTTCAGTTGATTTAACAATTTTTTCTCTTCATTTAGCGGGGATCTCTTCAATTTTAGGAGCAGTAAATTTTATTACTACTGTTATTAATATGCGATCTTCAGGGATTACATTAgatcgattacctttatttgtatgatccgttgtaatt	Ochlerotatus abserratus voucher BIOUG<CAN>:10PROBE-10157 cytochrome oxidase subunit 1 (COI) gene, partial cds; mitochondrial
JF874717	658	species	329103	Ochlerotatus excrucians	190765	Ochlerotatus	7157	Culicidae	2759	Eukaryota	D	GGATCAGGGACAGGATGAAC	0	GATCACACAAATAAGGGTAATCGGTC	3	154	agtcgaaaatggatcagggacaggatgaacTGTATATCCACCACTTTCATCAGGAACTGCTCATGCTGGGGCCTCAGTAGATTTAACAATTTTCTCTCTTCATTTAGCTGGTGTATCCTCAATTTTAGGAGCAGTAAATTTCATTACTACTGTTATTAATATACGATCTGCAGGAATTACTTTAgaccgattacccttatttgtgtgatctgttgtaatt	Ochlerotatus excrucians voucher BIOUG<CAN>:10PROBE-09985 cytochrome oxidase subunit 1 (COI) gene, partial cds; mitochondrial
JF874657	658	species	329100	Ochlerotatus abserratus	190765	Ochlerotatus	7157	Culicidae	2759	Eukaryota	D	GGGTCAGGGACAGGTTGAAC	0	GATCATACAAATAAAGGTAATCGATC	0	154	ggttgaaaatgggtcagggacaggttgaacGGTGTACCCACCTCTTTCTTCTGGAACTGCCCATGCAGGAGCTTCAGTTGATTTAACAATTTTTTCTCTTCATTTAGCGGGGATCTCTTCAATTTTAGGAGCAGTAAATTTTATTACTACTGTTATTAATATGCGATCTTCAGGGATTACATTAgatcgattacctttatttgtatgatccgttgtaatt	Ochlerotatus abserratus voucher BIOUG<CAN>:10PROBE-09914 cytochrome oxidase subunit 1 (COI) gene, partial cds; mitochondrial
JF874656	658	species	329100	Ochlerotatus abserratus	190765	Ochlerotatus	7157	Culicidae	2759	Eukaryota	D	GGGTCAGGGACAGGTTGAAC	0	GATCATACAAATAAAGGTAATCGATC	0	154	ggttgaaaatgggtcagggacaggttgaacGGTGTACCCACCTCTTTCTTCTGGAACTGCCCATGCAGGAGCTTCAGTTGATTTAACAATTTTTTCTCTTCATTTAGCGGGGATCTCTTCAATTTTAGGAGCAGTAAATTTTATTACTACTGTTATTAATATGCGATCTTCAGGGATTACATTAgatcgattacctttatttgtatgatccgttgtaatt	Ochlerotatus abserratus voucher BIOUG<CAN>:10PROBE-09913 cytochrome oxidase subunit 1 (COI) gene, partial cds; mitochondrial
JF874506	658	species	329103	Ochlerotatus excrucians	190765	Ochlerotatus	7157	Culicidae	2759	Eukaryota	D	GGATCAGGGACAGGATGAAC	0	GATCACACAAATAAGGGTAATCGGTC	3	154	agtcgaaaatggatcagggacaggatgaacTGTATATCCACCACTTTCATCAGGAACTGCTCATGCTGGAGCCTCAGTAGATTTAACAATTTTCTCTCTTCATTTAGCTGGTGTATCCTCAATTTTAGGGGCAGTAAATTTCATTACTACTGTTATTAATATACGATCTGCAGGAATTACTTTAgaccgattacccttatttgtgtgatctgttgtaatt	Ochlerotatus excrucians voucher BIOUG<CAN>:10PROBE-09736 cytochrome oxidase subunit 1 (COI) gene, partial cds; mitochondrial
JF873558	658	species	743693	Ochlerotatus provocans	190765	Ochlerotatus	7157	Culicidae	2759	Eukaryota	D	GGATCTGGGACAGGGTGAAC	0	GATCAAACAAATAAAGGTAATCGATC	0	154	agtagaaaatggatctgggacagggtgaacAGTTTATCCTCCTCTATCTTCAGGAACTGCTCATGCTGGAGCTTCTGTTGATTTAACAATTTTTTCTCTTCATTTAGCAGGAGTATCTTCTATTTTAGGAGCAGTAAATTTTATTACTACTGTAATTAATATACGATCTTCAGGAATTACTTTAgatcgattacctttatttgtttgatctgttgtaatt	Ochlerotatus provocans voucher BIOUG<CAN>:10JSROW-0748 cytochrome oxidase subunit 1 (COI) gene, partial cds; mitochondrial
JF873447	658	species	743693	Ochlerotatus provocans	190765	Ochlerotatus	7157	Culicidae	2759	Eukaryota	D	GGATCTGGGACAGGATGAAC	0	GATCAAACAAATAAAGGTAATCGATC	0	154	agtagaaaatggatctgggacaggatgaacAGTTTATCCTCCTCTATCTTCAGGAACTGCTCATGCTGGGGCTTCTGTTGATTTAACAATTTTTTCTCTTCATTTAGCAGGAGTATCTTCTATTTTAGGAGCAGTAAATTTTATTACTACTGTAATTAATATACGATCTTCAGGAATTACTTTAgatcgattacctttatttgtttgatctgttgtaatt	Ochlerotatus provocans voucher BIOUG<CAN>:10JSROW-0539 cytochrome oxidase subunit 1 (COI) gene, partial cds; mitochondrial
JF873432	658	species	743693	Ochlerotatus provocans	190765	Ochlerotatus	7157	Culicidae	2759	Eukaryota	D	GGATCTGGGACAGGATGAAC	0	GATCAAACAAATAAAGGTAATCGATC	0	154	agtagaaaatggatctgggacaggatgaacAGTTTATCCTCCTCTATCTTCAGGAACTGCTCATGCTGGAGCTTCTGTTGATTTAACAATTTTTTCTCTTCATTTAGCAGGAGTATCTTCTATTTTAGGAGCAGTAAATTTTATTACTACTGTAATTAATATACGATCTTCAGGAATTACTTTAgatcgattacctttatttgtttgatctgttgtaatt	Ochlerotatus provocans voucher BIOUG<CAN>:10JSROW-0523 cytochrome oxidase subunit 1 (COI) gene, partial cds; mitochondrial
JF868966	658	species	743691	Ochlerotatus fitchii	190765	Ochlerotatus	7157	Culicidae	2759	Eukaryota	D	GGTTCAGGAACAGGATGAAC	1	GATCATACAAATAAAGGTAATCGATC	0	154	agtagaaaatggttcaggaacaggatgaacAGTTTACCCTCCTCTTTCTTCTGGAACTGCTCATGCTGGAGCTTCAGTTGATTTAACTATTTTTTCTCTTCATTTAGCCGGAGTATCTTCAATTTTAGGAGCTGTAAATTTTATTACTACTGTTATTAATATACGATCTTCAGGAATTACTTTAgatcgattacctttatttgtatgatctgttgtaatt	Ochlerotatus fitchii voucher BIOUG<CAN>:10BBCDIP-2319 cytochrome oxidase subunit 1 (COI) gene, partial cds; mitochondrial
JF868964	658	species	49923	Anopheles walkeri	7164	Anopheles	7157	Culicidae	2759	Eukaryota	D	GGGGCAGGTACAGGATGAAC	0	GATCAAACAAATAAAGGTATTCGGTC	1	154	agtagaaaatggggcaggtacaggatgaacAGTTTATCCTCCTTTATCCTCAGGAATTGCTCACGCAGGGGCTTCTGTAGATTTAGCTATTTTTTCTCTTCACTTAGCTGGGATTTCTTCTATTTTAGGGGCTGTAAATTTTATTACTACAGTTATTAATATACGATCTCCTGGGATTACTTTAgaccgaatacctttatttgtttgatcagtggtaatt	Anopheles walkeri voucher BIOUG<CAN>:10BBCDIP-2317 cytochrome oxidase subunit 1 (COI) gene, partial cds; mitochondrial
JF868963	658	species	743691	Ochlerotatus fitchii	190765	Ochlerotatus	7157	Culicidae	2759	Eukaryota	D	GGTTCAGGAACAGGATGAAC	1	GATCATACAAATAAAGGTAATCGATC	0	154	agtagaaaatggttcaggaacaggatgaacAGTTTACCCTCCTCTTTCTTCTGGAACTGCTCATGCTGGAGCTTCAGTTGATTTAACTATTTTTTCTCTTCATTTAGCCGGAGTATCTTCAATTTTAGGAGCTGTAAATTTTATTACTACTGTTATTAATATACGATCTTCAGGAATTACTTTAgatcgattacctttatttgtatgatctgttgtaatt	Ochlerotatus fitchii voucher BIOUG<CAN>:10BBCDIP-2316 cytochrome oxidase subunit 1 (COI) gene, partial cds; mitochondrial
JF868961	658	species	7163	Aedes vexans	7158	Aedes	7157	Culicidae	2759	Eukaryota	D	GGAGCAGGGACAGGATGAAC	0	GATCAAACAAATAAAGGTAATCGATC	0	154	agtagaaaatggagcagggacaggatgaacAGTTTATCCTCCTCTTTCATCAGGAACAGCTCACGCTGGAGCTTCTGTTGATTTAGCAATTTTCTCTCTTCATTTAGCAGGAATTTCATCTATTTTAGGAGCAGTAAATTTTATTACTACTGTTATTAATATACGATCATCTGGAATTACTTTAgatcgattacctttatttgtttgatctgtagtaatt	Aedes vexans voucher BIOUG<CAN>:10BBCDIP-2314 cytochrome oxidase subunit 1 (COI) gene, partial cds; mitochondrial
JF868960	658	species	7163	Aedes vexans	7158	Aedes	7157	Culicidae	2759	Eukaryota	D	GGAGCAGGGACAGGATGAAC	0	GATCAAACAAATAAAGGTAATCGATC	0	154	agtagaaaatggagcagggacaggatgaacAGTTTATCCTCCTCTTTCATCAGGAACAGCTCACGCTGGAGCTTCTGTTGATTTAGCAATTTTCTCTCTTCATTTAGCAGGAATTTCATCTATTTTAGGAGCAGTAAATTTTATTACTACTGTTATTAATATACGATCATCTGGAATTACTTTAgatcgattacctttatttgtttgatctgtagtaatt	Aedes vexans voucher BIOUG<CAN>:10BBCDIP-2313 cytochrome oxidase subunit 1 (COI) gene, partial cds; mitochondrial
JF868958	658	species	7163	Aedes vexans	7158	Aedes	7157	Culicidae	2759	Eukaryota	D	GGAGCAGGGACAGGATGAAC	0	GATCAAACAAATAAAGGTAATCGGTC	1	154	agtagaaaatggagcagggacaggatgaacAGTTTATCCTCCTCTTTCATCAGGAACAGCTCACGCTGGAGCTTCTGTTGATTTAGCAATTTTCTCTCTTCATTTAGCAGGAATTTCATCTATTTTAGGAGCAGTAAATTTTATTACTACTGTTATTAATATACGATCATCTGGAATTACTTTAgaccgattacctttatttgtttgatctgtagtaatt	Aedes vexans voucher BIOUG<CAN>:10BBCDIP-2311 cytochrome oxidase subunit 1 (COI) gene, partial cds; mitochondrial
JF868956	658	species	1205942	Ochlerotatus sierrensis	190765	Ochlerotatus	7157	Culicidae	2759	Eukaryota	D	GGAGCTGGTACAGGATGAAC	0	GATCAAACAAATAAAGGTAATCGATC	0	154	agtagaaaatggagctggtacaggatgaacTGTTTACCCCCCTCTCTCATCAATTCCTGCCCATGCAGGAGCTTCAGTTGATTTAACAATTTTTTCTCTTCATTTAGCTGGAGTCTCATCAATTTTAGGAGCAGTAAATTTTATTACTACTGTTATTAATATGCGATCTTCTGGTATTACTTTAgatcgattacctttatttgtttgatccgttgtaatt	Ochlerotatus sierrensis voucher BIOUG<CAN>:10BBCDIP-2309 cytochrome oxidase subunit 1 (COI) gene, partial cds; mitochondrial
JF868955	658	species	7163	Aedes vexans	7158	Aedes	7157	Culicidae	2759	Eukaryota	D	GGAGCAGGGACAGGATGAAC	0	GATCAAACAAATAAAGGTAATCGGTC	1	154	agtagaaaatggagcagggacaggatgaacAGTTTATCCTCCTCTTTCATCAGGAACAGCTCACGCTGGAGCTTCAGTTGATTTAGCAATTTTCTCTCTTCATTTAGCAGGAATTTCATCTATTTTAGGGGCAGTAAATTTTATTACTACTGTTATTAATATACGATCATCTGGAATTACTTTAgaccgattacctttatttgtttgatctgtaataatt	Aedes vexans voucher BIOUG<CAN>:10BBCDIP-2308 cytochrome oxidase subunit 1 (COI) gene, partial cds; mitochondrial
JF868954	658	species	663928	Ochlerotatus dorsalis	190765	Ochlerotatus	7157	Culicidae	2759	Eukaryota	D	GGATCAGGGACAGGGTGAAC	0	GATCAAACAAATAAAGGTAATCGATC	0	154	agtagaaaatggatcagggacagggtgaacAGTTTATCCACCTCTTTCATCTGGAACTGCTCATGCAGGAGCCTCAGTTGATTTAACAATTTTTTCTTTACATTTAGCTGGAGTATCATCAATTTTAGGAGCAGTAAATTTTATTACTACTGTTATTAATATACGATCAGCAGGAATTACTTTAgatcgattacctttatttgtttgatctgttgtaatt	Ochlerotatus dorsalis voucher BIOUG<CAN>:10BBCDIP-2307 cytochrome oxidase subunit 1 (COI) gene, partial cds; mitochondrial
JF868953	658	species	1205942	Ochlerotatus sierrensis	190765	Ochlerotatus	7157	Culicidae	2759	Eukaryota	D	GGAGCTGGTACAGGATGAAC	0	GATCAAACAAATAAAGGTAATCGATC	0	154	agtagaaaatggagctggtacaggatgaacTGTTTACCCCCCTCTCTCATCAATTCCTGCCCATGCAGGAGCTTCAGTTGATTTAACAATTTTTTCTCTTCATTTAGCTGGAGTATCATCAATTTTAGGAGCAGTAAATTTTATTACTACTGTTATTAATATGCGATCTTCTGGTATTACTTTAgatcgattacctttatttgtttgatccgttgtaatt	Ochlerotatus sierrensis voucher BIOUG<CAN>:10BBCDIP-2306 cytochrome oxidase subunit 1 (COI) gene, partial cds; mitochondrial
JF868952	658	species	329099	Ochlerotatus communis	190765	Ochlerotatus	7157	Culicidae	2759	Eukaryota	D	GGATCAGGAACAGGATGAAC	0	GATCAAACAAATAAAGGTAATCGATC	0	154	ggttgaaaatggatcaggaacaggatgaacTGTGTACCCACCTCTTTCTTCTGGAACTGCTCACGCAGGAGCTTCAGTTGATTTAACAATTTTTTCTCTTCATTTAGCAGGAATTTCATCAATTTTAGGAGCAGTAAATTTTATTACTACTGTTATTAATATACGATCTTCAGGAATTACATTAgatcgattacctttatttgtttgatctgttgtaatt	Ochlerotatus communis voucher BIOUG<CAN>:10BBCDIP-2305 cytochrome oxidase subunit 1 (COI) gene, partial cds; mitochondrial
JF868951	658	species	28624	Aedes atropalpus	7158	Aedes	7157	Culicidae	2759	Eukaryota	D	GGATCAGGTACAGGGTGAAC	0	GATCATACAAATAAAGGTAATCGATC	0	154	agtagaaaatggatcaggtacagggtgaacTGTTTACCCACCTTTATCATCTGGTACTGCTCATGCAGGAGCATCAGTAGATTTAACAATTTTTTCTCTTCATTTAGCTGGAATTTCTTCAATTTTAGGAGCTGTAAATTTTATTACAACTGTAATTAATATGCGATCATCAGGAATTACTTTAgatcgattacctttatttgtatgatctgtagtaatc	Aedes atropalpus voucher BIOUG<CAN>:10BBCDIP-2304 cytochrome oxidase subunit 1 (COI) gene, partial cds; mitochondrial
JF868948	658	species	49923	Anopheles walkeri	7164	Anopheles	7157	Culicidae	2759	Eukaryota	D	GGGGCAGGTACAGGATGAAC	0	GATCAAACAAATAAAGGTATTCGGTC	1	154	agtagaaaatggggcaggtacaggatgaacAGTTTATCCCCCTTTATCCTCAGGAATTGCTCACGCAGGGGCTTCTGTAGATTTAGCTATTTTTTCTCTTCACTTAGCTGGGATTTCTTCTATTTTAGGGGCTGTAAATTTTATTACTACAGTTATTAATATACGATCTCCTGGGGTTACTTTAgaccgaatacctttatttgtttgatcagtggtaatt	Anopheles walkeri voucher BIOUG<CAN>:10BBCDIP-2301 cytochrome oxidase subunit 1 (COI) gene, partial cds; mitochondrial
JF868947	658	species	1205942	Ochlerotatus sierrensis	190765	Ochlerotatus	7157	Culicidae	2759	Eukaryota	D	GGAGCTGGTACAGGATGAAC	0	GATCAAACAAATAAAGGTAATCGATC	0	154	agtagaaaatggagctggtacaggatgaacTGTTTACCCCCCTCTCTCATCAATTCCTGCCCATGCAGGAGCTTCAGTTGATTTAACAATTTTTTCTCTTCATTTAGCTGGAGTCTCATCAATTTTAGGAGCAGTAAATTTTATTACTACTGTTATTAATATGCGATCTTCTGGTATTACTTTAgatcgattacctttatttgtttgatccgttgtaatt	Ochlerotatus sierrensis voucher BIOUG<CAN>:10BBCDIP-2300 cytochrome oxidase subunit 1 (COI) gene, partial cds; mitochondrial
JF868944	658	species	329099	Ochlerotatus communis	190765	Ochlerotatus	7157	Culicidae	2759	Eukaryota	D	GGGTCAGGGACAGGATGAAC	0	GATCAAACAAATAAGGGTAATCGATC	1	154	ggttgaaaatgggtcagggacaggatgaacTGTATACCCACCTCTTTCTTCTGGGACTGCTCACGCAGGAGCTTCAGTTGATTTAACAATTTTTTCTCTTCATTTAGCAGGAGTGTCATCAATTTTAGGAGCAGTAAATTTTATTACTACTGTTATTAATATACGATCTTCAGGAATTACATTAgatcgattacccttatttgtttgatctgttgtaatt	Ochlerotatus communis voucher BIOUG<CAN>:10BBCDIP-2297 cytochrome oxidase subunit 1 (COI) gene, partial cds; mitochondrial
JF868943	658	species	663928	Ochlerotatus dorsalis	190765	Ochlerotatus	7157	Culicidae	2759	Eukaryota	D	GGATCAGGAACAGGATGAAC	0	GATCAAACAAATAAAGGTAATCGATC	0	154	agtagaaaatggatcaggaacaggatgaacAGTTTATCCACCTCTTTCATCTGGAACTGCTCATGCAGGAGCTTCAGTTGATTTAACAATTTTTTCTTTACATTTAGCTGGAGTATCATCAATTTTAGGAGCAGTAAATTTTATTACTACTGTAATTAATATACGATCAGCAGGAATTACTTTAgatcgattacctttatttgtttgatctgttgtaatt	Ochlerotatus dorsalis voucher BIOUG<CAN>:10BBCDIP-2295 cytochrome oxidase subunit 1 (COI) gene, partial cds; mitochondrial
JF868942	658	species	7163	Aedes vexans	7158	Aedes	7157	Culicidae	2759	Eukaryota	D	GGAGCAGGGACAGGATGAAC	0	GATCAAACAAATAAAGGTAATCGATC	0	154	agtagaaaatggagcagggacaggatgaacAGTTTATCCTCCTCTTTCATCAGGAACAGCTCACGCTGGAGCTTCTGTTGATTTAGCAATTTTCTCTCTTCATTTAGCAGGGATTTCATCTATTTTAGGAGCAGTAAATTTTATTACTACTGTTATTAATATACGATCATCTGGGATTACTTTAgatcgattacctttatttgtttgatctgtagtaatt	Aedes vexans voucher BIOUG<CAN>:10BBCDIP-2294 cytochrome oxidase subunit 1 (COI) gene, partial cds; mitochondrial
JF868940	658	species	228917	Ochlerotatus canadensis	190765	Ochlerotatus	7157	Culicidae	2759	Eukaryota	D	GGGTCAGGGACAGGATGAAC	0	GATCAAACAAATAAAGGTAAACGATC	1	154	agtagaaaatgggtcagggacaggatgaacTGTTTATCCCCCTCTTTCATCTGGAACTGCTCACGCAGGAGCTTCAGTAGATTTAACAATTTTTTCTCTTCATTTAGCTGGAGTATCTTCTATTTTAGGAGCAGTAAATTTTATTACAACTGTTATTAATATACGATCAGCAGGAATTACTTTAgatcgtttacctttatttgtttgatctgttgtaatt	Ochlerotatus canadensis voucher BIOUG<CAN>:10BBCDIP-2292 cytochrome oxidase subunit 1 (COI) gene, partial cds; mitochondrial
JF868939	658	species	743691	Ochlerotatus fitchii	190765	Ochlerotatus	7157	Culicidae	2759	Eukaryota	D	GGTTCAGGAACAGGATGAAC	1	GATCATACAAATAAAGGTAATCGATC	0	154	agtagaaaatggttcaggaacaggatgaacAGTTTACCCTCCTCTTTCTTCTGGAACTGCTCATGCTGGAGCTTCAGTTGATTTAACTATTTTTTCTCTTCATTTAGCCGGAGTATCTTCAATTTTAGGAGCTGTAAATTTTATTACTACTGTTATTAATATACGATCTTCAGGAATTACTTTAgatcgattacctttatttgtatgatctgttgtaatt	Ochlerotatus fitchii voucher BIOUG<CAN>:10BBCDIP-2291 cytochrome oxidase subunit 1 (COI) gene, partial cds; mitochondrial
JF868938	658	species	743691	Ochlerotatus fitchii	190765	Ochlerotatus	7157	Culicidae	2759	Eukaryota	D	GGTTCAGGAACAGGATGAAC	1	GATCATACAAATAAAGGTAATCGATC	0	154	agtagaaaatggttcaggaacaggatgaacAGTTTATCCTCCTCTTTCTTCTGGAACTGCTCATGCTGGGGCTTCAGTTGATTTAACTATTTTTTCTCTTCATTTAGCCGGAGTATCTTCAATTTTAGGAGCTGTAAATTTTATTACTACTGTTATTAATATACGATCTTCAGGAATTACTTTAgatcgattacctttatttgtatgatctgttgtaatt	Ochlerotatus fitchii voucher BIOUG<CAN>:10BBCDIP-2290 cytochrome oxidase subunit 1 (COI) gene, partial cds; mitochondrial
JF868936	658	species	329099	Ochlerotatus communis	190765	Ochlerotatus	7157	Culicidae	2759	Eukaryota	D	GGATCAGGAACAGGATGAAC	0	GATCAAACAAATAAAGGTAATCGATC	0	154	ggttgaaaatggatcaggaacaggatgaacTGTGTACCCACCTCTTTCTTCTGGAACTGCTCACGCAGGAGCTTCAGTTGATTTAACAATTTTTTCTCTTCATTTAGCAGGAATTTCATCAATTTTAGGAGCAGTAAATTTTATTACTACTGTTATTAATATACGATCTTCAGGAATTACATTAgatcgattacctttatttgtttgatctgttgtaatt	Ochlerotatus communis voucher BIOUG<CAN>:10BBCDIP-2288 cytochrome oxidase subunit 1 (COI) gene, partial cds; mitochondrial
JF868935	658	species	743691	Ochlerotatus fitchii	190765	Ochlerotatus	7157	Culicidae	2759	Eukaryota	D	GGTTCAGGAACAGGATGAAC	1	GATCATACAAATAAAGGTAATCGATC	0	154	agtagaaaatggttcaggaacaggatgaacAGTTTATCCTCCTCTTTCTTCTGGAACTGCTCATGCTGGGGCTTCAGTTGATTTAACTATTTTTTCTCTTCATTTAGCCGGAGTATCTTCAATTTTAGGAGCTGTAAATTTTATTACTACTGTTATTAATATACGATCTTCAGGAATTACTTTAgatcgattacctttatttgtatgatctgttgtaatt	Ochlerotatus fitchii voucher BIOUG<CAN>:10BBCDIP-2287 cytochrome oxidase subunit 1 (COI) gene, partial cds; mitochondrial
JF868933	658	species	329099	Ochlerotatus communis	190765	Ochlerotatus	7157	Culicidae	2759	Eukaryota	D	GGATCAGGAACAGGATGAAC	0	GATCAAACAAATAAAGGTAATCGATC	0	154	ggttgaaaatggatcaggaacaggatgaacTGTGTACCCACCTCTTTCTTCTGGAACTGCTCACGCAGGAGCTTCAGTTGATTTAACAATTTTTTCTCTTCATTTAGCAGGAATTTCATCAATTTTAGGAGCAGTAAATTTTATTACTACTGTTATTAATATACGATCTTCAGGAATTACATTAgatcgattacctttatttgtttgatctgttgtaatt	Ochlerotatus communis voucher BIOUG<CAN>:10BBCDIP-2285 cytochrome oxidase subunit 1 (COI) gene, partial cds; mitochondrial
JF868932	658	species	329099	Ochlerotatus communis	190765	Ochlerotatus	7157	Culicidae	2759	Eukaryota	D	GGATCAGGAACAGGATGAAC	0	GATCAAACAAATAAAGGTAATCGATC	0	154	ggttgaaaatggatcaggaacaggatgaacTGTGTACCCACCTCTTTCTTCTGGAACTGCTCACGCAGGAGCTTCAGTTGATTTAACAATTTTTTCTCTTCATTTAGCAGGAATTTCATCAATTTTAGGAGCAGTAAATTTTATTACTACTGTTATTAATATACGATCTTCAGGAATTACATTAgatcgattacctttatttgtttgatctgttgtaatt	Ochlerotatus communis voucher BIOUG<CAN>:10BBCDIP-2284 cytochrome oxidase subunit 1 (COI) gene, partial cds; mitochondrial
JF868927	658	species	1205942	Ochlerotatus sierrensis	190765	Ochlerotatus	7157	Culicidae	2759	Eukaryota	D	GGAGCTGGTACAGGATGAAC	0	GATCAAACAAATAAAGGTAATCGATC	0	154	agtagaaaatggagctggtacaggatgaacTGTTTACCCCCCTCTCTCATCAATTCCTGCCCATGCAGGAGCTTCAGTTGATTTAACAATTTTTTCTCTTCATTTAGCTGGAGTATCATCAATTTTAGGAGCAGTAAATTTTATTACTACTGTTATTAATATGCGATCTTCTGGTATTACTTTAgatcgattacctttatttgtttgatccgttgtaatt	Ochlerotatus sierrensis voucher BIOUG<CAN>:10BBCDIP-2279 cytochrome oxidase subunit 1 (COI) gene, partial cds; mitochondrial
JF868926	658	species	1205942	Ochlerotatus sierrensis	190765	Ochlerotatus	7157	Culicidae	2759	Eukaryota	D	GGAGCTGGTACAGGATGAAC	0	GATCAAACAAATAAAGGTAATCGATC	0	154	agtagaaaatggagctggtacaggatgaacTGTTTACCCCCCTCTCTCATCAATTCCTGCCCATGCAGGAGCTTCAGTTGATTTAACAATTTTTTCTCTTCATTTAGCTGGAGTATCATCAATTTTAGGAGCAGTAAATTTTATTACTACTGTTATTAATATGCGATCTTCTGGTATTACTTTAgatcgattacctttatttgtttgatccgttgtaatt	Ochlerotatus sierrensis voucher BIOUG<CAN>:10BBCDIP-2278 cytochrome oxidase subunit 1 (COI) gene, partial cds; mitochondrial
JF868919	658	species	228917	Ochlerotatus canadensis	190765	Ochlerotatus	7157	Culicidae	2759	Eukaryota	D	GGGTCAGGGACAGGATGAAC	0	GATCAAACAAATAAAGGTAAACGATC	1	154	agtagaaaatgggtcagggacaggatgaacTGTTTATCCCCCTCTTTCATCTGGAACTGCTCACGCAGGAGCTTCAGTAGATTTAACAATTTTTTCTCTTCATTTAGCTGGAGTATCTTCTATTTTAGGAGCAGTAAATTTTATTACAACTGTTATTAATATACGATCAGCAGGAATTACTTTAgatcgtttacctttatttgtttgatctgttgtaatt	Ochlerotatus canadensis voucher BIOUG<CAN>:10BBCDIP-2271 cytochrome oxidase subunit 1 (COI) gene, partial cds; mitochondrial
JF868918	658	species	743691	Ochlerotatus fitchii	190765	Ochlerotatus	7157	Culicidae	2759	Eukaryota	D	GGTTCAGGAACAGGATGAAC	1	GATCATACAAATAAAGGTAATCGATC	0	154	agtagaaaatggttcaggaacaggatgaacAGTTTACCCTCCTCTTTCTTCTGGAACTGCTCATGCTGGAGCTTCAGTTGATTTAACTATTTTTTCTCTTCATTTAGCCGGAGTATCTTCAATTTTAGGAGCTGTAAATTTTATTACTACTGTTATTAATATACGATCTTCAGGAATTACTTTAgatcgattacctttatttgtatgatctgttgtaatt	Ochlerotatus fitchii voucher BIOUG<CAN>:10BBCDIP-2270 cytochrome oxidase subunit 1 (COI) gene, partial cds; mitochondrial
JF868917	658	species	7163	Aedes vexans	7158	Aedes	7157	Culicidae	2759	Eukaryota	D	GGAGCAGGGACAGGATGAAC	0	GATCAAACAAATAAAGGTAATCGATC	0	154	agtagaaaatggagcagggacaggatgaacAGTTTATCCTCCTCTTTCATCAGGAACAGCTCACGCTGGAGCTTCTGTTGATTTAGCAATTTTCTCTCTTCATTTAGCAGGAATTTCATCTATTTTAGGAGCAGTAAATTTTATTACTACTGTTATTAATATACGATCATCTGGAATTACTTTAgatcgattacctttatttgtttgatctgtagtaatt	Aedes vexans voucher BIOUG<CAN>:10BBCDIP-2269 cytochrome oxidase subunit 1 (COI) gene, partial cds; mitochondrial
JF868916	658	species	7163	Aedes vexans	7158	Aedes	7157	Culicidae	2759	Eukaryota	D	GGAGCAGGGACAGGATGAAC	0	GATCAAACAAATAAAGGTAATCGATC	0	154	agtagaaaatggagcagggacaggatgaacAGTTTATCCTCCTCTTTCATCAGGAACAGCTCACGCTGGAGCTTCTGTTGATTTAGCAATTTTCTCTCTTCATTTAGCAGGAATTTCATCTATTTTAGGAGCAGTAAATTTTATTACTACTGTTATTAATATACGATCATCTGGAATTACTTTAgatcgattacctttatttgtttgatctgtagtaatt	Aedes vexans voucher BIOUG<CAN>:10BBCDIP-2268 cytochrome oxidase subunit 1 (COI) gene, partial cds; mitochondrial
JF868914	658	species	1205942	Ochlerotatus sierrensis	190765	Ochlerotatus	7157	Culicidae	2759	Eukaryota	D	GGAGCTGGTACAGGATGAAC	0	GATCAAACAAATAAAGGTAATCGATC	0	154	agtagaaaatggagctggtacaggatgaacTGTTTACCCCCCTCTCTCATCAATTCCTGCCCATGCAGGAGCTTCAGTTGATTTAACAATTTTTTCTCTTCATTTAGCTGGAGTATCATCAATTTTAGGAGCAGTAAATTTTATTACTACTGTTATTAATATGCGATCTTCTGGTATTACTTTAgatcgattacctttatttgtttgatccgttgtaatt	Ochlerotatus sierrensis voucher BIOUG<CAN>:10BBCDIP-2266 cytochrome oxidase subunit 1 (COI) gene, partial cds; mitochondrial
JF868913	658	species	1205942	Ochlerotatus sierrensis	190765	Ochlerotatus	7157	Culicidae	2759	Eukaryota	D	GGAGCTGGTACAGGATGAAC	0	GATCAAACAAATAAAGGTAATCGATC	0	154	agtagaaaatggagctggtacaggatgaacTGTTTACCCCCCTCTCTCATCAATTCCTGCCCATGCAGGAGCTTCAGTTGATTTAACAATTTTTTCTCTTCATTTAGCTGGAGTATCATCAATTTTAGGAGCAGTAAATTTTATTACTACTGTTATTAATATGCGATCTTCTGGTATTACTTTAgatcgattacctttatttgtttgatccgttgtaatt	Ochlerotatus sierrensis voucher BIOUG<CAN>:10BBCDIP-2265 cytochrome oxidase subunit 1 (COI) gene, partial cds; mitochondrial
JF868912	658	species	1205942	Ochlerotatus sierrensis	190765	Ochlerotatus	7157	Culicidae	2759	Eukaryota	D	GGAGCTGGTACAGGATGAAC	0	GATCAAACAAATAAAGGTAATCGATC	0	154	agtagaaaatggagctggtacaggatgaacTGTTTACCCCCCTCTCTCATCAATTCCTGCCCATGCAGGAGCTTCAGTTGATTTAACAATTTTTTCTCTTCATTTAGCTGGAGTATCATCAATTTTAGGAGCAGTAAATTTTATTACTACTGTTATTAATATGCGATCTTCTGGTATTACTTTAgatcgattacctttatttgtttgatccgttgtaatt	Ochlerotatus sierrensis voucher BIOUG<CAN>:10BBCDIP-2264 cytochrome oxidase subunit 1 (COI) gene, partial cds; mitochondrial
JF867907	658	species	7163	Aedes vexans	7158	Aedes	7157	Culicidae	2759	Eukaryota	D	GGAGCAGGGACAGGATGAAC	0	GATCAAACAAATAAAGGTAATCGATC	0	154	agtagaaaatggagcagggacaggatgaacAGTTTATCCTCCTCTTTCATCAGGAACAGCTCACGCTGGAGCTTCTGTTGATTTAGCAATTTTCTCTCTTCATTTAGCAGGAATTTCATCTATTTTAGGAGCAGTAAATTTTATTACTACTGTTATTAATATACGATCATCTGGAATTACTTTAgatcgattacctttatttgtttgatctgtagtaatt	Aedes vexans voucher BIOUG<CAN>:10BBCDIP-0097 cytochrome oxidase subunit 1 (COI) gene, partial cds; mitochondrial
JF867811	658	species	7163	Aedes vexans	7158	Aedes	7157	Culicidae	2759	Eukaryota	D	GGAGCAGGGACAGGATGAAC	0	GATCAAACAAATAAAGGTAATCGATC	0	154	agtagaaaatggagcagggacaggatgaacAGTTTATCCTCCTCTTTCATCAGGAACAGCTCACGCTGGAGCTTCTGTTGATTTAGCAATTTTCTCTCTTCATTTAGCAGGAATTTCATCTATTTTAGGAGCAGTAAATTTTATTACTACTGTTATTAATATGCGATCATCTGGGATTACTTTAgatcgattacctttatttgtttgatctgtagtaatt	Aedes vexans voucher BIOUG<CAN>:PCPP10-0328 cytochrome oxidase subunit 1 (COI) gene, partial cds; mitochondrial
JF867746	658	species	7163	Aedes vexans	7158	Aedes	7157	Culicidae	2759	Eukaryota	D	GGAGCAGGGACAGGATGAAC	0	GATCAAACAAATAAAGGTAATCGATC	0	154	agtagaaaatggagcagggacaggatgaacAGTTTATCCTCCTCTTTCATCAGGAACAGCTCACGCTGGAGCTTCTGTTGATTTAGCAATTTTCTCTCTTCATTTAGCAGGGATTTCATCTATTTTAGGAGCAGTAAATTTTATTACTACTGTTATTAATATACGATCATCTGGGATTACTTTAgatcgattacctttatttgtttgatctgtagtaatt	Aedes vexans voucher BIOUG<CAN>:PCPP10-0260 cytochrome oxidase subunit 1 (COI) gene, partial cds; mitochondrial
JF867717	620	species	7163	Aedes vexans	7158	Aedes	7157	Culicidae	2759	Eukaryota	D	GGAGCAGGGACAGGATGAAC	0	GATCAAACAAATAAAGGTAATCGATC	0	154	agtagaaaatggagcagggacaggatgaacAGTTTATCCTCCTCTTTCATCAGGAACAGCTCATGCTGGAGCTTCTGTTGATTTAGCAATTTTCTCTCTTCATTTAGCAGGAATTTCATCTATTTTAGGAGCAGTAAATTTTATTACTACTGTTATTAATATACGATCATCTGGAATTACTTTAgatcgattacctttatttgtttgatctgtagtaatt	Aedes vexans voucher BIOUG<CAN>:PCPP10-0228 cytochrome oxidase subunit 1 (COI) gene, partial cds; mitochondrial
JF867716	658	species	7163	Aedes vexans	7158	Aedes	7157	Culicidae	2759	Eukaryota	D	GGAGCAGGGACAGGATGAAC	0	GATCAAACAAATAAAGGTAATCGATC	0	154	agtagaaaatggagcagggacaggatgaacAGTTTATCCTCCTCTTTCATCAGGAACAGCTCACGCTGGAGCTTCTGTTGATTTAGCAATTTTCTCTCTTCATTTAGCAGGAATTTCATCTATTTTAGGAGCAGTAAATTTTATTACTACTGTTATTAATATACGATCATCTGGAATTACTTTAgatcgattacctttatttgtttgatctgtagtaatt	Aedes vexans voucher BIOUG<CAN>:PCPP10-0227 cytochrome oxidase subunit 1 (COI) gene, partial cds; mitochondrial
JF867705	658	species	7163	Aedes vexans	7158	Aedes	7157	Culicidae	2759	Eukaryota	D	GGAGCAGGGACAGGATGAAC	0	GATCAAACAAATAAAGGTAATCGATC	0	154	agtagaaaatggagcagggacaggatgaacAGTTTATCCTCCTCTTTCATCAGGAACAGCTCACGCTGGAGCTTCTGTTGATTTAGCAATTTTCTCTCTTCATTTAGCAGGGATTTCATCTATTTTAGGAGCAGTAAATTTTATTACTACTGTTATTAATATACGATCATCTGGGATTACTTTAgatcgattacctttatttgtttgatctgtagtaatt	Aedes vexans voucher BIOUG<CAN>:PCPP10-0216 cytochrome oxidase subunit 1 (COI) gene, partial cds; mitochondrial
JF867021	658	species	7163	Aedes vexans	7158	Aedes	7157	Culicidae	2759	Eukaryota	D	GGGGCAGGGACAGGATGAAC	0	GATCAAACAAATAAAGGTAATCGGTC	1	154	agtagaaaatggggcagggacaggatgaacAGTTTATCCTCCTCTTTCATCAGGAACAGCTCACGCTGGAGCTTCTGTTGATTTAGCAATTTTCTCTCTTCATTTAGCAGGAATTTCATCTATTTTAGGAGCAGTAAATTTTATTACTACTGTTATTAATATACGATCATCTGGAATTACTTTAgaccgattacctttatttgtttgatctgtagtaatt	Aedes vexans voucher BIOUG<CAN>:10BBCDIP-0925 cytochrome oxidase subunit 1 (COI) gene, partial cds; mitochondrial
HQ982346	658	species	7163	Aedes vexans	7158	Aedes	7157	Culicidae	2759	Eukaryota	D	GGAGCAGGGACAGGATGAAC	0	GATCAAACAAATAAAGGTAATCGGTC	1	154	agtagaaaatggagcagggacaggatgaacAGTTTATCCTCCTCTTTCATCAGGAACAGCTCACGCTGGAGCTTCTGTTGATTTAGCAATTTTCTCTCTTCATTTAGCAGGAATTTCATCTATTTTAGGAGCAGTAAATTTTATTACTACTGTTATTAATATACGATCATCTGGAATTACTTTAgaccgattacctttatttgtttgatctgtagtaatt	Aedes vexans voucher BIOUG<CAN>:08TTML-2366 cytochrome oxidase subunit 1 (COI) gene, partial cds; mitochondrial
HQ981277	658	species	7163	Aedes vexans	7158	Aedes	7157	Culicidae	2759	Eukaryota	D	GGAGCAGGGACAGGATGAAC	0	GATCAAACAAATAAAGGTAATCGATC	0	154	agtagaaaatggagcagggacaggatgaacAGTTTATCCTCCTCTTTCATCAGGAACAGCTCACGCTGGAGCTTCTGTTGATTTAGCAATTTTCTCTCTTCATTTAGCAGGAATTTCATCTATTTTAGGAGCAGTAAATTTTATTACTACTGTTATTAATATACGATCATCTGGAATTACTTTAgatcgattacctttatttgtttgatctgtagtaatt	Aedes vexans voucher BIOUG<CAN>:08BBDIP-0699 cytochrome oxidase subunit 1 (COI) gene, partial cds; mitochondrial
HQ962069	658	species	329100	Ochlerotatus abserratus	190765	Ochlerotatus	7157	Culicidae	2759	Eukaryota	D	GGGTCAGGGACAGGTTGAAC	0	GATCATACAAATAAAGGTAATCGATC	0	154	ggttgaaaatgggtcagggacaggttgaacGGTGTACCCACCTCTTTCTTCTGGAACTGCCCATGCAGGAGCTTCAGTTGATTTAACAATTTTTTCTCTTCATTTAGCGGGGATCTCTTCAATTTTAGGAGCAGTAAATTTTATTACTACTGTTATTAATATGCGATCTTCAGGGATTACATTAgatcgattacctttatttgtatgatccgttgtaatt	Ochlerotatus abserratus voucher BIOUG<CAN>:09PROBE-JW0072 cytochrome oxidase subunit 1 (COI) gene, partial cds; mitochondrial
HQ962054	617	species	329100	Ochlerotatus abserratus	190765	Ochlerotatus	7157	Culicidae	2759	Eukaryota	D	GGGTCAGGGACAGGTTGAAC	0	GATCATACAAATAAAGGTAATCGATC	0	154	ggttgaaaatgggtcagggacaggttgaacGGTGTACCCACCTCTTTCTTCTGGAACTGCCCATGCAGGAGCTTCAGTTGATTTAACAATTTTTTCTCTTCATTTAGCGGGGATCTCTTCAATTTTAGGAGCAGTAAATTTTATTACTACTGTTATTAATATGCGATCTTCAGGGATTACATTAgatcgattacctttatttgtatgatccgttgtaatt	Ochlerotatus abserratus voucher BIOUG<CAN>:09PROBE-JW0055 cytochrome oxidase subunit 1 (COI) gene, partial cds; mitochondrial
HQ962053	658	species	329100	Ochlerotatus abserratus	190765	Ochlerotatus	7157	Culicidae	2759	Eukaryota	D	GGGTCAGGGACAGGTTGAAC	0	GATCATACAAATAAAGGTAATCGATC	0	154	ggttgaaaatgggtcagggacaggttgaacGGTGTACCCACCTCTTTCTTCTGGAACTGCCCATGCAGGAGCTTCAGTTGATTTAACAATTTTTTCTCTTCATTTAGCGGGGATCTCTTCAATTTTAGGAGCAGTAAATTTTATTACTACTGTTATTAATATGCGATCTTCAGGGATTACATTAgatcgattacctttatttgtatgatccgttgtaatt	Ochlerotatus abserratus voucher BIOUG<CAN>:09PROBE-JW0054 cytochrome oxidase subunit 1 (COI) gene, partial cds; mitochondrial
JF309320	426	species	7160	Aedes albopictus	7158	Aedes	7157	Culicidae	2759	Eukaryota	R	GGAGCTGGAACAGGGTGAAC	0	GATCATACAAATAAAGGTAGTCGATC	1	154	agtagaaaacggagctggaacagggtgaacGGTTTATCCTCCCCTTTCTTCTGGAACAGCTCATGCTGGGGCTTCAGTTGATTTAGCAATTTTTTCTTTACATTTAGCGGGAATCTCATCTATTTTAGGAGCAGTAAATTTTATTACAACTGTAATTAATATACGATCAGCTGGTATTACTCTTgatcgactacctttatttgtatgatcagtagtaatt	Aedes albopictus isolate POUMA cytochrome oxidase subunit 1 (COI) gene, partial cds; mitochondrial
JF309319	426	species	7160	Aedes albopictus	7158	Aedes	7157	Culicidae	2759	Eukaryota	R	GGAGCTGGAACAGGGTGAAC	0	GATCACACAAATAAAGGTAGTCGATC	2	154	agtagaaaacggagctggaacagggtgaacGGTTTATCCTCCCCTTTCTTCTGGAACAGCTCATGCTGGGGCTTCAGTTGATTTAGCAATTTTTTCTTTACATTTAGCGGGAATCTCATCTATTTTAGGAGCAGTAAATTTCATTACAACTGTAATTAATATACGATCAGCTGGTATTACTCTTgatcgactacctttatttgtgtgatcagtagtaatt	Aedes albopictus isolate BUEA23 cytochrome oxidase subunit 1 (COI) gene, partial cds; mitochondrial
JF309318	426	species	7160	Aedes albopictus	7158	Aedes	7157	Culicidae	2759	Eukaryota	R	GGAGCTGGAACAGGGTGAAC	0	GATCACACAAATAAAGGTAGTCGATC	2	154	agtagaaaacggagctggaacagggtgaacGGTTTATCCTCCCCTTTCTTCTGGAACAGCTCATGCTGGGGCTTCAGTTGATTTAGCAATTTTTTCTTTACATTTAGCGGGAATCTCATCTATTTTAGGAGCAGTAAATTTTATTACAACTGTAATTAATATACGATCAGCTGGTATTACTCTTgatcgactacctttatttgtgtgatcagtagtaatt	Aedes albopictus isolate BERTOUA cytochrome oxidase subunit 1 (COI) gene, partial cds; mitochondrial
JF309317	426	species	7160	Aedes albopictus	7158	Aedes	7157	Culicidae	2759	Eukaryota	R	GGAGCTGGAACAGGGTGAAC	0	GATCACACAAATAAAGGTAGTCGATC	2	154	agtagaaaacggagctggaacagggtgaacGGTTTATCCTCCCCTTTCTTCTGGAACAGCTCATGCTGGGGCTTCAGTTGATTTAGCAATTTTTTCTTTACATTTAGCGGGAATCTCATCTATTTTAGGAGCAGTAAATTTTATTACAACTGTAATTAATATACGATCAGCTGGTATTACTCTTgatcgactacctttatttgtgtgatcagtagtaatt	Aedes albopictus isolate BUEA1 cytochrome oxidase subunit 1 (COI) gene, partial cds; mitochondrial
GU908054	639	species	49923	Anopheles walkeri	7164	Anopheles	7157	Culicidae	2759	Eukaryota	D	GGGGCAGGTACAGGATGAAC	0	GATCAAACAAATAAAGGTATTCGGTC	1	154	agtagaaaatggggcaggtacaggatgaacAGTTTATCCTCCTTTATCTTCAGGAATTGCTCACGCAGGGGCTTCTGTAGATTTAGCTATTTTTTCTCTTCACTTAGCTGGAATTTCTTCTATTTTAGGGGCTGTAAATTTTATTACTACAGTTATTAATATACGATCTCCTGGGATTACTTTAgaccgaatacctttatttgtttgatcggtggtaatt	Anopheles walkeri voucher mosqWK22 cytochrome oxidase subunit 1 (COI) gene, partial cds; mitochondrial
GU908053	639	species	49923	Anopheles walkeri	7164	Anopheles	7157	Culicidae	2759	Eukaryota	D	GGGGCAGGTACAGGATGAAC	0	GATCAAACAAATAAAGGTATTCGGTC	1	154	agtagaaaatggggcaggtacaggatgaacAGTTTATCCTCCTTTATCTTCAGGAATTGCTCACGCAGGGGCTTCTGTAGATTTAGCTATTTTTTCTCTTCACTTAGCTGGAATTTCTTCTATTTTAGGGGCTGTAAATTTTATTACTACAGTTATTAATATACGATCTCCTGGGATTACTTTAgaccgaatacctttatttgtttgatcggtggtaatt	Anopheles walkeri voucher mosqWK21 cytochrome oxidase subunit 1 (COI) gene, partial cds; mitochondrial
GU908052	639	species	49923	Anopheles walkeri	7164	Anopheles	7157	Culicidae	2759	Eukaryota	D	GGGGCAGGTACAGGATGAAC	0	GATCAAACAAATAAAGGTATTCGGTC	1	154	agtagaaaatggggcaggtacaggatgaacAGTTTATCCTCCTTTATCTTCAGGAATTGCTCACGCAGGGGCTTCTGTAGATTTAGCTATTTTTTCTCTTCACTTAGCTGGAATTTCTTCTATTTTAGGGGCTGTAAATTTTATTACTACAGTTATTAATATACGATCTCCTGGGATTACTTTAgaccgaatacctttatttgtttgatcggtggtaatt	Anopheles walkeri voucher mosqWK19 cytochrome oxidase subunit 1 (COI) gene, partial cds; mitochondrial
GU908051	639	species	49923	Anopheles walkeri	7164	Anopheles	7157	Culicidae	2759	Eukaryota	D	GGGGCAGGTACAGGATGAAC	0	GATCAAACAAATAAAGGTATTCGGTC	1	154	agtagaaaatggggcaggtacaggatgaacAGTTTATCCTCCTTTATCTTCAGGAATTGCTCACGCAGGGGCTTCTGTAGATTTAGCTATTTTTTCTCTTCACTTAGCTGGAATTTCTTCTATTTTAGGGGCTGTAAATTTTATTACTACAGTTATTAATATACGATCTCCTGGGATTACTTTAgaccgaatacctttatttgtttgatcggtggtaatt	Anopheles walkeri voucher mosqC1-14 cytochrome oxidase subunit 1 (COI) gene, partial cds; mitochondrial
GU908050	639	species	49923	Anopheles walkeri	7164	Anopheles	7157	Culicidae	2759	Eukaryota	D	GGGGCAGGTACAGGATGAAC	0	GATCAAACAAATAAAGGTATTCGGTC	1	154	agtagaaaatggggcaggtacaggatgaacAGTTTATCCTCCTTTATCTTCAGGAATTGCTCACGCAGGGGCTTCTGTAGATTTAGCTATTTTTTCTCTTCACTTAGCTGGAATTTCTTCTATTTTAGGGGCTGTAAATTTTATTACTACAGTTATTAATATACGATCTCCTGGGGTTACTTTAgaccgaatacctttatttgtttgatcggtggtaatt	Anopheles walkeri voucher mosq182-41 cytochrome oxidase subunit 1 (COI) gene, partial cds; mitochondrial
GU908049	639	species	49923	Anopheles walkeri	7164	Anopheles	7157	Culicidae	2759	Eukaryota	D	GGGGCAGGTACAGGATGAAC	0	GATCAAACAAATAAAGGTATTCGGTC	1	154	agtagaaaatggggcaggtacaggatgaacAGTTTATCCTCCTTTATCTTCAGGAATTGCTCACGCAGGGGCTTCTGTAGATTTAGCTATTTTTTCTCTTCACTTAGCTGGAATTTCTTCTATTTTAGGGGCTGTAAATTTTATTACTACAGTTATTAATATACGATCTCCTGGGGTTACTTTAgaccgaatacctttatttgtttgatcggtggtaatt	Anopheles walkeri voucher mosq182-15 cytochrome oxidase subunit 1 (COI) gene, partial cds; mitochondrial
GU908046	639	species	30069	Anopheles stephensi	7164	Anopheles	7157	Culicidae	2759	Eukaryota	D	GGAGCAGGAACAGGATGAAC	0	GATCAAACGAATAAAGGTATTCGGTC	2	154	agtagaaaatggagcaggaacaggatgaacTGTTTATCCGCCTTTATCGTCTGGAATTGCTCACGCTGGGGCTTCAGTAGATTTAGCAATTTTTTCATTACATTTAGCTGGAATTTCTTCAATTTTAGGAGCAGTTAATTTTATTACTACAGTAATTAATATACGATCGCCAGGAATTACGTTAgaccgaatacctttattcgtttgatctgttgtaatt	Anopheles stephensi voucher AF425844 cytochrome oxidase subunit 1 (COI) gene, partial cds; mitochondrial
GU908045	639	species	74873	Anopheles sinensis	7164	Anopheles	7157	Culicidae	2759	Eukaryota	D	GGAGCAGGAACAGGGTGAAC	0	GATCAAACAAATAAAGGTATTCGATC	0	154	agtagaaaatggagcaggaacagggtgaacTGTTTATCCCCCACTTTCATCTGGAATTGCTCATGCTGGAGCATCAGTAGATTTAGCTATTTTTTCATTACATTTAGCTGGGATTTCATCAATTTTAGGAGCAGTAAATTTTATTACAACTGTAATTAATATACGATCTCCAGGAATTACATTAgatcgaatacctttatttgtttgatcagtagtaatt	Anopheles sinensis voucher AY444351 cytochrome oxidase subunit 1 (COI) gene, partial cds; mitochondrial
GU908014	639	species	251639	Anopheles pullus	7164	Anopheles	7157	Culicidae	2759	Eukaryota	D	GGAGCAGGAACAGGGTGAAC	0	GATCATACAAATAAAGGTATTCGATC	0	154	agtagaaaatggagcaggaacagggtgaacTGTTTATCCACCACTTTCATCTGGAATTGCTCATGCTGGGGCATCAGTAGATTTAGCTATTTTTTCACTACATTTAGCAGGGATTTCTTCAATTTTAGGAGCAGTAAATTTTATTACAACTGTAATTAATATACGATCTCCAGGAATTACATTAgatcgaatacctttatttgtatgatcagtagtaatt	Anopheles pullus voucher AY444349 cytochrome oxidase subunit 1 (COI) gene, partial cds; mitochondrial
GU908013	639	species	251639	Anopheles pullus	7164	Anopheles	7157	Culicidae	2759	Eukaryota	D	GGAGCAGGAACAGGGTGAAC	0	GATCATACAAATAAAGGTATTCGATC	0	154	agtagaaaatggagcaggaacagggtgaacTGTTTATCCACCACTTTCATCTGGAATTGCTCATGCTGGAGCATCAGTAGATTTAGCTATTTTTTCACTACATTTAGCAGGGATTTCTTCAATTTTAGGAGCAGTAAATTTTATTACAACTGTAATTAATATACGATCTCCAGGAATTACATTAgatcgaatacctttatttgtatgatcggtagtaatt	Anopheles pullus voucher AY444348 cytochrome oxidase subunit 1 (COI) gene, partial cds; mitochondrial
GU908012	480	species	41430	Anopheles messeae	7164	Anopheles	7157	Culicidae	2759	Eukaryota	D	GGAGCCGGAACAGGGTGAAC	0	GATCATACAAATAAAGGTATTCGATC	0	154	agtagaaaatggagccggaacagggtgaacTGTTTATCCTCCTCTATCCTCTGGAATTGCTCACGCAGGGGCTTCAGTAGATTTAGCTATTTTTTCATTACATTTAGCAGGAATTTCCTCAATTTTAGGAGCTGTAAATTTTATTACAACTGTAATTAATATACGATCTCCTGGAATTACTCTTgatcgaatacctttatttgtatgatctgttgtaatt	Anopheles messeae voucher AL1 cytochrome oxidase subunit 1 (COI) gene, partial cds; mitochondrial
GU908011	480	species	41430	Anopheles messeae	7164	Anopheles	7157	Culicidae	2759	Eukaryota	D	GGAGCCGGAACAGGGTGAAC	0	GATCATACAAATAAAGGTATTCGATC	0	154	agtagaaaatggagccggaacagggtgaacTGTTTATCCTCCTCTATCTTCTGGAATTGCTCACGCAGGAGCTTCAGTAGATTTAGCTATTTTTTCATTACATTTAGCAGGAATTTCCTCAATTTTAGGAGCTGTAAATTTTATTACAACTGTAATTAATATACGATCTCCTGGAATTACTCTTgatcgaatacctttatttgtatgatctgttgtaatt	Anopheles messeae voucher AL2 cytochrome oxidase subunit 1 (COI) gene, partial cds; mitochondrial
GU908008	639	species	7165	Anopheles gambiae	7164	Anopheles	7157	Culicidae	2759	Eukaryota	D	GGGGCTGGAACAGGATGAAC	0	GATCAAACAAATAATGGTATTCGATC	1	154	agtagaaaacggggctggaacaggatgaacTGTTTATCCTCCTCTATCTTCTGGAATTGCTCATGCTGGAGCTTCAGTAGATTTAGCAATTTTTTCTCTTCATTTAGCAGGAATTTCTTCTATTTTAGGAGCAGTAAATTTTATTACAACAGTAATTAATATACGGTCTCCAGGAATTACATTAgatcgaataccattatttgtttgatcggtagttatt	Anopheles gambiae voucher NC084a cytochrome oxidase subunit 1 (COI) gene, partial cds; mitochondrial
GU908006	639	species	49918	Anopheles earlei	7164	Anopheles	7157	Culicidae	2759	Eukaryota	D	GGAGCTGGAACAGGATGAAC	0	GATCAAACAAATAAAGGTATTCGATC	0	154	agtagaaaatggagctggaacaggatgaacTGTTTATCCCCCACTATCCTCTGGTATTGCTCACGCAGGAGCTTCAGTAGATTTAGCTATTTTTTCATTACATTTAGCAGGAATTTCTTCAATTTTAGGGGCTGTAAATTTTATTACAACTGTAATTAATATACGATCTCCAGGAATTACTCTTgatcgaatacctttatttgtttgatctgttgtaatt	Anopheles earlei voucher mosqN1-34 cytochrome oxidase subunit 1 (COI) gene, partial cds; mitochondrial
GU908005	402	species	49918	Anopheles earlei	7164	Anopheles	7157	Culicidae	2759	Eukaryota	D	GGAGCTGGAACAGGATGAAC	0	GATCAAACAAATAAAGGTATTCGATC	0	154	agtagaaaatggagctggaacaggatgaacTGTTTATCCTCCACTATCCTCTGGTATTGCTCACGCAGGAGCTTCAGTAGATTTAGCTATTTTTTCATTACATTTAGCAGGAATTTCTTCAATTTTAGGAGCTGTAAATTTTATTACAACTGTAATTAATATACGATCTCCAGGAATTACTCTTgatcgaatacctttatttgtttgatctgttgtaatt	Anopheles earlei voucher mosqEA38mF2 cytochrome oxidase subunit 1 (COI) gene, partial cds; mitochondrial
GU908004	639	species	49918	Anopheles earlei	7164	Anopheles	7157	Culicidae	2759	Eukaryota	D	GGAGCTGGAACAGGATGAAC	0	GATCAAACAAATAAAGGTATTCGATC	0	154	agtagaaaatggagctggaacaggatgaacTGTTTATCCTCCACTATCTTCTGGTATTGCTCACGCAGGAGCTTCAGTAGATTTAGCTATTTTTTCATTACATTTAGCAGGAATTTCTTCAATTTTAGGAGCTGTAAATTTTATTACAACTGTAATTAATATACGATCTCCAGGAATTACTCTTgatcgaatacctttatttgtttgatctgttgtaatt	Anopheles earlei voucher mosq184-51 cytochrome oxidase subunit 1 (COI) gene, partial cds; mitochondrial
GU908003	639	species	49918	Anopheles earlei	7164	Anopheles	7157	Culicidae	2759	Eukaryota	D	GGGGCTGGAACAGGATGAAC	0	GATCAAACAAATAAAGGTATTCGATC	0	154	agtagaaaatggggctggaacaggatgaacTGTTTATCCCCCACTATCCTCTGGTATTGCTCACGCAGGAGCTTCAGTAGATTTAGCTATTTTTTCATTACATTTAGCAGGAATTTCTTCAATTTTAGGGGCTGTAAATTTTATTACAACTGTAATTAATATACGATCTCCAGGAATTACTCTTgatcgaatacctttatttgtttgatctgttgtaatt	Anopheles earlei voucher mosq184-3 cytochrome oxidase subunit 1 (COI) gene, partial cds; mitochondrial
GU908002	639	species	49918	Anopheles earlei	7164	Anopheles	7157	Culicidae	2759	Eukaryota	D	GGAGCTGGAACAGGATGAAC	0	GATCAAACAAATAAAGGTATTCGATC	0	154	agtagaaaatggagctggaacaggatgaacTGTTTATCCCCCACTATCCTCTGGTATTGCTCACGCAGGAGCTTCAGTAGATTTAGCTATTTTTTCATTACATTTAGCAGGAATTTCTTCAATTTTAGGGGCTGTAAATTTTATTACAACTGTAATTAATATACGATCTCCAGGAATTACTCTTgatcgaatacctttatttgtttgatctgttgtaatt	Anopheles earlei voucher AF425843 cytochrome oxidase subunit 1 (COI) gene, partial cds; mitochondrial
GU908001	639	species	7163	Aedes vexans	7158	Aedes	7157	Culicidae	2759	Eukaryota	D	GGAGCAGGGACAGGATGAAC	0	GATCAAACAAATAAAGGTAATCGATC	0	154	agtagaaaatggagcagggacaggatgaacAGTTTATCCTCCTCTTTCATCAGGAACAGCTCACGCTGGAGCTTCTGTTGATTTAGCAATTTTCTCTCTTCATTTAGCAGGAATTTCATCTATTTTAGGAGCAGTAAATTTTATTACTACTGTTATTAATATACGATCATCTGGGATTACTTTAgatcgattacctttatttgtttgatctgtagtaatt	Aedes vexans voucher mosqVXVN51 cytochrome oxidase subunit 1 (COI) gene, partial cds; mitochondrial
GU908000	639	species	7163	Aedes vexans	7158	Aedes	7157	Culicidae	2759	Eukaryota	D	GGAGCAGGGACAGGATGAAC	0	GATCAAACAAATAAAGGTAATCGATC	0	154	agtagaaaatggagcagggacaggatgaacAGTTTATCCTCCTCTTTCATCAGGAACAGCTCATGCTGGAGCTTCTGTTGATTTAGCAATTTTCTCTCTTCATTTAGCAGGGATTTCATCTATTTTAGGAGCAGTAAATTTTATTACTACTGTTATTAATATACGATCATCTGGAATTACTTTAgatcgattacctttatttgtttgatctgtagtaatt	Aedes vexans voucher mosqVXVN50 cytochrome oxidase subunit 1 (COI) gene, partial cds; mitochondrial
GU907999	639	species	7163	Aedes vexans	7158	Aedes	7157	Culicidae	2759	Eukaryota	D	GGAGCAGGGACAGGATGAAC	0	GATCAAACAAATAAAGGTAATCGATC	0	154	agtagaaaatggagcagggacaggatgaacAGTTTATCCTCCTCTTTCATCAGGAACAGCTCACGCTGGAGCTTCTGTTGACTTAGCAATTTTCTCTCTTCATTTAGCAGGGATTTCATCTATTTTAGGAGCAGTAAATTTTATTACTACTGTTATTAATATGCGATCATCTGGAATTACTTTAgatcgattacctttatttgtttgatctgtagtaatt	Aedes vexans voucher mosqVXVN49 cytochrome oxidase subunit 1 (COI) gene, partial cds; mitochondrial
GU907997	639	species	7163	Aedes vexans	7158	Aedes	7157	Culicidae	2759	Eukaryota	D	GGAGCAGGGACAGGATGAAC	0	GATCAAACAAATAAAGGTAATCGATC	0	154	agtagaaaatggagcagggacaggatgaacAGTTTATCCTCCTCTTTCATCAGGAACAGCTCACGCTGGAGCTTCTGTTGATTTAGCAATTTTCTCTCTTCATTTAGCAGGGATTTCATCTATTTTAGGAGCAGTAAATTTTATTACTACTGTTATTAATATACGATCATCTGGGATTACTTTAgatcgattacctttatttgtttgatctgtagtaatt	Aedes vexans voucher mosqT1-2 cytochrome oxidase subunit 1 (COI) gene, partial cds; mitochondrial
GU907996	639	species	7163	Aedes vexans	7158	Aedes	7157	Culicidae	2759	Eukaryota	D	GGAGCAGGGACAGGATGAAC	0	GATCAAACAAATAAAGGTAATCGATC	0	154	agtagaaaatggagcagggacaggatgaacAGTTTATCCTCCTCTTTCATCAGGAACAGCTCACGCTGGAGCTTCTGTTGATTTAGCAATTTTCTCTCTTCATTTAGCAGGGATTTCATCTATTTTAGGAGCAGTAAATTTTATTACTACTGTTATTAATATACGATCATCTGGAATTACTTTAgatcgattacctttatttgtttgatctgtagtaatt	Aedes vexans voucher mosqT1-10 cytochrome oxidase subunit 1 (COI) gene, partial cds; mitochondrial
GU907995	639	species	7163	Aedes vexans	7158	Aedes	7157	Culicidae	2759	Eukaryota	D	GGAGCAGGGACAGGATGAAC	0	GATCAAACAAATAAAGGTAATCGATC	0	154	agtagaaaatggagcagggacaggatgaacAGTTTATCCTCCTCTTTCATCAGGAACAGCTCACGCTGGAGCTTCTGTTGATTTAGCAATTTTCTCTCTTCATTTAGCAGGAATTTCATCTATTTTAGGAGCAGTAAATTTTATTACTACTGTTATTAATATACGATCATCTGGAATTACTTTAgatcgattacctttatttgtttgatctgtagtaatt	Aedes vexans voucher mosqJ1-36 cytochrome oxidase subunit 1 (COI) gene, partial cds; mitochondrial
GU907994	639	species	7163	Aedes vexans	7158	Aedes	7157	Culicidae	2759	Eukaryota	D	GGAGCAGGGACAGGATGAAC	0	GATCAAACAAATAAAGGTAATCGATC	0	154	agtagaaaatggagcagggacaggatgaacAGTTTATCCTCCTCTTTCATCAGGAACAGCTCACGCTGGAGCTTCTGTTGATTTAGCAATTTTCTCTCTTCATTTAGCAGGAATTTCATCTATTTTAGGAGCAGTAAATTTTATTACTACTGTTATTAATATACGATCATCTGGAATTACTTTAgatcgattacctttatttgtttgatctgtagtaatt	Aedes vexans voucher mosqE1-72 cytochrome oxidase subunit 1 (COI) gene, partial cds; mitochondrial
GU907992	639	species	7163	Aedes vexans	7158	Aedes	7157	Culicidae	2759	Eukaryota	D	GGAGCAGGGACAGGATGAAC	0	GATCAAACAAATAAAGGTAATCGATC	0	154	agtagaaaatggagcagggacaggatgaacAGTTTATCCTCCTCTTTCATCAGGAACAGCTCACGCTGGAGCTTCTGTTGATTTAGCAATTTTCTCTCTTCATTTAGCAGGAATTTCATCTATTTTAGGAGCAGTAAATTTTATTACTACTGTTATTAATATACGATCATCTGGAATTACTTTAgatcgattacctttatttgtttgatctgtagtaatt	Aedes vexans voucher mosq34.03 cytochrome oxidase subunit 1 (COI) gene, partial cds; mitochondrial
GU907991	639	species	7163	Aedes vexans	7158	Aedes	7157	Culicidae	2759	Eukaryota	D	GGAGCAGGGACAGGATGAAC	0	GATCAAACAAATAAAGGTAATCGATC	0	154	agtagaaaatggagcagggacaggatgaacAGTTTATCCTCCTCTTTCATCAGGAACAGCTCACGCTGGAGCTTCTGTTGATTTAGCAATTTTCTCTCTTCATTTAGCAGGAATTTCATCTATTTTAGGAGCAGTAAATTTTATTACTACTGTTATTAATATACGATCATCTGGAATTACTTTAgatcgattacctttatttgtttgatctgtagtaatt	Aedes vexans voucher mosq281-27 cytochrome oxidase subunit 1 (COI) gene, partial cds; mitochondrial
GU907990	639	species	7163	Aedes vexans	7158	Aedes	7157	Culicidae	2759	Eukaryota	D	GGAGCAGGGACAGGATGAAC	0	GATCAAACAAATAAAGGTAATCGATC	0	154	agtagaaaatggagcagggacaggatgaacAGTTTATCCCCCTCTTTCATCAGGAACAGCTCACGCTGGAGCTTCTGTTGATTTAGCAATTTTCTCTCTTCATTTAGCAGGAATTTCATCTATTTTAGGAGCAGTAAATTTTATTACTACTGTTATTAATATACGATCATCTGGAATTACTTTAgatcgattacctttatttgtttgatctgtagtaatt	Aedes vexans voucher mosq178-22 cytochrome oxidase subunit 1 (COI) gene, partial cds; mitochondrial
GU907989	639	species	7163	Aedes vexans	7158	Aedes	7157	Culicidae	2759	Eukaryota	D	GGAGCAGGGACAGGATGAAC	0	GATCAAACAAATAAAGGTAATCGATC	0	154	agtagaaaatggagcagggacaggatgaacAGTTTATCCTCCTCTTTCATCAGGAACAGCTCACGCTGGAGCTTCTGTTGATTTAGCAATTTTCTCTCTTCATTTAGCAGGGATTTCATCTATTTTAGGAGCAGTAAATTTTATTACTACTGTTATTAATATACGATCATCTGGAATTACTTTAgatcgattacctttatttgtttgatctgtagtaatt	Aedes vexans voucher mosq16-8 cytochrome oxidase subunit 1 (COI) gene, partial cds; mitochondrial
GU907986	639	species	228918	Ochlerotatus trivittatus	190765	Ochlerotatus	7157	Culicidae	2759	Eukaryota	D	GGATCAGGAACAGGATGAAC	0	GATCAAACAAATAATGGTAATCGATC	1	154	ggtagaaaatggatcaggaacaggatgaacTGTTTATCCCCCTCTTTCATCTGGAACTGCTCATGCTGGAGCTTCTGTTGATTTAACTATTTTTTCTCTTCATTTAGCAGGAGTATCATCAATTTTAGGAGCTGTAAATTTTATTACTACTGTTATTAATATACGATCTGCAGGAATTACTTTAgatcgattaccattatttgtttgatctgttgttatt	Ochlerotatus trivittatus voucher mosqTV25 cytochrome oxidase subunit 1 (COI) gene, partial cds; mitochondrial
GU907985	632	species	228918	Ochlerotatus trivittatus	190765	Ochlerotatus	7157	Culicidae	2759	Eukaryota	D	GGATCAGGAACAGGATGAAC	0	GATCAAACAAATAATGGTAATCGATC	1	154	ggtagaaaatggatcaggaacaggatgaacTGTTTATCCCCCTCTTTCATCTGGAACTGCTCATGCTGGAGCTTCTGTTGATTTAACTATTTTTTCTCTTCATTTAGCAGGAGTATCATCAATTTTAGGAGCTGTAAATTTTATTACTACTGTTATTAATATACGATCTGCAGGAATTACTTTAgatcgattaccattatttgtttgatctgttgttatt	Ochlerotatus trivittatus voucher mosq281-74 cytochrome oxidase subunit 1 (COI) gene, partial cds; mitochondrial
GU907984	633	species	228918	Ochlerotatus trivittatus	190765	Ochlerotatus	7157	Culicidae	2759	Eukaryota	D	GGATCAGGAACAGGATGAAC	0	GATCAAACAAATAATGGTAATCGATC	1	154	ggtagaaaatggatcaggaacaggatgaacTGTTTATCCCCCTCTTTCATCTGGAACTGCTCATGCTGGAGCTTCTGTTGATTTAACTATTTTTTCTCTTCATTTAGCAGGAGTATCATCAATTTTAGGAGCTGTAAATTTTATTACTACTGTTATTAATATACGATCTGCAGGAATTACTTTAgatcgattaccattatttgtttgatctgttgttatt	Ochlerotatus trivittatus voucher mosq281-70 cytochrome oxidase subunit 1 (COI) gene, partial cds; mitochondrial
GU907983	639	species	228918	Ochlerotatus trivittatus	190765	Ochlerotatus	7157	Culicidae	2759	Eukaryota	D	GGATCAGGAACAGGATGAAC	0	GATCAAACAAATAATGGTAATCGATC	1	154	ggtagaaaatggatcaggaacaggatgaacTGTTTATCCCCCTCTTTCATCTGGAACTGCTCATGCTGGAGCTTCTGTTGATTTAACTATTTTTTCTCTTCATTTAGCAGGAGTATCATCAATTTTAGGAGCTGTAAATTTTATTACTACTGTTATTAATATACGATCTGCAGGAATTACTTTAgatcgattaccattatttgtttgatctgttgttatt	Ochlerotatus trivittatus voucher mosq281-45 cytochrome oxidase subunit 1 (COI) gene, partial cds; mitochondrial
GU907982	639	species	228918	Ochlerotatus trivittatus	190765	Ochlerotatus	7157	Culicidae	2759	Eukaryota	D	GGATCAGGAACAGGATGAAC	0	GATCAAACAAATAATGGTAATCGATC	1	154	ggtagaaaatggatcaggaacaggatgaacTGTTTATCCTCCTCTTTCATCTGGAACTGCTCATGCTGGAGCTTCTGTTGATTTAACTATTTTTTCTCTTCATTTAGCAGGAGTATCATCAATTTTAGGAGCTGTAAATTTTATTACTACTGTTATTAATATACGATCTGCAGGAATTACTTTAgatcgattaccattatttgtttgatctgttgttatt	Ochlerotatus trivittatus voucher mosq281-18 cytochrome oxidase subunit 1 (COI) gene, partial cds; mitochondrial
GU907981	639	species	228918	Ochlerotatus trivittatus	190765	Ochlerotatus	7157	Culicidae	2759	Eukaryota	D	GGATCAGGAACAGGATGAAC	0	GATCAAACAAATAATGGTAATCGATC	1	154	ggtagaaaatggatcaggaacaggatgaacTGTTTATCCCCCTCTTTCATCTGGAACTGCTCATGCTGGAGCTTCTGTTGATTTAACTATTTTTTCTCTTCATTTAGCAGGAGTATCATCAATTTTAGGAGCTGTAAATTTTATTACTACTGTTATTAATATACGATCTGCAGGAATTACTTTAgatcgattaccattatttgtttgatctgttgttatt	Ochlerotatus trivittatus voucher mosq281-15 cytochrome oxidase subunit 1 (COI) gene, partial cds; mitochondrial
GU907980	639	species	228918	Ochlerotatus trivittatus	190765	Ochlerotatus	7157	Culicidae	2759	Eukaryota	D	GGATCAGGAACAGGATGAAC	0	GATCAAACAAATAATGGTAATCGATC	1	154	agtagaaaatggatcaggaacaggatgaacTGTTTATCCCCCTCTTTCATCTGGAACTGCTCATGCTGGAGCTTCTGTTGATTTAACTATTTTTTCTCTTCATTTAGCAGGAGTATCATCAATTTTAGGAGCTGTAAATTTTATTACTACTGTTATTAATATACGATCTGCAGGAATTACTTTAgatcgattaccattatttgtttgatctgttgttatt	Ochlerotatus trivittatus voucher mosq176-9 cytochrome oxidase subunit 1 (COI) gene, partial cds; mitochondrial
GU907979	639	species	228918	Ochlerotatus trivittatus	190765	Ochlerotatus	7157	Culicidae	2759	Eukaryota	D	GGATCAGGAACAGGATGAAC	0	GATCAAACAAATAATGGTAATCGATC	1	154	agtagaaaatggatcaggaacaggatgaacTGTTTATCCCCCTCTTTCATCTGGAACTGCTCATGCTGGAGCTTCTGTTGATTTAACTATTTTTTCTCTTCATTTAGCAGGAGTATCATCAATTTTAGGAGCTGTAAATTTTATTACTACTGTTATTAATATACGATCTGCAGGAATTACTTTAgatcgattaccattatttgtttgatctgttgttatt	Ochlerotatus trivittatus voucher mosq176-21 cytochrome oxidase subunit 1 (COI) gene, partial cds; mitochondrial
GU907978	639	species	7162	Ochlerotatus triseriatus	190765	Ochlerotatus	7157	Culicidae	2759	Eukaryota	D	GGGTCAGGAACAGGTTGAAC	0	GATCAAACGAATAAAGGTAATCGATC	1	154	ggtagaaaatgggtcaggaacaggttgaacCGTTTATCCCCCACTTTCATCTGGAACAGCCCATGCCGGAGCTTCAGTTGATTTAACAATTTTTTCCCTTCATTTAGCGGGAGTATCTTCAATTTTAGGAGCAGTAAATTTTATTACTACTGTTATTAATATACGATCATCAGGAATTACTTTAgatcgattacctttattcgtttgatctgttgtaatt	Ochlerotatus triseriatus voucher mosqTS68 cytochrome oxidase subunit 1 (COI) gene, partial cds; mitochondrial
GU907977	639	species	7162	Ochlerotatus triseriatus	190765	Ochlerotatus	7157	Culicidae	2759	Eukaryota	D	GGGTCAGGAACAGGTTGAAC	0	GATCAAACGAATAAAGGTAATCGATC	1	154	ggtagaaaatgggtcaggaacaggttgaacCGTTTATCCCCCACTTTCATCTGGAACAGCCCATGCCGGAGCTTCAGTTGATTTAACAATTTTTTCCCTTCATTTAGCGGGAGTATCTTCAATTTTAGGAGCAGTAAATTTTATTACTACTGTTATTAATATACGATCATCAGGAATTACTTTAgatcgattacctttattcgtttgatctgttgtaatt	Ochlerotatus triseriatus voucher mosqTS67 cytochrome oxidase subunit 1 (COI) gene, partial cds; mitochondrial
GU907976	639	species	7162	Ochlerotatus triseriatus	190765	Ochlerotatus	7157	Culicidae	2759	Eukaryota	D	GGATCAGGAACAGGTTGAAC	0	GATCAAACGAATAAAGGTAATCGGTC	2	154	ggtagaaaatggatcaggaacaggttgaacCGTTTATCCCCCCCTTTCATCTGGAACAGCCCATGCTGGAGCTTCAGTTGATTTAACAATTTTTTCCCTTCATTTAGCAGGAGTATCTTCAATTTTAGGAGCAGTAAATTTTATTACTACTGTTATTAATATACGATCATCAGGAATTACTTTAgaccgattacctttattcgtttgatctgttgtaatt	Ochlerotatus triseriatus voucher mosqTS14 cytochrome oxidase subunit 1 (COI) gene, partial cds; mitochondrial
GU907975	399	species	7162	Ochlerotatus triseriatus	190765	Ochlerotatus	7157	Culicidae	2759	Eukaryota	D	GGGTCAGGGACAGGTTGAAC	0	GATCAAACGAATAAAGGCAATCGATC	2	154	agtagaaaatgggtcagggacaggttgaacCGTTTATCCTCCACTTTCATCTGGAACAGCCCATGCTGGAGCTTCAGTTGATTTAACAATTTTTTCCCTTCATTTAGCAGGAGTATCTTCAATTTTAGGAGCAGTAAATTTTATTACTACTGTTATTAATATACGATCATCGGGAATTACTTTAgatcgattgcctttattcgtttgatctgttgtaatt	Ochlerotatus triseriatus voucher mosq58-9mF4 cytochrome oxidase subunit 1 (COI) gene, partial cds; mitochondrial
GU907974	402	species	7162	Ochlerotatus triseriatus	190765	Ochlerotatus	7157	Culicidae	2759	Eukaryota	D	GGGTCAGGAACAGGTTGAAC	0	GATCAAACGAATAAAGGTAATCGGTC	2	154	agtagaaaatgggtcaggaacaggttgaacCGTTTATCCCCCCCTTTCATCTGGAACAGCCCATGCTGGAGCTTCAGTTGATTTAACAATTTTTTCCCTTCATTTAGCAGGAGTATCTTCAATTTTAGGAGCAGTAAATTTTATTACTACTGTTATTAATATACGATCATCAGGAATTACTTTAgaccgattacctttattcgtttgatctgttgtaatt	Ochlerotatus triseriatus voucher mosq52-18mF2 cytochrome oxidase subunit 1 (COI) gene, partial cds; mitochondrial
GU907973	639	species	7162	Ochlerotatus triseriatus	190765	Ochlerotatus	7157	Culicidae	2759	Eukaryota	D	GGGTCAGGAACAGGTTGAAC	0	GATCAAACGAATAAAGGTAATCGATC	1	154	ggtagaaaatgggtcaggaacaggttgaacCGTTTATCCCCCACTTTCATCTGGAACAGCCCATGCCGGAGCTTCAGTTGATTTAACAATTTTTTCCCTTCATTTAGCGGGAGTATCTTCAATTTTAGGAGCAGTAAATTTTATTACTACTGTTATTAATATACGATCATCAGGAATTACTTTAgatcgattacctttattcgtttgatctgttgtaatt	Ochlerotatus triseriatus voucher mosq184-35 cytochrome oxidase subunit 1 (COI) gene, partial cds; mitochondrial
GU907972	639	species	7162	Ochlerotatus triseriatus	190765	Ochlerotatus	7157	Culicidae	2759	Eukaryota	D	GGGTCAGGAACAGGTTGAAC	0	GATCAAACGAATAAAGGTAATCGATC	1	154	ggtagaaaatgggtcaggaacaggttgaacCGTTTATCCCCCACTTTCATCTGGAACAGCCCATGCCGGAGCTTCAGTTGATTTAACAATTTTTTCCCTTCATTTAGCGGGAGTATCTTCAATTTTAGGAGCAGTAAATTTTATTACTACTGTTATTAATATACGATCATCAGGAATTACTTTAgatcgattacctttattcgtttgatctgttgtaatt	Ochlerotatus triseriatus voucher mosq176-16ab cytochrome oxidase subunit 1 (COI) gene, partial cds; mitochondrial
GU907971	639	species	7162	Ochlerotatus triseriatus	190765	Ochlerotatus	7157	Culicidae	2759	Eukaryota	D	GGGTCAGGAACAGGTTGAAC	0	GATCAAACGAATAAAGGTAATCGGTC	2	154	ggtagaaaatgggtcaggaacaggttgaacCGTTTATCCCCCCCTTTCATCTGGAACAGCCCATGCTGGAGCTTCAGTTGATTTAACAATTTTTTCCCTTCATTTAGCAGGAGTATCTTCAATTTTAGGAGCAGTAAATTTTATTACTACTGTTATTAATATACGATCATCAGGAATTACTTTAgaccgattacctttattcgtttgatctgttgtaatt	Ochlerotatus triseriatus voucher mosq176-12 cytochrome oxidase subunit 1 (COI) gene, partial cds; mitochondrial
GU907970	639	species	7162	Ochlerotatus triseriatus	190765	Ochlerotatus	7157	Culicidae	2759	Eukaryota	D	GGGTCAGGAACAGGTTGAAC	0	GATCAAACGAATAAAGGTAATCGATC	1	154	ggtagaaaatgggtcaggaacaggttgaacCGTTTATCCCCCACTTTCATCTGGAACAGCCCATGCCGGAGCTTCAGTTGATTTAACAATTTTTTCCCTTCATTTAGCGGGAGTATCTTCAATTTTAGGAGCAGTAAATTTTATTACTACTGTTATTAATATACGATCATCAGGAATTACTTTAgatcgattacctttattcgtttgatctgttgtaatt	Ochlerotatus triseriatus voucher mosq172-64ab cytochrome oxidase subunit 1 (COI) gene, partial cds; mitochondrial
GU907969	639	species	7162	Ochlerotatus triseriatus	190765	Ochlerotatus	7157	Culicidae	2759	Eukaryota	D	GGGTCAGGAACAGGTTGAAC	0	GATCAAACGAATAAAGGTAATCGGTC	2	154	ggtagaaaatgggtcaggaacaggttgaacCGTTTATCCCCCCCTTTCATCTGGAACAGCCCATGCTGGAGCTTCAGTTGATTTAACAATTTTTTCCCTTCATTTAGCAGGAGTATCTTCAATTTTAGGAGCAGTAAATTTTATTACTACTGTTATTAATATACGATCATCAGGAATTACTTTAgaccgattacctttattcgtttgatctgttgtaatt	Ochlerotatus triseriatus voucher mosq172-41ab cytochrome oxidase subunit 1 (COI) gene, partial cds; mitochondrial
GU907968	639	species	228919	Ochlerotatus stimulans	190765	Ochlerotatus	7157	Culicidae	2759	Eukaryota	D	GGGTCAGGGACAGGATGAAC	0	GATCACACAAATAAGGGTAATCGGTC	3	154	agtcgaaaatgggtcagggacaggatgaacTGTATATCCACCACTTTCATCAGGAACTGCTCATGCTGGAGCCTCAGTAGATTTAACAATTTTCTCTCTTCATTTAGCTGGTGTATCCTCAATTTTAGGGGCAGTAAATTTCATTACTACTGTTATTAATATACGATCTGCAGGAATTACTTTAgaccgattacccttatttgtgtgatctgttgtaatt	Ochlerotatus stimulans voucher mosqFT59 cytochrome oxidase subunit 1 (COI) gene, partial cds; mitochondrial
GU907967	639	species	228919	Ochlerotatus stimulans	190765	Ochlerotatus	7157	Culicidae	2759	Eukaryota	D	GGGTCAGGGACAGGATGAAC	0	GATCACACAAATAAGGGTAATCGGTC	3	154	agtcgaaaatgggtcagggacaggatgaacTGTATATCCACCACTTTCATCAGGAACTGCTCATGCTGGAGCCTCAGTAGATTTAACAATTTTCTCTCTTCATTTAGCTGGTGTATCCTCAATTTTAGGGGCAGTAAATTTCATTACTACTGTTATTAATATACGATCTGCAGGAATTACTTTAgaccgattacccttatttgtgtgatctgttgtaatt	Ochlerotatus stimulans voucher mosqEX16 cytochrome oxidase subunit 1 (COI) gene, partial cds; mitochondrial
GU907966	639	species	228919	Ochlerotatus stimulans	190765	Ochlerotatus	7157	Culicidae	2759	Eukaryota	D	GGGTCAGGGACAGGATGAAC	0	GATCACACAAATAAGGGTAATCGGTC	3	154	agtcgaaaatgggtcagggacaggatgaacTGTATATCCACCACTTTCATCAGGAACTGCTCATGCTGGAGCCTCAGTAGATTTAACAATTTTCTCTCTTCATTTAGCTGGTGTATCCTCAATTTTAGGGGCAGTAAATTTCATTACTACTGTTATTAATATACGATCTGCAGGAATTACTTTAgaccgattacccttatttgtgtgatctgttgtaatt	Ochlerotatus stimulans voucher mosq44-69 cytochrome oxidase subunit 1 (COI) gene, partial cds; mitochondrial
GU907965	639	species	228919	Ochlerotatus stimulans	190765	Ochlerotatus	7157	Culicidae	2759	Eukaryota	D	GGATCAGGGACAGGATGAAC	0	GATCACACAAATAAGGGTAATCGGTC	3	154	agtcgaaaatggatcagggacaggatgaacTGTATATCCACCACTTTCATCAGGAACTGCTCATGCTGGAGCCTCAGTAGATTTAACAATTTTCTCTCTTCATTTAGCTGGTGTATCCTCAATTTTAGGAGCAGTAAATTTCATTACTACTGTTATTAATATACGATCTGCAGGAATTACTTTAgaccgattacccttatttgtgtgatctgttgtaatt	Ochlerotatus stimulans voucher mosq33.03 cytochrome oxidase subunit 1 (COI) gene, partial cds; mitochondrial
GU907964	639	species	228919	Ochlerotatus stimulans	190765	Ochlerotatus	7157	Culicidae	2759	Eukaryota	D	GGGTCAGGGACAGGATGAAC	0	GATCACACAAATAAGGGTAATCGGTC	3	154	agtcgaaaatgggtcagggacaggatgaacTGTATATCCACCACTTTCATCAGGAACTGCTCATGCTGGAGCCTCAGTAGATTTAACAATTTTCTCTCTTCATTTAGCTGGTGTATCCTCAATTTTAGGGGCAGTAAATTTCATTACTACTGTTATTAATATACGATCTGCAGGAATTACTTTAgaccgattacccttatttgtgtgatctgttgtaatt	Ochlerotatus stimulans voucher mosq32-19 cytochrome oxidase subunit 1 (COI) gene, partial cds; mitochondrial
GU907963	639	species	228919	Ochlerotatus stimulans	190765	Ochlerotatus	7157	Culicidae	2759	Eukaryota	D	GGATCAGGGACAGGATGAAC	0	GATCACACAAATAAGGGTAATCGGTC	3	154	agtcgaaaatggatcagggacaggatgaacTGTATATCCACCACTTTCATCAGGAACTGCTCATGCTGGAGCCTCAGTAGATTTAACAATTTTCTCTCTTCATTTAGCTGGTGTATCCTCAATTTTAGGGGCAGTAAATTTCATTACTACTGTTATTAATATACGATCTGCAGGAATTACTTTAgaccgattacccttatttgtgtgatctgttgtaatt	Ochlerotatus stimulans voucher mosq32-13 cytochrome oxidase subunit 1 (COI) gene, partial cds; mitochondrial
GU907962	639	species	228919	Ochlerotatus stimulans	190765	Ochlerotatus	7157	Culicidae	2759	Eukaryota	D	GGATCAGGGACAGGATGAAC	0	GATCACACAAATAAGGGTAATCGGTC	3	154	agtcgaaaatggatcagggacaggatgaacTGTATATCCACCACTTTCATCAGGAACTGCTCATGCTGGAGCCTCAGTAGATTTAACAATTTTCTCTCTTCATTTAGCTGGTGTATCCTCAATTTTAGGAGCAGTAAATTTCATTACTACTGTTATTAATATACGATCTGCAGGAATTACTTTAgaccgattacccttatttgtgtgatctgttgtaatt	Ochlerotatus stimulans voucher mosq31.03 cytochrome oxidase subunit 1 (COI) gene, partial cds; mitochondrial
GU907961	639	species	228919	Ochlerotatus stimulans	190765	Ochlerotatus	7157	Culicidae	2759	Eukaryota	D	GGATCAGGGACAGGATGAAC	0	GATCACACAAATAAGGGTAATCGGTC	3	154	agtcgaaaatggatcagggacaggatgaacTGTATATCCACCACTTTCATCAGGAACTGCTCATGCTGGAGCCTCAGTAGATTTAACAATTTTCTCTCTTCATTTAGCTGGTGTATCCTCAATTTTAGGAGCAGTAAATTTCATTACTACTGTTATTAATATACGATCTGCAGGAATTACTTTAgaccgattacccttatttgtgtgatctgttgtaatt	Ochlerotatus stimulans voucher mosq24-78 cytochrome oxidase subunit 1 (COI) gene, partial cds; mitochondrial
GU907960	639	species	228919	Ochlerotatus stimulans	190765	Ochlerotatus	7157	Culicidae	2759	Eukaryota	D	GGATCAGGGACAGGATGAAC	0	GATCACACAAATAAGGGTAATCGGTC	3	154	agtcgaaaatggatcagggacaggatgaacTGTATATCCACCACTTTCATCAGGAACTGCTCATGCTGGAGCCTCAGTAGATTTAACAATTTTCTCTCTTCATTTAGCTGGTGTATCCTCAATTTTAGGGGCAGTAAATTTCATTACTACTGTTATTAATATACGATCTGCAGGAATTACTTTAgaccgattacccttatttgtgtgatctgttgtaatt	Ochlerotatus stimulans voucher mosq24-17 cytochrome oxidase subunit 1 (COI) gene, partial cds; mitochondrial
GU907959	639	species	228919	Ochlerotatus stimulans	190765	Ochlerotatus	7157	Culicidae	2759	Eukaryota	D	GGATCAGGGACAGGATGAAC	0	GATCACACAAATAAGGGTAATCGGTC	3	154	agtcgaaaatggatcagggacaggatgaacTGTATATCCACCACTTTCATCAGGAACTGCTCATGCTGGAGCCTCAGTAGATTTAACAATTTTCTCTCTTCATTTAGCTGGTGTATCCTCAATTTTAGGGGCAGTAAATTTCATTACTACTGTTATTAATATACGATCTGCAGGAATTACTTTAgaccgattacccttatttgtgtgatctgttgtaatt	Ochlerotatus stimulans voucher mosq23.03 cytochrome oxidase subunit 1 (COI) gene, partial cds; mitochondrial
GU907958	639	species	228919	Ochlerotatus stimulans	190765	Ochlerotatus	7157	Culicidae	2759	Eukaryota	D	GGATCAGGGACAGGATGAAC	0	GATCACACAAATAAGGGTAATCGGTC	3	154	agtcgaaaatggatcagggacaggatgaacTGTATATCCACCACTTTCATCAGGAACTGCTCATGCTGGAGCCTCAGTAGATTTAACAATTTTCTCTCTTCATTTAGCTGGTGTATCCTCAATTTTAGGAGCAGTAAATTTCATTACTACTGTTATTAATATACGATCTGCAGGAATTACTTTAgaccgattacccttatttgtgtgatctgttgtaatt	Ochlerotatus stimulans voucher mosq21.03 cytochrome oxidase subunit 1 (COI) gene, partial cds; mitochondrial
GU907957	639	species	228919	Ochlerotatus stimulans	190765	Ochlerotatus	7157	Culicidae	2759	Eukaryota	D	GGGTCAGGGACAGGATGAAC	0	GATCACACAAATAAGGGTAATCGGTC	3	154	agtcgaaaatgggtcagggacaggatgaacTGTATATCCACCACTTTCATCAGGAACTGCTCATGCTGGAGCCTCAGTAGATTTAACAATTTTCTCTCTTCATTTAGCTGGTGTATCCTCAATTTTAGGGGCAGTAAATTTCATTACTACTGTTATTAATATACGATCTGCAGGAATTACTTTAgaccgattacccttatttgtgtgatctgttgtaatt	Ochlerotatus stimulans voucher mosq20.03 cytochrome oxidase subunit 1 (COI) gene, partial cds; mitochondrial
GU907956	639	species	228919	Ochlerotatus stimulans	190765	Ochlerotatus	7157	Culicidae	2759	Eukaryota	D	GGATCAGGGACAGGATGAAC	0	GATCACACAAATAAGGGTAATCGGTC	3	154	agtcgaaaatggatcagggacaggatgaacTGTATATCCACCACTTTCATCAGGAACTGCTCATGCTGGAGCCTCAGTAGATTTAACAATTTTCTCTCTTCATTTAGCTGGTGTATCCTCAATTTTAGGAGCAGTAAATTTCATTACTACTGTTATTAATATACGATCTGCAGGAATTACTTTAgaccgattacccttatttgtgtgatctgttgtaatt	Ochlerotatus stimulans voucher mosq2.03 cytochrome oxidase subunit 1 (COI) gene, partial cds; mitochondrial
GU907955	639	species	228919	Ochlerotatus stimulans	190765	Ochlerotatus	7157	Culicidae	2759	Eukaryota	D	GGATCAGGGACAGGATGAAC	0	GATCACACAAATAAGGGTAATCGGTC	3	154	agtcgaaaatggatcagggacaggatgaacTGTATATCCACCACTTTCATCAGGAACTGCTCATGCTGGAGCCTCAGTAGATTTAACAATTTTCTCTCTTCATTTAGCTGGTGTATCCTCAATTTTAGGAGCAGTAAATTTCATTACTACTGTTATTAATATACGATCTGCAGGAATTACTTTAgaccgattacccttatttgtgtgatctgttgtaatt	Ochlerotatus stimulans voucher mosq19.03 cytochrome oxidase subunit 1 (COI) gene, partial cds; mitochondrial
GU907954	639	species	228919	Ochlerotatus stimulans	190765	Ochlerotatus	7157	Culicidae	2759	Eukaryota	D	GGGTCAGGGACAGGATGAAC	0	GATCACACAAATAAGGGTAATCGGTC	3	154	agtcgaaaatgggtcagggacaggatgaacTGTATACCCACCACTTTCATCAGGAACTGCTCATGCTGGAGCCTCAGTAGATTTAACAATTTTCTCTCTTCATTTAGCTGGTGTATCCTCAATTTTAGGGGCAGTAAATTTCATTACTACTGTTATTAATATACGATCTGCAGGAATTACTTTAgaccgattacccttatttgtgtgatctgttgtaatt	Ochlerotatus stimulans voucher mosq184-8 cytochrome oxidase subunit 1 (COI) gene, partial cds; mitochondrial
GU907953	639	species	228919	Ochlerotatus stimulans	190765	Ochlerotatus	7157	Culicidae	2759	Eukaryota	D	GGGTCAGGGACAGGATGAAC	0	GATCACACAAATAAGGGTAATCGGTC	3	154	agtcgaaaatgggtcagggacaggatgaacTGTATATCCACCACTTTCATCAGGAACTGCTCATGCTGGAGCCTCAGTAGATTTAACAATTTTCTCTCTTCATTTAGCTGGTGTATCCTCAATTTTAGGGGCAGTAAATTTCATTACTACTGTTATTAATATACGATCTGCAGGAATTACTTTAgaccgattacccttatttgtgtgatctgttgtaatt	Ochlerotatus stimulans voucher mosq184-38 cytochrome oxidase subunit 1 (COI) gene, partial cds; mitochondrial
GU907952	639	species	228919	Ochlerotatus stimulans	190765	Ochlerotatus	7157	Culicidae	2759	Eukaryota	D	GGGTCAGGGACAGGATGAAC	0	GATCACACAAATAAGGGTAATCGGTC	3	154	agtcgaaaatgggtcagggacaggatgaacTGTATATCCACCACTTTCATCAGGAACTGCTCATGCTGGAGCCTCAGTAGATTTAACAATTTTCTCTCTTCATTTAGCTGGTGTATCCTCAATTTTAGGAGCAGTAAATTTCATTACTACTGTTATTAATATACGATCTGCAGGAATTACTTTAgaccgattacccttatttgtgtgatctgttgtaatt	Ochlerotatus stimulans voucher mosq18.03 cytochrome oxidase subunit 1 (COI) gene, partial cds; mitochondrial
GU907951	639	species	228919	Ochlerotatus stimulans	190765	Ochlerotatus	7157	Culicidae	2759	Eukaryota	D	GGATCAGGGACAGGATGAAC	0	GATCACACAAATAAGGGTAATCGGTC	3	154	agtcgaaaatggatcagggacaggatgaacTGTATATCCACCACTTTCATCAGGAACTGCTCATGCTGGAGCCTCAGTAGATTTAACAATTTTCTCTCTTCATTTAGCTGGTGTATCCTCAATTTTAGGGGCAGTAAATTTCATTACTACTGTTATTAATATACGATCTGCAGGAATTACTTTAgaccgattacccttatttgtgtgatctgttgtaatt	Ochlerotatus stimulans voucher mosq17.03 cytochrome oxidase subunit 1 (COI) gene, partial cds; mitochondrial
GU907950	639	species	228919	Ochlerotatus stimulans	190765	Ochlerotatus	7157	Culicidae	2759	Eukaryota	D	GGATCAGGGACAGGATGAAC	0	GATCACACAAATAAGGGTAATCGGTC	3	154	agtcgaaaatggatcagggacaggatgaacTGTATATCCACCACTTTCATCAGGAACTGCTCATGCTGGAGCCTCAGTAGATTTAACAATTTTCTCTCTTCATTTAGCTGGTGTATCCTCAATTTTAGGGGCAGTAAATTTCATTACTACTGTTATTAATATACGATCTGCAGGAATTACTTTAgaccgattacccttatttgtgtgatctgttgtaatt	Ochlerotatus stimulans voucher mosq16.03 cytochrome oxidase subunit 1 (COI) gene, partial cds; mitochondrial
GU907949	639	species	228919	Ochlerotatus stimulans	190765	Ochlerotatus	7157	Culicidae	2759	Eukaryota	D	GGATCAGGGACAGGATGAAC	0	GATCACACAAATAAGGGTAATCGGTC	3	154	agtcgaaaatggatcagggacaggatgaacTGTATACCCACCACTTTCATCAGGAACTGCTCATGCTGGAGCCTCAGTAGATTTAACAATTTTCTCTCTTCATTTAGCTGGTGTATCCTCAATTTTAGGGGCAGTAAATTTCATTACTACTGTTATTAATATACGATCTGCAGGAATTACTTTAgaccgattacccttatttgtgtgatctgttgtaatt	Ochlerotatus stimulans voucher mosq15.03 cytochrome oxidase subunit 1 (COI) gene, partial cds; mitochondrial
GU907948	639	species	228919	Ochlerotatus stimulans	190765	Ochlerotatus	7157	Culicidae	2759	Eukaryota	D	GGGTCAGGGACAGGATGAAC	0	GATCACACAAATAAGGGTAATCGGTC	3	154	agtcgaaaatgggtcagggacaggatgaacTGTATATCCACCACTTTCATCAGGAACTGCTCATGCTGGAGCCTCAGTAGATTTAACAATTTTCTCTCTTCATTTAGCTGGTGTATCCTCAATTTTAGGGGCAGTAAATTTCATTACTACTGTTATTAATATACGATCTGCAGGAATTACTTTAgaccgattacccttatttgtgtgatctgttgtaatt	Ochlerotatus stimulans voucher mosq14-19 cytochrome oxidase subunit 1 (COI) gene, partial cds; mitochondrial
GU907947	639	species	228919	Ochlerotatus stimulans	190765	Ochlerotatus	7157	Culicidae	2759	Eukaryota	D	GGGTCAGGGACAGGATGAAC	0	GATCACACAAATAAGGGTAATCGGTC	3	154	agtcgaaaatgggtcagggacaggatgaacTGTATATCCACCACTTTCATCAGGAACTGCTCATGCTGGAGCCTCAGTAGATTTAACAATTTTCTCTCTTCATTTAGCTGGTGTATCCTCAATTTTAGGGGCAGTAAATTTCATTACTACTGTTATTAATATACGATCTGCAGGAATTACTTTAgaccgattacccttatttgtgtgatctgttgtaatt	Ochlerotatus stimulans voucher mosq14.03 cytochrome oxidase subunit 1 (COI) gene, partial cds; mitochondrial
[truncated: 7,247 more rows]
